# Supplementary material
Source: publisher site journal article supplement (https://www.spandidos-publications.com/5525/downloadSupplementary)
Supplement: Supplementary file 1 [file downloadSupplementary]

## Sheet: 7530
	Detailed information of the proteins identified by MS.
Accession	Name	Gene	Description	Mol(kDa)	Length	pCDH-SERPINA3/pCDH-NC	log2(pCDH-SERPINA3/pCDH-NC)	P-value	P.adjust	Count	pCDH-SERPINA3 1	pCDH-SERPINA3 2	pCDH-NC 1	pCDH-NC 2
A6NK58	LIPT2_HUMAN	LIPT2	Putative lipoyltransferase 2, mitochondrial OS=Homo sapiens OX=9606 GN=LIPT2 PE=1 SV=1	25.195	231	NA	NA	NA	NA	2	15.2681	10.3463	14.1865	10.3463
O14494	PLPP1_HUMAN	PLPP1	Phospholipid phosphatase 1 OS=Homo sapiens OX=9606 GN=PLPP1 PE=1 SV=1	32.156	284	NA	NA	NA	NA	2	12.2448	10.3463	12.2017	10.3463
O14593	RFXK_HUMAN	RFXANK	DNA-binding protein RFXANK OS=Homo sapiens OX=9606 GN=RFXANK PE=1 SV=2	28.102	260	NA	NA	NA	NA	2	15.6735	10.3463	10.3463	14.8846
O94885	SASH1_HUMAN	SASH1	SAM and SH3 domain-containing protein 1 OS=Homo sapiens OX=9606 GN=SASH1 PE=1 SV=3	136.653	1247	NA	NA	NA	NA	2	10.3463	15.0223	10.3463	15.3231
O95406	CNIH1_HUMAN	CNIH1	Protein cornichon homolog 1 OS=Homo sapiens OX=9606 GN=CNIH1 PE=1 SV=1	16.699	144	NA	NA	NA	NA	2	10.3463	18.3203	17.6653	10.3463
P14867	GBRA1_HUMAN	GABRA1	Gamma-aminobutyric acid receptor subunit alpha-1 OS=Homo sapiens OX=9606 GN=GABRA1 PE=1 SV=3	51.802	456	NA	NA	NA	NA	2	14.59	10.3463	10.3463	15.7829
P16403	H12_HUMAN	H1-2	Histone H1.2 OS=Homo sapiens OX=9606 GN=H1-2 PE=1 SV=2	21.365	213	NA	NA	NA	NA	2	10.3463	20.4715	19.8573	10.3463
P27037	AVR2A_HUMAN	ACVR2A	Activin receptor type-2A OS=Homo sapiens OX=9606 GN=ACVR2A PE=1 SV=1	57.848	513	NA	NA	NA	NA	2	10.3463	15.1647	16.846	10.3463
P46531	NOTC1_HUMAN	NOTCH1	Neurogenic locus notch homolog protein 1 OS=Homo sapiens OX=9606 GN=NOTCH1 PE=1 SV=4	272.505	2555	NA	NA	NA	NA	2	15.9202	10.3463	10.3463	15.7193
P50453	SPB9_HUMAN	SERPINB9	Serpin B9 OS=Homo sapiens OX=9606 GN=SERPINB9 PE=1 SV=1	42.404	376	NA	NA	NA	NA	2	10.3463	20.6583	10.3463	20.7252
Q06190	P2R3A_HUMAN	PPP2R3A	Serine/threonine-protein phosphatase 2A regulatory subunit B'' subunit alpha OS=Homo sapiens OX=9606 GN=PPP2R3A PE=1 SV=1	130.278	1150	NA	NA	NA	NA	2	10.3463	14.8782	10.3463	14.6395
Q12999	TSN31_HUMAN	TSPAN31	Tetraspanin-31 OS=Homo sapiens OX=9606 GN=TSPAN31 PE=1 SV=1	23.053	210	NA	NA	NA	NA	2	14.6588	10.3463	10.3463	16.1534
Q13277	STX3_HUMAN	STX3	Syntaxin-3 OS=Homo sapiens OX=9606 GN=STX3 PE=1 SV=3	33.155	289	NA	NA	NA	NA	2	10.3463	15.9935	17.1288	10.3463
Q13322	GRB10_HUMAN	GRB10	Growth factor receptor-bound protein 10 OS=Homo sapiens OX=9606 GN=GRB10 PE=1 SV=2	67.231	594	NA	NA	NA	NA	2	10.3463	14.763	14.7572	10.3463
Q4W5G0	TIGD2_HUMAN	TIGD2	Tigger transposable element-derived protein 2 OS=Homo sapiens OX=9606 GN=TIGD2 PE=3 SV=1	59.623	525	NA	NA	NA	NA	2	16.3633	10.3463	15.7954	10.3463
Q5SQH8	CF136_HUMAN	C6orf136	Uncharacterized protein C6orf136 OS=Homo sapiens OX=9606 GN=C6orf136 PE=2 SV=1	35.794	315	NA	NA	NA	NA	2	10.3463	13.3766	13.0831	10.3463
Q68DI1	ZN776_HUMAN	ZNF776	Zinc finger protein 776 OS=Homo sapiens OX=9606 GN=ZNF776 PE=1 SV=2	59.613	518	NA	NA	NA	NA	2	15.199	10.3463	14.8596	10.3463
Q6AI39	BICRL_HUMAN	BICRAL	BRD4-interacting chromatin-remodeling complex-associated protein-like OS=Homo sapiens OX=9606 GN=BICRAL PE=1 SV=2	115.084	1079	NA	NA	NA	NA	2	16.514	10.3463	10.3463	16.4913
Q6F5E8	CARL2_HUMAN	CARMIL2	Capping protein, Arp2/3 and myosin-I linker protein 2 OS=Homo sapiens OX=9606 GN=CARMIL2 PE=1 SV=2	154.689	1435	NA	NA	NA	NA	2	14.5693	10.3463	14.1534	10.3463
Q6ZT21	TMPPE_HUMAN	TMPPE	Transmembrane protein with metallophosphoesterase domain OS=Homo sapiens OX=9606 GN=TMPPE PE=1 SV=2	49.453	453	NA	NA	NA	NA	2	16.3875	10.3463	10.3463	15.1712
Q7Z7A1	CNTRL_HUMAN	CNTRL	Centriolin OS=Homo sapiens OX=9606 GN=CNTRL PE=1 SV=2	268.886	2325	NA	NA	NA	NA	2	17.7044	10.3463	16.6942	10.3463
Q8N131	PORIM_HUMAN	TMEM123	Porimin OS=Homo sapiens OX=9606 GN=TMEM123 PE=1 SV=1	21.531	208	NA	NA	NA	NA	2	20.0915	10.3463	10.3463	19.7057
Q96B67	ARRD3_HUMAN	ARRDC3	Arrestin domain-containing protein 3 OS=Homo sapiens OX=9606 GN=ARRDC3 PE=1 SV=1	46.395	414	NA	NA	NA	NA	2	10.3463	15.8517	10.3463	16.0234
Q96M89	CC138_HUMAN	CCDC138	Coiled-coil domain-containing protein 138 OS=Homo sapiens OX=9606 GN=CCDC138 PE=1 SV=1	76.219	665	NA	NA	NA	NA	2	16.2716	10.3463	16.0849	10.3463
Q99727	TIMP4_HUMAN	TIMP4	Metalloproteinase inhibitor 4 OS=Homo sapiens OX=9606 GN=TIMP4 PE=2 SV=1	25.503	224	NA	NA	NA	NA	2	15.9994	10.3463	15.4731	10.3463
Q9BVV6	TALD3_HUMAN	KIAA0586	Protein TALPID3 OS=Homo sapiens OX=9606 GN=KIAA0586 PE=1 SV=4	169.307	1533	NA	NA	NA	NA	2	10.3463	16.2819	16.114	10.3463
Q9BY76	ANGL4_HUMAN	ANGPTL4	Angiopoietin-related protein 4 OS=Homo sapiens OX=9606 GN=ANGPTL4 PE=1 SV=2	45.214	406	NA	NA	NA	NA	2	10.3463	14.992	14.3	10.3463
Q9NTU7	CBLN4_HUMAN	CBLN4	Cerebellin-4 OS=Homo sapiens OX=9606 GN=CBLN4 PE=1 SV=1	21.808	201	NA	NA	NA	NA	2	10.3463	18.0873	22.5567	10.3463
Q9UI32	GLSL_HUMAN	GLS2	Glutaminase liver isoform, mitochondrial OS=Homo sapiens OX=9606 GN=GLS2 PE=1 SV=2	66.323	602	NA	NA	NA	NA	2	10.3463	20.9373	10.3463	19.6703
Q9UJA3	MCM8_HUMAN	MCM8	DNA helicase MCM8 OS=Homo sapiens OX=9606 GN=MCM8 PE=1 SV=2	93.697	840	NA	NA	NA	NA	2	10.3463	16.8239	10.3463	16.3443
Q9Y275	TN13B_HUMAN	TNFSF13B	Tumor necrosis factor ligand superfamily member 13B OS=Homo sapiens OX=9606 GN=TNFSF13B PE=1 SV=1	31.223	285	NA	NA	NA	NA	2	10.3463	14.9605	10.3463	14.865
Q9Y2P4	S27A6_HUMAN	SLC27A6	Long-chain fatty acid transport protein 6 OS=Homo sapiens OX=9606 GN=SLC27A6 PE=1 SV=1	70.112	619	NA	NA	NA	NA	2	20.0171	10.3463	10.3463	21.3157
Q9Y2P5	S27A5_HUMAN	SLC27A5	Bile acyl-CoA synthetase OS=Homo sapiens OX=9606 GN=SLC27A5 PE=1 SV=1	75.385	690	NA	NA	NA	NA	2	16.1487	10.3463	17.7936	10.3463
Q9Y4G2	PKHM1_HUMAN	PLEKHM1	Pleckstrin homology domain-containing family M member 1 OS=Homo sapiens OX=9606 GN=PLEKHM1 PE=1 SV=3	117.443	1056	NA	NA	NA	NA	2	14.0507	10.3463	13.675	10.3463
A8MWL7	TM14D_HUMAN	TMEM14DP	Transmembrane protein 14DP OS=Homo sapiens OX=9606 GN=TMEM14DP PE=5 SV=2	12.177	114	NA	NA	NA	NA	1	13.9422	10.3463	10.3463	10.3463
O95415	BRI3_HUMAN	BRI3	Brain protein I3 OS=Homo sapiens OX=9606 GN=BRI3 PE=1 SV=1	13.645	125	NA	NA	NA	NA	1	18.1522	10.3463	10.3463	10.3463
P04908	H2A1B_HUMAN	H2AC4	Histone H2A type 1-B/E OS=Homo sapiens OX=9606 GN=H2AC4 PE=1 SV=2	14.135	130	NA	NA	NA	NA	1	16.9915	10.3463	10.3463	10.3463
P05107	ITB2_HUMAN	ITGB2	Integrin beta-2 OS=Homo sapiens OX=9606 GN=ITGB2 PE=1 SV=2	84.782	769	NA	NA	NA	NA	1	20.0369	10.3463	10.3463	10.3463
P34998	CRFR1_HUMAN	CRHR1	Corticotropin-releasing factor receptor 1 OS=Homo sapiens OX=9606 GN=CRHR1 PE=1 SV=1	50.719	444	NA	NA	NA	NA	1	10.3463	10.3463	13.1081	10.3463
P35609	ACTN2_HUMAN	ACTN2	Alpha-actinin-2 OS=Homo sapiens OX=9606 GN=ACTN2 PE=1 SV=1	103.854	894	NA	NA	NA	NA	1	20.5518	10.3463	10.3463	10.3463
Q6P5R6	RL22L_HUMAN	RPL22L1	60S ribosomal protein L22-like 1 OS=Homo sapiens OX=9606 GN=RPL22L1 PE=1 SV=2	14.607	122	NA	NA	NA	NA	1	14.6227	10.3463	10.3463	10.3463
Q6UWP8	SBSN_HUMAN	SBSN	Suprabasin OS=Homo sapiens OX=9606 GN=SBSN PE=1 SV=2	60.541	590	NA	NA	NA	NA	1	10.3463	10.3463	10.3463	15.8688
Q6ZN57	ZFP2_HUMAN	ZFP2	Zinc finger protein 2 homolog OS=Homo sapiens OX=9606 GN=ZFP2 PE=1 SV=1	52.74	461	NA	NA	NA	NA	1	10.3463	10.3463	10.3463	14.6322
Q8IVF6	AN18A_HUMAN	ANKRD18A	Ankyrin repeat domain-containing protein 18A OS=Homo sapiens OX=9606 GN=ANKRD18A PE=2 SV=3	115.597	992	NA	NA	NA	NA	1	10.3463	10.3463	22.4272	10.3463
Q8N9A8	NEPR1_HUMAN	CNEP1R1	Nuclear envelope phosphatase-regulatory subunit 1 OS=Homo sapiens OX=9606 GN=CNEP1R1 PE=1 SV=1	14.267	125	NA	NA	NA	NA	1	10.3463	10.3463	14.5965	10.3463
Q8NFZ5	TNIP2_HUMAN	TNIP2	TNFAIP3-interacting protein 2 OS=Homo sapiens OX=9606 GN=TNIP2 PE=1 SV=1	48.7	429	NA	NA	NA	NA	1	15.6557	10.3463	10.3463	10.3463
Q92485	ASM3B_HUMAN	SMPDL3B	Acid sphingomyelinase-like phosphodiesterase 3b OS=Homo sapiens OX=9606 GN=SMPDL3B PE=1 SV=2	50.814	455	NA	NA	NA	NA	1	18.0605	10.3463	10.3463	10.3463
Q96BR9	ZBT8A_HUMAN	ZBTB8A	Zinc finger and BTB domain-containing protein 8A OS=Homo sapiens OX=9606 GN=ZBTB8A PE=1 SV=2	50.141	441	NA	NA	NA	NA	1	16.2568	10.3463	10.3463	10.3463
Q96P50	ACAP3_HUMAN	ACAP3	Arf-GAP with coiled-coil, ANK repeat and PH domain-containing protein 3 OS=Homo sapiens OX=9606 GN=ACAP3 PE=1 SV=2	92.495	834	NA	NA	NA	NA	1	10.3463	10.3463	14.5241	10.3463
Q99958	FOXC2_HUMAN	FOXC2	Forkhead box protein C2 OS=Homo sapiens OX=9606 GN=FOXC2 PE=1 SV=1	53.719	501	NA	NA	NA	NA	1	15.6609	10.3463	10.3463	10.3463
Q9H1X3	DJC25_HUMAN	DNAJC25	DnaJ homolog subfamily C member 25 OS=Homo sapiens OX=9606 GN=DNAJC25 PE=1 SV=1	42.404	360	NA	NA	NA	NA	1	10.3463	10.3463	10.3463	13.6702
Q0VAQ4	SMAGP_HUMAN	SMAGP	Small cell adhesion glycoprotein OS=Homo sapiens OX=9606 GN=SMAGP PE=1 SV=1	10.679	97	375.241	8.55167	5.8912e-07	0.00443608	2	18.8914	18.9046	10.3463	10.3463
P01011	AACT_HUMAN	SERPINA3	Alpha-1-antichymotrypsin OS=Homo sapiens OX=9606 GN=SERPINA3 PE=1 SV=2	47.651	423	210.88	7.72028	3.90736e-05	0.0980746	2	18.1149	18.0183	10.3463	10.3463
P22079	PERL_HUMAN	LPO	Lactoperoxidase OS=Homo sapiens OX=9606 GN=LPO PE=1 SV=2	80.288	712	100.793	6.65525	0.000242177	0.227949	2	17.1052	16.898	10.3463	10.3463
P81274	GPSM2_HUMAN	GPSM2	G-protein-signaling modulator 2 OS=Homo sapiens OX=9606 GN=GPSM2 PE=1 SV=3	76.662	684	47.806	5.57912	0.00117511	0.500348	2	16.1169	15.734	10.3463	10.3463
Q96NW7	LRRC7_HUMAN	LRRC7	Leucine-rich repeat-containing protein 7 OS=Homo sapiens OX=9606 GN=LRRC7 PE=1 SV=1	172.581	1537	25.4766	4.6711	0.420256	0.990959	3	19.7577	19.5593	10.3463	19.6285
O43309	ZSC12_HUMAN	ZSCAN12	Zinc finger and SCAN domain-containing protein 12 OS=Homo sapiens OX=9606 GN=ZSCAN12 PE=1 SV=1	70.222	604	22.8635	4.51497	0.000109393	0.164746	2	14.8141	14.9085	10.3463	10.3463
P53801	PTTG_HUMAN	PTTG1IP	Pituitary tumor-transforming gene 1 protein-interacting protein OS=Homo sapiens OX=9606 GN=PTTG1IP PE=1 SV=1	20.324	180	22.8209	4.51228	0.44718	0.990959	3	19.476	19.8528	10.3463	19.9579
F8WCM5	INSR2_HUMAN	INS-IGF2	Insulin, isoform 2 OS=Homo sapiens OX=9606 GN=INS-IGF2 PE=2 SV=1	21.537	200	20.1344	4.33159	0.441466	0.990959	3	19.618	18.7982	10.3463	19.4067
P51587	BRCA2_HUMAN	BRCA2	Breast cancer type 2 susceptibility protein OS=Homo sapiens OX=9606 GN=BRCA2 PE=1 SV=3	384.202	3418	19.3967	4.27774	0.000467565	0.292716	2	14.7166	14.5315	10.3463	10.3463
Q9H2K0	IF3M_HUMAN	MTIF3	Translation initiation factor IF-3, mitochondrial OS=Homo sapiens OX=9606 GN=MTIF3 PE=1 SV=4	31.725	278	19.306	4.27098	0.242635	0.990959	3	17.2066	17.2356	15.5539	10.3463
Q9C0K3	ARP3C_HUMAN	ACTR3C	Actin-related protein 3C OS=Homo sapiens OX=9606 GN=ACTR3C PE=2 SV=1	23.712	210	17.9675	4.16732	0.371846	0.990959	3	19.0668	16.9458	17.3316	10.3463
O43791	SPOP_HUMAN	SPOP	Speckle-type POZ protein OS=Homo sapiens OX=9606 GN=SPOP PE=1 SV=1	42.132	374	16.291	4.026	0.0420009	0.990959	2	13.5201	15.2245	10.3463	10.3463
P01893	HLAH_HUMAN	HLA-H	Putative HLA class I histocompatibility antigen, alpha chain H OS=Homo sapiens OX=9606 GN=HLA-H PE=5 SV=3	40.892	362	16.2551	4.02282	0.472928	0.990959	3	19.9084	17.7436	10.3463	19.26
Q9Y4X0	AMMR1_HUMAN	AMMECR1	AMME syndrome candidate gene 1 protein OS=Homo sapiens OX=9606 GN=AMMECR1 PE=1 SV=1	35.463	333	14.5549	3.86343	0.413189	0.990959	3	18.1937	17.752	10.3463	17.8726
P11169	GTR3_HUMAN	SLC2A3	Solute carrier family 2, facilitated glucose transporter member 3 OS=Homo sapiens OX=9606 GN=SLC2A3 PE=1 SV=1	53.924	496	14.1773	3.82551	9.57013e-06	0.0360315	2	14.1837	14.16	10.3463	10.3463
P02788	TRFL_HUMAN	LTF	Lactotransferrin OS=Homo sapiens OX=9606 GN=LTF PE=1 SV=6	78.182	710	13.6868	3.77472	0.441096	0.990959	3	18.2141	17.9436	10.3463	18.2619
Q9NRJ7	PCDBG_HUMAN	PCDHB16	Protocadherin beta-16 OS=Homo sapiens OX=9606 GN=PCDHB16 PE=1 SV=3	84.983	776	13.4162	3.74591	0.184143	0.990959	3	15.984	15.9551	14.1009	10.3463
O94953	KDM4B_HUMAN	KDM4B	Lysine-specific demethylase 4B OS=Homo sapiens OX=9606 GN=KDM4B PE=1 SV=4	121.897	1096	12.8219	3.68054	0.294579	0.990959	3	16.5768	16.7053	10.3463	15.5747
P42568	AF9_HUMAN	MLLT3	Protein AF-9 OS=Homo sapiens OX=9606 GN=MLLT3 PE=1 SV=2	63.351	568	12.1075	3.59783	0.305986	0.990959	3	17.0151	16.0653	10.3463	15.5385
P07996	TSP1_HUMAN	THBS1	Thrombospondin-1 OS=Homo sapiens OX=9606 GN=THBS1 PE=1 SV=2	129.383	1170	11.8746	3.56981	0.384539	0.990959	3	17.161	17.1364	10.3463	16.8114
Q8WUQ7	CATIN_HUMAN	CACTIN	Cactin OS=Homo sapiens OX=9606 GN=CACTIN PE=1 SV=3	88.702	758	11.8628	3.56837	0.432947	0.990959	3	17.8439	17.2952	17.656	10.3463
Q969M1	TM40L_HUMAN	TOMM40L	Mitochondrial import receptor subunit TOM40B OS=Homo sapiens OX=9606 GN=TOMM40L PE=1 SV=1	33.917	308	11.2712	3.49458	0.443472	0.990959	3	17.384	17.6702	10.3463	17.7187
Q9H6K1	ILRUN_HUMAN	ILRUN	Protein ILRUN OS=Homo sapiens OX=9606 GN=ILRUN PE=1 SV=2	32.872	298	10.2862	3.36264	0.256996	0.990959	3	15.794	15.9061	14.6285	10.3463
Q9NSU2	TREX1_HUMAN	TREX1	Three-prime repair exonuclease 1 OS=Homo sapiens OX=9606 GN=TREX1 PE=1 SV=2	33.212	314	10.0857	3.33423	0.308423	0.990959	3	16.6088	15.5653	10.3463	15.1593
P31629	ZEP2_HUMAN	HIVEP2	Transcription factor HIVEP2 OS=Homo sapiens OX=9606 GN=HIVEP2 PE=1 SV=2	269.053	2446	9.86127	3.30177	0.356246	0.990959	3	16.5124	16.3314	10.3463	15.8939
P57086	SCND1_HUMAN	SCAND1	SCAN domain-containing protein 1 OS=Homo sapiens OX=9606 GN=SCAND1 PE=1 SV=1	19.082	179	9.48704	3.24596	0.445943	0.990959	3	16.9094	17.1676	17.2387	10.3463
A8MXV4	NUD19_HUMAN	NUDT19	Nucleoside diphosphate-linked moiety X motif 19 OS=Homo sapiens OX=9606 GN=NUDT19 PE=1 SV=1	42.233	375	9.21411	3.20384	0.493523	0.990959	3	17.7406	17.0417	10.3463	18.0283
Q92997	DVL3_HUMAN	DVL3	Segment polarity protein dishevelled homolog DVL-3 OS=Homo sapiens OX=9606 GN=DVL3 PE=1 SV=2	78.055	716	9.19195	3.20037	0.425558	0.990959	3	16.0226	17.3764	10.3463	16.6519
Q8N4V1	EMC5_HUMAN	MMGT1	ER membrane protein complex subunit 5 OS=Homo sapiens OX=9606 GN=MMGT1 PE=1 SV=1	14.686	131	9.12366	3.18961	0.459249	0.990959	3	17.6477	16.3129	10.3463	17.2351
Q7L266	ASGL1_HUMAN	ASRGL1	Isoaspartyl peptidase/L-asparaginase OS=Homo sapiens OX=9606 GN=ASRGL1 PE=1 SV=2	32.055	308	9.02957	3.17466	0.439139	0.990959	3	17.3469	16.2271	10.3463	16.8784
P78411	IRX5_HUMAN	IRX5	Iroquois-class homeodomain protein IRX-5 OS=Homo sapiens OX=9606 GN=IRX5 PE=1 SV=3	50.361	483	9.01682	3.17262	0.388982	0.990959	3	16.2085	16.6272	16.1441	10.3463
P00918	CAH2_HUMAN	CA2	Carbonic anhydrase 2 OS=Homo sapiens OX=9606 GN=CA2 PE=1 SV=2	29.246	260	8.80467	3.13827	0.416751	0.990959	3	16.1907	16.9168	16.4846	10.3463
A6NGU5	GGT3_HUMAN	GGT3P	Putative glutathione hydrolase 3 proenzyme OS=Homo sapiens OX=9606 GN=GGT3P PE=5 SV=2	61.502	568	8.72549	3.12524	0.468346	0.990959	3	17.0839	16.8977	10.3463	17.3848
Q96PE1	AGRA2_HUMAN	ADGRA2	Adhesion G protein-coupled receptor A2 OS=Homo sapiens OX=9606 GN=ADGRA2 PE=1 SV=2	142.647	1338	7.98323	2.99697	0.0177952	0.990959	2	12.9381	13.7485	10.3463	10.3463
O95780	ZN682_HUMAN	ZNF682	Zinc finger protein 682 OS=Homo sapiens OX=9606 GN=ZNF682 PE=2 SV=1	58.361	498	7.87395	2.97709	0.424883	0.990959	3	16.2489	16.3851	16.3336	10.3463
Q9NQB0	TF7L2_HUMAN	TCF7L2	Transcription factor 7-like 2 OS=Homo sapiens OX=9606 GN=TCF7L2 PE=1 SV=2	67.919	619	7.77984	2.95974	0.33381	0.990959	3	15.6319	15.6659	15.032	10.3463
Q6PII3	CC174_HUMAN	CCDC174	Coiled-coil domain-containing protein 174 OS=Homo sapiens OX=9606 GN=CCDC174 PE=1 SV=3	53.958	467	7.77244	2.95837	0.410064	0.990959	3	16.2565	16.0764	10.3463	16.0698
P48454	PP2BC_HUMAN	PPP3CC	Serine/threonine-protein phosphatase 2B catalytic subunit gamma isoform OS=Homo sapiens OX=9606 GN=PPP3CC PE=1 SV=3	58.129	512	7.63969	2.93351	0.499559	0.990959	3	16.3456	17.3242	10.3463	17.4565
O00506	STK25_HUMAN	STK25	Serine/threonine-protein kinase 25 OS=Homo sapiens OX=9606 GN=STK25 PE=1 SV=1	48.112	426	7.07165	2.82205	0.323906	0.990959	3	15.8471	14.6793	10.3463	14.536
Q6IQ19	CCSAP_HUMAN	CCSAP	Centriole, cilia and spindle-associated protein OS=Homo sapiens OX=9606 GN=CCSAP PE=1 SV=2	30.216	270	6.58759	2.71975	0.428431	0.990959	3	15.9687	15.6776	15.8605	10.3463
Q3ZCX4	ZN568_HUMAN	ZNF568	Zinc finger protein 568 OS=Homo sapiens OX=9606 GN=ZNF568 PE=2 SV=2	74.369	644	6.15498	2.62175	0.425872	0.990959	3	15.6999	15.5208	10.3463	15.6309
Q5T4F4	ZFY27_HUMAN	ZFYVE27	Protrudin OS=Homo sapiens OX=9606 GN=ZFYVE27 PE=1 SV=1	45.843	411	5.90008	2.56074	0.378608	0.990959	3	15.2573	15.1209	10.3463	14.9105
Q8TAS1	UHMK1_HUMAN	UHMK1	Serine/threonine-protein kinase Kist OS=Homo sapiens OX=9606 GN=UHMK1 PE=1 SV=2	46.546	419	5.79959	2.53595	0.441839	0.990959	3	15.4823	15.612	15.6761	10.3463
Q9Y6P5	SESN1_HUMAN	SESN1	Sestrin-1 OS=Homo sapiens OX=9606 GN=SESN1 PE=1 SV=2	56.557	492	5.22865	2.38644	0.4023	0.990959	3	15.0449	14.9465	14.8722	10.3463
Q9H867	MT21D_HUMAN	VCPKMT	Protein-lysine methyltransferase METTL21D OS=Homo sapiens OX=9606 GN=VCPKMT PE=1 SV=2	25.807	229	5.06321	2.34005	0.495689	0.990959	3	14.538	16.2397	10.3463	15.7513
Q92572	AP3S1_HUMAN	AP3S1	AP-3 complex subunit sigma-1 OS=Homo sapiens OX=9606 GN=AP3S1 PE=1 SV=1	21.732	193	5.05955	2.33901	0.51265	0.990959	3	15.5912	15.7051	16.2721	10.3463
Q8TD26	CHD6_HUMAN	CHD6	Chromodomain-helicase-DNA-binding protein 6 OS=Homo sapiens OX=9606 GN=CHD6 PE=1 SV=4	305.412	2715	4.9069	2.29481	0.390078	0.990959	3	14.6584	14.8367	14.5592	10.3463
O15431	COPT1_HUMAN	SLC31A1	High affinity copper uptake protein 1 OS=Homo sapiens OX=9606 GN=SLC31A1 PE=1 SV=1	21.091	190	4.88819	2.2893	0.385815	0.990959	3	14.7267	14.7044	10.3463	14.5062
Q96PZ2	F111A_HUMAN	FAM111A	Serine protease FAM111A OS=Homo sapiens OX=9606 GN=FAM111A PE=1 SV=2	70.196	611	4.35565	2.12289	0.424516	0.990959	3	14.9831	14.1369	14.528	10.3463
Q9BTK6	PAGR1_HUMAN	PAGR1	PAXIP1-associated glutamate-rich protein 1 OS=Homo sapiens OX=9606 GN=PAGR1 PE=1 SV=1	27.716	254	4.21393	2.07517	0.489397	0.990959	3	15.1037	14.6612	15.2683	10.3463
Q13105	ZBT17_HUMAN	ZBTB17	Zinc finger and BTB domain-containing protein 17 OS=Homo sapiens OX=9606 GN=ZBTB17 PE=1 SV=3	87.928	803	4.20114	2.07078	0.472927	0.990959	3	14.7734	14.7825	15.0681	10.3463
Q9P1U0	RPA12_HUMAN	POLR1H	DNA-directed RNA polymerase I subunit RPA12 OS=Homo sapiens OX=9606 GN=POLR1H PE=1 SV=1	13.904	126	3.86095	1.94896	0.320065	0.990959	3	13.716	13.8442	10.3463	13.316
Q96SA4	SERC2_HUMAN	SERINC2	Serine incorporator 2 OS=Homo sapiens OX=9606 GN=SERINC2 PE=2 SV=3	50.742	455	3.83241	1.93825	0.432719	0.990959	3	14.1715	14.3718	10.3463	14.3205
Q9NVS2	RT18A_HUMAN	MRPS18A	39S ribosomal protein S18a, mitochondrial OS=Homo sapiens OX=9606 GN=MRPS18A PE=1 SV=1	22.184	196	3.81838	1.93296	0.636628	0.990959	3	16.3187	15.1505	17.257	10.3463
Q9Y4A0	JERKL_HUMAN	JRKL	Jerky protein homolog-like OS=Homo sapiens OX=9606 GN=JRKL PE=2 SV=2	59.912	524	3.69535	1.88571	0.489244	0.990959	3	14.4241	14.5276	14.834	10.3463
O94921	CDK14_HUMAN	CDK14	Cyclin-dependent kinase 14 OS=Homo sapiens OX=9606 GN=CDK14 PE=1 SV=3	53.057	469	3.59076	1.84429	0.573535	0.990959	3	15.7562	13.799	10.3463	15.5204
P52824	DGKQ_HUMAN	DGKQ	Diacylglycerol kinase theta OS=Homo sapiens OX=9606 GN=DGKQ PE=1 SV=2	101.155	942	3.52741	1.81861	0.490055	0.990959	3	14.603	14.0268	14.6463	10.3463
Q13882	PTK6_HUMAN	PTK6	Protein-tyrosine kinase 6 OS=Homo sapiens OX=9606 GN=PTK6 PE=1 SV=1	51.834	451	3.40502	1.76766	0.580404	0.990959	3	14.0925	15.3863	15.5972	10.3463
Q9NRY2	SOSSC_HUMAN	INIP	SOSS complex subunit C OS=Homo sapiens OX=9606 GN=INIP PE=1 SV=1	11.425	104	3.25153	1.70112	0.600493	0.990959	4	18.7819	13.4969	13.6408	15.2357
Q96JN0	LCOR_HUMAN	LCOR	Ligand-dependent corepressor OS=Homo sapiens OX=9606 GN=LCOR PE=1 SV=2	47.007	433	3.16033	1.66007	0.499721	0.990959	3	14.1017	13.9723	14.4076	10.3463
Q8N5C8	TAB3_HUMAN	TAB3	TGF-beta-activated kinase 1 and MAP3K7-binding protein 3 OS=Homo sapiens OX=9606 GN=TAB3 PE=1 SV=3	78.653	712	3.07438	1.6203	0.566539	0.990959	3	15.1814	12.973	10.3463	14.5675
O60906	NSMA_HUMAN	SMPD2	Sphingomyelin phosphodiesterase 2 OS=Homo sapiens OX=9606 GN=SMPD2 PE=1 SV=2	47.646	423	3.01837	1.59377	0.295113	0.990959	4	15.4642	15.5182	12.7637	15.0311
Q9ULC8	ZDHC8_HUMAN	ZDHHC8	Palmitoyltransferase ZDHHC8 OS=Homo sapiens OX=9606 GN=ZDHHC8 PE=1 SV=3	81.443	765	2.75198	1.46047	0.328947	0.990959	4	18.6937	18.7664	16.1292	18.41
P37840	SYUA_HUMAN	SNCA	Alpha-synuclein OS=Homo sapiens OX=9606 GN=SNCA PE=1 SV=1	14.46	140	2.72565	1.4466	0.243749	0.990959	4	15.2369	14.9524	14.5215	12.7746
Q9P0S9	TM14C_HUMAN	TMEM14C	Transmembrane protein 14C OS=Homo sapiens OX=9606 GN=TMEM14C PE=1 SV=1	11.565	112	2.69247	1.42893	0.375907	0.990959	4	19.4582	19.8499	16.9753	19.4748
Q9Y241	HIG1A_HUMAN	HIGD1A	HIG1 domain family member 1A, mitochondrial OS=Homo sapiens OX=9606 GN=HIGD1A PE=1 SV=1	10.143	93	2.63569	1.39818	0.53391	0.990959	4	18.6907	19.3769	15.7905	19.4807
P41220	RGS2_HUMAN	RGS2	Regulator of G-protein signaling 2 OS=Homo sapiens OX=9606 GN=RGS2 PE=1 SV=1	24.382	211	2.63023	1.39519	0.0196111	0.990959	4	17.4244	17.7037	16.0281	16.3096
P17036	ZNF3_HUMAN	ZNF3	Zinc finger protein 3 OS=Homo sapiens OX=9606 GN=ZNF3 PE=1 SV=3	50.916	446	2.56536	1.35916	0.327916	0.990959	4	14.6069	14.6529	12.2121	14.3294
Q9Y3V2	RWDD3_HUMAN	RWDD3	RWD domain-containing protein 3 OS=Homo sapiens OX=9606 GN=RWDD3 PE=1 SV=4	30.544	267	2.53254	1.34058	0.653791	0.990959	3	14.9372	13.3092	15.219	10.3463
P11831	SRF_HUMAN	SRF	Serum response factor OS=Homo sapiens OX=9606 GN=SRF PE=1 SV=1	51.593	508	2.4981	1.32083	0.385686	0.990959	4	16.3097	16.6038	16.3265	13.9453
O75394	RM33_HUMAN	MRPL33	39S ribosomal protein L33, mitochondrial OS=Homo sapiens OX=9606 GN=MRPL33 PE=1 SV=1	7.619	65	2.4158	1.2725	0.403567	0.990959	4	19.5042	18.4816	16.6228	18.8181
Q8N4Q0	PTGR3_HUMAN	ZADH2	Prostaglandin reductase 3 OS=Homo sapiens OX=9606 GN=ZADH2 PE=1 SV=1	40.14	377	2.37876	1.25021	0.418958	0.990959	3	12.1022	13.2731	10.3463	12.5286
Q8IYS0	ASTRC_HUMAN	GRAMD1C	Protein Aster-C OS=Homo sapiens OX=9606 GN=GRAMD1C PE=1 SV=2	76.035	662	2.28961	1.1951	0.537336	0.990959	4	20.4897	19.2256	17.1717	20.1534
Q9BT40	INP5K_HUMAN	INPP5K	Inositol polyphosphate 5-phosphatase K OS=Homo sapiens OX=9606 GN=INPP5K PE=1 SV=3	51.09	448	2.28256	1.19065	0.310289	0.990959	4	17.0338	15.4772	14.6459	15.4838
P62072	TIM10_HUMAN	TIMM10	Mitochondrial import inner membrane translocase subunit Tim10 OS=Homo sapiens OX=9606 GN=TIMM10 PE=1 SV=1	10.333	90	2.23101	1.1577	0.319785	0.990959	4	20.9513	20.5752	18.7436	20.4674
Q8IUR5	TMTC1_HUMAN	TMTC1	Protein O-mannosyl-transferase TMTC1 OS=Homo sapiens OX=9606 GN=TMTC1 PE=1 SV=3	98.847	882	2.20012	1.13758	0.228874	0.990959	4	15.6362	15.4667	15.0726	13.7551
Q14517	FAT1_HUMAN	FAT1	Protocadherin Fat 1 OS=Homo sapiens OX=9606 GN=FAT1 PE=1 SV=2	506.273	4588	2.1846	1.12737	0.0870174	0.990959	4	16.5302	15.8888	14.927	15.2373
Q9NWQ4	GPT2L_HUMAN	GPATCH2L	G patch domain-containing protein 2-like OS=Homo sapiens OX=9606 GN=GPATCH2L PE=1 SV=3	54.26	482	2.17545	1.12131	0.171065	0.990959	4	15.4635	14.6895	13.5857	14.3246
P18847	ATF3_HUMAN	ATF3	Cyclic AMP-dependent transcription factor ATF-3 OS=Homo sapiens OX=9606 GN=ATF3 PE=1 SV=2	20.576	181	2.14772	1.1028	0.0656466	0.990959	4	15.5541	15.2655	14.0469	14.567
Q5EBL8	PDZ11_HUMAN	PDZD11	PDZ domain-containing protein 11 OS=Homo sapiens OX=9606 GN=PDZD11 PE=1 SV=2	16.131	140	2.11738	1.08228	0.344698	0.990959	4	19.5407	17.928	18.0099	17.2943
Q99551	MTEF1_HUMAN	MTERF1	Transcription termination factor 1, mitochondrial OS=Homo sapiens OX=9606 GN=MTERF1 PE=1 SV=1	45.778	399	2.09764	1.06877	0.0361948	0.990959	4	16.5986	16.5977	15.3203	15.7384
Q9P0M6	H2AW_HUMAN	MACROH2A2	Core histone macro-H2A.2 OS=Homo sapiens OX=9606 GN=MACROH2A2 PE=1 SV=3	40.058	372	2.06109	1.0434	0.383752	0.990959	4	21.0697	20.8769	18.992	20.8679
A5D8V6	VP37C_HUMAN	VPS37C	Vacuolar protein sorting-associated protein 37C OS=Homo sapiens OX=9606 GN=VPS37C PE=1 SV=2	38.659	355	2.05319	1.03787	0.235154	0.990959	4	19.754	18.919	18.7545	17.8428
O43542	XRCC3_HUMAN	XRCC3	DNA repair protein XRCC3 OS=Homo sapiens OX=9606 GN=XRCC3 PE=1 SV=1	37.85	346	2.03832	1.02738	0.166897	0.990959	4	17.0813	17.97	16.3108	16.6858
Q8TCC3	RM30_HUMAN	MRPL30	39S ribosomal protein L30, mitochondrial OS=Homo sapiens OX=9606 GN=MRPL30 PE=1 SV=1	18.546	161	2.03391	1.02426	0.33899	0.990959	4	19.1192	18.8173	18.7522	17.1358
O75817	POP7_HUMAN	POP7	Ribonuclease P protein subunit p20 OS=Homo sapiens OX=9606 GN=POP7 PE=1 SV=2	15.651	140	2.03193	1.02285	0.298515	0.990959	4	18.4097	18.4886	16.6926	18.1601
P31270	HXA11_HUMAN	HOXA11	Homeobox protein Hox-A11 OS=Homo sapiens OX=9606 GN=HOXA11 PE=2 SV=2	34.486	313	2.01961	1.01408	0.00338872	0.823132	4	15.5612	15.6491	14.5514	14.6307
P45983	MK08_HUMAN	MAPK8	Mitogen-activated protein kinase 8 OS=Homo sapiens OX=9606 GN=MAPK8 PE=1 SV=2	48.296	427	2.01908	1.0137	0.357682	0.990959	4	17.5393	17.5672	15.6844	17.3947
Q13495	MAMD1_HUMAN	MAMLD1	Mastermind-like domain-containing protein 1 OS=Homo sapiens OX=9606 GN=MAMLD1 PE=1 SV=2	83.231	774	2.01824	1.0131	0.209492	0.990959	4	15.4677	15.143	13.7615	14.823
Q92743	HTRA1_HUMAN	HTRA1	Serine protease HTRA1 OS=Homo sapiens OX=9606 GN=HTRA1 PE=1 SV=1	51.287	480	2.00455	1.00328	0.081798	0.990959	4	14.3455	14.7884	13.775	13.3524
P24158	PRTN3_HUMAN	PRTN3	Myeloblastin OS=Homo sapiens OX=9606 GN=PRTN3 PE=1 SV=3	27.807	256	2.00416	1.00299	0.0219456	0.990959	4	17.8931	18.1892	17.0684	17.008
Q8N5Z0	AADAT_HUMAN	AADAT	Kynurenine/alpha-aminoadipate aminotransferase, mitochondrial OS=Homo sapiens OX=9606 GN=AADAT PE=1 SV=2	47.352	425	1.98987	0.992672	0.220325	0.990959	4	17.3236	16.7114	15.5514	16.4983
Q16760	DGKD_HUMAN	DGKD	Diacylglycerol kinase delta OS=Homo sapiens OX=9606 GN=DGKD PE=1 SV=4	134.526	1214	1.9828	0.987538	0.429892	0.990959	4	14.2427	13.329	13.6949	11.9017
Q13093	PAFA_HUMAN	PLA2G7	Platelet-activating factor acetylhydrolase OS=Homo sapiens OX=9606 GN=PLA2G7 PE=1 SV=1	50.077	441	1.96891	0.9774	0.278463	0.990959	4	16.963	17.2108	15.4579	16.761
Q8NBA8	DTWD2_HUMAN	DTWD2	tRNA-uridine aminocarboxypropyltransferase 2 OS=Homo sapiens OX=9606 GN=DTWD2 PE=1 SV=1	33.416	298	1.95906	0.970162	0.0668117	0.990959	4	16.8452	17.034	15.7227	16.2162
Q9UJT1	TBD_HUMAN	TUBD1	Tubulin delta chain OS=Homo sapiens OX=9606 GN=TUBD1 PE=2 SV=2	51.034	453	1.9398	0.955905	0.233391	0.990959	4	15.0868	15.7173	14.9164	13.9759
Q8ND25	ZNRF1_HUMAN	ZNRF1	E3 ubiquitin-protein ligase ZNRF1 OS=Homo sapiens OX=9606 GN=ZNRF1 PE=1 SV=2	23.783	227	1.92946	0.9482	0.191027	0.990959	4	15.4959	15.1813	14.8515	13.9293
Q6UB99	ANR11_HUMAN	ANKRD11	Ankyrin repeat domain-containing protein 11 OS=Homo sapiens OX=9606 GN=ANKRD11 PE=1 SV=3	297.913	2663	1.91195	0.935047	0.0560385	0.990959	4	16.1121	16.4123	15.503	15.1514
Q15776	ZKSC8_HUMAN	ZKSCAN8	Zinc finger protein with KRAB and SCAN domains 8 OS=Homo sapiens OX=9606 GN=ZKSCAN8 PE=1 SV=2	65.816	578	1.9097	0.933349	0.399287	0.990959	4	16.7101	16.2409	14.6957	16.3885
Q96I36	COX14_HUMAN	COX14	Cytochrome c oxidase assembly protein COX14 OS=Homo sapiens OX=9606 GN=COX14 PE=1 SV=1	6.6	57	1.90839	0.932359	0.416631	0.990959	4	19.0413	18.0873	16.8477	18.4162
O14713	ITBP1_HUMAN	ITGB1BP1	Integrin beta-1-binding protein 1 OS=Homo sapiens OX=9606 GN=ITGB1BP1 PE=1 SV=1	21.782	200	1.9031	0.928348	0.100424	0.990959	4	16.6408	16.6263	15.3866	16.0238
Q96BR1	SGK3_HUMAN	SGK3	Serine/threonine-protein kinase Sgk3 OS=Homo sapiens OX=9606 GN=SGK3 PE=1 SV=1	57.108	496	1.90104	0.926786	0.0759994	0.990959	4	15.5275	15.765	14.4757	14.9633
Q9GZU3	TM39B_HUMAN	TMEM39B	Transmembrane protein 39B OS=Homo sapiens OX=9606 GN=TMEM39B PE=1 SV=1	56.274	492	1.89918	0.925378	0.539671	0.990959	4	14.0002	13.1474	13.8361	11.4608
Q9NZV1	CRIM1_HUMAN	CRIM1	Cysteine-rich motor neuron 1 protein OS=Homo sapiens OX=9606 GN=CRIM1 PE=1 SV=1	113.738	1036	1.88381	0.913656	0.220141	0.990959	4	15.8456	14.8186	14.4905	14.3465
P13284	GILT_HUMAN	IFI30	Gamma-interferon-inducible lysosomal thiol reductase OS=Homo sapiens OX=9606 GN=IFI30 PE=1 SV=3	27.964	250	1.86965	0.902765	0.0152421	0.990959	4	16.8878	16.7158	15.972	15.8261
Q9NRW3	ABC3C_HUMAN	APOBEC3C	DNA dC->dU-editing enzyme APOBEC-3C OS=Homo sapiens OX=9606 GN=APOBEC3C PE=1 SV=2	22.826	190	1.84414	0.882947	0.00938401	0.990959	4	18.4301	18.5268	17.5242	17.6668
Q8NDH3	PEPL1_HUMAN	NPEPL1	Probable aminopeptidase NPEPL1 OS=Homo sapiens OX=9606 GN=NPEPL1 PE=1 SV=3	55.861	523	1.84254	0.881697	0.29942	0.990959	4	18.481	17.9738	16.7635	17.9279
Q5D0E6	DALD3_HUMAN	DALRD3	DALR anticodon-binding domain-containing protein 3 OS=Homo sapiens OX=9606 GN=DALRD3 PE=1 SV=2	59.363	543	1.83977	0.879523	0.462341	0.990959	4	17.2588	16.9174	17.1688	15.2483
Q04727	TLE4_HUMAN	TLE4	Transducin-like enhancer protein 4 OS=Homo sapiens OX=9606 GN=TLE4 PE=1 SV=3	83.755	773	1.8267	0.86924	0.482256	0.990959	4	15.7428	15.5945	13.7865	15.8124
Q5VV52	ZN691_HUMAN	ZNF691	Zinc finger protein 691 OS=Homo sapiens OX=9606 GN=ZNF691 PE=1 SV=2	35.81	315	1.80884	0.855067	0.757856	0.99164	3	13.4429	13.7926	10.3463	15.179
Q9NXA8	SIR5_HUMAN	SIRT5	NAD-dependent protein deacylase sirtuin-5, mitochondrial OS=Homo sapiens OX=9606 GN=SIRT5 PE=1 SV=2	33.881	310	1.79841	0.846723	0.176386	0.990959	4	17.5687	17.5037	16.2784	17.1005
Q99595	TI17A_HUMAN	TIMM17A	Mitochondrial import inner membrane translocase subunit Tim17-A OS=Homo sapiens OX=9606 GN=TIMM17A PE=1 SV=1	18.024	171	1.79397	0.843153	0.0662115	0.990959	4	17.9883	17.6075	16.8285	17.0809
Q8NHZ8	CDC26_HUMAN	CDC26	Anaphase-promoting complex subunit CDC26 OS=Homo sapiens OX=9606 GN=CDC26 PE=1 SV=1	9.777	85	1.79094	0.840714	0.0116851	0.990959	4	20.4081	20.2309	19.4552	19.5024
Q96LR5	UB2E2_HUMAN	UBE2E2	Ubiquitin-conjugating enzyme E2 E2 OS=Homo sapiens OX=9606 GN=UBE2E2 PE=1 SV=1	22.255	201	1.78444	0.83547	0.118291	0.990959	4	13.1296	13.7313	12.692	12.498
O43829	ZBT14_HUMAN	ZBTB14	Zinc finger and BTB domain-containing protein 14 OS=Homo sapiens OX=9606 GN=ZBTB14 PE=1 SV=2	50.956	449	1.78062	0.832382	0.055188	0.990959	4	15.8745	16.2739	15.1996	15.284
P62854	RS26_HUMAN	RPS26	40S ribosomal protein S26 OS=Homo sapiens OX=9606 GN=RPS26 PE=1 SV=3	13.015	115	1.77679	0.829269	0.350225	0.990959	4	20.1788	20.7946	19.0444	20.2704
Q8IZV5	RDH10_HUMAN	RDH10	Retinol dehydrogenase 10 OS=Homo sapiens OX=9606 GN=RDH10 PE=1 SV=1	38.087	341	1.76334	0.81831	0.464945	0.990959	4	19.1837	18.9811	17.3561	19.1721
Q9NTX7	RN146_HUMAN	RNF146	E3 ubiquitin-protein ligase RNF146 OS=Homo sapiens OX=9606 GN=RNF146 PE=1 SV=1	38.95	359	1.75772	0.813704	0.110804	0.990959	4	16.6482	16.2478	15.8524	15.4162
Q99643	C560_HUMAN	SDHC	Succinate dehydrogenase cytochrome b560 subunit, mitochondrial OS=Homo sapiens OX=9606 GN=SDHC PE=1 SV=1	18.61	169	1.74661	0.804559	0.599005	0.990959	4	18.638	17.9685	18.7545	16.2428
O14925	TIM23_HUMAN	TIMM23	Mitochondrial import inner membrane translocase subunit Tim23 OS=Homo sapiens OX=9606 GN=TIMM23 PE=1 SV=1	21.943	209	1.74173	0.80052	0.0785136	0.990959	4	20.4156	20.369	19.8293	19.3543
P51825	AFF1_HUMAN	AFF1	AF4/FMR2 family member 1 OS=Homo sapiens OX=9606 GN=AFF1 PE=1 SV=1	131.422	1210	1.73876	0.798063	0.0741329	0.990959	4	18.5385	18.8938	18.0647	17.7715
Q9UMX3	BOK_HUMAN	BOK	Bcl-2-related ovarian killer protein OS=Homo sapiens OX=9606 GN=BOK PE=1 SV=1	23.28	212	1.73746	0.796981	0.172828	0.990959	4	15.0618	14.5973	14.3369	13.7282
Q9NZI7	UBIP1_HUMAN	UBP1	Upstream-binding protein 1 OS=Homo sapiens OX=9606 GN=UBP1 PE=1 SV=1	60.491	540	1.73172	0.792206	0.230987	0.990959	4	18.7859	19.0692	17.6918	18.5789
Q9Y4F3	MARF1_HUMAN	MARF1	Meiosis regulator and mRNA stability factor 1 OS=Homo sapiens OX=9606 GN=MARF1 PE=1 SV=6	192.859	1742	1.73098	0.791587	0.260451	0.990959	4	17.3131	17.0405	15.8943	16.8761
Q9Y2I7	FYV1_HUMAN	PIKFYVE	1-phosphatidylinositol 3-phosphate 5-kinase OS=Homo sapiens OX=9606 GN=PIKFYVE PE=1 SV=3	237.136	2098	1.7291	0.790025	0.0129581	0.990959	4	16.9003	16.7426	15.9863	16.0765
Q13563	PKD2_HUMAN	PKD2	Polycystin-2 OS=Homo sapiens OX=9606 GN=PKD2 PE=1 SV=3	109.691	968	1.72704	0.788303	0.297135	0.990959	4	15.9675	15.9539	14.6083	15.7365
Q7LFL8	CXXC5_HUMAN	CXXC5	CXXC-type zinc finger protein 5 OS=Homo sapiens OX=9606 GN=CXXC5 PE=1 SV=1	32.977	322	1.72492	0.78653	0.173727	0.990959	4	14.7541	15.5058	14.2936	14.3933
Q14CN4	K2C72_HUMAN	KRT72	Keratin, type II cytoskeletal 72 OS=Homo sapiens OX=9606 GN=KRT72 PE=1 SV=2	55.877	511	1.71928	0.781804	0.0301912	0.990959	4	17.2151	16.9397	16.2767	16.3144
Q9H2C2	ARV1_HUMAN	ARV1	Protein ARV1 OS=Homo sapiens OX=9606 GN=ARV1 PE=1 SV=1	31.052	271	1.71686	0.779772	0.245728	0.990959	4	16.7445	17.4431	15.9848	16.6432
P63279	UBC9_HUMAN	UBE2I	SUMO-conjugating enzyme UBC9 OS=Homo sapiens OX=9606 GN=UBE2I PE=1 SV=1	18.007	158	1.71136	0.775147	0.323825	0.990959	4	24.7108	24.1095	23.119	24.151
Q8NB91	FANCB_HUMAN	FANCB	Fanconi anemia group B protein OS=Homo sapiens OX=9606 GN=FANCB PE=1 SV=1	97.726	859	1.70665	0.771166	0.134993	0.990959	4	17.6971	17.4732	16.5181	17.1098
A8MWD9	RUXGL_HUMAN	SNRPGP15	Putative small nuclear ribonucleoprotein G-like protein 15 OS=Homo sapiens OX=9606 GN=SNRPGP15 PE=5 SV=2	8.544	76	1.69754	0.76345	0.357877	0.990959	4	24.414	24.0414	22.8473	24.0812
Q9NQG6	MID51_HUMAN	MIEF1	Mitochondrial dynamics protein MID51 OS=Homo sapiens OX=9606 GN=MIEF1 PE=1 SV=1	51.293	463	1.69315	0.759709	0.430962	0.990959	4	17.5066	17.9934	16.2532	17.7275
P24311	COX7B_HUMAN	COX7B	Cytochrome c oxidase subunit 7B, mitochondrial OS=Homo sapiens OX=9606 GN=COX7B PE=1 SV=2	9.161	80	1.67996	0.748423	0.308323	0.990959	4	22.7111	22.715	21.4121	22.5172
O95149	SPN1_HUMAN	SNUPN	Snurportin-1 OS=Homo sapiens OX=9606 GN=SNUPN PE=1 SV=1	41.143	360	1.67055	0.740319	0.118248	0.990959	4	18.9263	19.017	17.955	18.5077
Q15011	HERP1_HUMAN	HERPUD1	Homocysteine-responsive endoplasmic reticulum-resident ubiquitin-like domain member 1 protein OS=Homo sapiens OX=9606 GN=HERPUD1 PE=1 SV=1	43.72	391	1.67024	0.740059	0.0948997	0.990959	4	17.655	17.2638	16.8682	16.5705
Q8N8J7	F241A_HUMAN	FAM241A	Uncharacterized protein FAM241A OS=Homo sapiens OX=9606 GN=FAM241A PE=2 SV=2	14.653	132	1.66359	0.734304	0.360945	0.990959	4	18.4845	17.7407	16.876	17.8805
O43504	LTOR5_HUMAN	LAMTOR5	Ragulator complex protein LAMTOR5 OS=Homo sapiens OX=9606 GN=LAMTOR5 PE=1 SV=1	9.614	91	1.65696	0.728537	0.167662	0.990959	4	19.5828	18.8967	18.5146	18.5078
Q9BQA9	CYBC1_HUMAN	CYBC1	Cytochrome b-245 chaperone 1 OS=Homo sapiens OX=9606 GN=CYBC1 PE=1 SV=1	20.774	187	1.64543	0.718465	0.611504	0.990959	4	16.8087	16.7427	17.2617	14.8527
P68402	PA1B2_HUMAN	PAFAH1B2	Platelet-activating factor acetylhydrolase IB subunit alpha2 OS=Homo sapiens OX=9606 GN=PAFAH1B2 PE=1 SV=1	25.569	229	1.64202	0.715469	0.358659	0.990959	4	22.0682	21.9264	20.6807	21.8829
Q9NX76	CKLF6_HUMAN	CMTM6	CKLF-like MARVEL transmembrane domain-containing protein 6 OS=Homo sapiens OX=9606 GN=CMTM6 PE=1 SV=1	20.419	183	1.64034	0.713995	0.26276	0.990959	4	18.0463	17.6423	16.7141	17.5466
Q969G6	RIFK_HUMAN	RFK	Riboflavin kinase OS=Homo sapiens OX=9606 GN=RFK PE=1 SV=2	17.623	155	1.63968	0.713418	0.0323385	0.990959	4	18.8079	18.6331	17.9089	18.1053
Q29980	MICB_HUMAN	MICB	MHC class I polypeptide-related sequence B OS=Homo sapiens OX=9606 GN=MICB PE=1 SV=2	42.575	383	1.6357	0.709906	0.328412	0.990959	4	19.4106	19.4271	18.1552	19.2627
Q96FK6	WDR89_HUMAN	WDR89	WD repeat-containing protein 89 OS=Homo sapiens OX=9606 GN=WDR89 PE=2 SV=1	43.215	387	1.6306	0.705405	0.262606	0.990959	4	17.4428	17.155	17.0271	16.1598
Q9HB20	PKHA3_HUMAN	PLEKHA3	Pleckstrin homology domain-containing family A member 3 OS=Homo sapiens OX=9606 GN=PLEKHA3 PE=1 SV=2	33.861	300	1.6287	0.703721	0.357848	0.990959	4	15.8309	15.8446	15.728	14.54
O15504	NUP42_HUMAN	NUP42	Nucleoporin NUP42 OS=Homo sapiens OX=9606 GN=NUP42 PE=1 SV=1	44.872	423	1.62487	0.700324	0.328973	0.990959	4	19.4533	19.6028	19.3698	18.2857
Q9NX05	F120C_HUMAN	FAM120C	Constitutive coactivator of PPAR-gamma-like protein 2 OS=Homo sapiens OX=9606 GN=FAM120C PE=1 SV=3	120.588	1096	1.62447	0.699968	0.213695	0.990959	4	17.0411	17.0398	15.9516	16.7294
Q4ADV7	RIC1_HUMAN	RIC1	Guanine nucleotide exchange factor subunit RIC1 OS=Homo sapiens OX=9606 GN=RIC1 PE=1 SV=2	159.301	1423	1.62155	0.697378	0.240451	0.990959	4	16.5914	16.0313	15.93	15.2979
P24863	CCNC_HUMAN	CCNC	Cyclin-C OS=Homo sapiens OX=9606 GN=CCNC PE=1 SV=2	33.243	283	1.62072	0.696638	0.475926	0.990959	4	17.5039	17.0768	15.8222	17.3652
Q8N488	RYBP_HUMAN	RYBP	RING1 and YY1-binding protein OS=Homo sapiens OX=9606 GN=RYBP PE=1 SV=2	24.822	228	1.61071	0.687695	0.0794928	0.990959	4	15.8129	15.9044	15.3722	14.9697
Q8N9M5	TM102_HUMAN	TMEM102	Transmembrane protein 102 OS=Homo sapiens OX=9606 GN=TMEM102 PE=1 SV=1	54.175	508	1.61032	0.687346	0.373472	0.990959	4	14.9711	13.8265	13.5165	13.9065
Q9UH92	MLX_HUMAN	MLX	Max-like protein X OS=Homo sapiens OX=9606 GN=MLX PE=1 SV=2	33.3	298	1.60775	0.685047	0.0998707	0.990959	4	16.251	16.6083	15.8964	15.5928
Q8N511	TM199_HUMAN	TMEM199	Transmembrane protein 199 OS=Homo sapiens OX=9606 GN=TMEM199 PE=1 SV=1	23.13	208	1.60574	0.683237	0.554616	0.990959	4	18.8769	18.5643	17.0788	18.9959
Q16600	ZN239_HUMAN	ZNF239	Zinc finger protein 239 OS=Homo sapiens OX=9606 GN=ZNF239 PE=1 SV=3	51.591	458	1.60504	0.682608	0.427204	0.990959	4	16.5201	16.0301	16.2383	14.9467
Q9H8M5	CNNM2_HUMAN	CNNM2	Metal transporter CNNM2 OS=Homo sapiens OX=9606 GN=CNNM2 PE=1 SV=2	96.623	875	1.60029	0.678334	0.602296	0.990959	4	14.3302	15.5032	15.1768	13.3
Q96KN1	LRAT2_HUMAN	LRATD2	Protein LRATD2 OS=Homo sapiens OX=9606 GN=LRATD2 PE=1 SV=1	34.474	310	1.59946	0.677582	0.0767292	0.990959	4	17.2886	17.6263	16.6739	16.8858
Q9Y3D2	MSRB2_HUMAN	MSRB2	Methionine-R-sulfoxide reductase B2, mitochondrial OS=Homo sapiens OX=9606 GN=MSRB2 PE=1 SV=2	19.536	182	1.59537	0.673894	0.553745	0.990959	4	16.6058	16.9648	17.05	15.1728
Q8TF46	DI3L1_HUMAN	DIS3L	DIS3-like exonuclease 1 OS=Homo sapiens OX=9606 GN=DIS3L PE=1 SV=2	120.787	1054	1.59427	0.672895	0.368751	0.990959	4	15.5065	15.8678	15.5703	14.4583
Q9H3H5	GPT_HUMAN	DPAGT1	UDP-N-acetylglucosamine--dolichyl-phosphate N-acetylglucosaminephosphotransferase OS=Homo sapiens OX=9606 GN=DPAGT1 PE=1 SV=2	46.09	408	1.58881	0.667946	0.382947	0.990959	4	19.7922	19.3972	18.3577	19.4958
P39210	MPV17_HUMAN	MPV17	Protein Mpv17 OS=Homo sapiens OX=9606 GN=MPV17 PE=1 SV=1	19.733	176	1.5858	0.665215	0.200508	0.990959	4	17.393	16.9886	16.2357	16.8154
P82912	RT11_HUMAN	MRPS11	28S ribosomal protein S11, mitochondrial OS=Homo sapiens OX=9606 GN=MRPS11 PE=1 SV=2	20.616	194	1.58511	0.664581	0.248182	0.990959	4	18.5791	18.7491	17.5962	18.4028
Q9Y2R5	RT17_HUMAN	MRPS17	28S ribosomal protein S17, mitochondrial OS=Homo sapiens OX=9606 GN=MRPS17 PE=1 SV=1	14.502	130	1.57102	0.651697	0.199045	0.990959	4	19.6836	19.5705	18.6356	19.3152
Q6IPR3	TYW3_HUMAN	TYW3	tRNA wybutosine-synthesizing protein 3 homolog OS=Homo sapiens OX=9606 GN=TYW3 PE=1 SV=2	29.794	259	1.56586	0.646954	0.0887734	0.990959	4	17.252	17.3145	16.8407	16.4319
P78368	KC1G2_HUMAN	CSNK1G2	Casein kinase I isoform gamma-2 OS=Homo sapiens OX=9606 GN=CSNK1G2 PE=1 SV=1	47.457	415	1.56452	0.645719	0.696979	0.990959	4	17.3056	16.3753	14.8362	17.5532
Q9H4F1	SIA7D_HUMAN	ST6GALNAC4	Alpha-N-acetyl-neuraminyl-2,3-beta-galactosyl-1,3-N-acetyl-galactosaminide alpha-2,6-sialyltransferase OS=Homo sapiens OX=9606 GN=ST6GALNAC4 PE=2 SV=2	34.201	302	1.55206	0.63418	0.296897	0.990959	4	18.1139	17.9704	16.9601	17.8558
O75915	PRAF3_HUMAN	ARL6IP5	PRA1 family protein 3 OS=Homo sapiens OX=9606 GN=ARL6IP5 PE=1 SV=1	21.615	188	1.55139	0.633565	0.418106	0.990959	4	22.6937	22.6166	21.3967	22.6465
Q9P0T4	ZN581_HUMAN	ZNF581	Zinc finger protein 581 OS=Homo sapiens OX=9606 GN=ZNF581 PE=1 SV=1	22.01	197	1.55132	0.633493	0.323419	0.990959	4	17.338	16.9857	16.0737	16.9829
Q86X95	CIR1_HUMAN	CIR1	Corepressor interacting with RBPJ 1 OS=Homo sapiens OX=9606 GN=CIR1 PE=1 SV=1	52.313	450	1.55074	0.632955	0.00613517	0.990959	4	15.8056	15.7666	15.1073	15.199
Q9H1J1	REN3A_HUMAN	UPF3A	Regulator of nonsense transcripts 3A OS=Homo sapiens OX=9606 GN=UPF3A PE=1 SV=1	54.696	476	1.55034	0.632585	0.0523165	0.990959	4	16.5593	16.4176	15.9889	15.7229
P21583	SCF_HUMAN	KITLG	Kit ligand OS=Homo sapiens OX=9606 GN=KITLG PE=1 SV=1	30.899	273	1.5441	0.62677	0.711348	0.990959	4	19.0333	16.5956	16.3658	18.0095
Q96AB6	NTAN1_HUMAN	NTAN1	Protein N-terminal asparagine amidohydrolase OS=Homo sapiens OX=9606 GN=NTAN1 PE=1 SV=3	34.677	310	1.54334	0.626056	0.408486	0.990959	4	17.4637	18.5132	17.6604	17.0644
P23610	HAP40_HUMAN	F8A1	40-kDa huntingtin-associated protein OS=Homo sapiens OX=9606 GN=F8A1 PE=1 SV=2	39.103	371	1.54232	0.625101	0.328801	0.990959	4	18.5288	18.2613	17.3004	18.2394
Q96CP7	TLCD1_HUMAN	TLCD1	TLC domain-containing protein 1 OS=Homo sapiens OX=9606 GN=TLCD1 PE=1 SV=1	28.548	247	1.53752	0.62061	0.294928	0.990959	4	18.3035	18.1417	17.1681	18.0359
Q96GE9	DMAC1_HUMAN	DMAC1	Distal membrane-arm assembly complex protein 1 OS=Homo sapiens OX=9606 GN=DMAC1 PE=1 SV=1	12.257	116	1.53618	0.619349	0.44318	0.990959	4	18.4715	18.4093	17.1685	18.4736
Q9UGK8	SRGEF_HUMAN	SERGEF	Secretion-regulating guanine nucleotide exchange factor OS=Homo sapiens OX=9606 GN=SERGEF PE=1 SV=2	48.981	458	1.53252	0.615903	0.319265	0.990959	4	16.9128	16.2343	16.281	15.6343
P55061	BI1_HUMAN	TMBIM6	Bax inhibitor 1 OS=Homo sapiens OX=9606 GN=TMBIM6 PE=1 SV=2	26.538	237	1.53217	0.61558	0.224578	0.990959	4	17.1581	17.8481	16.806	16.969
Q9Y5W9	SNX11_HUMAN	SNX11	Sorting nexin-11 OS=Homo sapiens OX=9606 GN=SNX11 PE=1 SV=2	30.433	270	1.53099	0.61446	0.0987351	0.990959	4	16.9179	16.6934	16.3673	16.015
O14972	VP26C_HUMAN	VPS26C	Vacuolar protein sorting-associated protein 26C OS=Homo sapiens OX=9606 GN=VPS26C PE=1 SV=1	33.01	297	1.52918	0.612763	0.239871	0.990959	4	15.6942	15.9919	14.8911	15.5694
Q12893	TM115_HUMAN	TMEM115	Transmembrane protein 115 OS=Homo sapiens OX=9606 GN=TMEM115 PE=1 SV=1	38.197	351	1.52857	0.612185	0.530551	0.990959	4	19.2715	18.9086	17.6842	19.2716
Q01415	GALK2_HUMAN	GALK2	N-acetylgalactosamine kinase OS=Homo sapiens OX=9606 GN=GALK2 PE=1 SV=1	50.378	458	1.52833	0.611957	0.320597	0.990959	4	18.5333	18.0511	17.2799	18.0806
Q96EK6	GNA1_HUMAN	GNPNAT1	Glucosamine 6-phosphate N-acetyltransferase OS=Homo sapiens OX=9606 GN=GNPNAT1 PE=1 SV=1	20.749	184	1.52251	0.606449	0.520356	0.990959	4	19.9624	20.0307	18.6064	20.1739
Q96JC9	EAF1_HUMAN	EAF1	ELL-associated factor 1 OS=Homo sapiens OX=9606 GN=EAF1 PE=1 SV=1	29.042	268	1.52076	0.604792	0.460511	0.990959	4	17.2515	17.5713	16.1586	17.4546
Q9NQH7	XPP3_HUMAN	XPNPEP3	Xaa-Pro aminopeptidase 3 OS=Homo sapiens OX=9606 GN=XPNPEP3 PE=1 SV=1	57.034	507	1.5167	0.600937	0.440783	0.990959	4	23.3309	22.0975	21.985	22.2415
Q9Y2D0	CAH5B_HUMAN	CA5B	Carbonic anhydrase 5B, mitochondrial OS=Homo sapiens OX=9606 GN=CA5B PE=1 SV=1	36.434	317	1.51433	0.598679	0.262497	0.990959	4	19.6889	19.5733	18.6491	19.4157
P37059	DHB2_HUMAN	HSD17B2	17-beta-hydroxysteroid dehydrogenase type 2 OS=Homo sapiens OX=9606 GN=HSD17B2 PE=1 SV=1	42.785	387	1.50866	0.593271	0.235008	0.990959	4	17.4586	17.2807	17.1182	16.4346
O75030	MITF_HUMAN	MITF	Microphthalmia-associated transcription factor OS=Homo sapiens OX=9606 GN=MITF PE=1 SV=2	58.795	526	1.50866	0.593271	0.294662	0.990959	4	18.656	18.3994	17.5328	18.336
Q15048	LRC14_HUMAN	LRRC14	Leucine-rich repeat-containing protein 14 OS=Homo sapiens OX=9606 GN=LRRC14 PE=1 SV=1	54.513	493	1.50597	0.590695	0.225302	0.990959	4	17.5117	16.8816	16.4756	16.7363
Q7Z3B0	SIM15_HUMAN	SMIM15	Small integral membrane protein 15 OS=Homo sapiens OX=9606 GN=SMIM15 PE=3 SV=1	8.625	74	1.50497	0.589738	0.257806	0.990959	4	16.42	15.9996	15.3077	15.9325
Q96FL8	S47A1_HUMAN	SLC47A1	Multidrug and toxin extrusion protein 1 OS=Homo sapiens OX=9606 GN=SLC47A1 PE=1 SV=1	61.922	570	1.503	0.587844	0.534303	0.990959	4	15.4279	14.7401	15.2073	13.7851
P35754	GLRX1_HUMAN	GLRX	Glutaredoxin-1 OS=Homo sapiens OX=9606 GN=GLRX PE=1 SV=2	11.776	106	1.50211	0.58699	0.470042	0.990959	4	19.856	20.1112	18.7448	20.0485
Q8NFH8	REPS2_HUMAN	REPS2	RalBP1-associated Eps domain-containing protein 2 OS=Homo sapiens OX=9606 GN=REPS2 PE=1 SV=2	71.534	660	1.50074	0.585671	0.140604	0.990959	4	15.4234	15.2062	14.508	14.9503
Q7Z7G8	VP13B_HUMAN	VPS13B	Vacuolar protein sorting-associated protein 13B OS=Homo sapiens OX=9606 GN=VPS13B PE=1 SV=2	448.664	4022	1.49868	0.583689	0.462385	0.990959	4	15.6918	14.4395	14.3176	14.6463
A6NDE8	GG12H_HUMAN	GAGE12H	G antigen 12H OS=Homo sapiens OX=9606 GN=GAGE12H PE=3 SV=1	12.924	117	1.49256	0.577787	0.513879	0.990959	4	21.9496	21.6689	20.5105	21.9524
Q13127	REST_HUMAN	REST	RE1-silencing transcription factor OS=Homo sapiens OX=9606 GN=REST PE=1 SV=3	121.872	1097	1.48988	0.575192	0.415429	0.990959	4	15.5268	15.495	15.5	14.3714
Q9BV19	CA050_HUMAN	C1orf50	Uncharacterized protein C1orf50 OS=Homo sapiens OX=9606 GN=C1orf50 PE=1 SV=2	21.877	199	1.48407	0.569555	0.487988	0.990959	4	18.3392	17.9593	18.2281	16.9313
P11362	FGFR1_HUMAN	FGFR1	Fibroblast growth factor receptor 1 OS=Homo sapiens OX=9606 GN=FGFR1 PE=1 SV=3	91.868	822	1.48364	0.56914	0.0834066	0.990959	4	17.577	17.8113	16.9942	17.2558
Q9NUW8	TYDP1_HUMAN	TDP1	Tyrosyl-DNA phosphodiesterase 1 OS=Homo sapiens OX=9606 GN=TDP1 PE=1 SV=2	68.42	608	1.47878	0.564409	0.318003	0.990959	4	17.7225	17.3029	16.5753	17.3213
Q6IE81	JADE1_HUMAN	JADE1	Protein Jade-1 OS=Homo sapiens OX=9606 GN=JADE1 PE=1 SV=1	95.533	842	1.47356	0.559304	0.229639	0.990959	4	16.8958	17.161	16.1698	16.7683
Q567V2	M17L2_HUMAN	MPV17L2	Mpv17-like protein 2 OS=Homo sapiens OX=9606 GN=MPV17L2 PE=1 SV=2	23.18	206	1.47084	0.556637	0.299142	0.990959	4	18.5146	18.1404	17.4167	18.125
Q8NG11	TSN14_HUMAN	TSPAN14	Tetraspanin-14 OS=Homo sapiens OX=9606 GN=TSPAN14 PE=1 SV=1	30.691	270	1.46944	0.555271	0.251473	0.990959	4	16.7686	17.0889	16.0647	16.6823
P42679	MATK_HUMAN	MATK	Megakaryocyte-associated tyrosine-protein kinase OS=Homo sapiens OX=9606 GN=MATK PE=1 SV=1	56.469	507	1.4683	0.554142	0.158375	0.990959	4	16.141	16.3173	15.4395	15.9105
Q5T8I3	F102B_HUMAN	FAM102B	Protein FAM102B OS=Homo sapiens OX=9606 GN=FAM102B PE=1 SV=2	39.308	360	1.46592	0.551803	0.0192976	0.990959	4	17.418	17.3531	16.9044	16.763
P35625	TIMP3_HUMAN	TIMP3	Metalloproteinase inhibitor 3 OS=Homo sapiens OX=9606 GN=TIMP3 PE=1 SV=2	24.145	211	1.46583	0.551714	0.361202	0.990959	4	17.4959	17.2767	16.3777	17.2915
Q8IUS5	EPHX4_HUMAN	EPHX4	Epoxide hydrolase 4 OS=Homo sapiens OX=9606 GN=EPHX4 PE=1 SV=2	42.324	362	1.46519	0.551084	0.502651	0.990959	4	19.3503	19.5703	18.2384	19.58
Q9BRU9	UTP23_HUMAN	UTP23	rRNA-processing protein UTP23 homolog OS=Homo sapiens OX=9606 GN=UTP23 PE=1 SV=2	28.402	249	1.46329	0.549212	0.43258	0.990959	4	17.7	18.4034	17.0621	17.9428
Q7RTS1	BHA15_HUMAN	BHLHA15	Class A basic helix-loop-helix protein 15 OS=Homo sapiens OX=9606 GN=BHLHA15 PE=1 SV=1	20.818	189	1.46122	0.547168	0.347261	0.990959	4	19.6044	19.2216	18.4596	19.272
O95159	ZFPL1_HUMAN	ZFPL1	Zinc finger protein-like 1 OS=Homo sapiens OX=9606 GN=ZFPL1 PE=1 SV=2	34.114	310	1.45998	0.54595	0.440849	0.990959	4	19.216	19.2561	18.1181	19.2621
Q9UBK9	UXT_HUMAN	UXT	Protein UXT OS=Homo sapiens OX=9606 GN=UXT PE=1 SV=1	18.246	157	1.45945	0.545422	0.357571	0.990959	4	18.845	18.3207	17.6593	18.4155
A1L020	MEX3A_HUMAN	MEX3A	RNA-binding protein MEX3A OS=Homo sapiens OX=9606 GN=MEX3A PE=1 SV=1	54.173	520	1.4583	0.544286	0.37762	0.990959	4	16.1166	15.7611	15.8447	14.9444
P0C2W1	FBSP1_HUMAN	FBXO45	F-box/SPRY domain-containing protein 1 OS=Homo sapiens OX=9606 GN=FBXO45 PE=1 SV=1	30.633	286	1.45732	0.543313	0.152171	0.990959	4	17.0644	17.5443	16.7485	16.7735
Q9BVM2	DPCD_HUMAN	DPCD	Protein DPCD OS=Homo sapiens OX=9606 GN=DPCD PE=1 SV=2	23.24	203	1.45705	0.543053	0.177746	0.990959	4	18.2427	18.4423	18.0458	17.5531
Q16560	U1SBP_HUMAN	SNRNP35	U11/U12 small nuclear ribonucleoprotein 35 kDa protein OS=Homo sapiens OX=9606 GN=SNRNP35 PE=1 SV=1	29.45	246	1.4552	0.541215	0.179253	0.990959	4	16.0473	16.1307	15.8109	15.2847
Q8N350	CBARP_HUMAN	CBARP	Voltage-dependent calcium channel beta subunit-associated regulatory protein OS=Homo sapiens OX=9606 GN=CBARP PE=1 SV=3	73.929	705	1.45474	0.540763	0.432922	0.990959	4	14.899	15.6741	14.3479	15.1436
Q9Y6A1	POMT1_HUMAN	POMT1	Protein O-mannosyl-transferase 1 OS=Homo sapiens OX=9606 GN=POMT1 PE=1 SV=3	84.881	747	1.45324	0.53927	0.157278	0.990959	4	17.5217	17.921	17.0425	17.3217
Q9Y2K1	ZBTB1_HUMAN	ZBTB1	Zinc finger and BTB domain-containing protein 1 OS=Homo sapiens OX=9606 GN=ZBTB1 PE=1 SV=3	82.016	713	1.45102	0.537071	0.036042	0.990959	4	17.0533	17.1871	16.5025	16.6638
Q5W0Z9	ZDH20_HUMAN	ZDHHC20	Palmitoyltransferase ZDHHC20 OS=Homo sapiens OX=9606 GN=ZDHHC20 PE=1 SV=1	42.278	365	1.44476	0.530834	0.0612292	0.990959	4	17.1488	17.1759	16.4944	16.7686
Q70EL1	UBP54_HUMAN	USP54	Inactive ubiquitin carboxyl-terminal hydrolase 54 OS=Homo sapiens OX=9606 GN=USP54 PE=1 SV=4	187.388	1684	1.4439	0.529969	0.344957	0.990959	4	16.5178	16.2231	16.2468	15.4341
Q13433	S39A6_HUMAN	SLC39A6	Zinc transporter ZIP6 OS=Homo sapiens OX=9606 GN=SLC39A6 PE=1 SV=3	85.047	755	1.44247	0.528537	0.226092	0.990959	4	17.3628	16.9036	16.4027	16.8067
P00450	CERU_HUMAN	CP	Ceruloplasmin OS=Homo sapiens OX=9606 GN=CP PE=1 SV=1	122.205	1065	1.44192	0.527994	0.562615	0.990959	4	15.0303	15.2059	13.8275	15.3527
Q8NBM8	PCYXL_HUMAN	PCYOX1L	Prenylcysteine oxidase-like OS=Homo sapiens OX=9606 GN=PCYOX1L PE=1 SV=2	54.646	494	1.44158	0.527651	0.331608	0.990959	4	16.5048	16.7602	15.7098	16.4999
Q9UF56	FXL17_HUMAN	FBXL17	F-box/LRR-repeat protein 17 OS=Homo sapiens OX=9606 GN=FBXL17 PE=1 SV=3	75.695	701	1.44157	0.527642	0.340583	0.990959	4	14.725	15.2283	14.1061	14.7919
Q8TBE9	NANP_HUMAN	NANP	N-acylneuraminate-9-phosphatase OS=Homo sapiens OX=9606 GN=NANP PE=1 SV=1	27.813	248	1.43948	0.525548	0.149281	0.990959	4	17.9876	17.9192	17.6549	17.2008
Q9NUS5	AP5S1_HUMAN	AP5S1	AP-5 complex subunit sigma-1 OS=Homo sapiens OX=9606 GN=AP5S1 PE=1 SV=1	22.522	200	1.43917	0.525237	0.237799	0.990959	4	17.4514	17.2061	16.5129	17.0941
Q9UHW9	S12A6_HUMAN	SLC12A6	Solute carrier family 12 member 6 OS=Homo sapiens OX=9606 GN=SLC12A6 PE=1 SV=2	127.617	1150	1.43813	0.52419	0.15089	0.990959	4	16.9667	16.5097	16.1834	16.2446
Q17R31	TATD3_HUMAN	TATDN3	Putative deoxyribonuclease TATDN3 OS=Homo sapiens OX=9606 GN=TATDN3 PE=1 SV=1	30.333	274	1.43719	0.523253	0.159382	0.990959	4	14.9481	15.0366	14.2349	14.7034
Q13642	FHL1_HUMAN	FHL1	Four and a half LIM domains protein 1 OS=Homo sapiens OX=9606 GN=FHL1 PE=1 SV=4	36.263	323	1.43441	0.520458	0.105591	0.990959	4	16.043	15.8608	15.2715	15.5913
Q8N4S0	CCD82_HUMAN	CCDC82	Coiled-coil domain-containing protein 82 OS=Homo sapiens OX=9606 GN=CCDC82 PE=1 SV=2	64.002	544	1.43293	0.518973	0.0132073	0.990959	4	16.6614	16.6618	16.2029	16.0824
P31271	HXA13_HUMAN	HOXA13	Homeobox protein Hox-A13 OS=Homo sapiens OX=9606 GN=HOXA13 PE=1 SV=3	39.727	388	1.43183	0.517858	0.023395	0.990959	4	17.1457	17.0372	16.6332	16.5139
Q96BZ9	TBC20_HUMAN	TBC1D20	TBC1 domain family member 20 OS=Homo sapiens OX=9606 GN=TBC1D20 PE=1 SV=1	45.855	403	1.42921	0.51522	0.630372	0.990959	4	15.6168	15.2503	14.021	15.8157
P86452	ZBED6_HUMAN	ZBED6	Zinc finger BED domain-containing protein 6 OS=Homo sapiens OX=9606 GN=ZBED6 PE=1 SV=1	109.973	979	1.42891	0.514916	0.489501	0.990959	4	17.0189	18.0154	16.6447	17.3598
Q9NYG5	APC11_HUMAN	ANAPC11	Anaphase-promoting complex subunit 11 OS=Homo sapiens OX=9606 GN=ANAPC11 PE=1 SV=1	9.841	84	1.42389	0.509839	0.421387	0.990959	4	15.2619	16.2382	15.0989	15.3815
A0JNW5	UH1BL_HUMAN	UHRF1BP1L	UHRF1-binding protein 1-like OS=Homo sapiens OX=9606 GN=UHRF1BP1L PE=1 SV=2	164.199	1464	1.42064	0.506539	0.262316	0.990959	4	15.5259	15.3447	15.2438	14.6137
Q8TDR0	MIPT3_HUMAN	TRAF3IP1	TRAF3-interacting protein 1 OS=Homo sapiens OX=9606 GN=TRAF3IP1 PE=1 SV=1	78.632	691	1.41998	0.505866	0.586098	0.990959	4	14.3615	15.8738	14.3945	14.829
Q9BQQ3	GORS1_HUMAN	GORASP1	Golgi reassembly-stacking protein 1 OS=Homo sapiens OX=9606 GN=GORASP1 PE=1 SV=3	46.482	440	1.41743	0.503273	0.180204	0.990959	4	19.0174	19.1628	18.3491	18.8245
Q86WP2	GPBP1_HUMAN	GPBP1	Vasculin OS=Homo sapiens OX=9606 GN=GPBP1 PE=1 SV=1	53.339	473	1.41627	0.502097	0.0656223	0.990959	4	16.8871	16.8787	16.2455	16.5161
Q969X1	LFG3_HUMAN	TMBIM1	Protein lifeguard 3 OS=Homo sapiens OX=9606 GN=TMBIM1 PE=1 SV=2	34.607	311	1.41547	0.501284	0.59656	0.990959	4	19.3328	18.9929	17.8758	19.4473
Q8TF72	SHRM3_HUMAN	SHROOM3	Protein Shroom3 OS=Homo sapiens OX=9606 GN=SHROOM3 PE=1 SV=2	216.857	1996	1.41539	0.501202	0.690733	0.990959	4	13.7455	14.6836	12.7297	14.697
Q8TAG9	EXOC6_HUMAN	EXOC6	Exocyst complex component 6 OS=Homo sapiens OX=9606 GN=EXOC6 PE=1 SV=3	93.722	804	1.41378	0.499555	0.435626	0.990959	4	17.2092	17.031	17.1295	16.1116
Q9H4F8	SMOC1_HUMAN	SMOC1	SPARC-related modular calcium-binding protein 1 OS=Homo sapiens OX=9606 GN=SMOC1 PE=1 SV=1	48.163	434	1.40696	0.492578	0.158264	0.990959	4	17.1777	17.1369	16.4423	16.8872
Q9Y312	AAR2_HUMAN	AAR2	Protein AAR2 homolog OS=Homo sapiens OX=9606 GN=AAR2 PE=1 SV=2	43.472	384	1.40662	0.492236	0.191416	0.990959	4	19.6561	19.3993	18.8171	19.2538
Q86WG5	MTMRD_HUMAN	SBF2	Myotubularin-related protein 13 OS=Homo sapiens OX=9606 GN=SBF2 PE=1 SV=1	208.464	1849	1.40658	0.492195	0.109425	0.990959	4	16.6239	16.2866	16.0191	15.9069
P12757	SKIL_HUMAN	SKIL	Ski-like protein OS=Homo sapiens OX=9606 GN=SKIL PE=1 SV=2	76.976	684	1.40622	0.491822	0.493791	0.990959	4	15.926	16.2414	16.163	15.0207
Q9BXV9	GON7_HUMAN	GON7	EKC/KEOPS complex subunit GON7 OS=Homo sapiens OX=9606 GN=GON7 PE=1 SV=2	10.859	100	1.40358	0.489109	0.328745	0.990959	4	19.1228	19.2539	18.323	19.0755
Q9H4I9	EMRE_HUMAN	SMDT1	Essential MCU regulator, mitochondrial OS=Homo sapiens OX=9606 GN=SMDT1 PE=1 SV=1	11.441	107	1.40251	0.48801	0.499572	0.990959	4	18.1687	17.5534	17.8847	16.8614
Q9Y256	FACE2_HUMAN	RCE1	CAAX prenyl protease 2 OS=Homo sapiens OX=9606 GN=RCE1 PE=1 SV=1	35.833	329	1.40184	0.487325	0.452605	0.990959	4	18.5179	18.3378	17.4214	18.4596
P52943	CRIP2_HUMAN	CRIP2	Cysteine-rich protein 2 OS=Homo sapiens OX=9606 GN=CRIP2 PE=1 SV=1	22.493	208	1.40118	0.486642	0.477989	0.990959	4	17.6385	17.7324	16.6385	17.7591
Q99453	PHX2B_HUMAN	PHOX2B	Paired mesoderm homeobox protein 2B OS=Homo sapiens OX=9606 GN=PHOX2B PE=2 SV=2	31.621	314	1.40066	0.486102	0.116929	0.990959	4	16.633	16.4454	15.8964	16.2098
A6H8Y1	BDP1_HUMAN	BDP1	Transcription factor TFIIIB component B'' homolog OS=Homo sapiens OX=9606 GN=BDP1 PE=1 SV=3	293.885	2624	1.39954	0.484951	0.151899	0.990959	4	15.248	15.359	15.0254	14.6116
Q13233	M3K1_HUMAN	MAP3K1	Mitogen-activated protein kinase kinase kinase 1 OS=Homo sapiens OX=9606 GN=MAP3K1 PE=1 SV=4	164.47	1512	1.39756	0.482914	0.278535	0.990959	4	16.6053	16.1338	16.1143	15.659
Q9P2W1	HOP2_HUMAN	PSMC3IP	Homologous-pairing protein 2 homolog OS=Homo sapiens OX=9606 GN=PSMC3IP PE=1 SV=1	24.906	217	1.3962	0.481507	0.124937	0.990959	4	17.8055	17.9404	17.2157	17.5673
Q12948	FOXC1_HUMAN	FOXC1	Forkhead box protein C1 OS=Homo sapiens OX=9606 GN=FOXC1 PE=1 SV=3	56.789	553	1.39562	0.480907	0.320406	0.990959	4	17.4115	17.3468	16.5326	17.2639
P06213	INSR_HUMAN	INSR	Insulin receptor OS=Homo sapiens OX=9606 GN=INSR PE=1 SV=4	156.333	1382	1.39454	0.479789	0.505773	0.990959	4	18.7217	18.7105	17.6396	18.8331
Q6P2P2	ANM9_HUMAN	PRMT9	Protein arginine N-methyltransferase 9 OS=Homo sapiens OX=9606 GN=PRMT9 PE=1 SV=1	94.501	845	1.39352	0.478737	0.45132	0.990959	4	16.4162	16.6202	16.5451	15.5338
Q9UHA4	LTOR3_HUMAN	LAMTOR3	Ragulator complex protein LAMTOR3 OS=Homo sapiens OX=9606 GN=LAMTOR3 PE=1 SV=1	13.623	124	1.39155	0.476689	0.727409	0.990959	4	21.2772	21.8827	22.2538	19.9527
O75529	TAF5L_HUMAN	TAF5L	TAF5-like RNA polymerase II p300/CBP-associated factor-associated factor 65 kDa subunit 5L OS=Homo sapiens OX=9606 GN=TAF5L PE=1 SV=1	66.155	589	1.39102	0.476142	0.394349	0.990959	4	17.8669	17.0062	16.858	17.0628
O75064	DEN4B_HUMAN	DENND4B	DENN domain-containing protein 4B OS=Homo sapiens OX=9606 GN=DENND4B PE=1 SV=4	163.847	1496	1.39043	0.475533	0.0825704	0.990959	4	17.5076	17.7038	17.0223	17.2381
P51571	SSRD_HUMAN	SSR4	Translocon-associated protein subunit delta OS=Homo sapiens OX=9606 GN=SSR4 PE=1 SV=1	18.999	173	1.39033	0.475423	0.490881	0.990959	4	24.4032	24.2446	23.2857	24.4112
Q9BZ23	PANK2_HUMAN	PANK2	Pantothenate kinase 2, mitochondrial OS=Homo sapiens OX=9606 GN=PANK2 PE=1 SV=3	62.681	570	1.38977	0.474849	0.12969	0.990959	4	18.7363	18.5847	18.3599	18.0115
Q9UPY3	DICER_HUMAN	DICER1	Endoribonuclease Dicer OS=Homo sapiens OX=9606 GN=DICER1 PE=1 SV=3	218.682	1922	1.38933	0.474388	0.0722985	0.990959	4	16.8843	16.6175	16.2557	16.2973
P30050	RL12_HUMAN	RPL12	60S ribosomal protein L12 OS=Homo sapiens OX=9606 GN=RPL12 PE=1 SV=1	17.819	165	1.38916	0.474212	0.395879	0.990959	4	25.7974	25.5495	24.7747	25.6238
Q9P0J7	KCMF1_HUMAN	KCMF1	E3 ubiquitin-protein ligase KCMF1 OS=Homo sapiens OX=9606 GN=KCMF1 PE=1 SV=2	41.945	381	1.38897	0.474016	0.223568	0.990959	4	19.6403	19.1383	19.0203	18.8104
Q8IV63	VRK3_HUMAN	VRK3	Inactive serine/threonine-protein kinase VRK3 OS=Homo sapiens OX=9606 GN=VRK3 PE=1 SV=2	52.881	474	1.38884	0.473885	0.38635	0.990959	4	16.7009	16.7121	15.8015	16.6637
Q5JTD0	TJAP1_HUMAN	TJAP1	Tight junction-associated protein 1 OS=Homo sapiens OX=9606 GN=TJAP1 PE=1 SV=1	61.821	557	1.38884	0.473882	0.177938	0.990959	4	19.963	19.5963	19.1634	19.448
P20333	TNR1B_HUMAN	TNFRSF1B	Tumor necrosis factor receptor superfamily member 1B OS=Homo sapiens OX=9606 GN=TNFRSF1B PE=1 SV=3	48.291	461	1.38732	0.472303	0.691173	0.990959	4	15.1966	16.8501	14.9391	16.1629
Q13509	TBB3_HUMAN	TUBB3	Tubulin beta-3 chain OS=Homo sapiens OX=9606 GN=TUBB3 PE=1 SV=2	50.433	450	1.3843	0.469154	0.507902	0.990959	4	17.8142	17.7977	16.75	17.9236
A7MCY6	TBKB1_HUMAN	TBKBP1	TANK-binding kinase 1-binding protein 1 OS=Homo sapiens OX=9606 GN=TBKBP1 PE=1 SV=1	67.702	615	1.38417	0.469017	0.216026	0.990959	4	15.2052	15.7178	15.0499	14.9351
Q13118	KLF10_HUMAN	KLF10	Krueppel-like factor 10 OS=Homo sapiens OX=9606 GN=KLF10 PE=1 SV=1	52.555	480	1.38367	0.468505	0.188892	0.990959	4	16.0377	15.9103	15.2753	15.7358
Q6IQ26	DEN5A_HUMAN	DENND5A	DENN domain-containing protein 5A OS=Homo sapiens OX=9606 GN=DENND5A PE=1 SV=2	147.096	1287	1.38309	0.467897	0.178953	0.990959	4	16.1617	15.9052	15.7565	15.3746
Q12980	NPRL3_HUMAN	NPRL3	GATOR complex protein NPRL3 OS=Homo sapiens OX=9606 GN=NPRL3 PE=1 SV=1	63.605	569	1.38168	0.466428	0.237027	0.990959	4	18.5251	18.0454	17.6754	17.9621
O15525	MAFG_HUMAN	MAFG	Transcription factor MafG OS=Homo sapiens OX=9606 GN=MAFG PE=1 SV=1	17.85	162	1.38044	0.465128	0.313892	0.990959	4	17.802	17.924	17.7413	17.0545
Q9Y2I8	WDR37_HUMAN	WDR37	WD repeat-containing protein 37 OS=Homo sapiens OX=9606 GN=WDR37 PE=1 SV=2	54.665	494	1.37917	0.463799	0.351438	0.990959	4	16.9334	16.5367	16.6011	15.9414
P11474	ERR1_HUMAN	ESRRA	Steroid hormone receptor ERR1 OS=Homo sapiens OX=9606 GN=ESRRA PE=1 SV=3	45.51	423	1.37831	0.462902	0.231507	0.990959	4	17.4942	17.9315	17.0873	17.4126
Q96NB2	SFXN2_HUMAN	SFXN2	Sideroflexin-2 OS=Homo sapiens OX=9606 GN=SFXN2 PE=1 SV=2	36.232	322	1.3769	0.461419	0.340897	0.990959	4	18.4415	18.2936	17.5413	18.271
Q30201	HFE_HUMAN	HFE	Hereditary hemochromatosis protein OS=Homo sapiens OX=9606 GN=HFE PE=1 SV=1	40.108	348	1.37626	0.460752	0.754428	0.990959	4	15.1934	13.7282	15.057	12.943
Q86Y79	PTH_HUMAN	PTRH1	Probable peptidyl-tRNA hydrolase OS=Homo sapiens OX=9606 GN=PTRH1 PE=1 SV=1	22.937	214	1.37605	0.460532	0.594486	0.990959	4	18.5	19.0972	17.6675	19.0086
A8MTY0	ZN724_HUMAN	ZNF724	Zinc finger protein 724 OS=Homo sapiens OX=9606 GN=ZNF724 PE=2 SV=3	71.172	619	1.37235	0.456644	0.203341	0.990959	4	14.9518	14.7412	14.611	14.1687
P54274	TERF1_HUMAN	TERF1	Telomeric repeat-binding factor 1 OS=Homo sapiens OX=9606 GN=TERF1 PE=1 SV=3	50.246	439	1.37215	0.456433	0.144428	0.990959	4	17.0791	16.8276	16.6463	16.3475
Q8N6L1	KTAP2_HUMAN	KRTCAP2	Keratinocyte-associated protein 2 OS=Homo sapiens OX=9606 GN=KRTCAP2 PE=1 SV=2	14.679	136	1.37063	0.454838	0.512675	0.990959	4	17.5119	16.9709	16.2777	17.2954
Q8TDH9	BL1S5_HUMAN	BLOC1S5	Biogenesis of lysosome-related organelles complex 1 subunit 5 OS=Homo sapiens OX=9606 GN=BLOC1S5 PE=1 SV=1	21.609	187	1.36989	0.454055	0.298232	0.990959	4	18.5296	18.1701	17.6239	18.1677
Q9Y291	RT33_HUMAN	MRPS33	28S ribosomal protein S33, mitochondrial OS=Homo sapiens OX=9606 GN=MRPS33 PE=1 SV=1	12.629	106	1.36968	0.453838	0.076361	0.990959	4	16.6046	16.5074	16.2261	15.9782
Q6ZMQ8	LMTK1_HUMAN	AATK	Serine/threonine-protein kinase LMTK1 OS=Homo sapiens OX=9606 GN=AATK PE=1 SV=2	144.569	1374	1.36929	0.453429	0.484968	0.990959	4	16.6828	16.3362	16.5608	15.5514
P35580	MYH10_HUMAN	MYH10	Myosin-10 OS=Homo sapiens OX=9606 GN=MYH10 PE=1 SV=3	228.999	1976	1.36736	0.451388	0.282611	0.990959	4	15.0121	15.6235	14.8152	14.9177
P54652	HSP72_HUMAN	HSPA2	Heat shock-related 70 kDa protein 2 OS=Homo sapiens OX=9606 GN=HSPA2 PE=1 SV=1	70.021	639	1.36608	0.450039	0.066698	0.990959	4	17.9522	17.7099	17.363	17.399
Q6NVV7	CDPF1_HUMAN	CDPF1	Cysteine-rich DPF motif domain-containing protein 1 OS=Homo sapiens OX=9606 GN=CDPF1 PE=1 SV=1	13.877	123	1.36274	0.446513	0.585266	0.990959	4	17.1705	17.3351	16.1184	17.4941
Q15283	RASA2_HUMAN	RASA2	Ras GTPase-activating protein 2 OS=Homo sapiens OX=9606 GN=RASA2 PE=1 SV=3	96.614	850	1.36097	0.444634	0.349641	0.990959	4	18.0435	18.0488	17.2343	17.9688
P13747	HLAE_HUMAN	HLA-E	HLA class I histocompatibility antigen, alpha chain E OS=Homo sapiens OX=9606 GN=HLA-E PE=1 SV=4	40.058	358	1.36065	0.444297	0.581605	0.990959	4	17.002	16.2885	15.6197	16.7822
P35527	K1C9_HUMAN	KRT9	Keratin, type I cytoskeletal 9 OS=Homo sapiens OX=9606 GN=KRT9 PE=1 SV=3	62.064	623	1.3604	0.444035	0.763982	0.992261	4	19.1522	17.4185	16.8822	18.8004
P49356	FNTB_HUMAN	FNTB	Protein farnesyltransferase subunit beta OS=Homo sapiens OX=9606 GN=FNTB PE=1 SV=1	48.774	437	1.36007	0.443684	0.615003	0.990959	4	17.6531	16.9036	16.1826	17.4867
Q8N4J0	CARME_HUMAN	CARNMT1	Carnosine N-methyltransferase OS=Homo sapiens OX=9606 GN=CARNMT1 PE=1 SV=1	47.186	409	1.35956	0.443135	0.172155	0.990959	4	19.7872	19.4127	19.0567	19.2569
Q92610	ZN592_HUMAN	ZNF592	Zinc finger protein 592 OS=Homo sapiens OX=9606 GN=ZNF592 PE=1 SV=2	137.528	1267	1.3593	0.442859	0.121782	0.990959	4	16.1399	15.8065	15.4946	15.5661
Q9Y2E8	SL9A8_HUMAN	SLC9A8	Sodium/hydrogen exchanger 8 OS=Homo sapiens OX=9606 GN=SLC9A8 PE=1 SV=4	65.422	581	1.35926	0.442825	0.228603	0.990959	4	16.3635	15.9002	15.5748	15.8034
Q9BTE1	DCTN5_HUMAN	DCTN5	Dynactin subunit 5 OS=Homo sapiens OX=9606 GN=DCTN5 PE=1 SV=1	20.127	182	1.3569	0.440313	0.0358277	0.990959	4	19.6088	19.727	19.1656	19.2896
Q5H943	KKLC1_HUMAN	CT83	Kita-kyushu lung cancer antigen 1 OS=Homo sapiens OX=9606 GN=CT83 PE=1 SV=1	12.784	113	1.35637	0.439753	0.635387	0.990959	4	15.8752	16	16.2895	14.7062
Q9NUN5	LMBD1_HUMAN	LMBRD1	Lysosomal cobalamin transport escort protein LMBD1 OS=Homo sapiens OX=9606 GN=LMBRD1 PE=1 SV=1	61.389	540	1.3532	0.43637	0.30092	0.990959	4	19.7389	20.0299	19.1679	19.7281
O43623	SNAI2_HUMAN	SNAI2	Zinc finger protein SNAI2 OS=Homo sapiens OX=9606 GN=SNAI2 PE=1 SV=1	29.986	268	1.35063	0.433632	0.828272	0.993107	3	13.1044	11.6661	13.5569	10.3463
P50443	S26A2_HUMAN	SLC26A2	Sulfate transporter OS=Homo sapiens OX=9606 GN=SLC26A2 PE=1 SV=2	81.662	739	1.34826	0.431102	0.31865	0.990959	4	18.8823	18.6202	18.02	18.6203
Q9UII2	ATIF1_HUMAN	ATP5IF1	ATPase inhibitor, mitochondrial OS=Homo sapiens OX=9606 GN=ATP5IF1 PE=1 SV=1	12.249	106	1.34691	0.429648	0.032867	0.990959	4	22.335	22.1768	21.8152	21.8373
Q15032	R3HD1_HUMAN	R3HDM1	R3H domain-containing protein 1 OS=Homo sapiens OX=9606 GN=R3HDM1 PE=1 SV=3	120.696	1099	1.34672	0.429451	0.297115	0.990959	4	16.4131	16.4128	16.2908	15.6762
P07902	GALT_HUMAN	GALT	Galactose-1-phosphate uridylyltransferase OS=Homo sapiens OX=9606 GN=GALT PE=1 SV=3	43.363	379	1.34555	0.4282	0.293714	0.990959	4	17.3385	16.849	16.845	16.4861
P21397	AOFA_HUMAN	MAOA	Amine oxidase [flavin-containing] A OS=Homo sapiens OX=9606 GN=MAOA PE=1 SV=1	59.682	527	1.34396	0.426488	0.410335	0.990959	4	17.4166	16.5944	16.619	16.5391
Q86YH6	DLP1_HUMAN	PDSS2	All trans-polyprenyl-diphosphate synthase PDSS2 OS=Homo sapiens OX=9606 GN=PDSS2 PE=1 SV=2	44.129	399	1.34308	0.425543	0.175879	0.990959	4	18.5817	18.3374	18.2009	17.8671
Q9NXG0	CNTLN_HUMAN	CNTLN	Centlein OS=Homo sapiens OX=9606 GN=CNTLN PE=1 SV=6	161.571	1405	1.34277	0.425207	0.362694	0.990959	4	17.0982	16.4776	16.5521	16.1732
Q8NCA5	FA98A_HUMAN	FAM98A	Protein FAM98A OS=Homo sapiens OX=9606 GN=FAM98A PE=1 SV=2	55.273	518	1.34222	0.424625	0.318907	0.990959	4	20.2094	19.7522	19.3283	19.784
O95214	LERL1_HUMAN	LEPROTL1	Leptin receptor overlapping transcript-like 1 OS=Homo sapiens OX=9606 GN=LEPROTL1 PE=1 SV=2	14.428	131	1.3417	0.424063	0.367363	0.990959	4	16.5474	17.0515	16.1086	16.6422
P61073	CXCR4_HUMAN	CXCR4	C-X-C chemokine receptor type 4 OS=Homo sapiens OX=9606 GN=CXCR4 PE=1 SV=1	39.746	352	1.33946	0.421654	0.51617	0.990959	4	16.3698	15.4599	15.7828	15.2035
Q9H1A3	METL9_HUMAN	METTL9	Methyltransferase-like protein 9 OS=Homo sapiens OX=9606 GN=METTL9 PE=1 SV=1	36.536	318	1.33917	0.421336	0.0507979	0.990959	4	20.1706	20.3465	19.7922	19.8821
Q9H0K6	PUS7L_HUMAN	PUS7L	Pseudouridylate synthase 7 homolog-like protein OS=Homo sapiens OX=9606 GN=PUS7L PE=1 SV=1	80.7	701	1.33672	0.418698	0.157571	0.990959	4	21.1803	21.0165	20.8504	20.509
Q8N6S4	AN13C_HUMAN	ANKRD13C	Ankyrin repeat domain-containing protein 13C OS=Homo sapiens OX=9606 GN=ANKRD13C PE=1 SV=2	60.818	541	1.33618	0.418115	0.261828	0.990959	4	15.8237	15.6457	15.5717	15.0615
Q96H55	MYO19_HUMAN	MYO19	Unconventional myosin-XIX OS=Homo sapiens OX=9606 GN=MYO19 PE=1 SV=2	109.135	970	1.33604	0.417958	0.41512	0.990959	4	17.4818	17.6491	17.5487	16.7463
Q7L1T6	NB5R4_HUMAN	CYB5R4	Cytochrome b5 reductase 4 OS=Homo sapiens OX=9606 GN=CYB5R4 PE=1 SV=1	59.474	521	1.3359	0.41781	0.336418	0.990959	4	17.0264	17.5094	17.0794	16.6207
Q6PML9	ZNT9_HUMAN	SLC30A9	Zinc transporter 9 OS=Homo sapiens OX=9606 GN=SLC30A9 PE=1 SV=1	63.515	568	1.33394	0.415695	0.569362	0.990959	4	17.7856	18.3862	17.1323	18.2081
Q9P1Z0	ZBTB4_HUMAN	ZBTB4	Zinc finger and BTB domain-containing protein 4 OS=Homo sapiens OX=9606 GN=ZBTB4 PE=1 SV=3	105.114	1013	1.33287	0.414535	0.523091	0.990959	4	16.3448	16.4603	16.5251	15.4509
Q96EL3	RM53_HUMAN	MRPL53	39S ribosomal protein L53, mitochondrial OS=Homo sapiens OX=9606 GN=MRPL53 PE=1 SV=1	12.107	112	1.33163	0.413197	0.584753	0.990959	4	21.3286	21.2698	20.2466	21.5254
Q9HBG6	IF122_HUMAN	IFT122	Intraflagellar transport protein 122 homolog OS=Homo sapiens OX=9606 GN=IFT122 PE=1 SV=2	141.825	1241	1.33047	0.411936	0.650417	0.990959	4	17.0397	17.3631	16.0258	17.5532
Q16533	SNPC1_HUMAN	SNAPC1	snRNA-activating protein complex subunit 1 OS=Homo sapiens OX=9606 GN=SNAPC1 PE=1 SV=1	42.994	368	1.32997	0.411394	0.0058927	0.990959	4	13.6713	13.6328	13.2658	13.2154
O00233	PSMD9_HUMAN	PSMD9	26S proteasome non-ATPase regulatory subunit 9 OS=Homo sapiens OX=9606 GN=PSMD9 PE=1 SV=3	24.682	223	1.32875	0.410071	0.259458	0.990959	4	22.4585	22.1563	21.6819	22.1127
Q99683	M3K5_HUMAN	MAP3K5	Mitogen-activated protein kinase kinase kinase 5 OS=Homo sapiens OX=9606 GN=MAP3K5 PE=1 SV=1	154.537	1374	1.32856	0.40986	0.6148	0.990959	4	15.4839	14.5383	14.0928	15.1097
Q9NZJ4	SACS_HUMAN	SACS	Sacsin OS=Homo sapiens OX=9606 GN=SACS PE=1 SV=2	521.126	4579	1.32839	0.409682	0.261374	0.990959	4	16.6127	16.8745	16.5636	16.1042
Q9NV35	NUD15_HUMAN	NUDT15	Nucleotide triphosphate diphosphatase NUDT15 OS=Homo sapiens OX=9606 GN=NUDT15 PE=1 SV=1	18.609	164	1.32755	0.408771	0.372184	0.990959	4	18.1189	18.2328	17.4133	18.1209
O15078	CE290_HUMAN	CEP290	Centrosomal protein of 290 kDa OS=Homo sapiens OX=9606 GN=CEP290 PE=1 SV=2	290.386	2479	1.32657	0.407703	0.108672	0.990959	4	16.6439	16.4615	16.0302	16.2598
Q9NQZ7	ENTP7_HUMAN	ENTPD7	Ectonucleoside triphosphate diphosphohydrolase 7 OS=Homo sapiens OX=9606 GN=ENTPD7 PE=2 SV=1	68.96	604	1.32652	0.407641	0.401899	0.990959	4	17.2676	17.4992	16.6073	17.3442
P20248	CCNA2_HUMAN	CCNA2	Cyclin-A2 OS=Homo sapiens OX=9606 GN=CCNA2 PE=1 SV=2	48.551	432	1.32639	0.407506	0.498466	0.990959	4	19.6678	19.7933	19.8161	18.83
O43169	CYB5B_HUMAN	CYB5B	Cytochrome b5 type B OS=Homo sapiens OX=9606 GN=CYB5B PE=1 SV=3	16.695	150	1.32611	0.407199	0.503231	0.990959	4	24.2565	24.0774	23.2647	24.2547
Q96DA6	TIM14_HUMAN	DNAJC19	Mitochondrial import inner membrane translocase subunit TIM14 OS=Homo sapiens OX=9606 GN=DNAJC19 PE=1 SV=3	12.499	116	1.3261	0.407193	0.252575	0.990959	4	19.929	19.5475	19.1605	19.5016
O94929	ABLM3_HUMAN	ABLIM3	Actin-binding LIM protein 3 OS=Homo sapiens OX=9606 GN=ABLIM3 PE=1 SV=3	77.802	683	1.32536	0.406388	0.455912	0.990959	4	18.1098	17.4163	17.6326	17.0807
Q6ZUT6	CCD9B_HUMAN	CCDC9B	Coiled-coil domain-containing protein 9B OS=Homo sapiens OX=9606 GN=CCDC9B PE=1 SV=1	57.325	534	1.32511	0.406117	0.244461	0.990959	4	18.9781	18.982	18.3249	18.8229
Q07912	ACK1_HUMAN	TNK2	Activated CDC42 kinase 1 OS=Homo sapiens OX=9606 GN=TNK2 PE=1 SV=3	114.569	1038	1.32498	0.405967	0.44436	0.990959	4	15.9066	15.8489	15.9003	15.0432
P78552	I13R1_HUMAN	IL13RA1	Interleukin-13 receptor subunit alpha-1 OS=Homo sapiens OX=9606 GN=IL13RA1 PE=1 SV=1	48.76	427	1.32382	0.404702	0.122642	0.990959	4	16.655	16.8318	16.4679	16.2096
Q8NBW4	S38A9_HUMAN	SLC38A9	Sodium-coupled neutral amino acid transporter 9 OS=Homo sapiens OX=9606 GN=SLC38A9 PE=1 SV=2	63.776	561	1.32246	0.40322	0.478931	0.990959	4	18.1301	17.6887	17.9178	17.0946
Q9NPC7	MYNN_HUMAN	MYNN	Myoneurin OS=Homo sapiens OX=9606 GN=MYNN PE=1 SV=1	68.682	610	1.32119	0.401839	0.178203	0.990959	4	16.0583	16.0653	15.8569	15.463
O15304	SIVA_HUMAN	SIVA1	Apoptosis regulatory protein Siva OS=Homo sapiens OX=9606 GN=SIVA1 PE=1 SV=2	18.695	175	1.32064	0.401237	0.0364868	0.990959	4	15.6353	15.5233	15.2336	15.1226
O15258	RER1_HUMAN	RER1	Protein RER1 OS=Homo sapiens OX=9606 GN=RER1 PE=1 SV=1	22.958	196	1.3195	0.399988	0.411868	0.990959	4	19.3161	19.006	18.4044	19.1178
Q9H8M1	CQ10B_HUMAN	COQ10B	Coenzyme Q-binding protein COQ10 homolog B, mitochondrial OS=Homo sapiens OX=9606 GN=COQ10B PE=2 SV=1	27.071	238	1.31938	0.399861	0.0868336	0.990959	4	16.8304	16.6306	16.4078	16.2535
Q9Y3E5	PTH2_HUMAN	PTRH2	Peptidyl-tRNA hydrolase 2, mitochondrial OS=Homo sapiens OX=9606 GN=PTRH2 PE=1 SV=1	19.194	179	1.31818	0.398546	0.339495	0.990959	4	19.7636	19.7465	19.0362	19.6767
Q9HBE1	PATZ1_HUMAN	PATZ1	POZ-, AT hook-, and zinc finger-containing protein 1 OS=Homo sapiens OX=9606 GN=PATZ1 PE=1 SV=1	74.06	687	1.31754	0.397842	0.0378756	0.990959	4	16.7021	16.5794	16.2938	16.192
Q99638	RAD9A_HUMAN	RAD9A	Cell cycle checkpoint control protein RAD9A OS=Homo sapiens OX=9606 GN=RAD9A PE=1 SV=1	42.547	391	1.31753	0.397835	0.247736	0.990959	4	17.2297	16.8105	16.4928	16.7518
O14523	C2C2L_HUMAN	C2CD2L	Phospholipid transfer protein C2CD2L OS=Homo sapiens OX=9606 GN=C2CD2L PE=1 SV=3	76.181	706	1.31732	0.397604	0.0860205	0.990959	4	16.8827	16.6901	16.3093	16.4683
Q8N954	GPT11_HUMAN	GPATCH11	G patch domain-containing protein 11 OS=Homo sapiens OX=9606 GN=GPATCH11 PE=1 SV=4	33.277	285	1.31637	0.396569	0.0467387	0.990959	4	18.6183	18.5353	18.2589	18.1017
P22392	NDKB_HUMAN	NME2	Nucleoside diphosphate kinase B OS=Homo sapiens OX=9606 GN=NME2 PE=1 SV=1	17.298	152	1.31636	0.396551	0.52783	0.990959	4	24.9555	24.0815	23.8337	24.4102
Q9UBQ0	VPS29_HUMAN	VPS29	Vacuolar protein sorting-associated protein 29 OS=Homo sapiens OX=9606 GN=VPS29 PE=1 SV=1	20.506	182	1.31627	0.39646	0.430616	0.990959	4	22.1058	21.8857	21.2097	21.9888
P52655	TF2AA_HUMAN	GTF2A1	Transcription initiation factor IIA subunit 1 OS=Homo sapiens OX=9606 GN=GTF2A1 PE=1 SV=1	41.514	376	1.3158	0.395944	0.448015	0.990959	4	20.2634	19.9955	19.3323	20.1347
Q96E14	RMI2_HUMAN	RMI2	RecQ-mediated genome instability protein 2 OS=Homo sapiens OX=9606 GN=RMI2 PE=1 SV=2	15.865	147	1.31513	0.395211	0.441662	0.990959	4	17.7048	17.1604	17.351	16.7239
P61313	RL15_HUMAN	RPL15	60S ribosomal protein L15 OS=Homo sapiens OX=9606 GN=RPL15 PE=1 SV=2	24.146	204	1.31366	0.393589	0.530065	0.990959	4	25.0163	24.3214	23.8847	24.6658
Q9Y2G3	AT11B_HUMAN	ATP11B	Probable phospholipid-transporting ATPase IF OS=Homo sapiens OX=9606 GN=ATP11B PE=1 SV=2	134.19	1177	1.31309	0.392962	0.0833383	0.990959	4	17.0256	16.8236	16.5985	16.4647
Q8IUX1	T126B_HUMAN	TMEM126B	Complex I assembly factor TMEM126B, mitochondrial OS=Homo sapiens OX=9606 GN=TMEM126B PE=1 SV=2	25.943	230	1.31306	0.392937	0.411245	0.990959	4	18.5728	18.9073	18.0042	18.6899
Q5TG30	RHG40_HUMAN	ARHGAP40	Rho GTPase-activating protein 40 OS=Homo sapiens OX=9606 GN=ARHGAP40 PE=3 SV=3	68.908	622	1.31255	0.392377	0.570206	0.990959	4	21.3646	21.394	20.4042	21.5696
Q9UGK3	STAP2_HUMAN	STAP2	Signal-transducing adaptor protein 2 OS=Homo sapiens OX=9606 GN=STAP2 PE=1 SV=2	44.894	403	1.31242	0.392232	0.122417	0.990959	4	16.7226	16.5277	16.1169	16.349
Q96HD1	CREL1_HUMAN	CRELD1	Protein disulfide isomerase CRELD1 OS=Homo sapiens OX=9606 GN=CRELD1 PE=1 SV=3	45.44	420	1.31241	0.392221	0.46627	0.990959	4	16.1984	15.8787	15.237	16.0556
Q9BTA9	WAC_HUMAN	WAC	WW domain-containing adapter protein with coiled-coil OS=Homo sapiens OX=9606 GN=WAC PE=1 SV=3	70.724	647	1.3111	0.390781	0.302096	0.990959	4	18.0218	18.0806	17.3784	17.9425
Q9BQ75	CMS1_HUMAN	CMSS1	Protein CMSS1 OS=Homo sapiens OX=9606 GN=CMSS1 PE=1 SV=2	31.884	279	1.3093	0.388796	0.227706	0.990959	4	19.4033	19.3428	18.7602	19.2084
Q9Y6D0	SELK_HUMAN	SELENOK	Selenoprotein K OS=Homo sapiens OX=9606 GN=SELENOK PE=1 SV=3	10.645	94	1.30868	0.388114	0.438751	0.990959	4	20.6061	20.3171	19.6955	20.4515
Q15012	LAP4A_HUMAN	LAPTM4A	Lysosomal-associated transmembrane protein 4A OS=Homo sapiens OX=9606 GN=LAPTM4A PE=1 SV=1	26.801	233	1.30865	0.388078	0.200174	0.990959	4	19.8057	19.7474	19.1847	19.5924
Q8NDX6	ZN740_HUMAN	ZNF740	Zinc finger protein 740 OS=Homo sapiens OX=9606 GN=ZNF740 PE=1 SV=1	21.857	193	1.30797	0.387329	0.376257	0.990959	4	17.1296	17.4427	17.2043	16.5934
Q8N726	ARF_HUMAN	CDKN2A	Tumor suppressor ARF OS=Homo sapiens OX=9606 GN=CDKN2A PE=1 SV=2	13.903	132	1.30767	0.386996	0.193179	0.990959	4	20.0543	19.844	19.3916	19.7327
P04798	CP1A1_HUMAN	CYP1A1	Cytochrome P450 1A1 OS=Homo sapiens OX=9606 GN=CYP1A1 PE=1 SV=1	58.165	512	1.30594	0.385086	0.211439	0.990959	4	17.5494	17.8687	17.464	17.184
P30613	KPYR_HUMAN	PKLR	Pyruvate kinase PKLR OS=Homo sapiens OX=9606 GN=PKLR PE=1 SV=2	61.83	574	1.30589	0.385036	0.547559	0.990959	4	19.7786	20.3429	19.2192	20.1322
Q86V88	MGDP1_HUMAN	MDP1	Magnesium-dependent phosphatase 1 OS=Homo sapiens OX=9606 GN=MDP1 PE=1 SV=1	20.109	176	1.3044	0.383389	0.245697	0.990959	4	18.6781	18.6309	18.0364	18.5059
P08134	RHOC_HUMAN	RHOC	Rho-related GTP-binding protein RhoC OS=Homo sapiens OX=9606 GN=RHOC PE=1 SV=1	22.006	193	1.30351	0.382397	0.672584	0.990959	4	19.5374	19.8453	18.544	20.0739
Q9H992	MARH7_HUMAN	MARCHF7	E3 ubiquitin-protein ligase MARCHF7 OS=Homo sapiens OX=9606 GN=MARCHF7 PE=1 SV=1	78.051	704	1.30324	0.382108	0.297702	0.990959	4	16.9353	16.9977	16.8565	16.3123
Q86YC2	PALB2_HUMAN	PALB2	Partner and localizer of BRCA2 OS=Homo sapiens OX=9606 GN=PALB2 PE=1 SV=1	131.295	1186	1.30087	0.379482	0.662548	0.990959	4	15.2632	15.7267	15.8273	14.4038
Q96QT4	TRPM7_HUMAN	TRPM7	Transient receptor potential cation channel subfamily M member 7 OS=Homo sapiens OX=9606 GN=TRPM7 PE=1 SV=1	212.697	1865	1.30024	0.378777	0.458439	0.990959	4	16.9048	16.6114	16.7684	15.9903
Q9NPJ3	ACO13_HUMAN	ACOT13	Acyl-coenzyme A thioesterase 13 OS=Homo sapiens OX=9606 GN=ACOT13 PE=1 SV=1	14.96	140	1.29996	0.378465	0.332941	0.990959	4	21.9066	21.4111	21.1132	21.4476
O14867	BACH1_HUMAN	BACH1	Transcription regulator protein BACH1 OS=Homo sapiens OX=9606 GN=BACH1 PE=1 SV=2	81.958	736	1.29993	0.378432	0.406182	0.990959	4	16.0068	16.0068	15.9909	15.2658
Q9BQB6	VKOR1_HUMAN	VKORC1	Vitamin K epoxide reductase complex subunit 1 OS=Homo sapiens OX=9606 GN=VKORC1 PE=1 SV=1	18.235	163	1.29983	0.378327	0.307288	0.990959	4	20.0197	20.4324	19.6607	20.0348
Q13191	CBLB_HUMAN	CBLB	E3 ubiquitin-protein ligase CBL-B OS=Homo sapiens OX=9606 GN=CBLB PE=1 SV=2	109.45	982	1.29853	0.37688	0.500751	0.990959	4	18.1202	17.5713	17.0966	17.8412
Q9C091	GRB1L_HUMAN	GREB1L	GREB1-like protein OS=Homo sapiens OX=9606 GN=GREB1L PE=1 SV=2	214.354	1923	1.29782	0.376094	0.373206	0.990959	4	15.2086	15.2512	14.5239	15.1837
Q13393	PLD1_HUMAN	PLD1	Phospholipase D1 OS=Homo sapiens OX=9606 GN=PLD1 PE=1 SV=1	124.184	1074	1.29643	0.374545	0.270246	0.990959	4	15.1834	15.0658	14.509	14.9911
P78329	CP4F2_HUMAN	CYP4F2	Cytochrome P450 4F2 OS=Homo sapiens OX=9606 GN=CYP4F2 PE=1 SV=1	59.853	520	1.29513	0.373094	0.571001	0.990959	4	21.7401	21.8837	20.888	21.9896
Q8WYA0	IFT81_HUMAN	IFT81	Intraflagellar transport protein 81 homolog OS=Homo sapiens OX=9606 GN=IFT81 PE=1 SV=1	79.746	676	1.29473	0.372656	0.643858	0.990959	4	16.8948	16.321	16.8643	15.6062
O95671	ASML_HUMAN	ASMTL	Probable bifunctional dTTP/UTP pyrophosphatase/methyltransferase protein OS=Homo sapiens OX=9606 GN=ASMTL PE=1 SV=3	68.857	621	1.2944	0.37228	0.605045	0.990959	4	16.3426	16.4376	16.6283	15.4074
Q3SXY8	AR13B_HUMAN	ARL13B	ADP-ribosylation factor-like protein 13B OS=Homo sapiens OX=9606 GN=ARL13B PE=1 SV=1	48.643	428	1.29397	0.371809	0.271496	0.990959	4	16.3092	16.2741	15.6733	16.1665
Q99720	SGMR1_HUMAN	SIGMAR1	Sigma non-opioid intracellular receptor 1 OS=Homo sapiens OX=9606 GN=SIGMAR1 PE=1 SV=1	25.128	223	1.29281	0.370505	0.212457	0.990959	4	17.0473	16.9906	16.8515	16.4455
O00746	NDKM_HUMAN	NME4	Nucleoside diphosphate kinase, mitochondrial OS=Homo sapiens OX=9606 GN=NME4 PE=1 SV=1	20.659	187	1.29166	0.369223	0.495164	0.990959	4	15.836	15.4076	15.6443	14.8609
Q6PFW1	VIP1_HUMAN	PPIP5K1	Inositol hexakisphosphate and diphosphoinositol-pentakisphosphate kinase 1 OS=Homo sapiens OX=9606 GN=PPIP5K1 PE=1 SV=1	159.521	1433	1.29155	0.369099	0.565971	0.990959	4	15.1805	15.522	15.4963	14.468
P55268	LAMB2_HUMAN	LAMB2	Laminin subunit beta-2 OS=Homo sapiens OX=9606 GN=LAMB2 PE=1 SV=2	195.981	1798	1.29055	0.367985	0.321061	0.990959	4	16.5305	16.7955	16.5432	16.0468
Q6Y288	B3GLT_HUMAN	B3GLCT	Beta-1,3-glucosyltransferase OS=Homo sapiens OX=9606 GN=B3GLCT PE=1 SV=2	56.564	498	1.29009	0.367475	0.306748	0.990959	4	16.6669	17.1557	16.6588	16.4288
Q99583	MNT_HUMAN	MNT	Max-binding protein MNT OS=Homo sapiens OX=9606 GN=MNT PE=1 SV=1	62.3	582	1.29003	0.36741	0.0413239	0.990959	4	17.4271	17.2832	17.0154	16.9601
P09417	DHPR_HUMAN	QDPR	Dihydropteridine reductase OS=Homo sapiens OX=9606 GN=QDPR PE=1 SV=2	25.79	244	1.28967	0.367	0.306652	0.990959	4	21.0253	21.1875	20.4822	20.9966
Q93015	NAA80_HUMAN	NAA80	N-alpha-acetyltransferase 80 OS=Homo sapiens OX=9606 GN=NAA80 PE=1 SV=2	31.445	286	1.2888	0.36603	0.617582	0.990959	4	15.8851	16.2868	15.1276	16.3121
Q92826	HXB13_HUMAN	HOXB13	Homeobox protein Hox-B13 OS=Homo sapiens OX=9606 GN=HOXB13 PE=1 SV=2	30.676	284	1.28842	0.365602	0.115327	0.990959	4	17.5363	17.4765	17.0079	17.2737
O75943	RAD17_HUMAN	RAD17	Cell cycle checkpoint protein RAD17 OS=Homo sapiens OX=9606 GN=RAD17 PE=1 SV=2	77.055	681	1.28687	0.363867	0.285631	0.990959	4	18.4342	18.9373	18.3066	18.3372
Q9Y575	ASB3_HUMAN	ASB3	Ankyrin repeat and SOCS box protein 3 OS=Homo sapiens OX=9606 GN=ASB3 PE=1 SV=1	57.745	518	1.2851	0.361879	0.01995	0.990959	4	17.1055	17.0247	16.7358	16.6707
Q9H496	IFG15_HUMAN	TOR1AIP2	Torsin-1A-interacting protein 2, isoform IFRG15 OS=Homo sapiens OX=9606 GN=TOR1AIP2 PE=1 SV=1	15.348	131	1.28486	0.361614	0.162503	0.990959	4	18.7104	18.5973	18.1353	18.4492
Q6XUX3	DUSTY_HUMAN	DSTYK	Dual serine/threonine and tyrosine protein kinase OS=Homo sapiens OX=9606 GN=DSTYK PE=1 SV=2	105.206	929	1.28379	0.360407	0.548708	0.990959	4	17.6683	18.4462	18.0173	17.3765
Q9NRA0	SPHK2_HUMAN	SPHK2	Sphingosine kinase 2 OS=Homo sapiens OX=9606 GN=SPHK2 PE=1 SV=2	69.217	654	1.28304	0.359565	0.362833	0.990959	4	17.1006	17.3061	16.5539	17.1336
Q06547	GABP1_HUMAN	GABPB1	GA-binding protein subunit beta-1 OS=Homo sapiens OX=9606 GN=GABPB1 PE=1 SV=2	42.483	395	1.28223	0.358659	0.19305	0.990959	4	18.4079	18.6048	17.9903	18.305
Q9Y4Y9	LSM5_HUMAN	LSM5	U6 snRNA-associated Sm-like protein LSm5 OS=Homo sapiens OX=9606 GN=LSM5 PE=1 SV=3	9.937	91	1.28187	0.35825	0.578044	0.990959	4	18.8581	18.1525	17.7326	18.5615
P53794	SC5A3_HUMAN	SLC5A3	Sodium/myo-inositol cotransporter OS=Homo sapiens OX=9606 GN=SLC5A3 PE=1 SV=2	79.694	718	1.28185	0.358231	0.0807273	0.990959	4	17.8591	17.7797	17.3602	17.5621
Q96Q05	TPPC9_HUMAN	TRAPPC9	Trafficking protein particle complex subunit 9 OS=Homo sapiens OX=9606 GN=TRAPPC9 PE=1 SV=2	128.53	1148	1.28176	0.358128	0.456972	0.990959	4	15.6459	16.1767	15.8411	15.2653
O60239	3BP5_HUMAN	SH3BP5	SH3 domain-binding protein 5 OS=Homo sapiens OX=9606 GN=SH3BP5 PE=1 SV=2	50.425	455	1.28077	0.357017	0.0691324	0.990959	4	19.3687	19.1895	18.9644	18.8797
Q8WUA7	TB22A_HUMAN	TBC1D22A	TBC1 domain family member 22A OS=Homo sapiens OX=9606 GN=TBC1D22A PE=1 SV=2	59.121	517	1.2801	0.356259	0.618327	0.990959	4	15.4271	15.7609	15.8245	14.6509
O60292	SI1L3_HUMAN	SIPA1L3	Signal-induced proliferation-associated 1-like protein 3 OS=Homo sapiens OX=9606 GN=SIPA1L3 PE=1 SV=3	194.61	1781	1.27968	0.355788	0.275312	0.990959	4	15.8753	16.1011	15.8433	15.4215
Q9H6U8	ALG9_HUMAN	ALG9	Alpha-1,2-mannosyltransferase ALG9 OS=Homo sapiens OX=9606 GN=ALG9 PE=1 SV=2	69.863	611	1.2794	0.355469	0.177198	0.990959	4	20.0751	20.3652	19.9601	19.7692
Q14643	ITPR1_HUMAN	ITPR1	Inositol 1,4,5-trisphosphate receptor type 1 OS=Homo sapiens OX=9606 GN=ITPR1 PE=1 SV=3	313.929	2758	1.27843	0.354374	0.316211	0.990959	4	17.2983	17.8086	17.2792	17.1191
Q53R41	FAKD1_HUMAN	FASTKD1	FAST kinase domain-containing protein 1, mitochondrial OS=Homo sapiens OX=9606 GN=FASTKD1 PE=1 SV=1	97.411	847	1.27708	0.352851	0.534147	0.990959	4	16.4953	16.9006	16.7735	15.9167
Q9UGC7	RF1ML_HUMAN	MTRF1L	Peptide chain release factor 1-like, mitochondrial OS=Homo sapiens OX=9606 GN=MTRF1L PE=1 SV=1	43.6	380	1.27676	0.352491	0.0518894	0.990959	4	15.5993	15.4699	15.1292	15.235
Q9H902	REEP1_HUMAN	REEP1	Receptor expression-enhancing protein 1 OS=Homo sapiens OX=9606 GN=REEP1 PE=1 SV=1	22.255	201	1.27667	0.352391	0.16549	0.990959	4	16.1943	16.0239	15.8974	15.616
Q9H8U3	ZFAN3_HUMAN	ZFAND3	AN1-type zinc finger protein 3 OS=Homo sapiens OX=9606 GN=ZFAND3 PE=1 SV=1	25.184	227	1.27564	0.351226	0.377062	0.990959	4	17.5523	17.5349	17.5041	16.8806
Q13017	RHG05_HUMAN	ARHGAP5	Rho GTPase-activating protein 5 OS=Homo sapiens OX=9606 GN=ARHGAP5 PE=1 SV=2	172.46	1502	1.27514	0.350652	0.360119	0.990959	4	18.1425	18.0974	17.4724	18.0662
Q15051	IQCB1_HUMAN	IQCB1	IQ calmodulin-binding motif-containing protein 1 OS=Homo sapiens OX=9606 GN=IQCB1 PE=1 SV=1	68.929	598	1.27479	0.350261	0.352789	0.990959	4	16.1826	16.1574	16.1112	15.5283
Q9HAN9	NMNA1_HUMAN	NMNAT1	Nicotinamide/nicotinic acid mononucleotide adenylyltransferase 1 OS=Homo sapiens OX=9606 GN=NMNAT1 PE=1 SV=1	31.932	279	1.27465	0.3501	0.119118	0.990959	4	17.0065	16.8545	16.6896	16.4712
Q5VZF2	MBNL2_HUMAN	MBNL2	Muscleblind-like protein 2 OS=Homo sapiens OX=9606 GN=MBNL2 PE=1 SV=2	40.518	373	1.2745	0.349927	0.283281	0.990959	4	19.0288	18.6089	18.3511	18.5867
P84098	RL19_HUMAN	RPL19	60S ribosomal protein L19 OS=Homo sapiens OX=9606 GN=RPL19 PE=1 SV=1	23.466	196	1.27446	0.349883	0.187534	0.990959	4	22.6074	22.261	22.0452	22.1234
P49840	GSK3A_HUMAN	GSK3A	Glycogen synthase kinase-3 alpha OS=Homo sapiens OX=9606 GN=GSK3A PE=1 SV=2	50.981	483	1.27371	0.349032	0.0325385	0.990959	4	19.2608	19.2944	18.8662	18.9909
Q8IYQ7	THNS1_HUMAN	THNSL1	Threonine synthase-like 1 OS=Homo sapiens OX=9606 GN=THNSL1 PE=1 SV=2	83.07	743	1.2735	0.348799	0.0689266	0.990959	4	17.9337	17.7574	17.4572	17.5363
Q96RF0	SNX18_HUMAN	SNX18	Sorting nexin-18 OS=Homo sapiens OX=9606 GN=SNX18 PE=1 SV=2	68.894	628	1.27188	0.346965	0.0455893	0.990959	4	18.8445	18.8717	18.4356	18.5866
Q86TM6	SYVN1_HUMAN	SYVN1	E3 ubiquitin-protein ligase synoviolin OS=Homo sapiens OX=9606 GN=SYVN1 PE=1 SV=2	67.685	617	1.27153	0.34657	0.683203	0.990959	4	18.3215	17.9429	18.4945	17.0768
Q8N531	FBXL6_HUMAN	FBXL6	F-box/LRR-repeat protein 6 OS=Homo sapiens OX=9606 GN=FBXL6 PE=2 SV=1	58.588	539	1.27133	0.346341	0.115079	0.990959	4	17.7952	17.5742	17.272	17.4048
Q5TC82	RC3H1_HUMAN	RC3H1	Roquin-1 OS=Homo sapiens OX=9606 GN=RC3H1 PE=1 SV=1	125.736	1133	1.27086	0.345803	0.424823	0.990959	4	17.2458	17.1467	16.5062	17.1947
P54259	ATN1_HUMAN	ATN1	Atrophin-1 OS=Homo sapiens OX=9606 GN=ATN1 PE=1 SV=3	125.414	1190	1.26979	0.344587	0.347394	0.990959	4	20.4632	20.5711	20.4503	19.8949
Q96MH7	CE034_HUMAN	C5orf34	Uncharacterized protein C5orf34 OS=Homo sapiens OX=9606 GN=C5orf34 PE=2 SV=2	72.898	638	1.26924	0.343964	0.579011	0.990959	4	15.9749	15.8759	15.0597	16.1031
Q9Y692	GMEB1_HUMAN	GMEB1	Glucocorticoid modulatory element-binding protein 1 OS=Homo sapiens OX=9606 GN=GMEB1 PE=1 SV=2	62.591	573	1.26843	0.343043	0.391709	0.990959	4	18.9615	18.8449	18.8712	18.2491
P51957	NEK4_HUMAN	NEK4	Serine/threonine-protein kinase Nek4 OS=Homo sapiens OX=9606 GN=NEK4 PE=1 SV=2	94.597	841	1.26839	0.342993	0.74502	0.990959	4	15.0645	16.6514	15.9802	15.0498
P22466	GALA_HUMAN	GAL	Galanin peptides OS=Homo sapiens OX=9606 GN=GAL PE=1 SV=3	13.302	123	1.26833	0.34293	0.622409	0.990959	4	18.3592	18.4229	17.4543	18.6419
Q9Y6R4	M3K4_HUMAN	MAP3K4	Mitogen-activated protein kinase kinase kinase 4 OS=Homo sapiens OX=9606 GN=MAP3K4 PE=1 SV=2	181.685	1608	1.26813	0.3427	0.390396	0.990959	4	19.4498	19.2327	18.7027	19.2944
O15235	RT12_HUMAN	MRPS12	28S ribosomal protein S12, mitochondrial OS=Homo sapiens OX=9606 GN=MRPS12 PE=1 SV=1	15.173	138	1.26676	0.341145	0.00576552	0.990959	4	17.7743	17.7798	17.4618	17.41
Q9UMX0	UBQL1_HUMAN	UBQLN1	Ubiquilin-1 OS=Homo sapiens OX=9606 GN=UBQLN1 PE=1 SV=2	62.519	589	1.26674	0.341122	0.465915	0.990959	4	20.9684	20.4046	20.0878	20.6029
P51808	DYLT3_HUMAN	DYNLT3	Dynein light chain Tctex-type 3 OS=Homo sapiens OX=9606 GN=DYNLT3 PE=1 SV=1	13.062	116	1.26657	0.340923	0.471607	0.990959	4	18.9157	19.1997	18.3564	19.0772
Q969R2	OSBP2_HUMAN	OSBP2	Oxysterol-binding protein 2 OS=Homo sapiens OX=9606 GN=OSBP2 PE=1 SV=2	101.266	916	1.26614	0.340433	0.138931	0.990959	4	17.5377	17.2568	17.0789	17.0348
Q86YB8	ERO1B_HUMAN	ERO1B	ERO1-like protein beta OS=Homo sapiens OX=9606 GN=ERO1B PE=1 SV=2	53.543	467	1.2661	0.340394	0.486217	0.990959	4	15.8437	15.1314	15.3334	14.961
Q6PI26	SHQ1_HUMAN	SHQ1	Protein SHQ1 homolog OS=Homo sapiens OX=9606 GN=SHQ1 PE=1 SV=2	65.125	577	1.26572	0.339955	0.462188	0.990959	4	14.7237	14.5258	14.6484	13.9212
Q9UBF8	PI4KB_HUMAN	PI4KB	Phosphatidylinositol 4-kinase beta OS=Homo sapiens OX=9606 GN=PI4KB PE=1 SV=1	91.379	816	1.2657	0.339936	0.182357	0.990959	4	19.3098	19.0437	18.7322	18.9415
Q9Y2J4	AMOL2_HUMAN	AMOTL2	Angiomotin-like protein 2 OS=Homo sapiens OX=9606 GN=AMOTL2 PE=1 SV=3	85.764	779	1.26558	0.339804	0.0286429	0.990959	4	18.2656	18.1703	17.9125	17.8437
Q9NVX7	KBTB4_HUMAN	KBTBD4	Kelch repeat and BTB domain-containing protein 4 OS=Homo sapiens OX=9606 GN=KBTBD4 PE=1 SV=3	58.144	518	1.2653	0.339479	0.460063	0.990959	4	17.8645	17.3386	17.5284	16.9958
Q8IW35	CEP97_HUMAN	CEP97	Centrosomal protein of 97 kDa OS=Homo sapiens OX=9606 GN=CEP97 PE=1 SV=1	96.981	865	1.26495	0.339085	0.0531392	0.990959	4	17.83	17.8059	17.3983	17.5594
Q8N4L2	PP4P2_HUMAN	PIP4P2	Type 2 phosphatidylinositol 4,5-bisphosphate 4-phosphatase OS=Homo sapiens OX=9606 GN=PIP4P2 PE=1 SV=1	28.081	257	1.2645	0.338567	0.179534	0.990959	4	16.8716	16.9383	16.7298	16.403
Q9NY97	B3GN2_HUMAN	B3GNT2	N-acetyllactosaminide beta-1,3-N-acetylglucosaminyltransferase 2 OS=Homo sapiens OX=9606 GN=B3GNT2 PE=1 SV=2	46.022	397	1.26422	0.338243	0.284525	0.990959	4	17.7212	17.5789	17.0894	17.5342
Q08499	PDE4D_HUMAN	PDE4D	cAMP-specific 3',5'-cyclic phosphodiesterase 4D OS=Homo sapiens OX=9606 GN=PDE4D PE=1 SV=2	91.115	809	1.26393	0.337917	0.0973635	0.990959	4	18.0263	18.215	17.8466	17.7188
Q14135	VGLL4_HUMAN	VGLL4	Transcription cofactor vestigial-like protein 4 OS=Homo sapiens OX=9606 GN=VGLL4 PE=1 SV=4	30.948	290	1.2617	0.335371	0.716544	0.990959	4	16.6351	17.0659	15.7423	17.288
Q96AG3	S2546_HUMAN	SLC25A46	Solute carrier family 25 member 46 OS=Homo sapiens OX=9606 GN=SLC25A46 PE=1 SV=1	46.174	418	1.26056	0.334063	0.166123	0.990959	4	18.8763	18.6675	18.5542	18.3215
Q09019	DMWD_HUMAN	DMWD	Dystrophia myotonica WD repeat-containing protein OS=Homo sapiens OX=9606 GN=DMWD PE=1 SV=3	70.438	674	1.26032	0.333794	0.459363	0.990959	4	14.4408	14.5284	14.5155	13.7862
P51956	NEK3_HUMAN	NEK3	Serine/threonine-protein kinase Nek3 OS=Homo sapiens OX=9606 GN=NEK3 PE=1 SV=2	57.705	506	1.26013	0.333574	0.0734719	0.990959	4	16.0324	16.1055	15.6468	15.8239
Q6UX53	MET7B_HUMAN	METTL7B	Methyltransferase-like protein 7B OS=Homo sapiens OX=9606 GN=METTL7B PE=1 SV=2	27.775	244	1.26006	0.333487	0.288678	0.990959	4	19.4687	19.598	18.976	19.4237
O14773	TPP1_HUMAN	TPP1	Tripeptidyl-peptidase 1 OS=Homo sapiens OX=9606 GN=TPP1 PE=1 SV=2	61.248	563	1.25835	0.331532	0.167916	0.990959	4	18.7823	18.4701	18.2873	18.302
Q9HAP2	MLXIP_HUMAN	MLXIP	MLX-interacting protein OS=Homo sapiens OX=9606 GN=MLXIP PE=1 SV=2	101.185	919	1.25834	0.33152	0.0416749	0.990959	4	17.0641	17.0399	16.7893	16.6517
Q96C00	ZBTB9_HUMAN	ZBTB9	Zinc finger and BTB domain-containing protein 9 OS=Homo sapiens OX=9606 GN=ZBTB9 PE=1 SV=1	50.602	473	1.25741	0.330457	0.342586	0.990959	4	17.1192	16.8617	16.8948	16.4252
Q15542	TAF5_HUMAN	TAF5	Transcription initiation factor TFIID subunit 5 OS=Homo sapiens OX=9606 GN=TAF5 PE=1 SV=3	86.83	800	1.25638	0.329273	0.212835	0.990959	4	18.572	18.5039	18.3879	18.0294
Q16644	MAPK3_HUMAN	MAPKAPK3	MAP kinase-activated protein kinase 3 OS=Homo sapiens OX=9606 GN=MAPKAPK3 PE=1 SV=1	42.987	382	1.25638	0.329271	0.248763	0.990959	4	19.9465	20.0561	19.4749	19.8691
Q9GZU1	MCLN1_HUMAN	MCOLN1	Mucolipin-1 OS=Homo sapiens OX=9606 GN=MCOLN1 PE=1 SV=1	65.022	580	1.25595	0.328773	0.275842	0.990959	4	17.2336	17.2744	17.1457	16.7048
Q86YD5	LRAD3_HUMAN	LDLRAD3	Low-density lipoprotein receptor class A domain-containing protein 3 OS=Homo sapiens OX=9606 GN=LDLRAD3 PE=2 SV=3	37.419	345	1.25533	0.328068	0.526731	0.990959	4	17.2541	16.8318	16.3382	17.0915
P03928	ATP8_HUMAN	MT-ATP8	ATP synthase protein 8 OS=Homo sapiens OX=9606 GN=MT-ATP8 PE=1 SV=1	7.992	68	1.25481	0.327469	0.354218	0.990959	4	21.398	20.9014	20.7069	20.9376
O43613	OX1R_HUMAN	HCRTR1	Orexin receptor type 1 OS=Homo sapiens OX=9606 GN=HCRTR1 PE=1 SV=2	47.536	425	1.25438	0.326976	0.512451	0.990959	4	21.6719	21.5985	20.8958	21.7207
Q15582	BGH3_HUMAN	TGFBI	Transforming growth factor-beta-induced protein ig-h3 OS=Homo sapiens OX=9606 GN=TGFBI PE=1 SV=1	74.681	683	1.25433	0.326917	0.229887	0.990959	4	15.5565	15.7934	15.1976	15.4985
Q9UJ14	GGT7_HUMAN	GGT7	Glutathione hydrolase 7 OS=Homo sapiens OX=9606 GN=GGT7 PE=1 SV=2	70.467	662	1.25363	0.326115	0.723606	0.990959	4	15.7371	14.9038	15.6794	14.3093
O95049	ZO3_HUMAN	TJP3	Tight junction protein ZO-3 OS=Homo sapiens OX=9606 GN=TJP3 PE=1 SV=3	101.397	919	1.25302	0.325414	0.110455	0.990959	4	16.6657	16.49	16.3315	16.1734
Q08AF3	SLFN5_HUMAN	SLFN5	Schlafen family member 5 OS=Homo sapiens OX=9606 GN=SLFN5 PE=1 SV=1	101.055	891	1.25215	0.324409	0.572183	0.990959	4	17.4703	16.671	16.4721	17.0204
O75071	EFC14_HUMAN	EFCAB14	EF-hand calcium-binding domain-containing protein 14 OS=Homo sapiens OX=9606 GN=EFCAB14 PE=1 SV=1	55.031	495	1.2514	0.323545	0.457445	0.990959	4	16.7928	16.1909	16.3552	15.9815
Q6MZQ0	PRR5L_HUMAN	PRR5L	Proline-rich protein 5-like OS=Homo sapiens OX=9606 GN=PRR5L PE=1 SV=2	40.836	368	1.25122	0.32333	0.280283	0.990959	4	17.8087	17.6631	17.2044	17.6207
Q9Y6K0	CEPT1_HUMAN	CEPT1	Choline/ethanolaminephosphotransferase 1 OS=Homo sapiens OX=9606 GN=CEPT1 PE=1 SV=1	46.554	416	1.25083	0.322888	0.452792	0.990959	4	18.0364	18.5917	17.7793	18.2029
Q01968	OCRL_HUMAN	OCRL	Inositol polyphosphate 5-phosphatase OCRL OS=Homo sapiens OX=9606 GN=OCRL PE=1 SV=3	104.205	901	1.25075	0.322799	0.0208896	0.990959	4	18.3192	18.3318	18.0497	17.9557
Q12979	ABR_HUMAN	ABR	Active breakpoint cluster region-related protein OS=Homo sapiens OX=9606 GN=ABR PE=1 SV=2	97.598	859	1.25019	0.32215	0.037342	0.990959	4	17.8828	17.7607	17.4802	17.5191
Q6ZRQ5	MMS22_HUMAN	MMS22L	Protein MMS22-like OS=Homo sapiens OX=9606 GN=MMS22L PE=1 SV=3	142.321	1243	1.24928	0.321099	0.534981	0.990959	4	17.0615	16.9453	16.254	17.1106
Q9NTJ4	MA2C1_HUMAN	MAN2C1	Alpha-mannosidase 2C1 OS=Homo sapiens OX=9606 GN=MAN2C1 PE=1 SV=1	115.835	1040	1.24846	0.320154	0.515923	0.990959	4	15.0834	15.0907	14.3577	15.1761
P56211	ARP19_HUMAN	ARPP19	cAMP-regulated phosphoprotein 19 OS=Homo sapiens OX=9606 GN=ARPP19 PE=1 SV=2	12.323	112	1.2457	0.316962	0.405103	0.990959	4	20.7965	20.6577	20.1154	20.7049
P28300	LYOX_HUMAN	LOX	Protein-lysine 6-oxidase OS=Homo sapiens OX=9606 GN=LOX PE=1 SV=2	46.944	417	1.24544	0.316656	0.492515	0.990959	4	18.2288	17.6896	17.9106	17.3745
Q8N5L8	RP25L_HUMAN	RPP25L	Ribonuclease P protein subunit p25-like protein OS=Homo sapiens OX=9606 GN=RPP25L PE=1 SV=1	17.631	163	1.24516	0.316327	0.258732	0.990959	4	17.7301	17.6195	17.1637	17.5533
P46736	BRCC3_HUMAN	BRCC3	Lys-63-specific deubiquitinase BRCC36 OS=Homo sapiens OX=9606 GN=BRCC3 PE=1 SV=2	36.072	316	1.24371	0.314655	0.227747	0.990959	4	18.8679	18.848	18.3606	18.7261
Q8IWE5	PKHM2_HUMAN	PLEKHM2	Pleckstrin homology domain-containing family M member 2 OS=Homo sapiens OX=9606 GN=PLEKHM2 PE=1 SV=2	112.78	1019	1.24366	0.314595	0.106927	0.990959	4	16.315	16.4217	15.9552	16.1523
Q9Y421	FA32A_HUMAN	FAM32A	Protein FAM32A OS=Homo sapiens OX=9606 GN=FAM32A PE=1 SV=2	13.178	112	1.24353	0.314438	0.443204	0.990959	4	18.6855	18.0901	17.9271	18.2196
P29034	S10A2_HUMAN	S100A2	Protein S100-A2 OS=Homo sapiens OX=9606 GN=S100A2 PE=1 SV=3	11.117	98	1.24319	0.314044	0.255301	0.990959	4	19.3408	19.4453	19.271	18.887
Q9Y4D2	DGLA_HUMAN	DAGLA	Diacylglycerol lipase-alpha OS=Homo sapiens OX=9606 GN=DAGLA PE=1 SV=3	114.952	1042	1.24303	0.313858	0.610592	0.990959	4	17.557	18.0872	17.0551	17.9613
Q68D10	SPT2_HUMAN	SPTY2D1	Protein SPT2 homolog OS=Homo sapiens OX=9606 GN=SPTY2D1 PE=1 SV=3	75.599	685	1.24275	0.313537	0.147778	0.990959	4	18.4115	18.1417	17.9451	17.981
P41221	WNT5A_HUMAN	WNT5A	Protein Wnt-5a OS=Homo sapiens OX=9606 GN=WNT5A PE=1 SV=2	42.339	380	1.24251	0.313252	0.375489	0.990959	4	16.9166	17.3777	16.9875	16.6803
P82909	RT36_HUMAN	MRPS36	28S ribosomal protein S36, mitochondrial OS=Homo sapiens OX=9606 GN=MRPS36 PE=1 SV=2	11.466	103	1.24135	0.31191	0.604286	0.990959	4	19.8765	19.4549	18.8874	19.8202
P51692	STA5B_HUMAN	STAT5B	Signal transducer and activator of transcription 5B OS=Homo sapiens OX=9606 GN=STAT5B PE=1 SV=2	89.866	787	1.24074	0.311202	0.440272	0.990959	4	18.1127	18.3073	17.5879	18.2097
P84022	SMAD3_HUMAN	SMAD3	Mothers against decapentaplegic homolog 3 OS=Homo sapiens OX=9606 GN=SMAD3 PE=1 SV=1	48.081	425	1.24056	0.310986	0.691574	0.990959	4	16.0431	14.9806	15.6225	14.7793
Q9ULC4	MCTS1_HUMAN	MCTS1	Malignant T-cell-amplified sequence 1 OS=Homo sapiens OX=9606 GN=MCTS1 PE=1 SV=1	20.555	181	1.24043	0.310842	0.489328	0.990959	4	21.8674	21.4868	21.0489	21.6836
Q96B97	SH3K1_HUMAN	SH3KBP1	SH3 domain-containing kinase-binding protein 1 OS=Homo sapiens OX=9606 GN=SH3KBP1 PE=1 SV=2	73.126	665	1.24008	0.310435	0.0306674	0.990959	4	17.8997	17.9141	17.6517	17.5413
Q8NEZ3	WDR19_HUMAN	WDR19	WD repeat-containing protein 19 OS=Homo sapiens OX=9606 GN=WDR19 PE=1 SV=2	151.581	1342	1.23979	0.310101	0.281521	0.990959	4	17.1073	17.4795	16.8812	17.0854
P31431	SDC4_HUMAN	SDC4	Syndecan-4 OS=Homo sapiens OX=9606 GN=SDC4 PE=1 SV=2	21.642	198	1.23932	0.309552	0.0695842	0.990959	4	18.863	18.8056	18.4435	18.6061
Q66K64	DCA15_HUMAN	DCAF15	DDB1- and CUL4-associated factor 15 OS=Homo sapiens OX=9606 GN=DCAF15 PE=1 SV=1	66.463	600	1.23897	0.30914	0.296176	0.990959	4	16.2567	16.6848	16.2149	16.1083
Q8IWF2	FXRD2_HUMAN	FOXRED2	FAD-dependent oxidoreductase domain-containing protein 2 OS=Homo sapiens OX=9606 GN=FOXRED2 PE=1 SV=1	77.791	684	1.23886	0.309018	0.138935	0.990959	4	17.2492	17.0167	16.768	16.88
Q86SR1	GLT10_HUMAN	GALNT10	Polypeptide N-acetylgalactosaminyltransferase 10 OS=Homo sapiens OX=9606 GN=GALNT10 PE=1 SV=2	68.992	603	1.23871	0.308834	0.08802	0.990959	4	16.0087	16.0795	15.8269	15.6437
Q9HCK1	ZDBF2_HUMAN	ZDBF2	DBF4-type zinc finger-containing protein 2 OS=Homo sapiens OX=9606 GN=ZDBF2 PE=1 SV=3	265.618	2354	1.23833	0.308399	0.276107	0.990959	4	15.2797	14.9543	14.9379	14.6793
Q8NDI1	EHBP1_HUMAN	EHBP1	EH domain-binding protein 1 OS=Homo sapiens OX=9606 GN=EHBP1 PE=1 SV=3	140.017	1231	1.2382	0.308246	0.0107055	0.990959	4	19.1653	19.1138	18.8121	18.8506
Q53S08	RAB6D_HUMAN	RAB6D	Ras-related protein Rab-6D OS=Homo sapiens OX=9606 GN=RAB6D PE=2 SV=1	28.242	254	1.23792	0.30792	0.455089	0.990959	4	19.0913	18.6489	18.3105	18.8138
Q6PGQ7	BORA_HUMAN	BORA	Protein aurora borealis OS=Homo sapiens OX=9606 GN=BORA PE=1 SV=2	61.203	559	1.23786	0.307848	0.62955	0.990959	4	17.5174	17.0235	16.4759	17.4494
Q6P4F7	RHGBA_HUMAN	ARHGAP11A	Rho GTPase-activating protein 11A OS=Homo sapiens OX=9606 GN=ARHGAP11A PE=1 SV=2	113.866	1023	1.23779	0.307767	0.371654	0.990959	4	16.6701	16.7433	16.132	16.6659
Q9BRK4	LZTS2_HUMAN	LZTS2	Leucine zipper putative tumor suppressor 2 OS=Homo sapiens OX=9606 GN=LZTS2 PE=1 SV=2	72.759	669	1.23735	0.307253	0.576909	0.990959	4	16.4582	15.9261	15.5032	16.2666
Q9NP84	TNR12_HUMAN	TNFRSF12A	Tumor necrosis factor receptor superfamily member 12A OS=Homo sapiens OX=9606 GN=TNFRSF12A PE=1 SV=1	13.911	129	1.23728	0.307168	0.0608445	0.990959	4	16.9371	16.7953	16.5948	16.5232
P58317	ZN121_HUMAN	ZNF121	Zinc finger protein 121 OS=Homo sapiens OX=9606 GN=ZNF121 PE=1 SV=2	44.694	390	1.23725	0.307135	0.449279	0.990959	4	14.9634	15.3521	14.585	15.1163
O60237	MYPT2_HUMAN	PPP1R12B	Protein phosphatase 1 regulatory subunit 12B OS=Homo sapiens OX=9606 GN=PPP1R12B PE=1 SV=2	110.404	982	1.23684	0.306656	0.0750099	0.990959	4	16.5806	16.4092	16.164	16.2125
Q9C086	IN80B_HUMAN	INO80B	INO80 complex subunit B OS=Homo sapiens OX=9606 GN=INO80B PE=1 SV=2	38.637	356	1.23599	0.305672	0.608873	0.990959	4	17.7555	17.4302	17.769	16.8053
O43597	SPY2_HUMAN	SPRY2	Protein sprouty homolog 2 OS=Homo sapiens OX=9606 GN=SPRY2 PE=1 SV=1	34.688	315	1.2359	0.305559	0.783153	0.993107	4	15.8475	14.7435	15.7908	14.1891
Q8N5I4	DHRSX_HUMAN	DHRSX	Dehydrogenase/reductase SDR family member on chromosome X OS=Homo sapiens OX=9606 GN=DHRSX PE=1 SV=2	36.443	330	1.2357	0.305327	0.624402	0.990959	4	17.5273	17.2978	17.6274	16.587
Q3MIP1	IPIL2_HUMAN	ITPRIPL2	Inositol 1,4,5-trisphosphate receptor-interacting protein-like 2 OS=Homo sapiens OX=9606 GN=ITPRIPL2 PE=1 SV=1	58.446	535	1.23563	0.305244	0.325602	0.990959	4	19.2102	18.7787	18.7857	18.5928
Q9H3P2	NELFA_HUMAN	NELFA	Negative elongation factor A OS=Homo sapiens OX=9606 GN=NELFA PE=1 SV=3	57.277	528	1.23511	0.304642	0.514841	0.990959	4	19.4479	19.4404	18.7513	19.5278
Q9Y3C7	MED31_HUMAN	MED31	Mediator of RNA polymerase II transcription subunit 31 OS=Homo sapiens OX=9606 GN=MED31 PE=1 SV=1	15.805	131	1.23473	0.304193	0.507852	0.990959	4	17.7836	17.2359	16.9414	17.4696
P00519	ABL1_HUMAN	ABL1	Tyrosine-protein kinase ABL1 OS=Homo sapiens OX=9606 GN=ABL1 PE=1 SV=4	122.873	1130	1.23431	0.303706	0.172373	0.990959	4	16.9067	17.0947	16.8082	16.5858
O14561	ACPM_HUMAN	NDUFAB1	Acyl carrier protein, mitochondrial OS=Homo sapiens OX=9606 GN=NDUFAB1 PE=1 SV=3	17.417	156	1.23406	0.303416	0.529202	0.990959	4	20.6828	20.8604	20.076	20.8603
P32322	P5CR1_HUMAN	PYCR1	Pyrroline-5-carboxylate reductase 1, mitochondrial OS=Homo sapiens OX=9606 GN=PYCR1 PE=1 SV=2	33.361	319	1.23347	0.302718	0.609436	0.990959	4	19.8666	19.6693	18.9704	19.96
Q6ZWT7	MBOA2_HUMAN	MBOAT2	Lysophospholipid acyltransferase 2 OS=Homo sapiens OX=9606 GN=MBOAT2 PE=1 SV=2	59.527	520	1.23307	0.302254	0.355593	0.990959	4	16.1572	16.5297	16.2134	15.8691
O00462	MANBA_HUMAN	MANBA	Beta-mannosidase OS=Homo sapiens OX=9606 GN=MANBA PE=1 SV=3	100.895	879	1.23282	0.301962	0.487114	0.990959	4	17.8905	17.8153	17.1955	17.9063
P37287	PIGA_HUMAN	PIGA	Phosphatidylinositol N-acetylglucosaminyltransferase subunit A OS=Homo sapiens OX=9606 GN=PIGA PE=1 SV=1	54.127	484	1.23266	0.301772	0.135644	0.990959	4	16.4276	16.2263	15.9524	16.0979
Q684P5	RPGP2_HUMAN	RAP1GAP2	Rap1 GTPase-activating protein 2 OS=Homo sapiens OX=9606 GN=RAP1GAP2 PE=1 SV=2	80.056	730	1.23263	0.301736	0.389279	0.990959	4	16.0612	16.3972	15.7077	16.1473
Q99640	PMYT1_HUMAN	PKMYT1	Membrane-associated tyrosine- and threonine-specific cdc2-inhibitory kinase OS=Homo sapiens OX=9606 GN=PKMYT1 PE=1 SV=1	54.521	499	1.23219	0.301222	0.0864518	0.990959	4	18.7252	18.7765	18.3583	18.5409
O15534	PER1_HUMAN	PER1	Period circadian protein homolog 1 OS=Homo sapiens OX=9606 GN=PER1 PE=1 SV=2	136.212	1290	1.23214	0.301167	0.331901	0.990959	4	17.0682	16.8292	16.8524	16.4427
P0DJD0	RGPD1_HUMAN	RGPD1	RANBP2-like and GRIP domain-containing protein 1 OS=Homo sapiens OX=9606 GN=RGPD1 PE=2 SV=1	196.662	1748	1.23199	0.300994	0.124334	0.990959	4	15.3451	15.2465	14.8883	15.1013
Q9NUM3	S39A9_HUMAN	SLC39A9	Zinc transporter ZIP9 OS=Homo sapiens OX=9606 GN=SLC39A9 PE=1 SV=2	32.251	307	1.23177	0.300728	0.454217	0.990959	4	14.9151	15.0522	15.0022	14.3638
Q9H8G2	CAAP1_HUMAN	CAAP1	Caspase activity and apoptosis inhibitor 1 OS=Homo sapiens OX=9606 GN=CAAP1 PE=1 SV=2	38.368	361	1.23141	0.300311	0.561335	0.990959	4	18.6563	18.7335	17.9612	18.8279
Q8TE82	S3TC1_HUMAN	SH3TC1	SH3 domain and tetratricopeptide repeat-containing protein 1 OS=Homo sapiens OX=9606 GN=SH3TC1 PE=1 SV=3	146.961	1336	1.23112	0.299974	0.180157	0.990959	4	17.0797	17.0587	16.6215	16.917
Q9BPZ7	SIN1_HUMAN	MAPKAP1	Target of rapamycin complex 2 subunit MAPKAP1 OS=Homo sapiens OX=9606 GN=MAPKAP1 PE=1 SV=2	59.123	522	1.23107	0.299912	0.18663	0.990959	4	17.283	17.0048	16.7836	16.9044
Q6P444	MTFR2_HUMAN	MTFR2	Mitochondrial fission regulator 2 OS=Homo sapiens OX=9606 GN=MTFR2 PE=1 SV=2	43.384	385	1.23101	0.299838	0.308767	0.990959	4	16.4501	16.4103	15.9096	16.3511
Q9BU02	THTPA_HUMAN	THTPA	Thiamine-triphosphatase OS=Homo sapiens OX=9606 GN=THTPA PE=1 SV=3	25.566	230	1.231	0.299826	0.31753	0.990959	4	18.9844	19.0589	18.9458	18.4979
Q96BM9	ARL8A_HUMAN	ARL8A	ADP-ribosylation factor-like protein 8A OS=Homo sapiens OX=9606 GN=ARL8A PE=1 SV=1	21.416	186	1.23079	0.299587	0.355705	0.990959	4	19.7828	19.406	19.1283	19.4614
O95848	NUD14_HUMAN	NUDT14	Uridine diphosphate glucose pyrophosphatase NUDT14 OS=Homo sapiens OX=9606 GN=NUDT14 PE=1 SV=2	24.118	222	1.23072	0.299498	0.507048	0.990959	4	15.7779	15.0437	15.0409	15.1817
Q13257	MD2L1_HUMAN	MAD2L1	Mitotic spindle assembly checkpoint protein MAD2A OS=Homo sapiens OX=9606 GN=MAD2L1 PE=1 SV=1	23.51	205	1.23021	0.298908	0.523867	0.990959	4	22.0592	21.9833	21.3338	22.1109
Q12770	SCAP_HUMAN	SCAP	Sterol regulatory element-binding protein cleavage-activating protein OS=Homo sapiens OX=9606 GN=SCAP PE=1 SV=4	139.729	1279	1.22948	0.298048	0.0671904	0.990959	4	16.6358	16.7986	16.4189	16.4193
Q9H237	PORCN_HUMAN	PORCN	Protein-serine O-palmitoleoyltransferase porcupine OS=Homo sapiens OX=9606 GN=PORCN PE=1 SV=2	52.318	461	1.22921	0.297731	0.422609	0.990959	4	18.6777	18.1798	17.9677	18.2943
Q9NV92	NFIP2_HUMAN	NDFIP2	NEDD4 family-interacting protein 2 OS=Homo sapiens OX=9606 GN=NDFIP2 PE=1 SV=2	36.39	336	1.2292	0.297723	0.283342	0.990959	4	18.8369	19.2022	18.629	18.8146
Q16637	SMN_HUMAN	SMN1	Survival motor neuron protein OS=Homo sapiens OX=9606 GN=SMN1 PE=1 SV=1	31.849	294	1.22881	0.297257	0.312418	0.990959	4	21.7374	21.3026	21.1781	21.2674
Q92506	DHB8_HUMAN	HSD17B8	Estradiol 17-beta-dehydrogenase 8 OS=Homo sapiens OX=9606 GN=HSD17B8 PE=1 SV=2	26.974	261	1.22875	0.297187	0.230665	0.990959	4	18.0311	18.064	17.5767	17.9241
Q8IXU6	S35F2_HUMAN	SLC35F2	Solute carrier family 35 member F2 OS=Homo sapiens OX=9606 GN=SLC35F2 PE=1 SV=1	41.212	374	1.22874	0.297176	0.217278	0.990959	4	17.1867	17.1827	17.0546	16.7204
Q9BRQ6	MIC25_HUMAN	CHCHD6	MICOS complex subunit MIC25 OS=Homo sapiens OX=9606 GN=CHCHD6 PE=1 SV=1	26.458	235	1.2281	0.29643	0.112752	0.990959	4	20.2054	20.0144	19.866	19.761
Q6ZNG1	ZN600_HUMAN	ZNF600	Zinc finger protein 600 OS=Homo sapiens OX=9606 GN=ZNF600 PE=1 SV=2	83.124	722	1.2274	0.295608	0.467811	0.990959	4	15.9397	16.2951	15.5408	16.1029
Q5T2E6	ARMD3_HUMAN	ARMH3	Armadillo-like helical domain-containing protein 3 OS=Homo sapiens OX=9606 GN=ARMH3 PE=1 SV=1	78.71	689	1.22714	0.295302	0.563013	0.990959	4	18.0948	17.9837	17.3177	18.1701
Q07820	MCL1_HUMAN	MCL1	Induced myeloid leukemia cell differentiation protein Mcl-1 OS=Homo sapiens OX=9606 GN=MCL1 PE=1 SV=3	37.337	350	1.22665	0.294725	0.704918	0.990959	4	16.8717	17.3937	17.4602	16.2157
Q06136	KDSR_HUMAN	KDSR	3-ketodihydrosphingosine reductase OS=Homo sapiens OX=9606 GN=KDSR PE=1 SV=1	36.187	332	1.22497	0.292747	0.351537	0.990959	4	20.3806	20.1791	20.2083	19.766
Q99956	DUS9_HUMAN	DUSP9	Dual specificity protein phosphatase 9 OS=Homo sapiens OX=9606 GN=DUSP9 PE=1 SV=1	41.868	384	1.22482	0.292569	0.0401781	0.990959	4	17.5279	17.4751	17.1545	17.2633
P53350	PLK1_HUMAN	PLK1	Serine/threonine-protein kinase PLK1 OS=Homo sapiens OX=9606 GN=PLK1 PE=1 SV=1	68.255	603	1.22465	0.292365	0.231716	0.990959	4	20.0307	19.747	19.4987	19.6942
P35914	HMGCL_HUMAN	HMGCL	Hydroxymethylglutaryl-CoA lyase, mitochondrial OS=Homo sapiens OX=9606 GN=HMGCL PE=1 SV=2	34.36	325	1.22375	0.291307	0.348304	0.990959	4	18.175	18.4945	17.8646	18.2222
L0R6Q1	S35U4_HUMAN	SLC35A4	SLC35A4 upstream open reading frame protein OS=Homo sapiens OX=9606 GN=SLC35A4 PE=3 SV=1	11.133	103	1.2236	0.291132	0.310623	0.990959	4	21.2009	20.9377	20.6065	20.9499
P25391	LAMA1_HUMAN	LAMA1	Laminin subunit alpha-1 OS=Homo sapiens OX=9606 GN=LAMA1 PE=1 SV=2	337.084	3075	1.2214	0.288533	0.260032	0.990959	4	19.7661	19.9475	19.7301	19.4065
P03915	NU5M_HUMAN	MT-ND5	NADH-ubiquinone oxidoreductase chain 5 OS=Homo sapiens OX=9606 GN=MT-ND5 PE=1 SV=2	67.027	603	1.22089	0.287937	0.349856	0.990959	4	19.4562	19.5296	18.9699	19.44
O75925	PIAS1_HUMAN	PIAS1	E3 SUMO-protein ligase PIAS1 OS=Homo sapiens OX=9606 GN=PIAS1 PE=1 SV=2	71.836	651	1.22026	0.287183	0.548894	0.990959	4	17.765	18.0129	17.9839	17.2196
Q96LA8	ANM6_HUMAN	PRMT6	Protein arginine N-methyltransferase 6 OS=Homo sapiens OX=9606 GN=PRMT6 PE=1 SV=1	41.938	375	1.22021	0.287133	0.0631688	0.990959	4	18.9881	18.9201	18.5992	18.7347
Q8WUR7	CO040_HUMAN	C15orf40	UPF0235 protein C15orf40 OS=Homo sapiens OX=9606 GN=C15orf40 PE=1 SV=2	16.353	153	1.21972	0.286548	0.746974	0.990959	4	18.7015	18.3665	17.491	19.0038
Q9HCJ1	ANKH_HUMAN	ANKH	Progressive ankylosis protein homolog OS=Homo sapiens OX=9606 GN=ANKH PE=2 SV=2	54.241	492	1.21956	0.286364	0.241844	0.990959	4	17.2476	17.0026	16.7149	16.9625
Q92599	SEPT8_HUMAN	SEPTIN8	Septin-8 OS=Homo sapiens OX=9606 GN=SEPTIN8 PE=1 SV=4	55.756	483	1.21926	0.286001	0.222206	0.990959	4	19.9496	19.8557	19.4601	19.7732
Q8NCC3	PAG15_HUMAN	PLA2G15	Phospholipase A2 group XV OS=Homo sapiens OX=9606 GN=PLA2G15 PE=1 SV=2	46.658	412	1.21854	0.285151	0.717314	0.990959	4	18.0406	17.2793	16.8062	17.9433
O75113	N4BP1_HUMAN	N4BP1	NEDD4-binding protein 1 OS=Homo sapiens OX=9606 GN=N4BP1 PE=1 SV=4	100.379	896	1.21852	0.285127	0.342508	0.990959	4	18.7931	18.5313	18.1867	18.5675
Q96S99	PKHF1_HUMAN	PLEKHF1	Pleckstrin homology domain-containing family F member 1 OS=Homo sapiens OX=9606 GN=PLEKHF1 PE=1 SV=3	31.195	279	1.21839	0.28497	0.322551	0.990959	4	19.2676	19.1077	18.699	19.1064
Q86XN6	ZN761_HUMAN	ZNF761	Zinc finger protein 761 OS=Homo sapiens OX=9606 GN=ZNF761 PE=1 SV=3	87.716	746	1.21827	0.284831	0.427981	0.990959	4	16.3659	16.0979	15.6913	16.2029
Q8N3V7	SYNPO_HUMAN	SYNPO	Synaptopodin OS=Homo sapiens OX=9606 GN=SYNPO PE=1 SV=2	99.463	929	1.21802	0.284538	0.161755	0.990959	4	18.9744	19.2072	18.7464	18.8661
O75901	RASF9_HUMAN	RASSF9	Ras association domain-containing protein 9 OS=Homo sapiens OX=9606 GN=RASSF9 PE=2 SV=2	50.021	435	1.21775	0.284216	0.244048	0.990959	4	16.562	16.4698	16.0638	16.3995
P00414	COX3_HUMAN	MT-CO3	Cytochrome c oxidase subunit 3 OS=Homo sapiens OX=9606 GN=MT-CO3 PE=1 SV=2	29.951	261	1.21744	0.283851	0.382041	0.990959	4	20.5956	20.3765	19.9715	20.4329
Q9BYE7	PCGF6_HUMAN	PCGF6	Polycomb group RING finger protein 6 OS=Homo sapiens OX=9606 GN=PCGF6 PE=1 SV=2	39.047	350	1.21719	0.283556	0.0775084	0.990959	4	17.6789	17.5163	17.3349	17.2932
P10909	CLUS_HUMAN	CLU	Clusterin OS=Homo sapiens OX=9606 GN=CLU PE=1 SV=1	52.495	449	1.21692	0.28323	0.024379	0.990959	4	18.4167	18.4791	18.1972	18.1322
O14770	MEIS2_HUMAN	MEIS2	Homeobox protein Meis2 OS=Homo sapiens OX=9606 GN=MEIS2 PE=1 SV=2	51.79	477	1.21623	0.28242	0.705436	0.990959	4	17.8498	18.0821	18.3209	17.0462
Q7Z4W1	DCXR_HUMAN	DCXR	L-xylulose reductase OS=Homo sapiens OX=9606 GN=DCXR PE=1 SV=2	25.913	244	1.21533	0.281347	0.196431	0.990959	4	19.7828	19.6219	19.2975	19.5445
Q9HBF4	ZFYV1_HUMAN	ZFYVE1	Zinc finger FYVE domain-containing protein 1 OS=Homo sapiens OX=9606 GN=ZFYVE1 PE=1 SV=1	87.176	777	1.21521	0.28121	0.208505	0.990959	4	15.8228	15.8714	15.4143	15.7175
Q96BD8	SKA1_HUMAN	SKA1	Spindle and kinetochore-associated protein 1 OS=Homo sapiens OX=9606 GN=SKA1 PE=1 SV=1	29.484	255	1.21509	0.281059	0.32417	0.990959	4	16.6743	16.4858	16.1038	16.4942
Q9HAB3	S52A2_HUMAN	SLC52A2	Solute carrier family 52, riboflavin transporter, member 2 OS=Homo sapiens OX=9606 GN=SLC52A2 PE=1 SV=1	45.777	445	1.2146	0.280477	0.185111	0.990959	4	19.7456	19.4634	19.3251	19.3229
Q9NYB9	ABI2_HUMAN	ABI2	Abl interactor 2 OS=Homo sapiens OX=9606 GN=ABI2 PE=1 SV=1	55.663	513	1.21435	0.28019	0.71142	0.990959	4	17.7249	17.737	16.7935	18.1081
Q8ND82	Z280C_HUMAN	ZNF280C	Zinc finger protein 280C OS=Homo sapiens OX=9606 GN=ZNF280C PE=1 SV=1	83.096	737	1.21402	0.279786	0.358499	0.990959	4	17.5725	17.7646	17.1725	17.6049
P39019	RS19_HUMAN	RPS19	40S ribosomal protein S19 OS=Homo sapiens OX=9606 GN=RPS19 PE=1 SV=2	16.061	145	1.21369	0.279399	0.0904818	0.990959	4	25.1241	25.1301	24.7574	24.9379
P01033	TIMP1_HUMAN	TIMP1	Metalloproteinase inhibitor 1 OS=Homo sapiens OX=9606 GN=TIMP1 PE=1 SV=1	23.171	207	1.21321	0.278835	0.297535	0.990959	4	18.4517	18.6318	18.0846	18.4413
Q9HCM4	E41L5_HUMAN	EPB41L5	Band 4.1-like protein 5 OS=Homo sapiens OX=9606 GN=EPB41L5 PE=1 SV=3	81.856	733	1.21292	0.278484	0.569343	0.990959	4	18.5053	18.4629	17.7935	18.6178
P53680	AP2S1_HUMAN	AP2S1	AP-2 complex subunit sigma OS=Homo sapiens OX=9606 GN=AP2S1 PE=1 SV=2	17.018	142	1.2129	0.278462	0.330076	0.990959	4	22.093	22.02	21.5629	21.9932
Q9H0U4	RAB1B_HUMAN	RAB1B	Ras-related protein Rab-1B OS=Homo sapiens OX=9606 GN=RAB1B PE=1 SV=1	22.171	201	1.21243	0.277898	0.369714	0.990959	4	20.6349	20.3158	20.0154	20.3794
Q8NB78	KDM1B_HUMAN	KDM1B	Lysine-specific histone demethylase 1B OS=Homo sapiens OX=9606 GN=KDM1B PE=1 SV=3	92.098	822	1.21215	0.277568	0.650226	0.990959	4	17.3462	17.2011	17.5167	16.4754
Q86XK2	FBX11_HUMAN	FBXO11	F-box only protein 11 OS=Homo sapiens OX=9606 GN=FBXO11 PE=1 SV=3	103.585	927	1.21208	0.277491	0.740722	0.990959	4	16.3477	15.2113	15.9618	15.0423
Q9H7M9	VISTA_HUMAN	VSIR	V-type immunoglobulin domain-containing suppressor of T-cell activation OS=Homo sapiens OX=9606 GN=VSIR PE=1 SV=3	33.908	311	1.21168	0.277007	0.527009	0.990959	4	18.089	17.8845	18.06	17.3595
Q9Y3E7	CHMP3_HUMAN	CHMP3	Charged multivesicular body protein 3 OS=Homo sapiens OX=9606 GN=CHMP3 PE=1 SV=3	25.073	222	1.2116	0.276911	0.809122	0.993107	4	20.2839	19.7271	20.6963	18.7609
Q15906	VPS72_HUMAN	VPS72	Vacuolar protein sorting-associated protein 72 homolog OS=Homo sapiens OX=9606 GN=VPS72 PE=1 SV=1	40.594	364	1.21113	0.276348	0.513771	0.990959	4	18.2218	18.8493	18.1014	18.4169
Q8N4T8	CBR4_HUMAN	CBR4	Carbonyl reductase family member 4 OS=Homo sapiens OX=9606 GN=CBR4 PE=1 SV=3	25.301	237	1.2111	0.276322	0.442759	0.990959	4	17.9395	18.0185	17.9912	17.4142
Q9H813	PACC1_HUMAN	PACC1	Proton-activated chloride channel OS=Homo sapiens OX=9606 GN=PACC1 PE=1 SV=1	40.043	350	1.2111	0.276312	0.551412	0.990959	4	17.9265	17.8229	17.9842	17.2126
Q9H015	S22A4_HUMAN	SLC22A4	Solute carrier family 22 member 4 OS=Homo sapiens OX=9606 GN=SLC22A4 PE=1 SV=3	62.155	551	1.211	0.276203	0.715728	0.990959	4	17.2944	16.6547	16.1225	17.2742
P84090	ERH_HUMAN	ERH	Enhancer of rudimentary homolog OS=Homo sapiens OX=9606 GN=ERH PE=1 SV=1	12.259	104	1.21049	0.275587	0.43965	0.990959	4	24.8199	24.3912	24.5223	24.1375
Q96ME1	FXL18_HUMAN	FBXL18	F-box/LRR-repeat protein 18 OS=Homo sapiens OX=9606 GN=FBXL18 PE=1 SV=2	88.341	805	1.20979	0.274761	0.282547	0.990959	4	19.686	19.3166	19.1883	19.2648
P05141	ADT2_HUMAN	SLC25A5	ADP/ATP translocase 2 OS=Homo sapiens OX=9606 GN=SLC25A5 PE=1 SV=7	32.852	298	1.20963	0.27457	0.397537	0.990959	4	24.5093	24.3444	23.9086	24.3959
Q9UKI8	TLK1_HUMAN	TLK1	Serine/threonine-protein kinase tousled-like 1 OS=Homo sapiens OX=9606 GN=TLK1 PE=1 SV=2	86.7	766	1.20956	0.27448	0.231335	0.990959	4	17.9219	17.8685	17.4614	17.78
Q69YN2	C19L1_HUMAN	CWF19L1	CWF19-like protein 1 OS=Homo sapiens OX=9606 GN=CWF19L1 PE=1 SV=2	60.619	538	1.20931	0.274189	0.0389669	0.990959	4	19.6876	19.7104	19.3702	19.4794
P42771	CDN2A_HUMAN	CDKN2A	Cyclin-dependent kinase inhibitor 2A OS=Homo sapiens OX=9606 GN=CDKN2A PE=1 SV=2	16.533	156	1.209	0.27382	0.480045	0.990959	4	22.3723	22.272	21.7343	22.3625
Q7Z6J0	SH3R1_HUMAN	SH3RF1	E3 ubiquitin-protein ligase SH3RF1 OS=Homo sapiens OX=9606 GN=SH3RF1 PE=1 SV=2	93.129	888	1.20894	0.273745	0.447306	0.990959	4	16.7577	17.3343	16.8176	16.7268
P40425	PBX2_HUMAN	PBX2	Pre-B-cell leukemia transcription factor 2 OS=Homo sapiens OX=9606 GN=PBX2 PE=1 SV=2	45.881	430	1.20891	0.27371	0.45426	0.990959	4	17.5752	17.2865	17.4169	16.8974
Q9BZD2	S29A3_HUMAN	SLC29A3	Equilibrative nucleoside transporter 3 OS=Homo sapiens OX=9606 GN=SLC29A3 PE=1 SV=3	51.815	475	1.20868	0.273431	0.485409	0.990959	4	16.4712	16.465	15.8725	16.5168
Q9HA92	RSAD1_HUMAN	RSAD1	Radical S-adenosyl methionine domain-containing protein 1, mitochondrial OS=Homo sapiens OX=9606 GN=RSAD1 PE=1 SV=2	48.714	442	1.20793	0.272535	0.32028	0.990959	4	16.7857	16.5777	16.2291	16.5893
Q8IYS8	BD1L2_HUMAN	BOD1L2	Biorientation of chromosomes in cell division protein 1-like 2 OS=Homo sapiens OX=9606 GN=BOD1L2 PE=1 SV=2	18.075	172	1.20777	0.272341	0.567878	0.990959	4	18.2248	18.6594	17.8317	18.5079
P07947	YES_HUMAN	YES1	Tyrosine-protein kinase Yes OS=Homo sapiens OX=9606 GN=YES1 PE=1 SV=3	60.801	543	1.2064	0.270706	0.450489	0.990959	4	20.2718	19.71	19.7963	19.6441
Q9NY26	S39A1_HUMAN	SLC39A1	Zinc transporter ZIP1 OS=Homo sapiens OX=9606 GN=SLC39A1 PE=1 SV=1	34.25	324	1.20628	0.270564	0.507512	0.990959	4	22.5447	22.5348	21.9311	22.6072
Q3MHD2	LSM12_HUMAN	LSM12	Protein LSM12 homolog OS=Homo sapiens OX=9606 GN=LSM12 PE=1 SV=2	21.701	195	1.20601	0.270243	0.571708	0.990959	4	21.5681	21.2987	20.7832	21.5432
Q9Y4F5	C170B_HUMAN	CEP170B	Centrosomal protein of 170 kDa protein B OS=Homo sapiens OX=9606 GN=CEP170B PE=1 SV=4	171.688	1589	1.20589	0.270095	0.0360846	0.990959	4	17.976	17.8847	17.6867	17.6338
P52657	T2AG_HUMAN	GTF2A2	Transcription initiation factor IIA subunit 2 OS=Homo sapiens OX=9606 GN=GTF2A2 PE=1 SV=1	12.457	109	1.20553	0.269664	0.255901	0.990959	4	19.7949	19.4899	19.295	19.4505
O60830	TI17B_HUMAN	TIMM17B	Mitochondrial import inner membrane translocase subunit Tim17-B OS=Homo sapiens OX=9606 GN=TIMM17B PE=1 SV=1	18.273	172	1.20533	0.269428	0.656142	0.990959	4	20.3345	20.312	19.5337	20.574
Q9P0W2	HM20B_HUMAN	HMG20B	SWI/SNF-related matrix-associated actin-dependent regulator of chromatin subfamily E member 1-related OS=Homo sapiens OX=9606 GN=HMG20B PE=1 SV=1	35.813	317	1.20497	0.269	0.217004	0.990959	4	17.6911	17.3898	17.2835	17.2594
Q86VX9	MON1A_HUMAN	MON1A	Vacuolar fusion protein MON1 homolog A OS=Homo sapiens OX=9606 GN=MON1A PE=1 SV=3	72.895	652	1.20496	0.268985	0.167035	0.990959	4	17.0168	17.2675	16.8576	16.8888
Q92545	TM131_HUMAN	TMEM131	Transmembrane protein 131 OS=Homo sapiens OX=9606 GN=TMEM131 PE=1 SV=3	205.138	1883	1.20485	0.268858	0.0929016	0.990959	4	18.5862	18.4372	18.1956	18.2901
Q9UHA3	RLP24_HUMAN	RSL24D1	Probable ribosome biogenesis protein RLP24 OS=Homo sapiens OX=9606 GN=RSL24D1 PE=1 SV=1	19.621	163	1.20463	0.26859	0.163192	0.990959	4	22.2921	22.1653	21.8533	22.067
O60921	HUS1_HUMAN	HUS1	Checkpoint protein HUS1 OS=Homo sapiens OX=9606 GN=HUS1 PE=1 SV=1	31.691	280	1.20455	0.268495	0.0848763	0.990959	4	19.3843	19.5486	19.2137	19.1823
Q9H6A9	PCX3_HUMAN	PCNX3	Pecanex-like protein 3 OS=Homo sapiens OX=9606 GN=PCNX3 PE=1 SV=2	222.039	2034	1.20428	0.268172	0.0031537	0.823132	4	17.0918	17.0871	16.8063	16.8362
Q64LD2	WDR25_HUMAN	WDR25	WD repeat-containing protein 25 OS=Homo sapiens OX=9606 GN=WDR25 PE=1 SV=3	60.161	544	1.20413	0.267987	0.308507	0.990959	4	15.9757	15.5801	15.5021	15.5178
Q5TC84	OGRL1_HUMAN	OGFRL1	Opioid growth factor receptor-like protein 1 OS=Homo sapiens OX=9606 GN=OGFRL1 PE=2 SV=1	51.252	451	1.204	0.267836	0.547223	0.990959	4	15.2053	15.0827	15.2441	14.5083
Q7Z3E5	ARMC9_HUMAN	ARMC9	LisH domain-containing protein ARMC9 OS=Homo sapiens OX=9606 GN=ARMC9 PE=1 SV=3	91.819	818	1.20386	0.267669	0.407075	0.990959	4	16.8197	17.3232	16.8556	16.7519
Q5VT25	MRCKA_HUMAN	CDC42BPA	Serine/threonine-protein kinase MRCK alpha OS=Homo sapiens OX=9606 GN=CDC42BPA PE=1 SV=1	197.307	1732	1.20366	0.267424	0.158968	0.990959	4	19.5659	19.3339	19.219	19.1459
Q9NP66	HM20A_HUMAN	HMG20A	High mobility group protein 20A OS=Homo sapiens OX=9606 GN=HMG20A PE=1 SV=1	40.144	347	1.20317	0.266837	0.34711	0.990959	4	19.3126	19.0546	18.7399	19.0936
P67812	SC11A_HUMAN	SEC11A	Signal peptidase complex catalytic subunit SEC11A OS=Homo sapiens OX=9606 GN=SEC11A PE=1 SV=1	20.625	179	1.20312	0.266786	0.490312	0.990959	4	22.931	22.4122	22.2201	22.5896
P34913	HYES_HUMAN	EPHX2	Bifunctional epoxide hydrolase 2 OS=Homo sapiens OX=9606 GN=EPHX2 PE=1 SV=2	62.616	555	1.2031	0.266761	0.639974	0.990959	4	16.6201	16.6799	15.8954	16.8711
Q9H799	CPLN1_HUMAN	CPLANE1	Ciliogenesis and planar polarity effector 1 OS=Homo sapiens OX=9606 GN=CPLANE1 PE=1 SV=4	361.746	3197	1.20301	0.266652	0.595378	0.990959	4	17.3351	16.7253	17.0612	16.4658
Q32NC0	CR021_HUMAN	C18orf21	UPF0711 protein C18orf21 OS=Homo sapiens OX=9606 GN=C18orf21 PE=1 SV=1	24.827	220	1.20264	0.266211	0.201384	0.990959	4	16.8821	16.9683	16.7941	16.5238
Q96HJ9	FMC1_HUMAN	FMC1	Protein FMC1 homolog OS=Homo sapiens OX=9606 GN=FMC1 PE=1 SV=2	12.749	113	1.20262	0.266177	0.239961	0.990959	4	18.9554	18.7565	18.7163	18.4633
Q8NHS3	MFSD8_HUMAN	MFSD8	Major facilitator superfamily domain-containing protein 8 OS=Homo sapiens OX=9606 GN=MFSD8 PE=1 SV=1	57.628	518	1.20212	0.26558	0.411797	0.990959	4	17.3825	16.89	16.7931	16.9482
Q969S2	NEIL2_HUMAN	NEIL2	Endonuclease 8-like 2 OS=Homo sapiens OX=9606 GN=NEIL2 PE=1 SV=3	36.826	332	1.20209	0.265549	0.223451	0.990959	4	17.0308	16.8682	16.8128	16.5551
Q92551	IP6K1_HUMAN	IP6K1	Inositol hexakisphosphate kinase 1 OS=Homo sapiens OX=9606 GN=IP6K1 PE=1 SV=3	50.236	441	1.20113	0.264389	0.378292	0.990959	4	18.5078	18.2238	17.9135	18.2893
Q14667	K0100_HUMAN	KIAA0100	Protein KIAA0100 OS=Homo sapiens OX=9606 GN=KIAA0100 PE=1 SV=3	253.7	2235	1.20088	0.264098	0.548126	0.990959	4	15.6324	15.6341	15.7378	15.0005
Q96BH1	RNF25_HUMAN	RNF25	E3 ubiquitin-protein ligase RNF25 OS=Homo sapiens OX=9606 GN=RNF25 PE=1 SV=1	51.219	459	1.20077	0.263957	0.392004	0.990959	4	19.0754	19.5407	19.1169	18.9714
Q9UNX3	RL26L_HUMAN	RPL26L1	60S ribosomal protein L26-like 1 OS=Homo sapiens OX=9606 GN=RPL26L1 PE=1 SV=1	17.256	145	1.20076	0.263947	0.777189	0.993107	4	20.626	19.3682	20.2541	19.2122
Q9BWS9	CHID1_HUMAN	CHID1	Chitinase domain-containing protein 1 OS=Homo sapiens OX=9606 GN=CHID1 PE=1 SV=1	44.941	393	1.20047	0.263599	0.226238	0.990959	4	18.8515	19.0916	18.6138	18.8022
Q04756	HGFA_HUMAN	HGFAC	Hepatocyte growth factor activator OS=Homo sapiens OX=9606 GN=HGFAC PE=1 SV=1	70.682	655	1.19986	0.262865	0.673914	0.990959	4	15.5978	16.1606	16.0759	15.1568
Q9NXR8	ING3_HUMAN	ING3	Inhibitor of growth protein 3 OS=Homo sapiens OX=9606 GN=ING3 PE=1 SV=2	46.743	418	1.19929	0.262183	0.704387	0.990959	4	18.9245	17.9755	18.5536	17.822
Q8TAA5	GRPE2_HUMAN	GRPEL2	GrpE protein homolog 2, mitochondrial OS=Homo sapiens OX=9606 GN=GRPEL2 PE=1 SV=1	25.431	225	1.19874	0.261519	0.303773	0.990959	4	18.6553	18.636	18.1937	18.5745
P63167	DYL1_HUMAN	DYNLL1	Dynein light chain 1, cytoplasmic OS=Homo sapiens OX=9606 GN=DYNLL1 PE=1 SV=1	10.366	89	1.19869	0.261458	0.443225	0.990959	4	21.5308	21.5353	20.9958	21.5474
P12882	MYH1_HUMAN	MYH1	Myosin-1 OS=Homo sapiens OX=9606 GN=MYH1 PE=1 SV=3	223.145	1939	1.1982	0.26087	0.657567	0.990959	4	16.6148	17.1269	16.1734	17.0465
Q96HA7	TONSL_HUMAN	TONSL	Tonsoku-like protein OS=Homo sapiens OX=9606 GN=TONSL PE=1 SV=2	150.929	1378	1.19801	0.260644	0.52721	0.990959	4	18.7956	18.6108	18.7734	18.1117
Q9Y5J6	T10B_HUMAN	TIMM10B	Mitochondrial import inner membrane translocase subunit Tim10 B OS=Homo sapiens OX=9606 GN=TIMM10B PE=1 SV=1	11.586	103	1.19797	0.260598	0.372825	0.990959	4	18.4467	18.2105	17.872	18.264
P47974	TISD_HUMAN	ZFP36L2	mRNA decay activator protein ZFP36L2 OS=Homo sapiens OX=9606 GN=ZFP36L2 PE=1 SV=3	51.063	494	1.19783	0.260425	0.446637	0.990959	4	18.9066	19.3145	19.0378	18.6624
P61165	TM258_HUMAN	TMEM258	Transmembrane protein 258 OS=Homo sapiens OX=9606 GN=TMEM258 PE=1 SV=1	9.079	79	1.19771	0.26028	0.498189	0.990959	4	21.4176	20.8562	20.7288	21.0244
O43734	CIKS_HUMAN	TRAF3IP2	E3 ubiquitin ligase TRAF3IP2 OS=Homo sapiens OX=9606 GN=TRAF3IP2 PE=1 SV=3	64.666	574	1.19709	0.259532	0.506001	0.990959	4	17.0749	16.7806	16.9558	16.3807
Q9GZU8	PIP30_HUMAN	PSME3IP1	PSME3-interacting protein OS=Homo sapiens OX=9606 GN=PSME3IP1 PE=1 SV=1	28.912	254	1.19705	0.25948	0.238704	0.990959	4	21.0385	20.9534	20.5861	20.8868
O43306	ADCY6_HUMAN	ADCY6	Adenylate cyclase type 6 OS=Homo sapiens OX=9606 GN=ADCY6 PE=1 SV=2	130.615	1168	1.1966	0.258946	0.561508	0.990959	4	17.0998	16.3596	16.5328	16.4087
P14174	MIF_HUMAN	MIF	Macrophage migration inhibitory factor OS=Homo sapiens OX=9606 GN=MIF PE=1 SV=4	12.476	115	1.19631	0.258597	0.419889	0.990959	4	27.716	27.7457	27.2159	27.7286
Q8IVT5	KSR1_HUMAN	KSR1	Kinase suppressor of Ras 1 OS=Homo sapiens OX=9606 GN=KSR1 PE=1 SV=3	102.16	923	1.19619	0.258451	0.415296	0.990959	4	15.8962	16.0101	15.9418	15.4476
O60547	GMDS_HUMAN	GMDS	GDP-mannose 4,6 dehydratase OS=Homo sapiens OX=9606 GN=GMDS PE=1 SV=1	41.95	372	1.196	0.258222	0.457136	0.990959	4	19.9166	19.8257	19.3341	19.8917
Q96QG7	MTMR9_HUMAN	MTMR9	Myotubularin-related protein 9 OS=Homo sapiens OX=9606 GN=MTMR9 PE=1 SV=1	63.462	549	1.19565	0.2578	0.290403	0.990959	4	18.2089	18.2064	18.1308	17.7688
O14775	GNB5_HUMAN	GNB5	Guanine nucleotide-binding protein subunit beta-5 OS=Homo sapiens OX=9606 GN=GNB5 PE=1 SV=2	43.566	395	1.19562	0.257759	0.285439	0.990959	4	17.02	16.9041	16.8731	16.5355
O75971	SNPC5_HUMAN	SNAPC5	snRNA-activating protein complex subunit 5 OS=Homo sapiens OX=9606 GN=SNAPC5 PE=1 SV=1	11.328	98	1.19557	0.257703	0.751371	0.990959	4	17.1502	17.0917	16.154	17.5726
Q6XYQ8	SYT10_HUMAN	SYT10	Synaptotagmin-10 OS=Homo sapiens OX=9606 GN=SYT10 PE=2 SV=1	59.127	523	1.19509	0.257123	0.343013	0.990959	4	18.0891	18.0583	17.6085	18.0247
P62899	RL31_HUMAN	RPL31	60S ribosomal protein L31 OS=Homo sapiens OX=9606 GN=RPL31 PE=1 SV=1	14.463	125	1.19505	0.257072	0.495321	0.990959	4	24.3703	24.302	23.77	24.3882
Q9UN79	SOX13_HUMAN	SOX13	Transcription factor SOX-13 OS=Homo sapiens OX=9606 GN=SOX13 PE=1 SV=3	69.228	622	1.19438	0.256259	0.63382	0.990959	4	18.4917	18.5978	17.831	18.7459
P19634	SL9A1_HUMAN	SLC9A1	Sodium/hydrogen exchanger 1 OS=Homo sapiens OX=9606 GN=SLC9A1 PE=1 SV=2	90.763	815	1.19417	0.256012	0.720492	0.990959	4	15.5322	16.528	15.4015	16.1467
P55211	CASP9_HUMAN	CASP9	Caspase-9 OS=Homo sapiens OX=9606 GN=CASP9 PE=1 SV=3	46.281	416	1.19403	0.255845	0.646091	0.990959	4	19.0322	19.0168	18.2906	19.2467
Q96I34	PP16A_HUMAN	PPP1R16A	Protein phosphatase 1 regulatory subunit 16A OS=Homo sapiens OX=9606 GN=PPP1R16A PE=1 SV=1	57.811	528	1.19367	0.2554	0.607699	0.990959	4	16.7336	15.9029	15.9806	16.1451
O95562	SFT2B_HUMAN	SFT2D2	Vesicle transport protein SFT2B OS=Homo sapiens OX=9606 GN=SFT2D2 PE=1 SV=1	17.779	160	1.19353	0.255237	0.499709	0.990959	4	19.8584	20.4817	19.8936	19.9361
Q9NQZ5	STAR7_HUMAN	STARD7	StAR-related lipid transfer protein 7, mitochondrial OS=Homo sapiens OX=9606 GN=STARD7 PE=1 SV=2	43.113	370	1.19346	0.255148	0.457998	0.990959	4	21.1207	21.2763	21.2121	20.6747
P0CG12	DERPC_HUMAN	DERPC	Decreased expression in renal and prostate cancer protein OS=Homo sapiens OX=9606 GN=DERPC PE=1 SV=1	51.391	524	1.19342	0.255104	0.218783	0.990959	4	18.3177	18.3938	17.9616	18.2397
Q9BSF4	TIM29_HUMAN	TIMM29	Mitochondrial import inner membrane translocase subunit Tim29 OS=Homo sapiens OX=9606 GN=TIMM29 PE=1 SV=2	29.233	260	1.19338	0.255059	0.0881476	0.990959	4	23.713	23.6457	23.4982	23.3504
Q96CD2	COAC_HUMAN	PPCDC	Phosphopantothenoylcysteine decarboxylase OS=Homo sapiens OX=9606 GN=PPCDC PE=1 SV=2	22.395	204	1.19181	0.253155	0.14852	0.990959	4	18.6706	18.4512	18.3189	18.2966
Q9H5H4	ZN768_HUMAN	ZNF768	Zinc finger protein 768 OS=Homo sapiens OX=9606 GN=ZNF768 PE=1 SV=2	60.229	540	1.19099	0.252159	0.512209	0.990959	4	18.1633	17.5409	17.5293	17.6706
Q8N0W3	FCSK_HUMAN	FCSK	L-fucose kinase OS=Homo sapiens OX=9606 GN=FCSK PE=1 SV=2	117.623	1084	1.19061	0.251695	0.442533	0.990959	4	16.5441	16.826	16.6578	16.2089
P17535	JUND_HUMAN	JUND	Transcription factor jun-D OS=Homo sapiens OX=9606 GN=JUND PE=1 SV=3	35.174	347	1.19041	0.251459	0.209545	0.990959	4	18.7067	18.6762	18.3031	18.5769
Q9UBU6	FA8A1_HUMAN	FAM8A1	Protein FAM8A1 OS=Homo sapiens OX=9606 GN=FAM8A1 PE=1 SV=1	44.123	413	1.19028	0.251306	0.610894	0.990959	4	16.1371	15.9008	15.3639	16.1714
Q8TAF7	ZN461_HUMAN	ZNF461	Zinc finger protein 461 OS=Homo sapiens OX=9606 GN=ZNF461 PE=1 SV=2	66.214	563	1.18911	0.249878	0.314451	0.990959	4	17.7611	17.9185	17.7603	17.4196
Q96C01	F136A_HUMAN	FAM136A	Protein FAM136A OS=Homo sapiens OX=9606 GN=FAM136A PE=1 SV=1	15.641	138	1.18876	0.249455	0.403062	0.990959	4	20.636	20.9527	20.3684	20.7213
O00338	ST1C2_HUMAN	SULT1C2	Sulfotransferase 1C2 OS=Homo sapiens OX=9606 GN=SULT1C2 PE=1 SV=1	34.88	296	1.18863	0.249298	0.237626	0.990959	4	18.8169	19.0525	18.7777	18.5932
Q13501	SQSTM_HUMAN	SQSTM1	Sequestosome-1 OS=Homo sapiens OX=9606 GN=SQSTM1 PE=1 SV=1	47.687	440	1.18849	0.249134	0.242339	0.990959	4	23.3117	23.0085	22.9182	22.9038
Q5ZPR3	CD276_HUMAN	CD276	CD276 antigen OS=Homo sapiens OX=9606 GN=CD276 PE=1 SV=1	57.235	534	1.18805	0.24859	0.449925	0.990959	4	19.1298	19.1022	18.6009	19.1339
Q92539	LPIN2_HUMAN	LPIN2	Phosphatidate phosphatase LPIN2 OS=Homo sapiens OX=9606 GN=LPIN2 PE=1 SV=1	99.399	896	1.18802	0.248563	0.344096	0.990959	4	18.6953	18.835	18.3267	18.7064
Q9Y3E0	GOT1B_HUMAN	GOLT1B	Vesicle transport protein GOT1B OS=Homo sapiens OX=9606 GN=GOLT1B PE=1 SV=1	15.426	138	1.18789	0.248402	0.406285	0.990959	4	20.6372	20.9602	20.3754	20.7252
Q9BUV8	RCAF1_HUMAN	RAB5IF	Respirasome Complex Assembly Factor 1 OS=Homo sapiens OX=9606 GN=RAB5IF PE=1 SV=1	15.487	137	1.18785	0.248352	0.503892	0.990959	4	21.7537	21.9087	21.2855	21.8803
P54098	DPOG1_HUMAN	POLG	DNA polymerase subunit gamma-1 OS=Homo sapiens OX=9606 GN=POLG PE=1 SV=1	139.562	1239	1.18775	0.248235	0.543257	0.990959	4	17.8355	17.4134	17.6452	17.1073
P23434	GCSH_HUMAN	GCSH	Glycine cleavage system H protein, mitochondrial OS=Homo sapiens OX=9606 GN=GCSH PE=1 SV=2	18.885	173	1.18775	0.248232	0.279035	0.990959	4	22.2487	22.0709	21.7682	22.055
Q96GY3	LIN37_HUMAN	LIN37	Protein lin-37 homolog OS=Homo sapiens OX=9606 GN=LIN37 PE=1 SV=1	28.383	246	1.1877	0.248174	0.163102	0.990959	4	16.7907	16.7824	16.4237	16.6531
Q9NYL2	M3K20_HUMAN	MAP3K20	Mitogen-activated protein kinase kinase kinase 20 OS=Homo sapiens OX=9606 GN=MAP3K20 PE=1 SV=3	91.155	800	1.18763	0.248086	0.138153	0.990959	4	19.0434	18.8499	18.7345	18.6626
O94964	SOGA1_HUMAN	SOGA1	Protein SOGA1 OS=Homo sapiens OX=9606 GN=SOGA1 PE=1 SV=2	159.76	1423	1.1876	0.248052	0.1698	0.990959	4	18.219	18.1806	18.0679	17.8355
Q96B01	R51A1_HUMAN	RAD51AP1	RAD51-associated protein 1 OS=Homo sapiens OX=9606 GN=RAD51AP1 PE=1 SV=1	38.457	352	1.187	0.247315	0.138115	0.990959	4	17.508	17.5271	17.1678	17.3727
Q96MC6	MF14A_HUMAN	MFSD14A	Hippocampus abundant transcript 1 protein OS=Homo sapiens OX=9606 GN=MFSD14A PE=1 SV=2	53.027	490	1.18636	0.246542	0.765537	0.992261	4	16.5081	15.7824	15.2736	16.5238
O15120	PLCB_HUMAN	AGPAT2	1-acyl-sn-glycerol-3-phosphate acyltransferase beta OS=Homo sapiens OX=9606 GN=AGPAT2 PE=1 SV=1	30.914	278	1.18618	0.246322	0.534275	0.990959	4	18.4344	18.7999	18.0949	18.6467
P48730	KC1D_HUMAN	CSNK1D	Casein kinase I isoform delta OS=Homo sapiens OX=9606 GN=CSNK1D PE=1 SV=2	47.33	415	1.18588	0.245955	0.411828	0.990959	4	18.3431	17.9097	17.9815	17.7793
O96007	MOC2B_HUMAN	MOCS2	Molybdopterin synthase catalytic subunit OS=Homo sapiens OX=9606 GN=MOCS2 PE=1 SV=1	20.944	188	1.18584	0.245904	0.0268306	0.990959	4	18.4908	18.4484	18.1884	18.2589
O14521	DHSD_HUMAN	SDHD	Succinate dehydrogenase [ubiquinone] cytochrome b small subunit, mitochondrial OS=Homo sapiens OX=9606 GN=SDHD PE=1 SV=1	17.043	159	1.18547	0.245458	0.403209	0.990959	4	20.0917	20.2643	19.7157	20.1493
Q8WUK0	PTPM1_HUMAN	PTPMT1	Phosphatidylglycerophosphatase and protein-tyrosine phosphatase 1 OS=Homo sapiens OX=9606 GN=PTPMT1 PE=1 SV=1	22.844	201	1.18542	0.245395	0.364875	0.990959	4	19.7109	19.687	19.2429	19.6642
P49281	NRAM2_HUMAN	SLC11A2	Natural resistance-associated macrophage protein 2 OS=Homo sapiens OX=9606 GN=SLC11A2 PE=1 SV=2	62.266	568	1.18519	0.245115	0.453769	0.990959	4	18.3712	18.4338	17.8935	18.4213
P07741	APT_HUMAN	APRT	Adenine phosphoribosyltransferase OS=Homo sapiens OX=9606 GN=APRT PE=1 SV=2	19.608	180	1.185	0.244889	0.469076	0.990959	4	22.8726	22.9398	22.387	22.9356
Q9NP61	ARFG3_HUMAN	ARFGAP3	ADP-ribosylation factor GTPase-activating protein 3 OS=Homo sapiens OX=9606 GN=ARFGAP3 PE=1 SV=1	56.928	516	1.18479	0.244632	0.0365132	0.990959	4	18.7985	18.8941	18.6069	18.5964
Q9BQT8	ODC_HUMAN	SLC25A21	Mitochondrial 2-oxodicarboxylate carrier OS=Homo sapiens OX=9606 GN=SLC25A21 PE=1 SV=1	33.303	299	1.18455	0.244342	0.32322	0.990959	4	17.6494	17.9355	17.4262	17.67
P49447	CY561_HUMAN	CYB561	Cytochrome b561 OS=Homo sapiens OX=9606 GN=CYB561 PE=1 SV=2	27.559	251	1.18444	0.24421	0.852107	0.996939	4	19.051	16.7997	17.4232	17.939
Q6EEV4	GL1AD_HUMAN	POLR2M	DNA-directed RNA polymerase II subunit GRINL1A, isoforms 4/5 OS=Homo sapiens OX=9606 GN=POLR2M PE=1 SV=1	15.131	148	1.18363	0.24322	0.0408225	0.990959	4	20.3382	20.2954	20.0276	20.1195
Q92889	XPF_HUMAN	ERCC4	DNA repair endonuclease XPF OS=Homo sapiens OX=9606 GN=ERCC4 PE=1 SV=3	104.486	916	1.18314	0.242619	0.202929	0.990959	4	18.8691	19.052	18.6256	18.8103
P78382	S35A1_HUMAN	SLC35A1	CMP-sialic acid transporter OS=Homo sapiens OX=9606 GN=SLC35A1 PE=1 SV=1	36.779	337	1.18299	0.242437	0.169012	0.990959	4	18.4571	18.424	18.0845	18.3117
Q8N5I2	ARRD1_HUMAN	ARRDC1	Arrestin domain-containing protein 1 OS=Homo sapiens OX=9606 GN=ARRDC1 PE=1 SV=1	45.981	433	1.18274	0.242136	0.398451	0.990959	4	20.0504	20.3235	19.763	20.1266
P0C0S5	H2AZ_HUMAN	H2AZ1	Histone H2A.Z OS=Homo sapiens OX=9606 GN=H2AZ1 PE=1 SV=2	13.553	128	1.18264	0.242006	0.355612	0.990959	4	24.7872	24.5609	24.2634	24.6007
P42892	ECE1_HUMAN	ECE1	Endothelin-converting enzyme 1 OS=Homo sapiens OX=9606 GN=ECE1 PE=1 SV=2	87.164	770	1.18263	0.242001	0.170154	0.990959	4	19.6477	19.515	19.2453	19.4334
Q9UQR0	SCML2_HUMAN	SCML2	Sex comb on midleg-like protein 2 OS=Homo sapiens OX=9606 GN=SCML2 PE=1 SV=1	77.257	700	1.18254	0.241895	0.266221	0.990959	4	19.2089	19.0299	18.7468	19.0082
P35240	MERL_HUMAN	NF2	Merlin OS=Homo sapiens OX=9606 GN=NF2 PE=1 SV=1	69.69	595	1.18239	0.241702	0.0864165	0.990959	4	18.5703	18.4364	18.2978	18.2255
Q9Y5Z7	HCFC2_HUMAN	HCFC2	Host cell factor 2 OS=Homo sapiens OX=9606 GN=HCFC2 PE=1 SV=1	86.779	792	1.18234	0.241641	0.642127	0.990959	4	16.929	16.2116	16.0639	16.5934
Q14191	WRN_HUMAN	WRN	Werner syndrome ATP-dependent helicase OS=Homo sapiens OX=9606 GN=WRN PE=1 SV=2	162.461	1432	1.18186	0.241065	0.529274	0.990959	4	16.4783	16.3943	16.512	15.8785
Q9NRH1	YAE1_HUMAN	YAE1	Protein YAE1 homolog OS=Homo sapiens OX=9606 GN=YAE1 PE=1 SV=1	25.299	226	1.18177	0.240946	0.379291	0.990959	4	17.472	17.0931	16.9396	17.1437
Q7Z4G1	COMD6_HUMAN	COMMD6	COMM domain-containing protein 6 OS=Homo sapiens OX=9606 GN=COMMD6 PE=1 SV=1	9.638	85	1.18157	0.240705	0.47353	0.990959	4	18.0284	17.8638	17.4431	17.9676
Q5MNZ6	WIPI3_HUMAN	WDR45B	WD repeat domain phosphoinositide-interacting protein 3 OS=Homo sapiens OX=9606 GN=WDR45B PE=1 SV=2	38.122	344	1.18116	0.240203	0.235803	0.990959	4	18.3766	18.6407	18.3243	18.2126
Q6UUV7	CRTC3_HUMAN	CRTC3	CREB-regulated transcription coactivator 3 OS=Homo sapiens OX=9606 GN=CRTC3 PE=1 SV=2	66.959	619	1.18011	0.238917	0.175372	0.990959	4	18.2845	18.391	17.9959	18.2018
Q8N2K1	UB2J2_HUMAN	UBE2J2	Ubiquitin-conjugating enzyme E2 J2 OS=Homo sapiens OX=9606 GN=UBE2J2 PE=1 SV=3	28.898	259	1.18003	0.238819	0.638061	0.990959	4	18.1518	18.6597	17.8138	18.52
Q9H9J2	RM44_HUMAN	MRPL44	39S ribosomal protein L44, mitochondrial OS=Homo sapiens OX=9606 GN=MRPL44 PE=1 SV=1	37.535	332	1.17991	0.238678	0.416165	0.990959	4	20.8536	20.8198	20.3639	20.8321
Q9Y3B2	EXOS1_HUMAN	EXOSC1	Exosome complex component CSL4 OS=Homo sapiens OX=9606 GN=EXOSC1 PE=1 SV=1	21.452	195	1.17984	0.238589	0.138927	0.990959	4	20.7341	20.7951	20.4312	20.6209
Q96HA1	P121A_HUMAN	POM121	Nuclear envelope pore membrane protein POM 121 OS=Homo sapiens OX=9606 GN=POM121 PE=1 SV=2	127.72	1249	1.17915	0.237741	0.834713	0.993277	4	15.6557	14.0313	15.1945	14.0171
Q9UPY5	XCT_HUMAN	SLC7A11	Cystine/glutamate transporter OS=Homo sapiens OX=9606 GN=SLC7A11 PE=1 SV=1	55.423	501	1.17906	0.237639	0.133615	0.990959	4	19.8498	19.7682	19.4836	19.6592
Q13608	PEX6_HUMAN	PEX6	Peroxisome assembly factor 2 OS=Homo sapiens OX=9606 GN=PEX6 PE=1 SV=2	104.061	980	1.17856	0.237029	0.574367	0.990959	4	17.8986	17.6298	17.8572	17.1972
Q9H098	F107B_HUMAN	FAM107B	Protein FAM107B OS=Homo sapiens OX=9606 GN=FAM107B PE=1 SV=1	15.558	131	1.17843	0.236865	0.015417	0.990959	4	18.5229	18.5756	18.3263	18.2986
Q9Y2X0	MED16_HUMAN	MED16	Mediator of RNA polymerase II transcription subunit 16 OS=Homo sapiens OX=9606 GN=MED16 PE=1 SV=2	96.793	877	1.17755	0.235788	0.317837	0.990959	4	18.5917	18.7566	18.2798	18.5969
P63272	SPT4H_HUMAN	SUPT4H1	Transcription elongation factor SPT4 OS=Homo sapiens OX=9606 GN=SUPT4H1 PE=1 SV=1	13.193	117	1.17748	0.2357	0.492202	0.990959	4	18.9802	19.4726	19.1297	18.8517
P62633	CNBP_HUMAN	CNBP	Cellular nucleic acid-binding protein OS=Homo sapiens OX=9606 GN=CNBP PE=1 SV=1	19.463	177	1.17715	0.235302	0.547492	0.990959	4	23.5703	23.5631	23.0036	23.6593
Q9BWJ5	SF3B5_HUMAN	SF3B5	Splicing factor 3B subunit 5 OS=Homo sapiens OX=9606 GN=SF3B5 PE=1 SV=1	10.135	86	1.17693	0.235034	0.716479	0.990959	4	20.359	20.8182	19.8404	20.8667
O43920	NDUS5_HUMAN	NDUFS5	NADH dehydrogenase [ubiquinone] iron-sulfur protein 5 OS=Homo sapiens OX=9606 GN=NDUFS5 PE=1 SV=3	12.518	106	1.17687	0.23495	0.25578	0.990959	4	20.9164	20.6747	20.4733	20.648
Q68CR1	SE1L3_HUMAN	SEL1L3	Protein sel-1 homolog 3 OS=Homo sapiens OX=9606 GN=SEL1L3 PE=1 SV=2	128.567	1132	1.1768	0.234867	0.563685	0.990959	4	16.2633	16.3838	16.4258	15.7515
Q8IU60	DCP2_HUMAN	DCP2	m7GpppN-mRNA hydrolase OS=Homo sapiens OX=9606 GN=DCP2 PE=1 SV=3	48.423	420	1.17675	0.234803	0.276835	0.990959	4	16.714	16.5843	16.559	16.2696
P27635	RL10_HUMAN	RPL10	60S ribosomal protein L10 OS=Homo sapiens OX=9606 GN=RPL10 PE=1 SV=4	24.604	214	1.17634	0.234301	0.23323	0.990959	4	24.6705	24.9155	24.4937	24.6238
P49773	HINT1_HUMAN	HINT1	Histidine triad nucleotide-binding protein 1 OS=Homo sapiens OX=9606 GN=HINT1 PE=1 SV=2	13.802	126	1.17621	0.234151	0.312435	0.990959	4	24.426	24.2337	23.9496	24.2418
O15169	AXIN1_HUMAN	AXIN1	Axin-1 OS=Homo sapiens OX=9606 GN=AXIN1 PE=1 SV=2	95.635	862	1.17577	0.233601	0.554139	0.990959	4	16.8719	16.733	16.8931	16.2446
P14635	CCNB1_HUMAN	CCNB1	G2/mitotic-specific cyclin-B1 OS=Homo sapiens OX=9606 GN=CCNB1 PE=1 SV=1	48.337	433	1.17575	0.23358	0.0731258	0.990959	4	20.4148	20.4225	20.1183	20.2519
Q96HP0	DOCK6_HUMAN	DOCK6	Dedicator of cytokinesis protein 6 OS=Homo sapiens OX=9606 GN=DOCK6 PE=1 SV=3	229.558	2047	1.17532	0.233056	0.386611	0.990959	4	15.9823	16.3955	15.9075	16.0041
Q9C035	TRIM5_HUMAN	TRIM5	Tripartite motif-containing protein 5 OS=Homo sapiens OX=9606 GN=TRIM5 PE=1 SV=1	56.338	493	1.17512	0.232808	0.237561	0.990959	4	17.7065	17.7364	17.6276	17.3498
Q9H000	MKRN2_HUMAN	MKRN2	Probable E3 ubiquitin-protein ligase makorin-2 OS=Homo sapiens OX=9606 GN=MKRN2 PE=1 SV=2	46.94	416	1.17477	0.232382	0.336748	0.990959	4	19.3362	19.667	19.353	19.1854
Q8N6G5	CGAT2_HUMAN	CSGALNACT2	Chondroitin sulfate N-acetylgalactosaminyltransferase 2 OS=Homo sapiens OX=9606 GN=CSGALNACT2 PE=1 SV=1	62.572	542	1.1745	0.232049	0.30501	0.990959	4	16.9779	17.2952	16.8442	16.9649
Q53HC9	EIPR1_HUMAN	EIPR1	EARP and GARP complex-interacting protein 1 OS=Homo sapiens OX=9606 GN=EIPR1 PE=1 SV=2	43.603	387	1.17439	0.231906	0.482895	0.990959	4	20.0383	19.826	19.4504	19.95
Q8TBZ3	WDR20_HUMAN	WDR20	WD repeat-containing protein 20 OS=Homo sapiens OX=9606 GN=WDR20 PE=1 SV=2	62.893	569	1.17411	0.231574	0.40128	0.990959	4	17.3331	17.2218	17.2577	16.834
Q9P0U4	CXXC1_HUMAN	CXXC1	CXXC-type zinc finger protein 1 OS=Homo sapiens OX=9606 GN=CXXC1 PE=1 SV=2	75.712	656	1.17373	0.231101	0.174912	0.990959	4	18.8872	19.1081	18.7487	18.7843
Q96A54	PAQR1_HUMAN	ADIPOR1	Adiponectin receptor protein 1 OS=Homo sapiens OX=9606 GN=ADIPOR1 PE=1 SV=1	42.616	375	1.1735	0.230819	0.383233	0.990959	4	15.8606	16.2587	15.7674	15.8902
O95382	M3K6_HUMAN	MAP3K6	Mitogen-activated protein kinase kinase kinase 6 OS=Homo sapiens OX=9606 GN=MAP3K6 PE=1 SV=3	142.596	1288	1.17345	0.230757	0.575573	0.990959	4	17.6146	17.2322	17.4835	16.9017
Q5T7P8	SYT6_HUMAN	SYT6	Synaptotagmin-6 OS=Homo sapiens OX=9606 GN=SYT6 PE=1 SV=3	57.325	510	1.17306	0.230278	0.443364	0.990959	4	18.5822	18.1458	18.0267	18.2407
P42336	PK3CA_HUMAN	PIK3CA	Phosphatidylinositol 4,5-bisphosphate 3-kinase catalytic subunit alpha isoform OS=Homo sapiens OX=9606 GN=PIK3CA PE=1 SV=2	124.284	1068	1.17304	0.230257	0.170975	0.990959	4	16.8291	16.9831	16.5975	16.7542
P20618	PSB1_HUMAN	PSMB1	Proteasome subunit beta type-1 OS=Homo sapiens OX=9606 GN=PSMB1 PE=1 SV=2	26.489	241	1.17284	0.230008	0.452878	0.990959	4	22.091	22.1391	21.6374	22.1327
Q8NI77	KI18A_HUMAN	KIF18A	Kinesin-like protein KIF18A OS=Homo sapiens OX=9606 GN=KIF18A PE=1 SV=2	102.281	898	1.17276	0.229902	0.0787973	0.990959	4	18.5724	18.5399	18.393	18.2595
Q8NB49	AT11C_HUMAN	ATP11C	Phospholipid-transporting ATPase IG OS=Homo sapiens OX=9606 GN=ATP11C PE=1 SV=3	129.477	1132	1.17259	0.229704	0.555669	0.990959	4	16.1292	16.4605	16.3477	15.7827
Q7L099	RUFY3_HUMAN	RUFY3	Protein RUFY3 OS=Homo sapiens OX=9606 GN=RUFY3 PE=1 SV=1	52.965	469	1.17259	0.229697	0.29579	0.990959	4	17.1559	16.8349	16.7981	16.7333
P55209	NP1L1_HUMAN	NAP1L1	Nucleosome assembly protein 1-like 1 OS=Homo sapiens OX=9606 GN=NAP1L1 PE=1 SV=1	45.374	391	1.17229	0.229327	0.340899	0.990959	4	22.5188	22.4109	22.0586	22.4125
P38435	VKGC_HUMAN	GGCX	Vitamin K-dependent gamma-carboxylase OS=Homo sapiens OX=9606 GN=GGCX PE=1 SV=2	87.561	758	1.17216	0.229175	0.25432	0.990959	4	19.0604	19.2664	19.036	18.8325
O43463	SUV91_HUMAN	SUV39H1	Histone-lysine N-methyltransferase SUV39H1 OS=Homo sapiens OX=9606 GN=SUV39H1 PE=1 SV=1	47.908	412	1.17209	0.229086	0.150799	0.990959	4	17.4619	17.3071	17.0909	17.2198
Q96S15	WDR24_HUMAN	WDR24	GATOR complex protein WDR24 OS=Homo sapiens OX=9606 GN=WDR24 PE=1 SV=2	88.207	790	1.17209	0.229085	0.108945	0.990959	4	18.2683	18.1201	17.9289	18.0013
Q8TEK3	DOT1L_HUMAN	DOT1L	Histone-lysine N-methyltransferase, H3 lysine-79 specific OS=Homo sapiens OX=9606 GN=DOT1L PE=1 SV=3	164.856	1537	1.17184	0.228771	0.245928	0.990959	4	16.074	16.2453	16.0427	15.819
P55789	ALR_HUMAN	GFER	FAD-linked sulfhydryl oxidase ALR OS=Homo sapiens OX=9606 GN=GFER PE=1 SV=2	23.449	205	1.17135	0.228175	0.703303	0.990959	4	17.6922	17.6024	16.9018	17.9365
Q68DQ2	CRBG3_HUMAN	CRYBG3	Very large A-kinase anchor protein OS=Homo sapiens OX=9606 GN=CRYBG3 PE=1 SV=3	330.633	2970	1.17133	0.228149	0.269947	0.990959	4	19.2944	18.9975	18.9455	18.8901
Q9UHN1	DPOG2_HUMAN	POLG2	DNA polymerase subunit gamma-2, mitochondrial OS=Homo sapiens OX=9606 GN=POLG2 PE=1 SV=1	54.911	485	1.17131	0.228126	0.324559	0.990959	4	18.6537	18.5718	18.5559	18.2133
Q8N8R5	CB069_HUMAN	C2orf69	UPF0565 protein C2orf69 OS=Homo sapiens OX=9606 GN=C2orf69 PE=1 SV=1	43.448	385	1.1709	0.227618	0.423456	0.990959	4	17.3162	16.8604	16.8705	16.8508
O75317	UBP12_HUMAN	USP12	Ubiquitin carboxyl-terminal hydrolase 12 OS=Homo sapiens OX=9606 GN=USP12 PE=1 SV=2	42.858	370	1.17062	0.227275	0.480848	0.990959	4	17.8751	17.3531	17.4301	17.3436
Q8TCF1	ZFAN1_HUMAN	ZFAND1	AN1-type zinc finger protein 1 OS=Homo sapiens OX=9606 GN=ZFAND1 PE=1 SV=1	30.787	268	1.17039	0.226988	0.0272476	0.990959	4	17.7522	17.6955	17.4711	17.5225
Q92546	RGP1_HUMAN	RGP1	RAB6A-GEF complex partner protein 2 OS=Homo sapiens OX=9606 GN=RGP1 PE=1 SV=1	42.455	391	1.17019	0.226739	0.369892	0.990959	4	16.8178	16.7456	16.3607	16.7493
P18850	ATF6A_HUMAN	ATF6	Cyclic AMP-dependent transcription factor ATF-6 alpha OS=Homo sapiens OX=9606 GN=ATF6 PE=1 SV=3	74.585	670	1.17014	0.226675	0.153361	0.990959	4	17.7632	17.9435	17.6717	17.5816
O60779	S19A2_HUMAN	SLC19A2	Thiamine transporter 1 OS=Homo sapiens OX=9606 GN=SLC19A2 PE=1 SV=2	55.4	497	1.17002	0.226537	0.245631	0.990959	4	18.6244	18.3492	18.2378	18.2827
Q15427	SF3B4_HUMAN	SF3B4	Splicing factor 3B subunit 4 OS=Homo sapiens OX=9606 GN=SF3B4 PE=1 SV=1	44.386	424	1.16989	0.226374	0.524685	0.990959	4	22.9583	22.9378	22.4256	23.0178
Q96PQ0	SORC2_HUMAN	SORCS2	VPS10 domain-containing receptor SorCS2 OS=Homo sapiens OX=9606 GN=SORCS2 PE=1 SV=3	128.152	1159	1.16968	0.22611	0.346238	0.990959	4	15.8598	16.0895	15.8937	15.6034
Q9BYW2	SETD2_HUMAN	SETD2	Histone-lysine N-methyltransferase SETD2 OS=Homo sapiens OX=9606 GN=SETD2 PE=1 SV=3	287.597	2564	1.16949	0.225877	0.0914264	0.990959	4	18.7084	18.8018	18.5859	18.4725
Q8N392	RHG18_HUMAN	ARHGAP18	Rho GTPase-activating protein 18 OS=Homo sapiens OX=9606 GN=ARHGAP18 PE=1 SV=3	74.977	663	1.16947	0.225861	0.116541	0.990959	4	17.2835	17.4528	17.1403	17.1443
Q9NRC1	ST7_HUMAN	ST7	Suppressor of tumorigenicity 7 protein OS=Homo sapiens OX=9606 GN=ST7 PE=1 SV=1	67.166	585	1.1689	0.225157	0.530561	0.990959	4	17.9975	18.0635	17.5077	18.103
Q13825	AUHM_HUMAN	AUH	Methylglutaconyl-CoA hydratase, mitochondrial OS=Homo sapiens OX=9606 GN=AUH PE=1 SV=1	35.609	339	1.16864	0.224828	0.114288	0.990959	4	18.9482	19.0935	18.7552	18.8368
Q12959	DLG1_HUMAN	DLG1	Disks large homolog 1 OS=Homo sapiens OX=9606 GN=DLG1 PE=1 SV=2	100.455	904	1.16853	0.2247	0.190063	0.990959	4	19.2178	19.0819	19.018	18.8323
Q15040	JOS1_HUMAN	JOSD1	Josephin-1 OS=Homo sapiens OX=9606 GN=JOSD1 PE=1 SV=1	23.198	202	1.16788	0.223889	0.34576	0.990959	4	17.6256	17.4467	17.1526	17.4719
P31260	HXA10_HUMAN	HOXA10	Homeobox protein Hox-A10 OS=Homo sapiens OX=9606 GN=HOXA10 PE=1 SV=3	42.414	410	1.16768	0.223639	0.428264	0.990959	4	15.7073	15.9289	15.7925	15.3964
Q9H9J4	UBP42_HUMAN	USP42	Ubiquitin carboxyl-terminal hydrolase 42 OS=Homo sapiens OX=9606 GN=USP42 PE=1 SV=3	145.392	1324	1.16765	0.223611	0.525483	0.990959	4	17.1775	16.8052	16.9944	16.541
P78317	RNF4_HUMAN	RNF4	E3 ubiquitin-protein ligase RNF4 OS=Homo sapiens OX=9606 GN=RNF4 PE=1 SV=1	21.319	190	1.16741	0.223312	0.805742	0.993107	4	16.3242	15.9761	15.1487	16.705
P24001	IL32_HUMAN	IL32	Interleukin-32 OS=Homo sapiens OX=9606 GN=IL32 PE=1 SV=3	26.676	234	1.16681	0.222571	0.397432	0.990959	4	16.7008	16.9646	16.7715	16.4488
P14678	RSMB_HUMAN	SNRPB	Small nuclear ribonucleoprotein-associated proteins B and B' OS=Homo sapiens OX=9606 GN=SNRPB PE=1 SV=2	24.61	240	1.16658	0.222286	0.582822	0.990959	4	23.1742	23.7511	23.0558	23.4249
Q96CN4	EVI5L_HUMAN	EVI5L	EVI5-like protein OS=Homo sapiens OX=9606 GN=EVI5L PE=1 SV=1	91.376	794	1.16646	0.222131	0.481084	0.990959	4	16.9263	16.6016	16.3404	16.7433
Q9BWW8	APOL6_HUMAN	APOL6	Apolipoprotein L6 OS=Homo sapiens OX=9606 GN=APOL6 PE=1 SV=1	38.128	343	1.16631	0.221947	0.112262	0.990959	4	16.7788	16.7655	16.4691	16.6313
Q96C92	ENTR1_HUMAN	ENTR1	Endosome-associated-trafficking regulator 1 OS=Homo sapiens OX=9606 GN=ENTR1 PE=1 SV=3	47.961	435	1.16624	0.221861	0.217736	0.990959	4	17.8953	18.0165	17.8433	17.6248
Q9UEW8	STK39_HUMAN	STK39	STE20/SPS1-related proline-alanine-rich protein kinase OS=Homo sapiens OX=9606 GN=STK39 PE=1 SV=3	59.474	545	1.16622	0.221846	0.379568	0.990959	4	18.9917	19.3774	18.9167	19.0087
O95994	AGR2_HUMAN	AGR2	Anterior gradient protein 2 homolog OS=Homo sapiens OX=9606 GN=AGR2 PE=1 SV=1	19.979	175	1.1658	0.221318	0.374895	0.990959	4	19.951	19.7687	19.4657	19.8114
Q8WXA9	SREK1_HUMAN	SREK1	Splicing regulatory glutamine/lysine-rich protein 1 OS=Homo sapiens OX=9606 GN=SREK1 PE=1 SV=1	59.38	508	1.16557	0.221036	0.324328	0.990959	4	20.3267	20.1438	19.8703	20.1582
Q96HB5	CC120_HUMAN	CCDC120	Coiled-coil domain-containing protein 120 OS=Homo sapiens OX=9606 GN=CCDC120 PE=1 SV=1	67.567	630	1.16555	0.221005	0.300707	0.990959	4	18.341	18.3072	17.9443	18.262
P03905	NU4M_HUMAN	MT-ND4	NADH-ubiquinone oxidoreductase chain 4 OS=Homo sapiens OX=9606 GN=MT-ND4 PE=1 SV=1	51.581	459	1.16532	0.22073	0.655498	0.990959	4	19.683	19.7469	19.0701	19.9184
P46778	RL21_HUMAN	RPL21	60S ribosomal protein L21 OS=Homo sapiens OX=9606 GN=RPL21 PE=1 SV=2	18.565	160	1.16518	0.220552	0.35727	0.990959	4	22.8563	23.0025	22.5379	22.8797
Q9BRV8	SIKE1_HUMAN	SIKE1	Suppressor of IKBKE 1 OS=Homo sapiens OX=9606 GN=SIKE1 PE=1 SV=1	23.721	207	1.16516	0.220529	0.792763	0.993107	4	17.1079	15.9028	15.8619	16.7076
Q13868	EXOS2_HUMAN	EXOSC2	Exosome complex component RRP4 OS=Homo sapiens OX=9606 GN=EXOSC2 PE=1 SV=2	32.789	293	1.16505	0.22039	0.151047	0.990959	4	21.9356	21.9845	21.6458	21.8335
O95822	DCMC_HUMAN	MLYCD	Malonyl-CoA decarboxylase, mitochondrial OS=Homo sapiens OX=9606 GN=MLYCD PE=1 SV=3	55.003	493	1.16499	0.220312	0.37529	0.990959	4	17.3332	17.7226	17.3045	17.3107
Q86VU5	CMTD1_HUMAN	COMTD1	Catechol O-methyltransferase domain-containing protein 1 OS=Homo sapiens OX=9606 GN=COMTD1 PE=1 SV=1	28.809	262	1.1637	0.218723	0.52098	0.990959	4	17.1527	17.4373	16.8312	17.3214
P03886	NU1M_HUMAN	MT-ND1	NADH-ubiquinone oxidoreductase chain 1 OS=Homo sapiens OX=9606 GN=MT-ND1 PE=1 SV=1	35.661	318	1.16356	0.218546	0.678062	0.990959	4	20.3908	19.8632	20.2785	19.5384
P62277	RS13_HUMAN	RPS13	40S ribosomal protein S13 OS=Homo sapiens OX=9606 GN=RPS13 PE=1 SV=2	17.222	151	1.16353	0.218506	0.378719	0.990959	4	25.4413	25.1399	24.9485	25.1957
Q58WW2	DCAF6_HUMAN	DCAF6	DDB1- and CUL4-associated factor 6 OS=Homo sapiens OX=9606 GN=DCAF6 PE=1 SV=1	96.292	860	1.16337	0.218308	0.667852	0.990959	4	16.452	15.8016	15.6146	16.2025
Q9H6Q4	CIAO3_HUMAN	CIAO3	Cytosolic iron-sulfur assembly component 3 OS=Homo sapiens OX=9606 GN=CIAO3 PE=1 SV=1	53.02	476	1.16306	0.217931	0.017789	0.990959	4	16.9908	17.0431	16.8125	16.7855
O15446	RPA34_HUMAN	POLR1G	DNA-directed RNA polymerase I subunit RPA34 OS=Homo sapiens OX=9606 GN=POLR1G PE=1 SV=1	54.986	510	1.163	0.217849	0.00245569	0.808889	4	20.4072	20.3989	20.1952	20.1752
Q9C0D2	CE295_HUMAN	CEP295	Centrosomal protein of 295 kDa OS=Homo sapiens OX=9606 GN=CEP295 PE=1 SV=4	295.176	2601	1.16293	0.21777	0.217173	0.990959	4	17.7392	17.5134	17.4559	17.3612
Q969V5	MUL1_HUMAN	MUL1	Mitochondrial ubiquitin ligase activator of NFKB 1 OS=Homo sapiens OX=9606 GN=MUL1 PE=1 SV=1	39.8	352	1.16287	0.217689	0.258231	0.990959	4	19.8081	19.8636	19.4818	19.7545
Q9BYC5	FUT8_HUMAN	FUT8	Alpha-(1,6)-fucosyltransferase OS=Homo sapiens OX=9606 GN=FUT8 PE=1 SV=2	66.516	575	1.16255	0.21729	0.455324	0.990959	4	16.7709	16.5124	16.2262	16.6225
O60503	ADCY9_HUMAN	ADCY9	Adenylate cyclase type 9 OS=Homo sapiens OX=9606 GN=ADCY9 PE=1 SV=4	150.701	1353	1.1625	0.217233	0.34359	0.990959	4	17.6154	17.2761	17.1797	17.2774
Q7Z3J2	VP35L_HUMAN	VPS35L	VPS35 endosomal protein-sorting factor-like OS=Homo sapiens OX=9606 GN=VPS35L PE=1 SV=2	109.563	963	1.16238	0.217085	0.0464355	0.990959	4	17.8301	17.7605	17.5445	17.6119
Q96GS4	BORC6_HUMAN	BORCS6	BLOC-1-related complex subunit 6 OS=Homo sapiens OX=9606 GN=BORCS6 PE=1 SV=2	37.226	357	1.16192	0.216511	0.10936	0.990959	4	20.265	20.1281	19.9424	20.0177
Q99759	M3K3_HUMAN	MAP3K3	Mitogen-activated protein kinase kinase kinase 3 OS=Homo sapiens OX=9606 GN=MAP3K3 PE=1 SV=2	70.898	626	1.16157	0.216075	0.492875	0.990959	4	19.6284	19.365	19.5044	19.0568
Q8N9Q2	SR1IP_HUMAN	SREK1IP1	Protein SREK1IP1 OS=Homo sapiens OX=9606 GN=SREK1IP1 PE=1 SV=1	18.177	155	1.16149	0.215978	0.137215	0.990959	4	18.8623	18.7097	18.6167	18.5232
P98173	FAM3A_HUMAN	FAM3A	Protein FAM3A OS=Homo sapiens OX=9606 GN=FAM3A PE=1 SV=2	25.152	230	1.16104	0.215414	0.57898	0.990959	4	18.009	17.6167	17.8605	17.3343
Q8IW45	NNRD_HUMAN	NAXD	ATP-dependent (S)-NAD(P)H-hydrate dehydratase OS=Homo sapiens OX=9606 GN=NAXD PE=1 SV=1	36.576	347	1.16088	0.215216	0.399603	0.990959	4	20.6805	20.3436	20.1841	20.4096
P17096	HMGA1_HUMAN	HMGA1	High mobility group protein HMG-I/HMG-Y OS=Homo sapiens OX=9606 GN=HMGA1 PE=1 SV=3	11.676	107	1.16078	0.2151	0.312207	0.990959	4	21.2861	20.9925	20.9891	20.8593
Q7Z412	PEX26_HUMAN	PEX26	Peroxisome assembly protein 26 OS=Homo sapiens OX=9606 GN=PEX26 PE=1 SV=2	33.898	305	1.16069	0.214985	0.098526	0.990959	4	16.1163	16.1676	15.9953	15.8586
Q8TCT8	SPP2A_HUMAN	SPPL2A	Signal peptide peptidase-like 2A OS=Homo sapiens OX=9606 GN=SPPL2A PE=1 SV=2	58.143	520	1.15999	0.214114	0.393325	0.990959	4	19.1154	19.4207	18.9273	19.1806
Q9Y584	TIM22_HUMAN	TIMM22	Mitochondrial import inner membrane translocase subunit Tim22 OS=Homo sapiens OX=9606 GN=TIMM22 PE=1 SV=2	20.031	194	1.1598	0.213876	0.419992	0.990959	4	18.8247	19.0003	18.5052	18.892
Q8WV22	NSE1_HUMAN	NSMCE1	Non-structural maintenance of chromosomes element 1 homolog OS=Homo sapiens OX=9606 GN=NSMCE1 PE=1 SV=5	30.855	266	1.15977	0.213833	0.46682	0.990959	4	19.0156	18.763	18.8795	18.4715
Q9H930	SP14L_HUMAN	SP140L	Nuclear body protein SP140-like protein OS=Homo sapiens OX=9606 GN=SP140L PE=1 SV=3	67.005	580	1.15971	0.213763	0.408364	0.990959	4	16.4841	16.4714	16.4699	16.0581
Q13615	MTMR3_HUMAN	MTMR3	Myotubularin-related protein 3 OS=Homo sapiens OX=9606 GN=MTMR3 PE=1 SV=3	133.619	1198	1.15952	0.213531	0.238789	0.990959	4	17.1958	17.2148	16.8635	17.1201
P36639	8ODP_HUMAN	NUDT1	7,8-dihydro-8-oxoguanine triphosphatase OS=Homo sapiens OX=9606 GN=NUDT1 PE=1 SV=3	22.52	197	1.1595	0.213502	0.746703	0.990959	4	20.7068	20.4264	19.7938	20.9123
Q06481	APLP2_HUMAN	APLP2	Amyloid-like protein 2 OS=Homo sapiens OX=9606 GN=APLP2 PE=1 SV=2	86.956	763	1.15927	0.213212	0.306923	0.990959	4	20.1504	20.1241	19.7678	20.0803
Q13487	SNPC2_HUMAN	SNAPC2	snRNA-activating protein complex subunit 2 OS=Homo sapiens OX=9606 GN=SNAPC2 PE=1 SV=1	35.556	334	1.15925	0.213197	0.00910002	0.990959	4	17.186	17.2014	16.9995	16.9615
Q14527	HLTF_HUMAN	HLTF	Helicase-like transcription factor OS=Homo sapiens OX=9606 GN=HLTF PE=1 SV=2	113.929	1009	1.15917	0.213089	0.341218	0.990959	4	20.9108	20.6607	20.4545	20.6908
Q9NX95	SYBU_HUMAN	SYBU	Syntabulin OS=Homo sapiens OX=9606 GN=SYBU PE=1 SV=2	72.388	663	1.159	0.212878	0.532552	0.990959	4	17.1825	16.6135	16.6955	16.6748
P18085	ARF4_HUMAN	ARF4	ADP-ribosylation factor 4 OS=Homo sapiens OX=9606 GN=ARF4 PE=1 SV=3	20.511	180	1.15897	0.212839	0.445248	0.990959	4	24.626	24.3399	24.0956	24.4447
Q8NHM5	KDM2B_HUMAN	KDM2B	Lysine-specific demethylase 2B OS=Homo sapiens OX=9606 GN=KDM2B PE=1 SV=1	152.615	1336	1.15894	0.212809	0.159977	0.990959	4	18.6903	18.6321	18.3556	18.5411
P23469	PTPRE_HUMAN	PTPRE	Receptor-type tyrosine-protein phosphatase epsilon OS=Homo sapiens OX=9606 GN=PTPRE PE=1 SV=1	80.642	700	1.15875	0.212573	0.503328	0.990959	4	15.7019	15.948	15.3803	15.8444
O15438	MRP3_HUMAN	ABCC3	ATP-binding cassette sub-family C member 3 OS=Homo sapiens OX=9606 GN=ABCC3 PE=1 SV=3	169.343	1527	1.15869	0.212495	0.0208832	0.990959	4	19.4962	19.4366	19.2447	19.2631
P36957	ODO2_HUMAN	DLST	Dihydrolipoyllysine-residue succinyltransferase component of 2-oxoglutarate dehydrogenase complex, mitochondrial OS=Homo sapiens OX=9606 GN=DLST PE=1 SV=4	48.755	453	1.15862	0.212405	0.22331	0.990959	4	23.1674	22.98	22.7834	22.9391
Q96A32	MLRS_HUMAN	MYLPF	Myosin regulatory light chain 2, skeletal muscle isoform OS=Homo sapiens OX=9606 GN=MYLPF PE=1 SV=1	19.015	169	1.15856	0.212336	0.782047	0.993107	4	16.7334	17.777	16.6189	17.4668
P10124	SRGN_HUMAN	SRGN	Serglycin OS=Homo sapiens OX=9606 GN=SRGN PE=1 SV=3	17.652	158	1.15833	0.212042	0.379649	0.990959	4	19.4424	19.4622	19.051	19.4296
P10412	H14_HUMAN	H1-4	Histone H1.4 OS=Homo sapiens OX=9606 GN=H1-4 PE=1 SV=2	21.865	219	1.15803	0.211677	0.178064	0.990959	4	28.9541	28.9929	28.6599	28.8637
O00214	LEG8_HUMAN	LGALS8	Galectin-8 OS=Homo sapiens OX=9606 GN=LGALS8 PE=1 SV=4	35.808	317	1.15783	0.211424	0.643032	0.990959	4	18.4459	17.7953	18.1265	17.6918
O60512	B4GT3_HUMAN	B4GALT3	Beta-1,4-galactosyltransferase 3 OS=Homo sapiens OX=9606 GN=B4GALT3 PE=1 SV=2	43.928	393	1.15771	0.211268	0.544093	0.990959	4	16.695	16.2903	16.4914	16.0714
Q9Y6X4	F169A_HUMAN	FAM169A	Soluble lamin-associated protein of 75 kDa OS=Homo sapiens OX=9606 GN=FAM169A PE=1 SV=2	74.955	670	1.15705	0.210453	0.152849	0.990959	4	16.731	16.7767	16.4529	16.6339
Q96S38	KS6C1_HUMAN	RPS6KC1	Ribosomal protein S6 kinase delta-1 OS=Homo sapiens OX=9606 GN=RPS6KC1 PE=1 SV=2	118.682	1066	1.15705	0.21045	0.376646	0.990959	4	18.3312	17.9816	18.0115	17.8805
O15440	MRP5_HUMAN	ABCC5	Multidrug resistance-associated protein 5 OS=Homo sapiens OX=9606 GN=ABCC5 PE=1 SV=2	160.66	1437	1.15687	0.210223	0.0477218	0.990959	4	16.496	16.5162	16.2493	16.3424
Q9NXR7	BABA2_HUMAN	BABAM2	BRISC and BRCA1-A complex member 2 OS=Homo sapiens OX=9606 GN=BABAM2 PE=1 SV=2	43.552	383	1.15683	0.210181	0.284008	0.990959	4	20.4084	20.2654	20.2527	20.0007
Q8WUH1	CHUR_HUMAN	CHURC1	Protein Churchill OS=Homo sapiens OX=9606 GN=CHURC1 PE=1 SV=2	16.111	139	1.15648	0.209746	0.222151	0.990959	4	19.1436	19.0524	18.7774	18.9991
P00403	COX2_HUMAN	MT-CO2	Cytochrome c oxidase subunit 2 OS=Homo sapiens OX=9606 GN=MT-CO2 PE=1 SV=1	25.565	227	1.15624	0.209437	0.230172	0.990959	4	23.7048	23.6483	23.3476	23.5866
O15533	TPSN_HUMAN	TAPBP	Tapasin OS=Homo sapiens OX=9606 GN=TAPBP PE=1 SV=1	47.626	448	1.15622	0.209412	0.376992	0.990959	4	21.3613	21.483	21.3884	21.037
Q7RTS9	DYM_HUMAN	DYM	Dymeclin OS=Homo sapiens OX=9606 GN=DYM PE=1 SV=1	75.935	669	1.15621	0.209408	0.618432	0.990959	4	17.0937	17.4498	16.751	17.3738
Q8TDZ2	MICA1_HUMAN	MICAL1	[F-actin]-monooxygenase MICAL1 OS=Homo sapiens OX=9606 GN=MICAL1 PE=1 SV=2	117.875	1067	1.15614	0.209319	0.175307	0.990959	4	15.8557	15.7348	15.6675	15.5044
Q4U2R6	RM51_HUMAN	MRPL51	39S ribosomal protein L51, mitochondrial OS=Homo sapiens OX=9606 GN=MRPL51 PE=1 SV=1	15.095	128	1.15604	0.209188	0.620332	0.990959	4	17.2537	16.5897	16.5722	16.8528
Q5TEU4	NDUF5_HUMAN	NDUFAF5	Arginine-hydroxylase NDUFAF5, mitochondrial OS=Homo sapiens OX=9606 GN=NDUFAF5 PE=1 SV=1	38.918	345	1.15588	0.208994	0.174287	0.990959	4	18.3205	18.5033	18.1601	18.2457
Q8TBF4	ZCRB1_HUMAN	ZCRB1	Zinc finger CCHC-type and RNA-binding motif-containing protein 1 OS=Homo sapiens OX=9606 GN=ZCRB1 PE=1 SV=2	24.592	217	1.15572	0.208794	0.37766	0.990959	4	18.5939	18.9301	18.4743	18.6321
P40306	PSB10_HUMAN	PSMB10	Proteasome subunit beta type-10 OS=Homo sapiens OX=9606 GN=PSMB10 PE=1 SV=1	28.936	273	1.15542	0.208423	0.550199	0.990959	4	17.4282	17.1572	17.3436	16.8249
P62314	SMD1_HUMAN	SNRPD1	Small nuclear ribonucleoprotein Sm D1 OS=Homo sapiens OX=9606 GN=SNRPD1 PE=1 SV=1	13.282	119	1.15525	0.208202	0.462097	0.990959	4	22.1568	22.1203	21.7003	22.1604
O14681	EI24_HUMAN	EI24	Etoposide-induced protein 2.4 homolog OS=Homo sapiens OX=9606 GN=EI24 PE=1 SV=4	38.965	340	1.15501	0.207903	0.0741464	0.990959	4	19.7818	19.9017	19.6355	19.6322
P16401	H15_HUMAN	H1-5	Histone H1.5 OS=Homo sapiens OX=9606 GN=H1-5 PE=1 SV=3	22.58	226	1.15479	0.207636	0.429192	0.990959	4	27.7	27.3686	27.1957	27.4576
O43301	HS12A_HUMAN	HSPA12A	Heat shock 70 kDa protein 12A OS=Homo sapiens OX=9606 GN=HSPA12A PE=1 SV=2	74.978	675	1.1547	0.207518	0.512337	0.990959	4	18.2165	18.0426	18.1699	17.6741
Q9BXP2	S12A9_HUMAN	SLC12A9	Solute carrier family 12 member 9 OS=Homo sapiens OX=9606 GN=SLC12A9 PE=1 SV=1	96.11	914	1.1543	0.207024	0.346269	0.990959	4	17.3228	16.9897	16.918	16.9804
Q9UJW0	DCTN4_HUMAN	DCTN4	Dynactin subunit 4 OS=Homo sapiens OX=9606 GN=DCTN4 PE=1 SV=1	52.337	460	1.15414	0.206821	0.286398	0.990959	4	19.6775	19.6621	19.3196	19.6064
P0DI83	NARR_HUMAN	RAB34	Ras-related protein Rab-34, isoform NARR OS=Homo sapiens OX=9606 GN=RAB34 PE=1 SV=1	21.118	198	1.15405	0.206701	0.392468	0.990959	4	16.9836	17.2333	16.7571	17.0464
Q49A88	CCD14_HUMAN	CCDC14	Coiled-coil domain-containing protein 14 OS=Homo sapiens OX=9606 GN=CCDC14 PE=1 SV=3	106.302	953	1.15393	0.206557	0.488704	0.990959	4	16.4127	16.7199	16.1683	16.5512
Q5HYK7	SH319_HUMAN	SH3D19	SH3 domain-containing protein 19 OS=Homo sapiens OX=9606 GN=SH3D19 PE=1 SV=2	86.525	790	1.15388	0.206491	0.103763	0.990959	4	17.0653	17.0559	16.782	16.9262
Q9H9Q4	NHEJ1_HUMAN	NHEJ1	Non-homologous end-joining factor 1 OS=Homo sapiens OX=9606 GN=NHEJ1 PE=1 SV=1	33.337	299	1.15386	0.206469	0.542975	0.990959	4	16.8318	17.0993	17.0098	16.5084
Q8WVS4	DC2I1_HUMAN	DYNC2I1	Cytoplasmic dynein 2 intermediate chain 1 OS=Homo sapiens OX=9606 GN=DYNC2I1 PE=1 SV=3	122.571	1066	1.15386	0.206465	0.337111	0.990959	4	16.2138	16.3145	15.9006	16.2147
Q9H944	MED20_HUMAN	MED20	Mediator of RNA polymerase II transcription subunit 20 OS=Homo sapiens OX=9606 GN=MED20 PE=1 SV=1	23.222	212	1.1538	0.206393	0.270093	0.990959	4	19.3307	19.5269	19.1272	19.3175
Q2PZI1	D19L1_HUMAN	DPY19L1	Probable C-mannosyltransferase DPY19L1 OS=Homo sapiens OX=9606 GN=DPY19L1 PE=2 SV=1	77.319	675	1.15363	0.206187	0.254539	0.990959	4	17.9639	17.7853	17.5734	17.7633
P20138	CD33_HUMAN	CD33	Myeloid cell surface antigen CD33 OS=Homo sapiens OX=9606 GN=CD33 PE=1 SV=2	39.825	364	1.15342	0.205918	0.372618	0.990959	4	17.4111	17.1459	16.9497	17.1953
Q9NRP4	SDHF3_HUMAN	SDHAF3	Succinate dehydrogenase assembly factor 3, mitochondrial OS=Homo sapiens OX=9606 GN=SDHAF3 PE=1 SV=1	14.652	125	1.15322	0.205666	0.721811	0.990959	4	17.344	16.4075	16.4887	16.8514
Q96SL8	FIZ1_HUMAN	FIZ1	Flt3-interacting zinc finger protein 1 OS=Homo sapiens OX=9606 GN=FIZ1 PE=1 SV=2	51.996	496	1.15271	0.205036	0.380508	0.990959	4	18.5021	18.4573	18.0923	18.457
Q9Y315	DEOC_HUMAN	DERA	Deoxyribose-phosphate aldolase OS=Homo sapiens OX=9606 GN=DERA PE=1 SV=2	35.231	318	1.15263	0.20493	0.319944	0.990959	4	19.4094	19.2121	18.9847	19.2269
Q96P47	AGAP3_HUMAN	AGAP3	Arf-GAP with GTPase, ANK repeat and PH domain-containing protein 3 OS=Homo sapiens OX=9606 GN=AGAP3 PE=1 SV=2	95.044	875	1.1521	0.204263	0.161153	0.990959	4	19.2794	19.164	19.0913	18.9435
Q9BXL6	CAR14_HUMAN	CARD14	Caspase recruitment domain-containing protein 14 OS=Homo sapiens OX=9606 GN=CARD14 PE=1 SV=2	113.27	1004	1.15197	0.204104	0.531467	0.990959	4	15.121	14.6883	14.5355	14.8657
O43909	EXTL3_HUMAN	EXTL3	Exostosin-like 3 OS=Homo sapiens OX=9606 GN=EXTL3 PE=1 SV=1	104.749	919	1.15182	0.203912	0.128616	0.990959	4	16.2641	16.3941	16.0765	16.1739
P62244	RS15A_HUMAN	RPS15A	40S ribosomal protein S15a OS=Homo sapiens OX=9606 GN=RPS15A PE=1 SV=2	14.84	130	1.15134	0.203316	0.268258	0.990959	4	24.4883	24.2388	24.1116	24.2088
Q9NXF7	DCA16_HUMAN	DCAF16	DDB1- and CUL4-associated factor 16 OS=Homo sapiens OX=9606 GN=DCAF16 PE=1 SV=1	24.193	216	1.15115	0.203074	0.374856	0.990959	4	18.3512	18.7062	18.3006	18.3506
P0DP91	ERPG3_HUMAN	ERCC6	Chimeric ERCC6-PGBD3 protein OS=Homo sapiens OX=9606 GN=ERCC6 PE=1 SV=1	119.487	1061	1.15109	0.202998	0.319926	0.990959	4	19.5944	19.469	19.4702	19.1873
P49902	5NTC_HUMAN	NT5C2	Cytosolic purine 5'-nucleotidase OS=Homo sapiens OX=9606 GN=NT5C2 PE=1 SV=1	64.97	561	1.15105	0.202957	0.176297	0.990959	4	20.1898	20.2016	19.8942	20.0914
B0I1T2	MYO1G_HUMAN	MYO1G	Unconventional myosin-Ig OS=Homo sapiens OX=9606 GN=MYO1G PE=1 SV=2	116.442	1018	1.15088	0.202741	0.730436	0.990959	4	15.9677	15.0923	15.0614	15.5931
Q9Y6M9	NDUB9_HUMAN	NDUFB9	NADH dehydrogenase [ubiquinone] 1 beta subcomplex subunit 9 OS=Homo sapiens OX=9606 GN=NDUFB9 PE=1 SV=3	21.831	179	1.15084	0.202685	0.210107	0.990959	4	20.3236	20.3867	20.2592	20.0457
Q9P246	STIM2_HUMAN	STIM2	Stromal interaction molecule 2 OS=Homo sapiens OX=9606 GN=STIM2 PE=1 SV=2	83.971	746	1.15079	0.202618	0.382416	0.990959	4	17.2469	16.9705	17.0252	16.7869
P49720	PSB3_HUMAN	PSMB3	Proteasome subunit beta type-3 OS=Homo sapiens OX=9606 GN=PSMB3 PE=1 SV=2	22.949	205	1.15046	0.202217	0.677264	0.990959	4	21.7384	21.8424	21.1721	22.0043
Q8TDN4	CABL1_HUMAN	CABLES1	CDK5 and ABL1 enzyme substrate 1 OS=Homo sapiens OX=9606 GN=CABLES1 PE=1 SV=2	67.599	633	1.15034	0.202057	0.394852	0.990959	4	17.5301	17.1963	17.0747	17.2476
Q8TEY7	UBP33_HUMAN	USP33	Ubiquitin carboxyl-terminal hydrolase 33 OS=Homo sapiens OX=9606 GN=USP33 PE=1 SV=2	106.727	942	1.15027	0.201969	0.428806	0.990959	4	17.911	17.8234	17.4648	17.8658
Q9BUR4	TCAB1_HUMAN	WRAP53	Telomerase Cajal body protein 1 OS=Homo sapiens OX=9606 GN=WRAP53 PE=1 SV=1	59.309	548	1.15015	0.201826	0.684245	0.990959	4	19.0573	18.5758	18.2598	18.9696
P62847	RS24_HUMAN	RPS24	40S ribosomal protein S24 OS=Homo sapiens OX=9606 GN=RPS24 PE=1 SV=1	15.423	133	1.14986	0.201454	0.513547	0.990959	4	21.0435	20.6749	20.4803	20.8353
Q6IC98	GRAM4_HUMAN	GRAMD4	GRAM domain-containing protein 4 OS=Homo sapiens OX=9606 GN=GRAMD4 PE=1 SV=1	66.408	578	1.14945	0.200947	0.157393	0.990959	4	16.107	15.9852	15.9125	15.7778
Q92575	UBXN4_HUMAN	UBXN4	UBX domain-containing protein 4 OS=Homo sapiens OX=9606 GN=UBXN4 PE=1 SV=2	56.778	508	1.14925	0.200691	0.471211	0.990959	4	20.8696	20.8068	20.4119	20.8631
Q07617	SPAG1_HUMAN	SPAG1	Sperm-associated antigen 1 OS=Homo sapiens OX=9606 GN=SPAG1 PE=1 SV=3	103.639	926	1.14912	0.200535	0.568247	0.990959	4	17.34	17.1777	17.3432	16.7734
Q9UKT8	FBXW2_HUMAN	FBXW2	F-box/WD repeat-containing protein 2 OS=Homo sapiens OX=9606 GN=FBXW2 PE=1 SV=2	51.512	454	1.14889	0.200235	0.491539	0.990959	4	16.6465	16.2238	16.3482	16.1216
Q9UGP5	DPOLL_HUMAN	POLL	DNA polymerase lambda OS=Homo sapiens OX=9606 GN=POLL PE=1 SV=1	63.482	575	1.14868	0.199974	0.810187	0.993107	4	15.9965	15.4814	14.8544	16.2236
Q5D1E8	ZC12A_HUMAN	ZC3H12A	Endoribonuclease ZC3H12A OS=Homo sapiens OX=9606 GN=ZC3H12A PE=1 SV=1	65.699	599	1.14857	0.199834	0.345169	0.990959	4	17.8877	17.8045	17.4886	17.804
Q9BW04	SARG_HUMAN	SARG	Specifically androgen-regulated gene protein OS=Homo sapiens OX=9606 GN=SARG PE=1 SV=2	63.964	601	1.14852	0.199777	0.109084	0.990959	4	16.6207	16.6862	16.3895	16.5178
Q53LP3	SWAHC_HUMAN	SOWAHC	Ankyrin repeat domain-containing protein SOWAHC OS=Homo sapiens OX=9606 GN=SOWAHC PE=1 SV=1	55.672	525	1.14848	0.199727	0.121323	0.990959	4	19.7251	19.7312	19.4518	19.6051
Q9H0R1	AP5M1_HUMAN	AP5M1	AP-5 complex subunit mu-1 OS=Homo sapiens OX=9606 GN=AP5M1 PE=1 SV=2	54.767	490	1.14832	0.19953	0.459373	0.990959	4	16.9338	17.2905	16.7845	17.0407
Q15390	MTFR1_HUMAN	MTFR1	Mitochondrial fission regulator 1 OS=Homo sapiens OX=9606 GN=MTFR1 PE=1 SV=2	37.001	333	1.14826	0.199454	0.646526	0.990959	4	17.1521	17.2251	17.3606	16.6177
Q9UQR1	ZN148_HUMAN	ZNF148	Zinc finger protein 148 OS=Homo sapiens OX=9606 GN=ZNF148 PE=1 SV=2	88.976	794	1.1482	0.199374	0.000357362	0.254977	4	18.8168	18.8174	18.614	18.6215
Q68EM7	RHG17_HUMAN	ARHGAP17	Rho GTPase-activating protein 17 OS=Homo sapiens OX=9606 GN=ARHGAP17 PE=1 SV=1	95.437	881	1.14818	0.199348	0.166069	0.990959	4	20.0087	20.167	19.8391	19.9379
P10646	TFPI1_HUMAN	TFPI	Tissue factor pathway inhibitor OS=Homo sapiens OX=9606 GN=TFPI PE=1 SV=1	35.015	304	1.1476	0.19862	0.578361	0.990959	4	16.4194	15.9104	15.8036	16.129
O95696	BRD1_HUMAN	BRD1	Bromodomain-containing protein 1 OS=Homo sapiens OX=9606 GN=BRD1 PE=1 SV=1	119.52	1058	1.14746	0.198439	0.205967	0.990959	4	18.6222	18.7208	18.5685	18.3776
Q13901	C1D_HUMAN	C1D	Nuclear nucleic acid-binding protein C1D OS=Homo sapiens OX=9606 GN=C1D PE=1 SV=1	16.019	141	1.14743	0.198409	0.546492	0.990959	4	21.2255	21.1613	20.7211	21.2688
Q7Z6V5	ADAT2_HUMAN	ADAT2	tRNA-specific adenosine deaminase 2 OS=Homo sapiens OX=9606 GN=ADAT2 PE=1 SV=1	21.046	191	1.14712	0.198012	0.32025	0.990959	4	16.6148	16.9131	16.5899	16.5418
Q9NQG1	MANBL_HUMAN	MANBAL	Protein MANBAL OS=Homo sapiens OX=9606 GN=MANBAL PE=1 SV=1	9.467	85	1.14656	0.197317	0.635646	0.990959	4	17.6872	17.9114	17.2634	17.9405
Q9H0N5	PHS2_HUMAN	PCBD2	Pterin-4-alpha-carbinolamine dehydratase 2 OS=Homo sapiens OX=9606 GN=PCBD2 PE=1 SV=4	14.365	130	1.14615	0.196796	0.733636	0.990959	4	20.4529	19.9634	20.4514	19.5713
O60739	EIF1B_HUMAN	EIF1B	Eukaryotic translation initiation factor 1b OS=Homo sapiens OX=9606 GN=EIF1B PE=1 SV=2	12.824	113	1.1459	0.196481	0.566164	0.990959	4	15.5919	16.1688	15.6919	15.6758
Q9BU23	LMF2_HUMAN	LMF2	Lipase maturation factor 2 OS=Homo sapiens OX=9606 GN=LMF2 PE=1 SV=2	79.698	707	1.14584	0.1964	0.564426	0.990959	4	19.2292	19.2232	18.7428	19.3168
Q9NZN5	ARHGC_HUMAN	ARHGEF12	Rho guanine nucleotide exchange factor 12 OS=Homo sapiens OX=9606 GN=ARHGEF12 PE=1 SV=1	173.232	1544	1.14566	0.196174	0.633982	0.990959	4	16.2212	15.7799	16.0795	15.5292
Q8WWW0	RASF5_HUMAN	RASSF5	Ras association domain-containing protein 5 OS=Homo sapiens OX=9606 GN=RASSF5 PE=1 SV=1	47.09	418	1.14565	0.196162	0.0650396	0.990959	4	18.179	18.1816	17.9315	18.0367
A6NIH7	U119B_HUMAN	UNC119B	Protein unc-119 homolog B OS=Homo sapiens OX=9606 GN=UNC119B PE=1 SV=1	28.137	251	1.14562	0.19613	0.552451	0.990959	4	19.4196	19.2407	18.8718	19.3963
A6ZKI3	RTL8C_HUMAN	RTL8C	Retrotransposon Gag-like protein 8C OS=Homo sapiens OX=9606 GN=RTL8C PE=1 SV=1	13.171	113	1.14534	0.195775	0.420268	0.990959	4	17.9988	17.9758	17.5973	17.9857
Q9UJX3	APC7_HUMAN	ANAPC7	Anaphase-promoting complex subunit 7 OS=Homo sapiens OX=9606 GN=ANAPC7 PE=1 SV=4	66.856	599	1.14529	0.195718	0.221509	0.990959	4	20.7559	20.7336	20.438	20.6601
Q9H6Y7	RN167_HUMAN	RNF167	E3 ubiquitin-protein ligase RNF167 OS=Homo sapiens OX=9606 GN=RNF167 PE=1 SV=1	38.299	350	1.14522	0.195619	0.704206	0.990959	4	18.1058	18.3077	17.576	18.4463
Q9H497	TOR3A_HUMAN	TOR3A	Torsin-3A OS=Homo sapiens OX=9606 GN=TOR3A PE=1 SV=1	46.199	397	1.144	0.194086	0.535994	0.990959	4	19.2179	18.7008	18.7227	18.8078
Q96ER9	MITOK_HUMAN	CCDC51	Mitochondrial potassium channel OS=Homo sapiens OX=9606 GN=CCDC51 PE=1 SV=2	45.811	411	1.14397	0.194044	0.444705	0.990959	4	20.1262	20.1033	19.7155	20.1259
Q9HC07	TM165_HUMAN	TMEM165	Transmembrane protein 165 OS=Homo sapiens OX=9606 GN=TMEM165 PE=1 SV=1	34.906	324	1.14345	0.193393	0.409916	0.990959	4	20.5809	20.322	20.3931	20.123
P07737	PROF1_HUMAN	PFN1	Profilin-1 OS=Homo sapiens OX=9606 GN=PFN1 PE=1 SV=2	15.054	140	1.1434	0.193334	0.60831	0.990959	4	27.5364	27.6525	27.0853	27.7169
Q86Y91	KI18B_HUMAN	KIF18B	Kinesin-like protein KIF18B OS=Homo sapiens OX=9606 GN=KIF18B PE=1 SV=4	93.011	852	1.14338	0.193307	0.0333306	0.990959	4	19.3783	19.367	19.2151	19.1436
P62910	RL32_HUMAN	RPL32	60S ribosomal protein L32 OS=Homo sapiens OX=9606 GN=RPL32 PE=1 SV=2	15.86	135	1.14269	0.192435	0.256454	0.990959	4	23.8817	24.0852	23.723	23.859
Q13356	PPIL2_HUMAN	PPIL2	RING-type E3 ubiquitin-protein ligase PPIL2 OS=Homo sapiens OX=9606 GN=PPIL2 PE=1 SV=1	58.823	520	1.14254	0.192242	0.304375	0.990959	4	18.8896	18.925	18.5758	18.8543
Q9UPS6	SET1B_HUMAN	SETD1B	Histone-lysine N-methyltransferase SETD1B OS=Homo sapiens OX=9606 GN=SETD1B PE=1 SV=3	212.803	1966	1.14252	0.192222	0.253051	0.990959	4	17.4629	17.6848	17.3333	17.43
P28072	PSB6_HUMAN	PSMB6	Proteasome subunit beta type-6 OS=Homo sapiens OX=9606 GN=PSMB6 PE=1 SV=4	25.358	239	1.14245	0.192133	0.327228	0.990959	4	22.7151	22.7115	22.3718	22.6705
Q9UDY4	DNJB4_HUMAN	DNAJB4	DnaJ homolog subfamily B member 4 OS=Homo sapiens OX=9606 GN=DNAJB4 PE=1 SV=1	37.807	337	1.14237	0.192031	0.254968	0.990959	4	21.997	21.8509	21.6347	21.8291
Q01664	TFAP4_HUMAN	TFAP4	Transcription factor AP-4 OS=Homo sapiens OX=9606 GN=TFAP4 PE=1 SV=2	38.726	338	1.14235	0.192	0.492152	0.990959	4	18.5917	18.1474	18.1169	18.2382
Q9H5U6	ZCHC4_HUMAN	ZCCHC4	rRNA N6-adenosine-methyltransferase ZCCHC4 OS=Homo sapiens OX=9606 GN=ZCCHC4 PE=1 SV=3	59.01	513	1.14215	0.191758	0.476474	0.990959	4	19.2088	18.8732	18.7059	18.9926
P0C1Z6	TFPT_HUMAN	TFPT	TCF3 fusion partner OS=Homo sapiens OX=9606 GN=TFPT PE=1 SV=1	28.278	253	1.14209	0.191674	0.372864	0.990959	4	16.66	16.6085	16.2762	16.6089
Q96DX4	RSPRY_HUMAN	RSPRY1	RING finger and SPRY domain-containing protein 1 OS=Homo sapiens OX=9606 GN=RSPRY1 PE=1 SV=1	64.18	576	1.14181	0.191326	0.192572	0.990959	4	17.8619	17.8505	17.5662	17.7636
Q8N0Z3	SPICE_HUMAN	SPICE1	Spindle and centriole-associated protein 1 OS=Homo sapiens OX=9606 GN=SPICE1 PE=1 SV=1	96.264	855	1.14095	0.190231	0.325146	0.990959	4	17.4948	17.2155	17.1187	17.2111
P30049	ATPD_HUMAN	ATP5F1D	ATP synthase subunit delta, mitochondrial OS=Homo sapiens OX=9606 GN=ATP5F1D PE=1 SV=2	17.49	168	1.14094	0.190229	0.536975	0.990959	4	25.0769	24.5638	24.6524	24.6079
Q9NWM0	SMOX_HUMAN	SMOX	Spermine oxidase OS=Homo sapiens OX=9606 GN=SMOX PE=1 SV=1	61.819	555	1.14078	0.190015	0.190074	0.990959	4	17.7098	17.7841	17.467	17.6468
Q9Y620	RA54B_HUMAN	RAD54B	DNA repair and recombination protein RAD54B OS=Homo sapiens OX=9606 GN=RAD54B PE=1 SV=1	102.967	910	1.14077	0.190007	0.27932	0.990959	4	17.5694	17.6082	17.271	17.5266
O75145	LIPA3_HUMAN	PPFIA3	Liprin-alpha-3 OS=Homo sapiens OX=9606 GN=PPFIA3 PE=1 SV=3	133.496	1194	1.14068	0.189898	0.832518	0.993107	4	16.8099	15.2462	15.954	15.7223
P53597	SUCA_HUMAN	SUCLG1	Succinate--CoA ligase [ADP/GDP-forming] subunit alpha, mitochondrial OS=Homo sapiens OX=9606 GN=SUCLG1 PE=1 SV=4	36.25	346	1.14025	0.189352	0.113394	0.990959	4	22.4941	22.4545	22.218	22.3519
Q13011	ECH1_HUMAN	ECH1	Delta(3,5)-Delta(2,4)-dienoyl-CoA isomerase, mitochondrial OS=Homo sapiens OX=9606 GN=ECH1 PE=1 SV=2	35.816	328	1.14019	0.189271	0.332213	0.990959	4	22.4792	22.6761	22.2763	22.5004
Q96EP5	DAZP1_HUMAN	DAZAP1	DAZ-associated protein 1 OS=Homo sapiens OX=9606 GN=DAZAP1 PE=1 SV=1	43.383	407	1.14006	0.189107	0.53492	0.990959	4	19.4711	19.6782	19.153	19.6181
Q9UJY5	GGA1_HUMAN	GGA1	ADP-ribosylation factor-binding protein GGA1 OS=Homo sapiens OX=9606 GN=GGA1 PE=1 SV=1	70.384	639	1.13994	0.188961	0.18	0.990959	4	19.2952	19.2557	18.9953	19.1776
Q5T9L3	WLS_HUMAN	WLS	Protein wntless homolog OS=Homo sapiens OX=9606 GN=WLS PE=1 SV=2	62.253	541	1.13977	0.188741	0.171076	0.990959	4	18.6922	18.7324	18.4358	18.6114
Q6YHU6	THADA_HUMAN	THADA	Thyroid adenoma-associated protein OS=Homo sapiens OX=9606 GN=THADA PE=1 SV=1	219.607	1953	1.13963	0.18856	0.13174	0.990959	4	18.3972	18.3406	18.2511	18.1096
Q8IX18	DHX40_HUMAN	DHX40	Probable ATP-dependent RNA helicase DHX40 OS=Homo sapiens OX=9606 GN=DHX40 PE=1 SV=2	88.56	779	1.13957	0.188493	0.215585	0.990959	4	19.4083	19.4394	19.1311	19.3396
Q92785	REQU_HUMAN	DPF2	Zinc finger protein ubi-d4 OS=Homo sapiens OX=9606 GN=DPF2 PE=1 SV=2	44.155	391	1.13946	0.188354	0.331843	0.990959	4	19.4035	19.6813	19.3021	19.4061
Q9NPA3	M1IP1_HUMAN	MID1IP1	Mid1-interacting protein 1 OS=Homo sapiens OX=9606 GN=MID1IP1 PE=1 SV=1	20.202	183	1.13944	0.188321	0.624582	0.990959	4	17.5363	17.4718	16.9885	17.6429
Q68CP4	HGNAT_HUMAN	HGSNAT	Heparan-alpha-glucosaminide N-acetyltransferase OS=Homo sapiens OX=9606 GN=HGSNAT PE=1 SV=2	73.293	663	1.13931	0.188162	0.327488	0.990959	4	17.8191	17.6255	17.644	17.4243
Q6ZYL4	TF2H5_HUMAN	GTF2H5	General transcription factor IIH subunit 5 OS=Homo sapiens OX=9606 GN=GTF2H5 PE=1 SV=1	8.053	71	1.13879	0.187507	0.475336	0.990959	4	18.9665	19.237	18.747	19.0816
Q5T5P2	SKT_HUMAN	KIAA1217	Sickle tail protein homolog OS=Homo sapiens OX=9606 GN=KIAA1217 PE=1 SV=2	214.116	1943	1.13876	0.187463	0.158817	0.990959	4	16.5765	16.5756	16.4738	16.3034
Q96EI5	TCAL4_HUMAN	TCEAL4	Transcription elongation factor A protein-like 4 OS=Homo sapiens OX=9606 GN=TCEAL4 PE=1 SV=2	24.647	215	1.13823	0.186787	0.276928	0.990959	4	19.28	19.4152	19.0543	19.2673
Q7LGA3	HS2ST_HUMAN	HS2ST1	Heparan sulfate 2-O-sulfotransferase 1 OS=Homo sapiens OX=9606 GN=HS2ST1 PE=1 SV=1	41.881	356	1.13811	0.186635	0.0571061	0.990959	4	20.1733	20.0801	19.9414	19.9387
Q9Y281	COF2_HUMAN	CFL2	Cofilin-2 OS=Homo sapiens OX=9606 GN=CFL2 PE=1 SV=1	18.737	166	1.13797	0.186459	0.542572	0.990959	4	20.6116	20.6982	20.2158	20.721
P46976	GLYG_HUMAN	GYG1	Glycogenin-1 OS=Homo sapiens OX=9606 GN=GYG1 PE=1 SV=4	39.384	350	1.13764	0.186046	0.598568	0.990959	4	21.9726	21.7127	21.386	21.9272
Q9H0U3	MAGT1_HUMAN	MAGT1	Magnesium transporter protein 1 OS=Homo sapiens OX=9606 GN=MAGT1 PE=1 SV=1	38.037	335	1.13741	0.185753	0.23103	0.990959	4	19.9957	19.9105	19.6668	19.8679
Q8WWH5	TRUB1_HUMAN	TRUB1	Probable tRNA pseudouridine synthase 1 OS=Homo sapiens OX=9606 GN=TRUB1 PE=1 SV=1	37.253	349	1.13732	0.185643	0.169799	0.990959	4	19.2077	19.2846	18.9812	19.1398
Q9BW91	NUDT9_HUMAN	NUDT9	ADP-ribose pyrophosphatase, mitochondrial OS=Homo sapiens OX=9606 GN=NUDT9 PE=1 SV=1	39.125	350	1.13728	0.185589	0.206355	0.990959	4	19.4944	19.3271	19.1693	19.281
L0R819	ASURF_HUMAN	ASDURF	ASNSD1 upstream open reading frame protein OS=Homo sapiens OX=9606 GN=ASDURF PE=1 SV=1	11.25	96	1.13696	0.185183	0.393999	0.990959	4	18.4276	18.1123	18.1533	18.0162
O94762	RECQ5_HUMAN	RECQL5	ATP-dependent DNA helicase Q5 OS=Homo sapiens OX=9606 GN=RECQL5 PE=1 SV=2	108.858	991	1.13692	0.185129	0.169543	0.990959	4	21.309	21.2449	21.1736	21.0101
Q6ZT12	UBR3_HUMAN	UBR3	E3 ubiquitin-protein ligase UBR3 OS=Homo sapiens OX=9606 GN=UBR3 PE=2 SV=2	212.433	1888	1.1369	0.185104	0.796148	0.993107	4	16.1252	15.582	16.2353	15.1016
Q16584	M3K11_HUMAN	MAP3K11	Mitogen-activated protein kinase kinase kinase 11 OS=Homo sapiens OX=9606 GN=MAP3K11 PE=1 SV=1	92.688	847	1.13667	0.184815	0.0701159	0.990959	4	17.1467	17.0489	16.9297	16.8963
Q9UBP6	TRMB_HUMAN	METTL1	tRNA (guanine-N(7)-)-methyltransferase OS=Homo sapiens OX=9606 GN=METTL1 PE=1 SV=1	31.471	276	1.13666	0.184796	0.437553	0.990959	4	19.5526	19.7366	19.2912	19.6284
P46781	RS9_HUMAN	RPS9	40S ribosomal protein S9 OS=Homo sapiens OX=9606 GN=RPS9 PE=1 SV=3	22.591	194	1.13655	0.184655	0.169211	0.990959	4	25.8384	25.7895	25.5453	25.7133
Q5TKA1	LIN9_HUMAN	LIN9	Protein lin-9 homolog OS=Homo sapiens OX=9606 GN=LIN9 PE=1 SV=1	61.946	542	1.13633	0.184385	0.581549	0.990959	4	16.6582	16.7219	16.7869	16.2245
Q99504	EYA3_HUMAN	EYA3	Eyes absent homolog 3 OS=Homo sapiens OX=9606 GN=EYA3 PE=1 SV=3	62.663	573	1.13617	0.184176	0.418105	0.990959	4	17.9654	17.604	17.6221	17.5789
Q9Y3B1	PLD3B_HUMAN	PRELID3B	PRELI domain containing protein 3B OS=Homo sapiens OX=9606 GN=PRELID3B PE=1 SV=2	21.495	194	1.13614	0.184135	0.011777	0.990959	4	17.6927	17.6921	17.4881	17.5284
Q9BTE6	AASD1_HUMAN	AARSD1	Alanyl-tRNA editing protein Aarsd1 OS=Homo sapiens OX=9606 GN=AARSD1 PE=1 SV=2	45.48	412	1.13612	0.184118	0.268596	0.990959	4	20.2602	20.2702	19.9598	20.2024
Q8IXI2	MIRO1_HUMAN	RHOT1	Mitochondrial Rho GTPase 1 OS=Homo sapiens OX=9606 GN=RHOT1 PE=1 SV=2	70.784	618	1.13573	0.183625	0.0976652	0.990959	4	19.0456	19.1317	18.9496	18.8604
O43663	PRC1_HUMAN	PRC1	Protein regulator of cytokinesis 1 OS=Homo sapiens OX=9606 GN=PRC1 PE=1 SV=2	71.607	620	1.13551	0.183343	0.0706352	0.990959	4	20.9231	20.8324	20.6701	20.7188
A6NJ78	MET15_HUMAN	METTL15	12S rRNA N4-methylcytidine (m4C) methyltransferase OS=Homo sapiens OX=9606 GN=METTL15 PE=1 SV=1	46.121	407	1.13516	0.1829	0.620785	0.990959	4	18.4771	17.9423	17.8593	18.1944
P62745	RHOB_HUMAN	RHOB	Rho-related GTP-binding protein RhoB OS=Homo sapiens OX=9606 GN=RHOB PE=1 SV=1	22.123	196	1.13498	0.182663	0.629588	0.990959	4	20.2228	20.5071	19.8912	20.4733
Q9NXX6	NSE4A_HUMAN	NSMCE4A	Non-structural maintenance of chromosomes element 4 homolog A OS=Homo sapiens OX=9606 GN=NSMCE4A PE=1 SV=2	44.301	385	1.13469	0.182302	0.370872	0.990959	4	18.5855	18.436	18.469	18.1878
Q9H2D1	MFTC_HUMAN	SLC25A32	Mitochondrial folate transporter/carrier OS=Homo sapiens OX=9606 GN=SLC25A32 PE=1 SV=2	35.407	315	1.1345	0.182057	0.282745	0.990959	4	17.8172	17.7025	17.4667	17.689
Q96N11	CG026_HUMAN	C7orf26	Uncharacterized protein C7orf26 OS=Homo sapiens OX=9606 GN=C7orf26 PE=2 SV=1	50.047	449	1.13445	0.181997	0.624715	0.990959	4	16.7287	17.0767	16.4547	16.9867
Q7L8J4	3BP5L_HUMAN	SH3BP5L	SH3 domain-binding protein 5-like OS=Homo sapiens OX=9606 GN=SH3BP5L PE=1 SV=1	43.499	393	1.13431	0.181817	0.204465	0.990959	4	16.1681	16.3591	16.06	16.1036
Q8N4C8	MINK1_HUMAN	MINK1	Misshapen-like kinase 1 OS=Homo sapiens OX=9606 GN=MINK1 PE=1 SV=2	149.822	1332	1.13425	0.181741	0.0783673	0.990959	4	17.7742	17.669	17.5525	17.5271
Q86U90	YRDC_HUMAN	YRDC	YrdC domain-containing protein, mitochondrial OS=Homo sapiens OX=9606 GN=YRDC PE=1 SV=1	29.328	279	1.1341	0.181547	0.111948	0.990959	4	20.8651	20.9325	20.66	20.7745
O43924	PDE6D_HUMAN	PDE6D	Retinal rod rhodopsin-sensitive cGMP 3',5'-cyclic phosphodiesterase subunit delta OS=Homo sapiens OX=9606 GN=PDE6D PE=1 SV=1	17.42	150	1.13391	0.181304	0.0344745	0.990959	4	18.242	18.2297	18.0206	18.0886
Q96HP4	OXND1_HUMAN	OXNAD1	Oxidoreductase NAD-binding domain-containing protein 1 OS=Homo sapiens OX=9606 GN=OXNAD1 PE=1 SV=1	34.854	312	1.13374	0.181094	0.568264	0.990959	4	19.7402	19.6255	19.7631	19.2405
Q15022	SUZ12_HUMAN	SUZ12	Polycomb protein SUZ12 OS=Homo sapiens OX=9606 GN=SUZ12 PE=1 SV=3	83.055	739	1.13341	0.180667	0.0434543	0.990959	4	18.848	18.9137	18.7211	18.6792
O43752	STX6_HUMAN	STX6	Syntaxin-6 OS=Homo sapiens OX=9606 GN=STX6 PE=1 SV=1	29.176	255	1.13319	0.180396	0.531572	0.990959	4	19.8713	19.7553	19.3994	19.8664
P01116	RASK_HUMAN	KRAS	GTPase KRas OS=Homo sapiens OX=9606 GN=KRAS PE=1 SV=1	21.656	189	1.1331	0.180279	0.199492	0.990959	4	19.4666	19.3128	19.266	19.1529
Q99741	CDC6_HUMAN	CDC6	Cell division control protein 6 homolog OS=Homo sapiens OX=9606 GN=CDC6 PE=1 SV=1	62.72	560	1.13308	0.180248	0.301124	0.990959	4	18.503	18.2885	18.1412	18.2897
Q9BZL4	PP12C_HUMAN	PPP1R12C	Protein phosphatase 1 regulatory subunit 12C OS=Homo sapiens OX=9606 GN=PPP1R12C PE=1 SV=1	84.881	782	1.13293	0.180063	0.166548	0.990959	4	17.3619	17.2157	17.0665	17.151
Q86SQ9	DHDDS_HUMAN	DHDDS	Dehydrodolichyl diphosphate synthase complex subunit DHDDS OS=Homo sapiens OX=9606 GN=DHDDS PE=1 SV=3	38.657	333	1.13289	0.18001	0.539621	0.990959	4	18.1662	18.319	18.2959	17.8294
P26232	CTNA2_HUMAN	CTNNA2	Catenin alpha-2 OS=Homo sapiens OX=9606 GN=CTNNA2 PE=1 SV=5	105.313	953	1.13284	0.179943	0.532117	0.990959	4	19.796	19.6901	19.3287	19.7975
O00212	RHOD_HUMAN	RHOD	Rho-related GTP-binding protein RhoD OS=Homo sapiens OX=9606 GN=RHOD PE=1 SV=2	23.413	210	1.13281	0.179903	0.162792	0.990959	4	18.579	18.5755	18.4804	18.3143
Q9NW81	DMAC2_HUMAN	DMAC2	Distal membrane-arm assembly complex protein 2 OS=Homo sapiens OX=9606 GN=DMAC2 PE=1 SV=3	29.267	257	1.13253	0.179548	0.544164	0.990959	4	18.1921	18.0366	17.6994	18.1702
Q8N0V3	RBFA_HUMAN	RBFA	Putative ribosome-binding factor A, mitochondrial OS=Homo sapiens OX=9606 GN=RBFA PE=1 SV=3	38.359	343	1.13223	0.179171	0.665265	0.990959	4	17.7726	17.1716	17.485	17.1009
Q9H6E5	STPAP_HUMAN	TUT1	Speckle targeted PIP5K1A-regulated poly(A) polymerase OS=Homo sapiens OX=9606 GN=TUT1 PE=1 SV=2	93.847	874	1.13212	0.179029	0.149089	0.990959	4	18.6103	18.6614	18.5306	18.3829
Q4G0F5	VP26B_HUMAN	VPS26B	Vacuolar protein sorting-associated protein 26B OS=Homo sapiens OX=9606 GN=VPS26B PE=1 SV=2	39.155	336	1.13211	0.179019	0.518456	0.990959	4	18.9381	18.8896	18.5057	18.9639
Q8NE01	CNNM3_HUMAN	CNNM3	Metal transporter CNNM3 OS=Homo sapiens OX=9606 GN=CNNM3 PE=1 SV=1	76.119	707	1.13208	0.178977	0.219804	0.990959	4	18.5417	18.3421	18.2446	18.2812
P19878	NCF2_HUMAN	NCF2	Neutrophil cytosol factor 2 OS=Homo sapiens OX=9606 GN=NCF2 PE=1 SV=2	59.762	526	1.13194	0.178801	0.261798	0.990959	4	19.6131	19.6563	19.5694	19.3424
Q32P44	EMAL3_HUMAN	EML3	Echinoderm microtubule-associated protein-like 3 OS=Homo sapiens OX=9606 GN=EML3 PE=1 SV=1	95.197	896	1.13178	0.178595	0.50069	0.990959	4	18.0296	17.5922	17.6185	17.6462
Q9NW75	GPTC2_HUMAN	GPATCH2	G patch domain-containing protein 2 OS=Homo sapiens OX=9606 GN=GPATCH2 PE=1 SV=1	58.944	528	1.13173	0.178528	0.322878	0.990959	4	17.2764	17.002	16.9613	16.96
P12109	CO6A1_HUMAN	COL6A1	Collagen alpha-1(VI) chain OS=Homo sapiens OX=9606 GN=COL6A1 PE=1 SV=3	108.529	1028	1.13153	0.17827	0.494814	0.990959	4	18.0401	17.6893	17.5615	17.8114
Q9UJJ7	RUSD1_HUMAN	RPUSD1	RNA pseudouridylate synthase domain-containing protein 1 OS=Homo sapiens OX=9606 GN=RPUSD1 PE=1 SV=1	34.756	312	1.1315	0.178241	0.232521	0.990959	4	17.9915	18.197	17.893	17.9389
O95405	ZFYV9_HUMAN	ZFYVE9	Zinc finger FYVE domain-containing protein 9 OS=Homo sapiens OX=9606 GN=ZFYVE9 PE=1 SV=2	156.403	1425	1.1313	0.17798	0.547583	0.990959	4	15.6555	15.2401	15.1342	15.4055
Q8N122	RPTOR_HUMAN	RPTOR	Regulatory-associated protein of mTOR OS=Homo sapiens OX=9606 GN=RPTOR PE=1 SV=1	149.038	1335	1.13101	0.177614	0.165274	0.990959	4	19.711	19.8467	19.6488	19.5537
Q9NQP4	PFD4_HUMAN	PFDN4	Prefoldin subunit 4 OS=Homo sapiens OX=9606 GN=PFDN4 PE=1 SV=1	15.314	134	1.13087	0.177429	0.167383	0.990959	4	20.9633	20.8728	20.6705	20.8108
Q8TCY9	URGCP_HUMAN	URGCP	Up-regulator of cell proliferation OS=Homo sapiens OX=9606 GN=URGCP PE=1 SV=2	104.987	931	1.13085	0.177409	0.427905	0.990959	4	19.1625	19.2506	18.8548	19.2035
Q9BUL5	PHF23_HUMAN	PHF23	PHD finger protein 23 OS=Homo sapiens OX=9606 GN=PHF23 PE=1 SV=1	43.818	403	1.13057	0.177048	0.102597	0.990959	4	18.3224	18.4333	18.1741	18.2275
P98160	PGBM_HUMAN	HSPG2	Basement membrane-specific heparan sulfate proteoglycan core protein OS=Homo sapiens OX=9606 GN=HSPG2 PE=1 SV=4	468.83	4391	1.13042	0.176861	0.662901	0.990959	4	16.9264	16.6079	16.2794	16.9011
Q5T440	CAF17_HUMAN	IBA57	Putative transferase CAF17, mitochondrial OS=Homo sapiens OX=9606 GN=IBA57 PE=1 SV=1	38.155	356	1.13036	0.176784	0.217439	0.990959	4	19.1797	18.995	18.8737	18.9474
Q9UER7	DAXX_HUMAN	DAXX	Death domain-associated protein 6 OS=Homo sapiens OX=9606 GN=DAXX PE=1 SV=2	81.373	740	1.13026	0.17666	0.171467	0.990959	4	18.5263	18.3977	18.3401	18.2306
Q8IYH5	ZZZ3_HUMAN	ZZZ3	ZZ-type zinc finger-containing protein 3 OS=Homo sapiens OX=9606 GN=ZZZ3 PE=1 SV=1	102.023	903	1.13005	0.176392	0.494931	0.990959	4	17.4955	17.765	17.619	17.2887
O43166	SI1L1_HUMAN	SIPA1L1	Signal-induced proliferation-associated 1-like protein 1 OS=Homo sapiens OX=9606 GN=SIPA1L1 PE=1 SV=4	200.029	1804	1.13	0.176322	0.649363	0.990959	4	16.539	16.8617	16.8153	16.2327
Q9NWK9	BCD1_HUMAN	ZNHIT6	Box C/D snoRNA protein 1 OS=Homo sapiens OX=9606 GN=ZNHIT6 PE=1 SV=1	53.918	470	1.12995	0.176265	0.033121	0.990959	4	18.54	18.5271	18.3896	18.325
Q9BRJ6	CG050_HUMAN	C7orf50	Uncharacterized protein C7orf50 OS=Homo sapiens OX=9606 GN=C7orf50 PE=1 SV=1	22.083	194	1.12968	0.17592	0.491155	0.990959	4	21.5111	21.3931	21.0742	21.4782
Q8N653	LZTR1_HUMAN	LZTR1	Leucine-zipper-like transcriptional regulator 1 OS=Homo sapiens OX=9606 GN=LZTR1 PE=1 SV=2	94.719	840	1.12915	0.175236	0.663923	0.990959	4	17.5595	16.9141	16.9333	17.1898
P62917	RL8_HUMAN	RPL8	60S ribosomal protein L8 OS=Homo sapiens OX=9606 GN=RPL8 PE=1 SV=2	28.025	257	1.12912	0.175196	0.281803	0.990959	4	24.4911	24.6044	24.2667	24.4783
O95104	SCAF4_HUMAN	SCAF4	SR-related and CTD-associated factor 4 OS=Homo sapiens OX=9606 GN=SCAF4 PE=1 SV=3	125.869	1147	1.12911	0.17518	0.277657	0.990959	4	17.729	17.5545	17.3862	17.5469
Q8N302	AGGF1_HUMAN	AGGF1	Angiogenic factor with G patch and FHA domains 1 OS=Homo sapiens OX=9606 GN=AGGF1 PE=1 SV=2	80.977	714	1.12908	0.175149	0.0698434	0.990959	4	17.5553	17.502	17.3945	17.3125
Q7Z5L2	R3HCL_HUMAN	R3HCC1L	Coiled-coil domain-containing protein R3HCC1L OS=Homo sapiens OX=9606 GN=R3HCC1L PE=1 SV=3	87.883	792	1.12897	0.175013	0.393943	0.990959	4	15.5793	15.6055	15.5793	15.2555
P16070	CD44_HUMAN	CD44	CD44 antigen OS=Homo sapiens OX=9606 GN=CD44 PE=1 SV=3	81.538	742	1.12852	0.17443	0.384653	0.990959	4	23.4379	23.3955	23.0857	23.3988
Q9NTM9	CUTC_HUMAN	CUTC	Copper homeostasis protein cutC homolog OS=Homo sapiens OX=9606 GN=CUTC PE=1 SV=1	29.341	273	1.1285	0.174409	0.537964	0.990959	4	19.9463	19.9863	19.556	20.0277
Q9Y4K0	LOXL2_HUMAN	LOXL2	Lysyl oxidase homolog 2 OS=Homo sapiens OX=9606 GN=LOXL2 PE=1 SV=1	86.725	774	1.12817	0.173989	0.249111	0.990959	4	17.0425	17.1577	16.8345	17.0177
P20645	MPRD_HUMAN	M6PR	Cation-dependent mannose-6-phosphate receptor OS=Homo sapiens OX=9606 GN=M6PR PE=1 SV=1	30.993	277	1.12804	0.173819	0.314908	0.990959	4	18.7247	18.9851	18.6701	18.6921
Q9UJX5	APC4_HUMAN	ANAPC4	Anaphase-promoting complex subunit 4 OS=Homo sapiens OX=9606 GN=ANAPC4 PE=1 SV=2	92.116	808	1.12798	0.173741	0.184538	0.990959	4	18.6667	18.8408	18.5744	18.5856
Q86SE9	PCGF5_HUMAN	PCGF5	Polycomb group RING finger protein 5 OS=Homo sapiens OX=9606 GN=PCGF5 PE=1 SV=1	29.714	256	1.1279	0.173642	0.570738	0.990959	4	16.4301	16.4548	16.5269	16.0108
Q8TCD1	CR032_HUMAN	C18orf32	UPF0729 protein C18orf32 OS=Homo sapiens OX=9606 GN=C18orf32 PE=1 SV=1	8.669	76	1.12779	0.173498	0.542031	0.990959	4	17.522	17.8857	17.6842	17.3766
O60343	TBCD4_HUMAN	TBC1D4	TBC1 domain family member 4 OS=Homo sapiens OX=9606 GN=TBC1D4 PE=1 SV=2	146.563	1298	1.12777	0.173477	0.384536	0.990959	4	17.9269	17.792	17.8279	17.5441
P09958	FURIN_HUMAN	FURIN	Furin OS=Homo sapiens OX=9606 GN=FURIN PE=1 SV=2	86.678	794	1.12755	0.173192	0.430565	0.990959	4	16.9916	16.7011	16.774	16.5724
Q9Y294	ASF1A_HUMAN	ASF1A	Histone chaperone ASF1A OS=Homo sapiens OX=9606 GN=ASF1A PE=1 SV=1	22.969	204	1.12752	0.173159	0.730292	0.990959	4	17.4341	17.1643	16.7102	17.5419
Q96HY7	DHTK1_HUMAN	DHTKD1	Probable 2-oxoglutarate dehydrogenase E1 component DHKTD1, mitochondrial OS=Homo sapiens OX=9606 GN=DHTKD1 PE=1 SV=2	103.077	919	1.12746	0.173077	0.222511	0.990959	4	17.6814	17.5892	17.3746	17.5498
O76021	RL1D1_HUMAN	RSL1D1	Ribosomal L1 domain-containing protein 1 OS=Homo sapiens OX=9606 GN=RSL1D1 PE=1 SV=3	54.973	490	1.12744	0.173047	0.261947	0.990959	4	23.0281	23.0322	22.9689	22.7452
Q13488	VPP3_HUMAN	TCIRG1	V-type proton ATPase 116 kDa subunit a3 OS=Homo sapiens OX=9606 GN=TCIRG1 PE=1 SV=3	92.968	830	1.12722	0.172772	0.323006	0.990959	4	20.0263	19.8411	19.6657	19.8561
Q6NUT3	MFS12_HUMAN	MFSD12	Major facilitator superfamily domain-containing protein 12 OS=Homo sapiens OX=9606 GN=MFSD12 PE=1 SV=2	52.075	480	1.12711	0.172629	0.455277	0.990959	4	18.8569	18.482	18.4833	18.5103
Q9NYA1	SPHK1_HUMAN	SPHK1	Sphingosine kinase 1 OS=Homo sapiens OX=9606 GN=SPHK1 PE=1 SV=1	42.518	384	1.12698	0.172466	0.259438	0.990959	4	18.785	18.7714	18.4953	18.7162
Q9UJY1	HSPB8_HUMAN	HSPB8	Heat shock protein beta-8 OS=Homo sapiens OX=9606 GN=HSPB8 PE=1 SV=1	21.604	196	1.12694	0.17241	0.0473874	0.990959	4	20.9857	20.9156	20.7612	20.7952
Q9BQ61	TRIR_HUMAN	TRIR	Telomerase RNA component interacting RNase OS=Homo sapiens OX=9606 GN=TRIR PE=1 SV=1	18.419	176	1.12678	0.172202	0.112356	0.990959	4	21.4169	21.3026	21.1607	21.2144
Q9NZW5	MPP6_HUMAN	MPP6	MAGUK p55 subfamily member 6 OS=Homo sapiens OX=9606 GN=MPP6 PE=1 SV=2	61.117	540	1.12669	0.172097	0.117124	0.990959	4	19.7061	19.7062	19.4693	19.5988
Q6ZNB6	NFXL1_HUMAN	NFXL1	NF-X1-type zinc finger protein NFXL1 OS=Homo sapiens OX=9606 GN=NFXL1 PE=1 SV=2	101.339	911	1.12638	0.171697	0.495745	0.990959	4	18.9887	19.3981	18.9851	19.0583
Q96H20	SNF8_HUMAN	SNF8	Vacuolar-sorting protein SNF8 OS=Homo sapiens OX=9606 GN=SNF8 PE=1 SV=1	28.864	258	1.12636	0.171669	0.252962	0.990959	4	20.9186	20.8035	20.7808	20.598
P42226	STAT6_HUMAN	STAT6	Signal transducer and activator of transcription 6 OS=Homo sapiens OX=9606 GN=STAT6 PE=1 SV=1	94.135	847	1.12617	0.171429	0.316815	0.990959	4	19.7946	19.9251	19.5764	19.8003
Q9NRG4	SMYD2_HUMAN	SMYD2	N-lysine methyltransferase SMYD2 OS=Homo sapiens OX=9606 GN=SMYD2 PE=1 SV=2	49.688	433	1.12599	0.171194	0.321507	0.990959	4	18.7101	18.9588	18.7046	18.6219
Q9BYB4	GNB1L_HUMAN	GNB1L	Guanine nucleotide-binding protein subunit beta-like protein 1 OS=Homo sapiens OX=9606 GN=GNB1L PE=1 SV=2	35.618	327	1.12595	0.171149	0.204611	0.990959	4	16.9707	16.8086	16.7625	16.6745
Q9H8Y8	GORS2_HUMAN	GORASP2	Golgi reassembly-stacking protein 2 OS=Homo sapiens OX=9606 GN=GORASP2 PE=1 SV=3	47.145	452	1.12591	0.171091	0.00179814	0.676999	4	21.1313	21.131	20.9528	20.9673
Q9H9H4	VP37B_HUMAN	VPS37B	Vacuolar protein sorting-associated protein 37B OS=Homo sapiens OX=9606 GN=VPS37B PE=1 SV=1	31.307	285	1.12568	0.170793	0.0232862	0.990959	4	17.5962	17.6145	17.4097	17.4594
Q9BYV8	CEP41_HUMAN	CEP41	Centrosomal protein of 41 kDa OS=Homo sapiens OX=9606 GN=CEP41 PE=1 SV=1	41.368	373	1.12566	0.170766	0.142688	0.990959	4	16.7709	16.8335	16.6968	16.566
Q8TBP6	S2540_HUMAN	SLC25A40	Solute carrier family 25 member 40 OS=Homo sapiens OX=9606 GN=SLC25A40 PE=1 SV=1	38.125	338	1.12564	0.170751	0.340129	0.990959	4	17.5749	17.4768	17.2266	17.4835
P01034	CYTC_HUMAN	CST3	Cystatin-C OS=Homo sapiens OX=9606 GN=CST3 PE=1 SV=1	15.799	146	1.12554	0.170615	0.673076	0.990959	4	18.8165	18.8917	18.3368	19.0302
Q9H4L7	SMRCD_HUMAN	SMARCAD1	SWI/SNF-related matrix-associated actin-dependent regulator of chromatin subfamily A containing DEAD/H box 1 OS=Homo sapiens OX=9606 GN=SMARCAD1 PE=1 SV=2	117.402	1026	1.12527	0.170265	0.291043	0.990959	4	18.5973	18.4536	18.2594	18.451
P00390	GSHR_HUMAN	GSR	Glutathione reductase, mitochondrial OS=Homo sapiens OX=9606 GN=GSR PE=1 SV=2	56.257	522	1.12518	0.170153	0.447817	0.990959	4	21.8272	21.9929	21.5782	21.9015
Q96IU2	ZBED3_HUMAN	ZBED3	Zinc finger BED domain-containing protein 3 OS=Homo sapiens OX=9606 GN=ZBED3 PE=1 SV=1	25.132	234	1.12503	0.169959	0.696851	0.990959	4	16.8034	16.47	16.1277	16.8058
P61513	RL37A_HUMAN	RPL37A	60S ribosomal protein L37a OS=Homo sapiens OX=9606 GN=RPL37A PE=1 SV=2	10.275	92	1.1249	0.169803	0.383626	0.990959	4	23.3271	23.6133	23.3556	23.2452
Q00536	CDK16_HUMAN	CDK16	Cyclin-dependent kinase 16 OS=Homo sapiens OX=9606 GN=CDK16 PE=1 SV=1	55.716	496	1.12479	0.169651	0.574916	0.990959	4	18.5231	18.579	18.1275	18.6353
O75460	ERN1_HUMAN	ERN1	Serine/threonine-protein kinase/endoribonuclease IRE1 OS=Homo sapiens OX=9606 GN=ERN1 PE=1 SV=2	109.735	977	1.12478	0.169639	0.783231	0.993107	4	16.8038	16.4433	16.9632	15.9447
Q6SPF0	SAMD1_HUMAN	SAMD1	Atherin OS=Homo sapiens OX=9606 GN=SAMD1 PE=1 SV=1	56.052	538	1.12441	0.169169	0.402828	0.990959	4	19.0057	19.2271	18.8308	19.0637
Q5SNT2	TM201_HUMAN	TMEM201	Transmembrane protein 201 OS=Homo sapiens OX=9606 GN=TMEM201 PE=1 SV=1	72.236	666	1.12415	0.16883	0.0646242	0.990959	4	17.9057	17.9888	17.7961	17.7607
Q9HB19	PKHA2_HUMAN	PLEKHA2	Pleckstrin homology domain-containing family A member 2 OS=Homo sapiens OX=9606 GN=PLEKHA2 PE=1 SV=2	47.255	425	1.12412	0.1688	0.153839	0.990959	4	19.4258	19.2764	19.1736	19.191
Q3ZCQ8	TIM50_HUMAN	TIMM50	Mitochondrial import inner membrane translocase subunit TIM50 OS=Homo sapiens OX=9606 GN=TIMM50 PE=1 SV=2	39.646	353	1.12404	0.168698	0.291765	0.990959	4	21.076	21.3017	20.9827	21.0577
Q9BUL9	RPP25_HUMAN	RPP25	Ribonuclease P protein subunit p25 OS=Homo sapiens OX=9606 GN=RPP25 PE=1 SV=1	20.632	199	1.124	0.168638	0.0775014	0.990959	4	20.2191	20.2398	20.1096	20.012
Q9P275	UBP36_HUMAN	USP36	Ubiquitin carboxyl-terminal hydrolase 36 OS=Homo sapiens OX=9606 GN=USP36 PE=1 SV=4	122.908	1123	1.12396	0.168594	0.351908	0.990959	4	19.8707	19.8139	19.5365	19.8109
Q6ULP2	AFTIN_HUMAN	AFTPH	Aftiphilin OS=Homo sapiens OX=9606 GN=AFTPH PE=1 SV=3	102.113	936	1.1238	0.168379	0.248118	0.990959	4	20.0634	19.9475	19.9239	19.7502
Q6GYQ0	RGPA1_HUMAN	RALGAPA1	Ral GTPase-activating protein subunit alpha-1 OS=Homo sapiens OX=9606 GN=RALGAPA1 PE=1 SV=1	229.832	2036	1.1236	0.168124	0.483338	0.990959	4	17.5401	17.9318	17.5888	17.5468
Q9Y3C0	WASC3_HUMAN	WASHC3	WASH complex subunit 3 OS=Homo sapiens OX=9606 GN=WASHC3 PE=1 SV=1	21.173	194	1.12333	0.167787	0.260176	0.990959	4	18.1332	18.2173	18.1068	17.9081
Q9BQC3	DPH2_HUMAN	DPH2	2-(3-amino-3-carboxypropyl)histidine synthase subunit 2 OS=Homo sapiens OX=9606 GN=DPH2 PE=1 SV=1	52.083	489	1.1233	0.167741	0.440377	0.990959	4	19.3071	19.2583	18.941	19.2889
Q99986	VRK1_HUMAN	VRK1	Serine/threonine-protein kinase VRK1 OS=Homo sapiens OX=9606 GN=VRK1 PE=1 SV=1	45.476	396	1.12313	0.167531	0.0183933	0.990959	4	20.1306	20.1636	19.9635	19.9957
P19438	TNR1A_HUMAN	TNFRSF1A	Tumor necrosis factor receptor superfamily member 1A OS=Homo sapiens OX=9606 GN=TNFRSF1A PE=1 SV=1	50.495	455	1.12309	0.167468	0.395586	0.990959	4	19.911	19.7708	19.8129	19.534
Q8N9M1	CS047_HUMAN	C19orf47	Uncharacterized protein C19orf47 OS=Homo sapiens OX=9606 GN=C19orf47 PE=1 SV=1	44.746	422	1.12296	0.167311	0.402561	0.990959	4	17.6111	17.304	17.3306	17.2498
Q9BUE0	MED18_HUMAN	MED18	Mediator of RNA polymerase II transcription subunit 18 OS=Homo sapiens OX=9606 GN=MED18 PE=1 SV=1	23.663	208	1.12294	0.167279	0.369504	0.990959	4	19.2643	18.9732	18.946	18.957
O95835	LATS1_HUMAN	LATS1	Serine/threonine-protein kinase LATS1 OS=Homo sapiens OX=9606 GN=LATS1 PE=1 SV=1	126.87	1130	1.12259	0.166827	0.744377	0.990959	4	17.6194	17.4736	17.8199	16.9396
P85037	FOXK1_HUMAN	FOXK1	Forkhead box protein K1 OS=Homo sapiens OX=9606 GN=FOXK1 PE=1 SV=1	75.457	733	1.12218	0.166308	0.255651	0.990959	4	19.5166	19.6163	19.3071	19.4931
P23381	SYWC_HUMAN	WARS1	Tryptophan--tRNA ligase, cytoplasmic OS=Homo sapiens OX=9606 GN=WARS1 PE=1 SV=2	53.165	471	1.1221	0.166202	0.50076	0.990959	4	22.6045	22.218	22.1799	22.3102
Q8NCE2	MTMRE_HUMAN	MTMR14	Myotubularin-related protein 14 OS=Homo sapiens OX=9606 GN=MTMR14 PE=1 SV=2	72.203	650	1.12207	0.166158	0.559914	0.990959	4	18.1882	18.219	18.2767	17.7982
Q9Y4K3	TRAF6_HUMAN	TRAF6	TNF receptor-associated factor 6 OS=Homo sapiens OX=9606 GN=TRAF6 PE=1 SV=1	59.573	522	1.12134	0.16523	0.294628	0.990959	4	19.3371	19.2689	19.0254	19.2501
Q16626	MEA1_HUMAN	MEA1	Male-enhanced antigen 1 OS=Homo sapiens OX=9606 GN=MEA1 PE=1 SV=2	19.905	185	1.12134	0.165223	0.586507	0.990959	4	19.8212	19.6232	19.3195	19.7944
Q15274	NADC_HUMAN	QPRT	Nicotinate-nucleotide pyrophosphorylase [carboxylating] OS=Homo sapiens OX=9606 GN=QPRT PE=1 SV=3	30.846	297	1.12115	0.164981	0.527865	0.990959	4	22.1436	22.206	21.7943	22.2254
Q9P0S2	COX16_HUMAN	COX16	Cytochrome c oxidase assembly protein COX16 homolog, mitochondrial OS=Homo sapiens OX=9606 GN=COX16 PE=1 SV=1	12.293	106	1.12096	0.164732	0.58735	0.990959	4	18.7628	18.5044	18.2465	18.6911
Q8TBF2	PXL2B_HUMAN	PRXL2B	Prostamide/prostaglandin F synthase OS=Homo sapiens OX=9606 GN=PRXL2B PE=1 SV=1	21.223	198	1.12091	0.164667	0.335328	0.990959	4	17.2777	17.0163	16.9757	16.989
Q96KC2	ARL5B_HUMAN	ARL5B	ADP-ribosylation factor-like protein 5B OS=Homo sapiens OX=9606 GN=ARL5B PE=1 SV=1	20.375	179	1.12062	0.164302	0.564329	0.990959	4	18.8216	18.4286	18.5987	18.3229
P15328	FOLR1_HUMAN	FOLR1	Folate receptor alpha OS=Homo sapiens OX=9606 GN=FOLR1 PE=1 SV=3	29.819	257	1.12041	0.164026	0.436098	0.990959	4	23.0918	23.407	23.022	23.1488
Q9H7N4	SFR19_HUMAN	SCAF1	Splicing factor, arginine/serine-rich 19 OS=Homo sapiens OX=9606 GN=SCAF1 PE=1 SV=3	139.27	1312	1.1204	0.164017	0.157736	0.990959	4	19.2873	19.3927	19.2282	19.1237
Q00577	PURA_HUMAN	PURA	Transcriptional activator protein Pur-alpha OS=Homo sapiens OX=9606 GN=PURA PE=1 SV=2	34.911	322	1.12033	0.163927	0.0330342	0.990959	4	19.6031	19.5554	19.4344	19.3962
Q12913	PTPRJ_HUMAN	PTPRJ	Receptor-type tyrosine-protein phosphatase eta OS=Homo sapiens OX=9606 GN=PTPRJ PE=1 SV=3	145.941	1337	1.12028	0.16386	0.247992	0.990959	4	19.0215	19.014	18.7524	18.9554
Q13445	TMED1_HUMAN	TMED1	Transmembrane emp24 domain-containing protein 1 OS=Homo sapiens OX=9606 GN=TMED1 PE=1 SV=1	25.206	227	1.12019	0.163739	0.0772795	0.990959	4	20.1081	20.0291	19.8769	19.9328
Q96E22	NGBR_HUMAN	NUS1	Dehydrodolichyl diphosphate synthase complex subunit NUS1 OS=Homo sapiens OX=9606 GN=NUS1 PE=1 SV=1	33.224	293	1.12009	0.163614	0.262841	0.990959	4	16.8994	16.7405	16.7266	16.586
Q6NYC1	JMJD6_HUMAN	JMJD6	Bifunctional arginine demethylase and lysyl-hydroxylase JMJD6 OS=Homo sapiens OX=9606 GN=JMJD6 PE=1 SV=1	46.462	403	1.11965	0.163041	0.293412	0.990959	4	21.5279	21.5177	21.2444	21.4751
Q9HBM0	VEZA_HUMAN	VEZT	Vezatin OS=Homo sapiens OX=9606 GN=VEZT PE=1 SV=3	88.665	779	1.11952	0.162883	0.164302	0.990959	4	18.5886	18.4382	18.342	18.359
P46779	RL28_HUMAN	RPL28	60S ribosomal protein L28 OS=Homo sapiens OX=9606 GN=RPL28 PE=1 SV=3	15.748	137	1.11941	0.162743	0.21915	0.990959	4	24.5425	24.3604	24.3023	24.2751
P07093	GDN_HUMAN	SERPINE2	Glia-derived nexin OS=Homo sapiens OX=9606 GN=SERPINE2 PE=1 SV=1	44.002	398	1.11931	0.162607	0.605575	0.990959	4	15.3003	15.4552	15.4716	14.9587
Q9BSK2	S2533_HUMAN	SLC25A33	Solute carrier family 25 member 33 OS=Homo sapiens OX=9606 GN=SLC25A33 PE=1 SV=1	35.375	321	1.11928	0.162566	0.0764116	0.990959	4	18.5085	18.4151	18.2894	18.3092
P10588	NR2F6_HUMAN	NR2F6	Nuclear receptor subfamily 2 group F member 6 OS=Homo sapiens OX=9606 GN=NR2F6 PE=1 SV=2	42.979	404	1.11903	0.162243	0.392981	0.990959	4	18.9796	19.089	19.0119	18.7322
Q8TAD7	OCC1_HUMAN	OCC1	Overexpressed in colon carcinoma 1 protein OS=Homo sapiens OX=9606 GN=OCC1 PE=1 SV=2	6.407	63	1.11872	0.161853	0.811771	0.993107	4	16.4432	15.4229	15.4608	16.0816
P02462	CO4A1_HUMAN	COL4A1	Collagen alpha-1(IV) chain OS=Homo sapiens OX=9606 GN=COL4A1 PE=1 SV=4	160.611	1669	1.11872	0.161845	0.676866	0.990959	4	17.0815	17.2831	16.7008	17.3401
Q7Z6I8	CE024_HUMAN	C5orf24	UPF0461 protein C5orf24 OS=Homo sapiens OX=9606 GN=C5orf24 PE=1 SV=1	20.132	188	1.11866	0.161772	0.633947	0.990959	4	18.5802	18.2685	18.5081	18.017
Q9UNW1	MINP1_HUMAN	MINPP1	Multiple inositol polyphosphate phosphatase 1 OS=Homo sapiens OX=9606 GN=MINPP1 PE=1 SV=1	55.051	487	1.11866	0.16177	0.342771	0.990959	4	18.7174	18.5449	18.3706	18.5682
P42680	TEC_HUMAN	TEC	Tyrosine-protein kinase Tec OS=Homo sapiens OX=9606 GN=TEC PE=1 SV=2	73.581	631	1.11866	0.16177	0.128203	0.990959	4	16.9826	17.0975	16.8494	16.9071
Q2M2I8	AAK1_HUMAN	AAK1	AP2-associated protein kinase 1 OS=Homo sapiens OX=9606 GN=AAK1 PE=1 SV=3	103.885	961	1.11854	0.16162	0.662861	0.990959	4	19.4343	18.8272	19.0678	18.8705
Q9NVT9	ARMC1_HUMAN	ARMC1	Armadillo repeat-containing protein 1 OS=Homo sapiens OX=9606 GN=ARMC1 PE=1 SV=1	31.281	282	1.11852	0.161589	0.135639	0.990959	4	18.5502	18.4231	18.3056	18.3445
Q92796	DLG3_HUMAN	DLG3	Disks large homolog 3 OS=Homo sapiens OX=9606 GN=DLG3 PE=1 SV=2	90.314	817	1.11851	0.161577	0.492088	0.990959	4	17.8101	17.6554	17.3935	17.7488
Q9ULL5	PRR12_HUMAN	PRR12	Proline-rich protein 12 OS=Homo sapiens OX=9606 GN=PRR12 PE=1 SV=3	211.044	2036	1.11826	0.161249	0.396857	0.990959	4	17.6877	17.4061	17.3317	17.4396
P03973	SLPI_HUMAN	SLPI	Antileukoproteinase OS=Homo sapiens OX=9606 GN=SLPI PE=1 SV=2	14.326	132	1.11811	0.161057	0.601195	0.990959	4	18.4333	18.8039	18.2725	18.6426
P62829	RL23_HUMAN	RPL23	60S ribosomal protein L23 OS=Homo sapiens OX=9606 GN=RPL23 PE=1 SV=1	14.865	140	1.11789	0.160776	0.307356	0.990959	4	25.1928	25.294	24.9756	25.1896
Q96ED9	HOOK2_HUMAN	HOOK2	Protein Hook homolog 2 OS=Homo sapiens OX=9606 GN=HOOK2 PE=1 SV=3	83.207	719	1.11758	0.160379	0.066373	0.990959	4	15.2067	15.1243	14.9911	15.0191
Q9BTY2	FUCO2_HUMAN	FUCA2	Plasma alpha-L-fucosidase OS=Homo sapiens OX=9606 GN=FUCA2 PE=1 SV=2	54.067	467	1.11746	0.160229	0.500963	0.990959	4	18.5037	18.7238	18.2904	18.6166
Q9BZF9	UACA_HUMAN	UACA	Uveal autoantigen with coiled-coil domains and ankyrin repeats OS=Homo sapiens OX=9606 GN=UACA PE=1 SV=2	162.505	1416	1.11743	0.160185	0.354188	0.990959	4	18.5236	18.2678	18.2752	18.1958
P55085	PAR2_HUMAN	F2RL1	Proteinase-activated receptor 2 OS=Homo sapiens OX=9606 GN=F2RL1 PE=1 SV=1	44.126	397	1.11743	0.160184	0.57392	0.990959	4	16.9952	16.6126	16.7894	16.4979
Q69YQ0	CYTSA_HUMAN	SPECC1L	Cytospin-A OS=Homo sapiens OX=9606 GN=SPECC1L PE=1 SV=2	124.602	1117	1.11735	0.160077	0.287289	0.990959	4	17.4923	17.677	17.4868	17.3623
Q9UL63	MKLN1_HUMAN	MKLN1	Muskelin OS=Homo sapiens OX=9606 GN=MKLN1 PE=1 SV=2	84.768	735	1.11709	0.159751	0.115494	0.990959	4	18.9567	18.96	18.8581	18.739
O95487	SC24B_HUMAN	SEC24B	Protein transport protein Sec24B OS=Homo sapiens OX=9606 GN=SEC24B PE=1 SV=2	137.418	1268	1.11707	0.159718	0.269343	0.990959	4	19.5962	19.7236	19.5843	19.4161
Q8TBN0	R3GEF_HUMAN	RAB3IL1	Guanine nucleotide exchange factor for Rab-3A OS=Homo sapiens OX=9606 GN=RAB3IL1 PE=1 SV=1	42.637	382	1.11701	0.159636	0.51117	0.990959	4	17.9975	17.5948	17.6301	17.6429
Q96K58	ZN668_HUMAN	ZNF668	Zinc finger protein 668 OS=Homo sapiens OX=9606 GN=ZNF668 PE=1 SV=3	67.89	619	1.11672	0.159263	0.632028	0.990959	4	18.2455	18.8111	18.3371	18.401
Q9Y2Q3	GSTK1_HUMAN	GSTK1	Glutathione S-transferase kappa 1 OS=Homo sapiens OX=9606 GN=GSTK1 PE=1 SV=3	25.497	226	1.11668	0.159219	0.123524	0.990959	4	22.1122	22.0373	21.8663	21.9648
Q9NPI1	BRD7_HUMAN	BRD7	Bromodomain-containing protein 7 OS=Homo sapiens OX=9606 GN=BRD7 PE=1 SV=1	74.139	651	1.1166	0.159106	0.108458	0.990959	4	18.7037	18.6637	18.5782	18.4711
Q53EL6	PDCD4_HUMAN	PDCD4	Programmed cell death protein 4 OS=Homo sapiens OX=9606 GN=PDCD4 PE=1 SV=2	51.735	469	1.11654	0.159031	0.162901	0.990959	4	20.9015	20.9535	20.6997	20.8372
Q9NQ92	COPRS_HUMAN	COPRS	Coordinator of PRMT5 and differentiation stimulator OS=Homo sapiens OX=9606 GN=COPRS PE=1 SV=3	20.066	184	1.11653	0.159026	0.324556	0.990959	4	19.42	19.3007	19.094	19.3086
P80188	NGAL_HUMAN	LCN2	Neutrophil gelatinase-associated lipocalin OS=Homo sapiens OX=9606 GN=LCN2 PE=1 SV=2	22.588	198	1.11649	0.158971	0.596994	0.990959	4	16.899	16.8285	16.452	16.9576
Q8WWB7	GLMP_HUMAN	GLMP	Glycosylated lysosomal membrane protein OS=Homo sapiens OX=9606 GN=GLMP PE=1 SV=1	43.864	406	1.11617	0.158562	0.60941	0.990959	4	18.965	19.0811	19.1223	18.6067
Q14644	RASA3_HUMAN	RASA3	Ras GTPase-activating protein 3 OS=Homo sapiens OX=9606 GN=RASA3 PE=1 SV=3	95.699	834	1.11613	0.158508	0.416156	0.990959	4	16.8651	16.6113	16.4892	16.6702
Q86TS9	RM52_HUMAN	MRPL52	39S ribosomal protein L52, mitochondrial OS=Homo sapiens OX=9606 GN=MRPL52 PE=1 SV=2	13.664	123	1.11581	0.158095	0.577846	0.990959	4	18.3629	18.0286	17.8653	18.2099
Q96FJ2	DYL2_HUMAN	DYNLL2	Dynein light chain 2, cytoplasmic OS=Homo sapiens OX=9606 GN=DYNLL2 PE=1 SV=1	10.35	89	1.11554	0.157744	0.535894	0.990959	4	17.7124	17.6131	17.298	17.712
O43819	SCO2_HUMAN	SCO2	Protein SCO2 homolog, mitochondrial OS=Homo sapiens OX=9606 GN=SCO2 PE=1 SV=3	29.81	266	1.11504	0.1571	0.328618	0.990959	4	20.1009	20.1383	19.8413	20.0837
Q01518	CAP1_HUMAN	CAP1	Adenylyl cyclase-associated protein 1 OS=Homo sapiens OX=9606 GN=CAP1 PE=1 SV=5	51.901	475	1.11494	0.156964	0.368341	0.990959	4	23.1739	23.239	22.9172	23.1818
P23677	IP3KA_HUMAN	ITPKA	Inositol-trisphosphate 3-kinase A OS=Homo sapiens OX=9606 GN=ITPKA PE=1 SV=1	51.009	461	1.11484	0.156839	0.353496	0.990959	4	18.4024	18.1916	18.2177	18.0626
Q9Y3S1	WNK2_HUMAN	WNK2	Serine/threonine-protein kinase WNK2 OS=Homo sapiens OX=9606 GN=WNK2 PE=1 SV=4	242.676	2297	1.11465	0.15659	0.416768	0.990959	4	15.9315	15.74	15.8001	15.5583
Q86WN1	FCSD1_HUMAN	FCHSD1	F-BAR and double SH3 domains protein 1 OS=Homo sapiens OX=9606 GN=FCHSD1 PE=1 SV=1	76.942	690	1.11464	0.156574	0.693371	0.990959	4	17.4626	17.0647	16.8268	17.3873
P49207	RL34_HUMAN	RPL34	60S ribosomal protein L34 OS=Homo sapiens OX=9606 GN=RPL34 PE=1 SV=3	13.293	117	1.11445	0.15633	0.496354	0.990959	4	24.4619	24.458	24.114	24.4932
O60613	SEP15_HUMAN	SELENOF	Selenoprotein F OS=Homo sapiens OX=9606 GN=SELENOF PE=1 SV=4	18.092	165	1.11437	0.156225	0.353532	0.990959	4	18.6211	18.8809	18.6061	18.5834
Q96JP5	ZFP91_HUMAN	ZFP91	E3 ubiquitin-protein ligase ZFP91 OS=Homo sapiens OX=9606 GN=ZFP91 PE=1 SV=1	63.445	570	1.11433	0.156176	0.0142571	0.990959	4	19.0087	19.0461	18.8692	18.8733
Q8WUH6	TM263_HUMAN	TMEM263	Transmembrane protein 263 OS=Homo sapiens OX=9606 GN=TMEM263 PE=1 SV=1	11.748	116	1.11427	0.156101	0.506378	0.990959	4	21.1438	21.2394	20.847	21.224
Q52LR7	EPC2_HUMAN	EPC2	Enhancer of polycomb homolog 2 OS=Homo sapiens OX=9606 GN=EPC2 PE=1 SV=2	91.095	807	1.11415	0.155941	0.428786	0.990959	4	16.9154	16.8684	16.8926	16.5793
Q13625	ASPP2_HUMAN	TP53BP2	Apoptosis-stimulating of p53 protein 2 OS=Homo sapiens OX=9606 GN=TP53BP2 PE=1 SV=2	125.616	1128	1.11412	0.155906	0.105169	0.990959	4	19.5836	19.5622	19.363	19.4709
Q15652	JHD2C_HUMAN	JMJD1C	Probable JmjC domain-containing histone demethylation protein 2C OS=Homo sapiens OX=9606 GN=JMJD1C PE=1 SV=2	284.525	2540	1.11408	0.155859	0.30383	0.990959	4	17.7266	17.7781	17.4858	17.7072
O75448	MED24_HUMAN	MED24	Mediator of RNA polymerase II transcription subunit 24 OS=Homo sapiens OX=9606 GN=MED24 PE=1 SV=1	110.305	989	1.11396	0.155694	0.156385	0.990959	4	18.2156	18.2865	18.0349	18.1558
O75151	PHF2_HUMAN	PHF2	Lysine-specific demethylase PHF2 OS=Homo sapiens OX=9606 GN=PHF2 PE=1 SV=4	120.775	1096	1.11381	0.155501	0.549106	0.990959	4	19.2543	19.5506	19.0875	19.4064
O15061	SYNEM_HUMAN	SYNM	Synemin OS=Homo sapiens OX=9606 GN=SYNM PE=1 SV=2	172.768	1565	1.11377	0.155445	0.309563	0.990959	4	18.323	18.3896	18.0907	18.3111
Q9Y4X5	ARI1_HUMAN	ARIH1	E3 ubiquitin-protein ligase ARIH1 OS=Homo sapiens OX=9606 GN=ARIH1 PE=1 SV=2	64.118	557	1.11368	0.155341	0.542811	0.990959	4	20.2417	20.655	20.2386	20.3475
Q9UBT7	CTNL1_HUMAN	CTNNAL1	Alpha-catulin OS=Homo sapiens OX=9606 GN=CTNNAL1 PE=1 SV=2	81.896	734	1.11337	0.154938	0.321191	0.990959	4	20.1524	19.9458	19.9522	19.836
Q96MH2	HEXI2_HUMAN	HEXIM2	Protein HEXIM2 OS=Homo sapiens OX=9606 GN=HEXIM2 PE=1 SV=1	32.419	286	1.11302	0.154481	0.284057	0.990959	4	19.1711	19.3541	19.0535	19.1627
P25815	S100P_HUMAN	S100P	Protein S100-P OS=Homo sapiens OX=9606 GN=S100P PE=1 SV=2	10.4	95	1.113	0.154457	0.470685	0.990959	4	26.536	26.4884	26.1843	26.5312
P98194	AT2C1_HUMAN	ATP2C1	Calcium-transporting ATPase type 2C member 1 OS=Homo sapiens OX=9606 GN=ATP2C1 PE=1 SV=3	100.577	919	1.11286	0.154278	0.0650584	0.990959	4	19.0257	18.9993	18.819	18.8975
O60291	MGRN1_HUMAN	MGRN1	E3 ubiquitin-protein ligase MGRN1 OS=Homo sapiens OX=9606 GN=MGRN1 PE=1 SV=2	60.753	552	1.11285	0.154264	0.75033	0.990959	4	15.6026	16.0992	15.3541	16.0392
Q8N5C7	DTWD1_HUMAN	DTWD1	tRNA-uridine aminocarboxypropyltransferase 1 OS=Homo sapiens OX=9606 GN=DTWD1 PE=1 SV=1	35.248	304	1.11274	0.154122	0.752018	0.990959	4	16.9177	17.4437	17.3614	16.6918
O43167	ZBT24_HUMAN	ZBTB24	Zinc finger and BTB domain-containing protein 24 OS=Homo sapiens OX=9606 GN=ZBTB24 PE=1 SV=2	78.282	697	1.11251	0.153821	0.662819	0.990959	4	16.7951	16.1983	16.2864	16.3992
Q9BRP4	PAAF1_HUMAN	PAAF1	Proteasomal ATPase-associated factor 1 OS=Homo sapiens OX=9606 GN=PAAF1 PE=1 SV=2	42.19	392	1.11242	0.153705	0.102215	0.990959	4	19.8015	19.8369	19.6152	19.7158
O95881	TXD12_HUMAN	TXNDC12	Thioredoxin domain-containing protein 12 OS=Homo sapiens OX=9606 GN=TXNDC12 PE=1 SV=1	19.206	172	1.11241	0.153694	0.618126	0.990959	4	23.1049	23.1549	22.7144	23.238
Q13823	NOG2_HUMAN	GNL2	Nucleolar GTP-binding protein 2 OS=Homo sapiens OX=9606 GN=GNL2 PE=1 SV=1	83.655	731	1.11234	0.153601	0.303802	0.990959	4	20.6507	20.5948	20.5776	20.3607
O75352	MPU1_HUMAN	MPDU1	Mannose-P-dolichol utilization defect 1 protein OS=Homo sapiens OX=9606 GN=MPDU1 PE=1 SV=2	26.638	247	1.11227	0.15351	0.370925	0.990959	4	21.2807	21.1116	20.9385	21.1467
Q9H6Y2	WDR55_HUMAN	WDR55	WD repeat-containing protein 55 OS=Homo sapiens OX=9606 GN=WDR55 PE=1 SV=2	42.07	383	1.11221	0.153423	0.622032	0.990959	4	19.4808	19.3488	19.0039	19.5188
P62753	RS6_HUMAN	RPS6	40S ribosomal protein S6 OS=Homo sapiens OX=9606 GN=RPS6 PE=1 SV=1	28.681	249	1.11209	0.15328	0.4747	0.990959	4	25.9381	25.7886	25.5512	25.8689
Q92562	FIG4_HUMAN	FIG4	Polyphosphoinositide phosphatase OS=Homo sapiens OX=9606 GN=FIG4 PE=1 SV=1	103.635	907	1.11187	0.152982	0.603436	0.990959	4	15.6988	16.1752	15.8613	15.7068
Q8NC96	NECP1_HUMAN	NECAP1	Adaptin ear-binding coat-associated protein 1 OS=Homo sapiens OX=9606 GN=NECAP1 PE=1 SV=2	29.737	275	1.11168	0.152747	0.175935	0.990959	4	20.2111	20.1267	19.955	20.0773
Q96S55	WRIP1_HUMAN	WRNIP1	ATPase WRNIP1 OS=Homo sapiens OX=9606 GN=WRNIP1 PE=1 SV=2	72.133	665	1.11158	0.152608	0.448883	0.990959	4	19.2756	19.1763	18.9176	19.229
Q5BKT4	AG10A_HUMAN	ALG10	Dol-P-Glc:Glc(2)Man(9)GlcNAc(2)-PP-Dol alpha-1,2-glucosyltransferase OS=Homo sapiens OX=9606 GN=ALG10 PE=1 SV=1	55.606	473	1.11129	0.152237	0.625754	0.990959	4	19.5619	19.2933	19.0449	19.5058
Q8N9F7	GDPD1_HUMAN	GDPD1	Lysophospholipase D GDPD1 OS=Homo sapiens OX=9606 GN=GDPD1 PE=1 SV=2	36.167	314	1.11114	0.152047	0.637638	0.990959	4	15.6665	15.8704	15.8734	15.3593
P12236	ADT3_HUMAN	SLC25A6	ADP/ATP translocase 3 OS=Homo sapiens OX=9606 GN=SLC25A6 PE=1 SV=4	32.866	298	1.11106	0.151931	0.691579	0.990959	4	22.2619	21.8336	21.643	22.1487
Q765P7	MTSS2_HUMAN	MTSS2	Protein MTSS 2 OS=Homo sapiens OX=9606 GN=MTSS2 PE=1 SV=1	79.929	747	1.11098	0.151838	0.819036	0.993107	4	16.5847	15.7902	16.463	15.6082
Q6UVJ0	SAS6_HUMAN	SASS6	Spindle assembly abnormal protein 6 homolog OS=Homo sapiens OX=9606 GN=SASS6 PE=1 SV=1	74.397	657	1.11092	0.151752	0.338809	0.990959	4	18.2487	18.0632	17.9254	18.0831
O95476	CNEP1_HUMAN	CTDNEP1	CTD nuclear envelope phosphatase 1 OS=Homo sapiens OX=9606 GN=CTDNEP1 PE=1 SV=2	28.377	244	1.1109	0.151734	0.605751	0.990959	4	18.4355	18.0789	17.9301	18.2809
O43149	ZZEF1_HUMAN	ZZEF1	Zinc finger ZZ-type and EF-hand domain-containing protein 1 OS=Homo sapiens OX=9606 GN=ZZEF1 PE=1 SV=6	331.075	2961	1.1108	0.151605	0.143392	0.990959	4	17.5998	17.479	17.3649	17.4107
Q86WX3	AROS_HUMAN	RPS19BP1	Active regulator of SIRT1 OS=Homo sapiens OX=9606 GN=RPS19BP1 PE=1 SV=1	15.434	136	1.1106	0.151338	0.470964	0.990959	4	18.6437	18.5946	18.6377	18.2979
Q6ZNW5	GDPP1_HUMAN	GDPGP1	GDP-D-glucose phosphorylase 1 OS=Homo sapiens OX=9606 GN=GDPGP1 PE=1 SV=2	42.362	385	1.11059	0.151326	0.45014	0.990959	4	18.0043	18.0642	17.7232	18.0427
Q8IWL3	HSC20_HUMAN	HSCB	Iron-sulfur cluster co-chaperone protein HscB OS=Homo sapiens OX=9606 GN=HSCB PE=1 SV=3	27.422	235	1.11053	0.151245	0.153998	0.990959	4	18.5806	18.6837	18.4375	18.5243
Q14186	TFDP1_HUMAN	TFDP1	Transcription factor Dp-1 OS=Homo sapiens OX=9606 GN=TFDP1 PE=1 SV=1	45.07	410	1.11051	0.151226	0.0557302	0.990959	4	19.8903	19.9451	19.7412	19.7918
Q01658	NC2B_HUMAN	DR1	Protein Dr1 OS=Homo sapiens OX=9606 GN=DR1 PE=1 SV=1	19.444	176	1.1104	0.15108	0.663441	0.990959	4	21.6002	21.8637	21.3126	21.8491
Q9Y2X7	GIT1_HUMAN	GIT1	ARF GTPase-activating protein GIT1 OS=Homo sapiens OX=9606 GN=GIT1 PE=1 SV=2	84.341	761	1.11036	0.151028	0.0175134	0.990959	4	18.5837	18.5872	18.4546	18.4142
Q86UV5	UBP48_HUMAN	USP48	Ubiquitin carboxyl-terminal hydrolase 48 OS=Homo sapiens OX=9606 GN=USP48 PE=1 SV=1	119.032	1035	1.11025	0.150887	0.245024	0.990959	4	19.3152	19.2288	19.0391	19.2031
Q8WWI5	CTL1_HUMAN	SLC44A1	Choline transporter-like protein 1 OS=Homo sapiens OX=9606 GN=SLC44A1 PE=1 SV=1	73.302	657	1.11018	0.150789	0.426177	0.990959	4	19.2093	19.508	19.237	19.1788
Q96BJ8	ELMO3_HUMAN	ELMO3	Engulfment and cell motility protein 3 OS=Homo sapiens OX=9606 GN=ELMO3 PE=1 SV=3	81.467	720	1.1101	0.150689	0.0788121	0.990959	4	18.9658	18.893	18.8052	18.7522
Q13490	BIRC2_HUMAN	BIRC2	Baculoviral IAP repeat-containing protein 2 OS=Homo sapiens OX=9606 GN=BIRC2 PE=1 SV=2	69.9	618	1.11007	0.150646	0.357955	0.990959	4	18.6633	18.4097	18.3759	18.3958
Q6NXT4	ZNT6_HUMAN	SLC30A6	Zinc transporter 6 OS=Homo sapiens OX=9606 GN=SLC30A6 PE=1 SV=2	51.116	461	1.11006	0.150636	0.586108	0.990959	4	18.4107	18.5044	18.0774	18.5365
Q96JH7	VCIP1_HUMAN	VCPIP1	Deubiquitinating protein VCPIP1 OS=Homo sapiens OX=9606 GN=VCPIP1 PE=1 SV=2	134.321	1222	1.11002	0.150591	0.0613256	0.990959	4	18.3035	18.3457	18.2069	18.141
Q9BTV6	DPH7_HUMAN	DPH7	Diphthine methyltransferase OS=Homo sapiens OX=9606 GN=DPH7 PE=1 SV=2	50.575	452	1.10972	0.150191	0.63932	0.990959	4	17.1022	16.7385	16.9759	16.5643
Q14674	ESPL1_HUMAN	ESPL1	Separin OS=Homo sapiens OX=9606 GN=ESPL1 PE=1 SV=3	233.175	2120	1.10967	0.150128	0.224822	0.990959	4	18.4371	18.3442	18.3135	18.1676
Q9UHL9	GT2D1_HUMAN	GTF2IRD1	General transcription factor II-I repeat domain-containing protein 1 OS=Homo sapiens OX=9606 GN=GTF2IRD1 PE=1 SV=1	106.057	959	1.10964	0.150096	0.777076	0.993107	4	18.2503	18.1457	17.5868	18.5091
Q9BUR5	MIC26_HUMAN	APOO	MICOS complex subunit MIC26 OS=Homo sapiens OX=9606 GN=APOO PE=1 SV=1	22.285	198	1.10957	0.149998	0.0511168	0.990959	4	21.539	21.4879	21.3391	21.3878
P18074	ERCC2_HUMAN	ERCC2	General transcription and DNA repair factor IIH helicase subunit XPD OS=Homo sapiens OX=9606 GN=ERCC2 PE=1 SV=1	86.909	760	1.10943	0.149824	0.238351	0.990959	4	18.1285	18.1013	17.876	18.0542
Q9NYG2	ZDHC3_HUMAN	ZDHHC3	Palmitoyltransferase ZDHHC3 OS=Homo sapiens OX=9606 GN=ZDHHC3 PE=1 SV=2	34.17	299	1.10941	0.149791	0.143703	0.990959	4	18.3839	18.2926	18.1437	18.2332
P29350	PTN6_HUMAN	PTPN6	Tyrosine-protein phosphatase non-receptor type 6 OS=Homo sapiens OX=9606 GN=PTPN6 PE=1 SV=1	67.561	595	1.10919	0.149502	0.188429	0.990959	4	17.7684	17.7568	17.5372	17.689
O00148	DX39A_HUMAN	DDX39A	ATP-dependent RNA helicase DDX39A OS=Homo sapiens OX=9606 GN=DDX39A PE=1 SV=2	49.13	427	1.1091	0.149387	0.444737	0.990959	4	25.1626	25.3313	24.9637	25.2314
P37268	FDFT_HUMAN	FDFT1	Squalene synthase OS=Homo sapiens OX=9606 GN=FDFT1 PE=1 SV=1	48.115	417	1.10891	0.149138	0.522915	0.990959	4	20.6669	20.7083	20.3453	20.7316
Q9P2J9	PDP2_HUMAN	PDP2	[Pyruvate dehydrogenase [acetyl-transferring]]-phosphatase 2, mitochondrial OS=Homo sapiens OX=9606 GN=PDP2 PE=2 SV=2	59.978	529	1.10857	0.148697	0.363466	0.990959	4	16.56	16.454	16.4741	16.2425
Q9P270	SLAI2_HUMAN	SLAIN2	SLAIN motif-containing protein 2 OS=Homo sapiens OX=9606 GN=SLAIN2 PE=1 SV=2	62.543	581	1.10851	0.148626	0.00375702	0.857283	4	20.6839	20.6855	20.5452	20.527
Q5XUX1	FBXW9_HUMAN	FBXW9	F-box/WD repeat-containing protein 9 OS=Homo sapiens OX=9606 GN=FBXW9 PE=1 SV=3	50.76	458	1.10849	0.148593	0.722009	0.990959	4	16.6555	16.713	16.8976	16.1738
P78362	SRPK2_HUMAN	SRPK2	SRSF protein kinase 2 OS=Homo sapiens OX=9606 GN=SRPK2 PE=1 SV=3	77.527	688	1.10833	0.148391	0.488322	0.990959	4	19.8607	19.9012	19.5575	19.9076
Q9Y3X0	CCDC9_HUMAN	CCDC9	Coiled-coil domain-containing protein 9 OS=Homo sapiens OX=9606 GN=CCDC9 PE=1 SV=1	59.703	531	1.108	0.147956	0.227524	0.990959	4	19.7008	19.5651	19.5379	19.4321
P60866	RS20_HUMAN	RPS20	40S ribosomal protein S20 OS=Homo sapiens OX=9606 GN=RPS20 PE=1 SV=1	13.373	119	1.10798	0.147936	0.652741	0.990959	4	25.0661	25.4409	24.8942	25.317
P12259	FA5_HUMAN	F5	Coagulation factor V OS=Homo sapiens OX=9606 GN=F5 PE=1 SV=4	251.703	2224	1.10779	0.147689	0.770504	0.992261	4	17.2402	17.6011	16.8685	17.6774
P05023	AT1A1_HUMAN	ATP1A1	Sodium/potassium-transporting ATPase subunit alpha-1 OS=Homo sapiens OX=9606 GN=ATP1A1 PE=1 SV=1	112.896	1023	1.10763	0.147473	0.270908	0.990959	4	24.717	24.6993	24.4632	24.6582
Q99685	MGLL_HUMAN	MGLL	Monoglyceride lipase OS=Homo sapiens OX=9606 GN=MGLL PE=1 SV=2	33.261	303	1.10747	0.147267	0.290847	0.990959	4	20.129	19.9238	19.865	19.8933
Q13772	NCOA4_HUMAN	NCOA4	Nuclear receptor coactivator 4 OS=Homo sapiens OX=9606 GN=NCOA4 PE=1 SV=1	69.726	614	1.10744	0.14723	0.105048	0.990959	4	19.4357	19.3507	19.2162	19.2758
P57076	CF298_HUMAN	CFAP298	Cilia- and flagella-associated protein 298 OS=Homo sapiens OX=9606 GN=CFAP298 PE=1 SV=1	33.224	290	1.10744	0.147226	0.043638	0.990959	4	19.5192	19.5464	19.3568	19.4143
O14686	KMT2D_HUMAN	KMT2D	Histone-lysine N-methyltransferase 2D OS=Homo sapiens OX=9606 GN=KMT2D PE=1 SV=2	593.389	5537	1.10736	0.147122	0.105702	0.990959	4	18.0337	17.9297	17.8369	17.8324
Q9HD34	LYRM4_HUMAN	LYRM4	LYR motif-containing protein 4 OS=Homo sapiens OX=9606 GN=LYRM4 PE=1 SV=1	10.758	91	1.10734	0.147103	0.496873	0.990959	4	19.3459	19.0632	18.9481	19.1668
Q92609	TBCD5_HUMAN	TBC1D5	TBC1 domain family member 5 OS=Homo sapiens OX=9606 GN=TBC1D5 PE=1 SV=1	89.004	795	1.10716	0.146864	0.302221	0.990959	4	20.8124	20.6572	20.661	20.5148
Q96JJ7	TMX3_HUMAN	TMX3	Protein disulfide-isomerase TMX3 OS=Homo sapiens OX=9606 GN=TMX3 PE=1 SV=2	51.872	454	1.10711	0.146804	0.2923	0.990959	4	20.3317	20.1246	20.0862	20.0765
Q8IV31	TM139_HUMAN	TMEM139	Transmembrane protein 139 OS=Homo sapiens OX=9606 GN=TMEM139 PE=1 SV=1	23.729	216	1.10704	0.146712	0.434906	0.990959	4	15.2912	15.0216	14.9406	15.0788
O00189	AP4M1_HUMAN	AP4M1	AP-4 complex subunit mu-1 OS=Homo sapiens OX=9606 GN=AP4M1 PE=1 SV=2	49.977	453	1.10672	0.146287	0.586058	0.990959	4	18.4397	18.7085	18.2443	18.6113
Q8WUY1	THEM6_HUMAN	THEM6	Protein THEM6 OS=Homo sapiens OX=9606 GN=THEM6 PE=1 SV=2	23.865	208	1.10664	0.146181	0.0355607	0.990959	4	20.8981	20.9461	20.7609	20.791
Q9BZ95	NSD3_HUMAN	NSD3	Histone-lysine N-methyltransferase NSD3 OS=Homo sapiens OX=9606 GN=NSD3 PE=1 SV=1	161.613	1437	1.10637	0.14583	0.402299	0.990959	4	18.0412	17.8357	17.7	17.8852
P10809	CH60_HUMAN	HSPD1	60 kDa heat shock protein, mitochondrial OS=Homo sapiens OX=9606 GN=HSPD1 PE=1 SV=2	61.055	573	1.10629	0.145725	0.516494	0.990959	4	26.1609	26.0886	25.796	26.162
Q14781	CBX2_HUMAN	CBX2	Chromobox protein homolog 2 OS=Homo sapiens OX=9606 GN=CBX2 PE=1 SV=2	56.081	532	1.10624	0.145666	0.506437	0.990959	4	17.2963	16.9337	16.9776	16.961
Q8IV50	LYSM2_HUMAN	LYSMD2	LysM and putative peptidoglycan-binding domain-containing protein 2 OS=Homo sapiens OX=9606 GN=LYSMD2 PE=1 SV=1	23.463	215	1.10613	0.145518	0.529323	0.990959	4	18.8988	18.6773	18.4846	18.8005
Q05932	FOLC_HUMAN	FPGS	Folylpolyglutamate synthase, mitochondrial OS=Homo sapiens OX=9606 GN=FPGS PE=1 SV=3	64.609	587	1.10612	0.14551	0.358303	0.990959	4	20.7927	20.7783	20.5172	20.7627
Q12905	ILF2_HUMAN	ILF2	Interleukin enhancer-binding factor 2 OS=Homo sapiens OX=9606 GN=ILF2 PE=1 SV=2	43.062	390	1.10609	0.145469	0.369543	0.990959	4	24.1321	24.2524	23.9353	24.1582
Q8N5B7	CERS5_HUMAN	CERS5	Ceramide synthase 5 OS=Homo sapiens OX=9606 GN=CERS5 PE=1 SV=1	45.752	392	1.10604	0.145398	0.744227	0.990959	4	16.8494	16.6239	16.9631	16.2193
Q0JRZ9	FCHO2_HUMAN	FCHO2	F-BAR domain only protein 2 OS=Homo sapiens OX=9606 GN=FCHO2 PE=1 SV=2	88.924	810	1.1059	0.145218	0.0763398	0.990959	4	19.6516	19.6151	19.5266	19.4496
Q9BW66	CINP_HUMAN	CINP	Cyclin-dependent kinase 2-interacting protein OS=Homo sapiens OX=9606 GN=CINP PE=1 SV=1	24.324	212	1.10589	0.145206	0.578311	0.990959	4	17.8633	17.6277	17.787	17.4136
P46937	YAP1_HUMAN	YAP1	Transcriptional coactivator YAP1 OS=Homo sapiens OX=9606 GN=YAP1 PE=1 SV=2	54.462	504	1.10578	0.14506	0.0424753	0.990959	4	22.843	22.7969	22.6543	22.6955
Q9ULV4	COR1C_HUMAN	CORO1C	Coronin-1C OS=Homo sapiens OX=9606 GN=CORO1C PE=1 SV=1	53.249	474	1.10569	0.144948	0.111698	0.990959	4	21.5232	21.6247	21.4442	21.4138
Q7Z4G4	TRM11_HUMAN	TRMT11	tRNA (guanine(10)-N2)-methyltransferase homolog OS=Homo sapiens OX=9606 GN=TRMT11 PE=1 SV=1	53.421	463	1.10548	0.14467	0.301069	0.990959	4	19.3055	19.2839	19.0459	19.2542
Q9NP73	ALG13_HUMAN	ALG13	Putative bifunctional UDP-N-acetylglucosamine transferase and deubiquitinase ALG13 OS=Homo sapiens OX=9606 GN=ALG13 PE=1 SV=2	126.056	1137	1.10525	0.144378	0.395319	0.990959	4	18.9276	18.9765	18.6754	18.9399
Q9UPP1	PHF8_HUMAN	PHF8	Histone lysine demethylase PHF8 OS=Homo sapiens OX=9606 GN=PHF8 PE=1 SV=3	117.864	1060	1.10504	0.1441	0.18859	0.990959	4	18.8923	18.7543	18.6543	18.7041
Q9NX18	SDHF2_HUMAN	SDHAF2	Succinate dehydrogenase assembly factor 2, mitochondrial OS=Homo sapiens OX=9606 GN=SDHAF2 PE=1 SV=1	19.599	166	1.10499	0.144036	0.613077	0.990959	4	19.4734	19.9537	19.6048	19.5342
O95633	FSTL3_HUMAN	FSTL3	Follistatin-related protein 3 OS=Homo sapiens OX=9606 GN=FSTL3 PE=1 SV=1	27.663	263	1.10486	0.143857	0.558822	0.990959	4	19.4507	19.8428	19.4367	19.5691
P56181	NDUV3_HUMAN	NDUFV3	NADH dehydrogenase [ubiquinone] flavoprotein 3, mitochondrial OS=Homo sapiens OX=9606 GN=NDUFV3 PE=1 SV=2	11.941	108	1.10482	0.143816	0.66222	0.990959	4	18.2666	17.7966	18.0462	17.7295
P55196	AFAD_HUMAN	AFDN	Afadin OS=Homo sapiens OX=9606 GN=AFDN PE=1 SV=3	206.804	1824	1.10451	0.143403	0.619927	0.990959	4	16.4308	16.1789	16.3736	15.9492
Q9BXB1	LGR4_HUMAN	LGR4	Leucine-rich repeat-containing G-protein coupled receptor 4 OS=Homo sapiens OX=9606 GN=LGR4 PE=1 SV=2	104.475	951	1.10449	0.143383	0.272069	0.990959	4	18.3567	18.5461	18.3204	18.2957
Q9Y6D5	BIG2_HUMAN	ARFGEF2	Brefeldin A-inhibited guanine nucleotide-exchange protein 2 OS=Homo sapiens OX=9606 GN=ARFGEF2 PE=1 SV=3	202.038	1785	1.10445	0.143323	0.0943401	0.990959	4	19.3022	19.2297	19.092	19.1532
Q9BXI9	C1QT6_HUMAN	C1QTNF6	Complement C1q tumor necrosis factor-related protein 6 OS=Homo sapiens OX=9606 GN=C1QTNF6 PE=1 SV=4	30.861	278	1.10441	0.143279	0.380265	0.990959	4	17.8068	18.0198	17.6985	17.8415
Q9H5V9	CX056_HUMAN	CXorf56	UPF0428 protein CXorf56 OS=Homo sapiens OX=9606 GN=CXorf56 PE=1 SV=1	25.625	222	1.1041	0.142873	0.373945	0.990959	4	18.2983	18.0543	18.0643	18.0026
Q13838	DX39B_HUMAN	DDX39B	Spliceosome RNA helicase DDX39B OS=Homo sapiens OX=9606 GN=DDX39B PE=1 SV=1	48.991	428	1.10404	0.142796	0.397848	0.990959	4	23.0482	23.1763	22.8519	23.087
Q86UX6	ST32C_HUMAN	STK32C	Serine/threonine-protein kinase 32C OS=Homo sapiens OX=9606 GN=STK32C PE=1 SV=1	54.994	486	1.10402	0.142762	0.526816	0.990959	4	17.2987	16.9892	16.8945	17.1078
Q12778	FOXO1_HUMAN	FOXO1	Forkhead box protein O1 OS=Homo sapiens OX=9606 GN=FOXO1 PE=1 SV=2	69.662	655	1.10394	0.14266	0.115725	0.990959	4	17.6414	17.7084	17.5737	17.4908
Q14680	MELK_HUMAN	MELK	Maternal embryonic leucine zipper kinase OS=Homo sapiens OX=9606 GN=MELK PE=1 SV=3	74.642	651	1.10387	0.142573	0.711834	0.990959	4	15.5248	16.1826	15.6475	15.7748
Q16763	UBE2S_HUMAN	UBE2S	Ubiquitin-conjugating enzyme E2 S OS=Homo sapiens OX=9606 GN=UBE2S PE=1 SV=2	23.845	222	1.10365	0.142283	0.500526	0.990959	4	21.1305	21.243	20.8793	21.2096
Q13283	G3BP1_HUMAN	G3BP1	Ras GTPase-activating protein-binding protein 1 OS=Homo sapiens OX=9606 GN=G3BP1 PE=1 SV=1	52.164	466	1.1036	0.142216	0.209746	0.990959	4	22.8981	23.0209	22.7693	22.8653
P27540	ARNT_HUMAN	ARNT	Aryl hydrocarbon receptor nuclear translocator OS=Homo sapiens OX=9606 GN=ARNT PE=1 SV=1	86.637	789	1.10351	0.142093	0.437825	0.990959	4	18.4805	18.5534	18.5181	18.2316
Q16610	ECM1_HUMAN	ECM1	Extracellular matrix protein 1 OS=Homo sapiens OX=9606 GN=ECM1 PE=1 SV=2	60.674	540	1.10339	0.141948	0.44614	0.990959	4	20.2384	20.4983	20.1497	20.3031
P51828	ADCY7_HUMAN	ADCY7	Adenylate cyclase type 7 OS=Homo sapiens OX=9606 GN=ADCY7 PE=1 SV=1	120.308	1080	1.10323	0.14173	0.642294	0.990959	4	15.3097	15.4322	15.4836	14.9749
Q6ZSJ8	CA122_HUMAN	C1orf122	Uncharacterized protein C1orf122 OS=Homo sapiens OX=9606 GN=C1orf122 PE=4 SV=2	11.471	110	1.1031	0.141569	0.14819	0.990959	4	20.7516	20.6508	20.5242	20.595
Q92685	ALG3_HUMAN	ALG3	Dol-P-Man:Man(5)GlcNAc(2)-PP-Dol alpha-1,3-mannosyltransferase OS=Homo sapiens OX=9606 GN=ALG3 PE=1 SV=1	50.126	438	1.10304	0.141488	0.616438	0.990959	4	19.8508	20.0329	19.5773	20.0234
Q15645	PCH2_HUMAN	TRIP13	Pachytene checkpoint protein 2 homolog OS=Homo sapiens OX=9606 GN=TRIP13 PE=1 SV=2	48.551	432	1.10304	0.141483	0.0880983	0.990959	4	21.9063	21.9544	21.7508	21.8269
P22102	PUR2_HUMAN	GART	Trifunctional purine biosynthetic protein adenosine-3 OS=Homo sapiens OX=9606 GN=GART PE=1 SV=1	107.767	1010	1.10297	0.141399	0.435579	0.990959	4	23.5882	23.5346	23.2763	23.5638
P21359	NF1_HUMAN	NF1	Neurofibromin OS=Homo sapiens OX=9606 GN=NF1 PE=1 SV=2	319.372	2839	1.10291	0.141317	0.421537	0.990959	4	18.0919	17.8193	17.8501	17.7784
Q99766	ATP5S_HUMAN	DMAC2L	ATP synthase subunit s, mitochondrial OS=Homo sapiens OX=9606 GN=DMAC2L PE=1 SV=3	24.866	215	1.10257	0.140867	0.302972	0.990959	4	18.245	18.0828	17.9604	18.0857
Q14687	GSE1_HUMAN	GSE1	Genetic suppressor element 1 OS=Homo sapiens OX=9606 GN=GSE1 PE=1 SV=3	136.164	1217	1.10255	0.140848	0.672759	0.990959	4	18.1013	18.2237	18.3026	17.7406
Q9GZP8	IMUP_HUMAN	IMUP	Immortalization up-regulated protein OS=Homo sapiens OX=9606 GN=IMUP PE=1 SV=1	10.897	106	1.10255	0.140842	0.616303	0.990959	4	22.5627	22.5808	22.1914	22.6704
Q9H0K1	SIK2_HUMAN	SIK2	Serine/threonine-protein kinase SIK2 OS=Homo sapiens OX=9606 GN=SIK2 PE=1 SV=1	103.915	926	1.10254	0.140833	0.223577	0.990959	4	18.6043	18.5015	18.3497	18.4744
Q9ULP9	TBC24_HUMAN	TBC1D24	TBC1 domain family member 24 OS=Homo sapiens OX=9606 GN=TBC1D24 PE=1 SV=2	62.92	559	1.10252	0.140811	0.451286	0.990959	4	18.8362	18.823	18.5372	18.8403
P07195	LDHB_HUMAN	LDHB	L-lactate dehydrogenase B chain OS=Homo sapiens OX=9606 GN=LDHB PE=1 SV=2	36.638	334	1.1025	0.140784	0.404212	0.990959	4	26.4111	26.2935	26.0909	26.3322
Q9Y5Y2	NUBP2_HUMAN	NUBP2	Cytosolic Fe-S cluster assembly factor NUBP2 OS=Homo sapiens OX=9606 GN=NUBP2 PE=1 SV=1	28.825	271	1.10244	0.140701	0.473808	0.990959	4	20.8412	20.8375	20.5379	20.8594
O94864	ST65G_HUMAN	SUPT7L	STAGA complex 65 subunit gamma OS=Homo sapiens OX=9606 GN=SUPT7L PE=1 SV=1	46.193	414	1.10232	0.140549	0.29413	0.990959	4	19.7167	19.8006	19.5276	19.7086
Q8WUA4	TF3C2_HUMAN	GTF3C2	General transcription factor 3C polypeptide 2 OS=Homo sapiens OX=9606 GN=GTF3C2 PE=1 SV=2	100.68	911	1.10225	0.140451	0.159016	0.990959	4	19.7359	19.7475	19.5376	19.6649
Q96M27	PRRC1_HUMAN	PRRC1	Protein PRRC1 OS=Homo sapiens OX=9606 GN=PRRC1 PE=1 SV=1	46.701	445	1.10221	0.140394	0.247724	0.990959	4	20.8357	21.0006	20.7501	20.8055
O43837	IDH3B_HUMAN	IDH3B	Isocitrate dehydrogenase [NAD] subunit beta, mitochondrial OS=Homo sapiens OX=9606 GN=IDH3B PE=1 SV=2	42.184	385	1.10216	0.140338	0.471253	0.990959	4	21.6634	21.6362	21.3507	21.6682
Q8WYA6	CTBL1_HUMAN	CTNNBL1	Beta-catenin-like protein 1 OS=Homo sapiens OX=9606 GN=CTNNBL1 PE=1 SV=1	65.173	563	1.10206	0.140207	0.23104	0.990959	4	21.2604	21.3772	21.1205	21.2368
Q15366	PCBP2_HUMAN	PCBP2	Poly(rC)-binding protein 2 OS=Homo sapiens OX=9606 GN=PCBP2 PE=1 SV=1	38.58	365	1.1018	0.139865	0.392638	0.990959	4	24.8099	25.0179	24.6971	24.851
Q9BTC8	MTA3_HUMAN	MTA3	Metastasis-associated protein MTA3 OS=Homo sapiens OX=9606 GN=MTA3 PE=1 SV=2	67.504	594	1.10178	0.139839	0.282419	0.990959	4	20.3333	20.2785	20.074	20.258
Q8TCU4	ALMS1_HUMAN	ALMS1	Alstrom syndrome protein 1 OS=Homo sapiens OX=9606 GN=ALMS1 PE=1 SV=4	461.062	4168	1.10173	0.139775	0.437365	0.990959	4	19.7805	19.9582	19.6147	19.8444
Q8WV60	PTCD2_HUMAN	PTCD2	Pentatricopeptide repeat-containing protein 2, mitochondrial OS=Homo sapiens OX=9606 GN=PTCD2 PE=1 SV=3	43.968	388	1.10172	0.139761	0.259051	0.990959	4	19.3597	19.5132	19.2505	19.3428
Q9GZZ9	UBA5_HUMAN	UBA5	Ubiquitin-like modifier-activating enzyme 5 OS=Homo sapiens OX=9606 GN=UBA5 PE=1 SV=1	44.863	404	1.10168	0.139699	0.253038	0.990959	4	20.4564	20.3652	20.1959	20.3463
Q12981	SEC20_HUMAN	BNIP1	Vesicle transport protein SEC20 OS=Homo sapiens OX=9606 GN=BNIP1 PE=1 SV=3	26.132	228	1.10164	0.13965	0.44265	0.990959	4	20.788	20.6799	20.4575	20.7311
O95714	HERC2_HUMAN	HERC2	E3 ubiquitin-protein ligase HERC2 OS=Homo sapiens OX=9606 GN=HERC2 PE=1 SV=2	527.228	4834	1.10159	0.139589	0.204337	0.990959	4	18.202	18.0658	18.026	17.9625
P28347	TEAD1_HUMAN	TEAD1	Transcriptional enhancer factor TEF-1 OS=Homo sapiens OX=9606 GN=TEAD1 PE=1 SV=2	47.946	426	1.10156	0.139547	0.0981953	0.990959	4	19.6522	19.7106	19.5047	19.579
Q8NBP0	TTC13_HUMAN	TTC13	Tetratricopeptide repeat protein 13 OS=Homo sapiens OX=9606 GN=TTC13 PE=2 SV=3	96.813	860	1.10139	0.139323	0.598103	0.990959	4	17.6808	17.3001	17.4701	17.2321
O75665	OFD1_HUMAN	OFD1	Oral-facial-digital syndrome 1 protein OS=Homo sapiens OX=9606 GN=OFD1 PE=1 SV=1	116.671	1012	1.10138	0.139317	0.459667	0.990959	4	17.5093	17.2084	17.1894	17.2497
P11441	UBL4A_HUMAN	UBL4A	Ubiquitin-like protein 4A OS=Homo sapiens OX=9606 GN=UBL4A PE=1 SV=1	17.777	157	1.10137	0.139306	0.347652	0.990959	4	20.7154	20.5101	20.4228	20.5241
Q9NZ32	ARP10_HUMAN	ACTR10	Actin-related protein 10 OS=Homo sapiens OX=9606 GN=ACTR10 PE=1 SV=1	46.307	417	1.10112	0.138971	0.19145	0.990959	4	19.4535	19.4589	19.3887	19.2457
Q9Y2Y0	AR2BP_HUMAN	ARL2BP	ADP-ribosylation factor-like protein 2-binding protein OS=Homo sapiens OX=9606 GN=ARL2BP PE=1 SV=1	18.822	163	1.10108	0.138921	0.242219	0.990959	4	19.5089	19.3411	19.2752	19.297
Q7RTP0	NIPA1_HUMAN	NIPA1	Magnesium transporter NIPA1 OS=Homo sapiens OX=9606 GN=NIPA1 PE=1 SV=1	34.562	329	1.101	0.138809	0.54656	0.990959	4	18.2345	18.4924	18.3681	18.0812
Q6GMV2	SMYD5_HUMAN	SMYD5	SET and MYND domain-containing protein 5 OS=Homo sapiens OX=9606 GN=SMYD5 PE=1 SV=2	47.341	418	1.10095	0.138753	0.424251	0.990959	4	19.2736	19.4281	19.0961	19.328
Q9Y3T6	R3HC1_HUMAN	R3HCC1	R3H and coiled-coil domain-containing protein 1 OS=Homo sapiens OX=9606 GN=R3HCC1 PE=1 SV=3	49.092	440	1.10073	0.138463	0.677241	0.990959	4	16.9296	16.6303	16.3965	16.8865
Q16594	TAF9_HUMAN	TAF9	Transcription initiation factor TFIID subunit 9 OS=Homo sapiens OX=9606 GN=TAF9 PE=1 SV=1	28.974	264	1.10065	0.138358	7.77288e-05	0.146325	4	19.0144	19.0121	18.8752	18.8745
Q92574	TSC1_HUMAN	TSC1	Hamartin OS=Homo sapiens OX=9606 GN=TSC1 PE=1 SV=2	129.767	1164	1.10051	0.138173	0.270966	0.990959	4	17.5892	17.4863	17.3236	17.4755
Q92979	NEP1_HUMAN	EMG1	Ribosomal RNA small subunit methyltransferase NEP1 OS=Homo sapiens OX=9606 GN=EMG1 PE=1 SV=4	26.72	244	1.10041	0.138038	0.406183	0.990959	4	21.7914	21.8811	21.5738	21.8226
O96017	CHK2_HUMAN	CHEK2	Serine/threonine-protein kinase Chk2 OS=Homo sapiens OX=9606 GN=CHEK2 PE=1 SV=1	60.915	543	1.1004	0.138031	0.240624	0.990959	4	19.2354	19.0743	19.0395	18.9942
Q53H96	P5CR3_HUMAN	PYCR3	Pyrroline-5-carboxylate reductase 3 OS=Homo sapiens OX=9606 GN=PYCR3 PE=1 SV=3	28.663	274	1.10037	0.137993	0.217777	0.990959	4	19.6445	19.6339	19.5787	19.4237
Q96T21	SEBP2_HUMAN	SECISBP2	Selenocysteine insertion sequence-binding protein 2 OS=Homo sapiens OX=9606 GN=SECISBP2 PE=1 SV=2	95.462	854	1.10031	0.137909	0.663771	0.990959	4	16.6402	16.2777	16.5254	16.1167
P10606	COX5B_HUMAN	COX5B	Cytochrome c oxidase subunit 5B, mitochondrial OS=Homo sapiens OX=9606 GN=COX5B PE=1 SV=2	13.696	129	1.10026	0.137845	0.6732	0.990959	4	24.6294	24.6864	24.2396	24.8005
Q9NV96	CC50A_HUMAN	TMEM30A	Cell cycle control protein 50A OS=Homo sapiens OX=9606 GN=TMEM30A PE=1 SV=1	40.684	361	1.10015	0.137702	0.211217	0.990959	4	19.7016	19.7635	19.5256	19.6642
Q9P2S5	WRP73_HUMAN	WRAP73	WD repeat-containing protein WRAP73 OS=Homo sapiens OX=9606 GN=WRAP73 PE=1 SV=1	51.588	460	1.10014	0.137692	0.54738	0.990959	4	18.114	17.7404	17.8329	17.7461
Q86U28	ISCA2_HUMAN	ISCA2	Iron-sulfur cluster assembly 2 homolog, mitochondrial OS=Homo sapiens OX=9606 GN=ISCA2 PE=1 SV=2	16.476	154	1.10013	0.13767	0.641742	0.990959	4	18.8252	18.8788	18.4621	18.9666
Q13444	ADA15_HUMAN	ADAM15	Disintegrin and metalloproteinase domain-containing protein 15 OS=Homo sapiens OX=9606 GN=ADAM15 PE=1 SV=4	92.959	863	1.10011	0.137643	0.400453	0.990959	4	19.0567	19.3165	19.0523	19.0457
Q96AY4	TTC28_HUMAN	TTC28	Tetratricopeptide repeat protein 28 OS=Homo sapiens OX=9606 GN=TTC28 PE=1 SV=4	270.884	2481	1.10006	0.137587	0.0772155	0.990959	4	16.8256	16.9061	16.7336	16.7229
Q13438	OS9_HUMAN	OS9	Protein OS-9 OS=Homo sapiens OX=9606 GN=OS9 PE=1 SV=1	75.562	667	1.10006	0.13758	0.446171	0.990959	4	18.8851	18.8068	18.5674	18.8493
Q8NCD3	HJURP_HUMAN	HJURP	Holliday junction recognition protein OS=Homo sapiens OX=9606 GN=HJURP PE=1 SV=2	83.539	748	1.10002	0.137523	0.375268	0.990959	4	17.6914	17.4485	17.4375	17.4274
Q9NWU1	OXSM_HUMAN	OXSM	3-oxoacyl-[acyl-carrier-protein] synthase, mitochondrial OS=Homo sapiens OX=9606 GN=OXSM PE=1 SV=1	48.843	459	1.09998	0.137477	0.346112	0.990959	4	18.1608	18.0917	17.8817	18.0958
Q99828	CIB1_HUMAN	CIB1	Calcium and integrin-binding protein 1 OS=Homo sapiens OX=9606 GN=CIB1 PE=1 SV=4	21.703	191	1.09991	0.137381	0.0913383	0.990959	4	19.2414	19.2107	19.0468	19.1306
P42684	ABL2_HUMAN	ABL2	Tyrosine-protein kinase ABL2 OS=Homo sapiens OX=9606 GN=ABL2 PE=1 SV=1	128.343	1182	1.09943	0.13675	0.049756	0.990959	4	20.0103	19.9978	19.8362	19.8984
Q9Y3C4	TPRKB_HUMAN	TPRKB	EKC/KEOPS complex subunit TPRKB OS=Homo sapiens OX=9606 GN=TPRKB PE=1 SV=1	19.661	175	1.09931	0.136596	0.671867	0.990959	4	19.1836	18.9136	18.6689	19.1551
O96011	PX11B_HUMAN	PEX11B	Peroxisomal membrane protein 11B OS=Homo sapiens OX=9606 GN=PEX11B PE=1 SV=1	28.431	259	1.09927	0.13654	0.359923	0.990959	4	19.9417	20.1721	19.9332	19.9075
O95807	TM50A_HUMAN	TMEM50A	Transmembrane protein 50A OS=Homo sapiens OX=9606 GN=TMEM50A PE=1 SV=1	17.4	157	1.0992	0.136457	0.531078	0.990959	4	18.0554	18.3009	17.9077	18.1758
Q9NR56	MBNL1_HUMAN	MBNL1	Muscleblind-like protein 1 OS=Homo sapiens OX=9606 GN=MBNL1 PE=1 SV=2	41.817	388	1.09919	0.136438	0.167431	0.990959	4	20.7469	20.7049	20.5288	20.6501
Q8NFG4	FLCN_HUMAN	FLCN	Folliculin OS=Homo sapiens OX=9606 GN=FLCN PE=1 SV=1	64.473	579	1.09912	0.136348	0.636714	0.990959	4	16.7065	16.6797	16.8036	16.3098
Q86T03	PP4P1_HUMAN	PIP4P1	Type 1 phosphatidylinositol 4,5-bisphosphate 4-phosphatase OS=Homo sapiens OX=9606 GN=PIP4P1 PE=1 SV=1	29.47	277	1.09909	0.136309	0.532035	0.990959	4	18.7854	18.9759	18.5893	18.8995
Q5NDL2	EOGT_HUMAN	EOGT	EGF domain-specific O-linked N-acetylglucosamine transferase OS=Homo sapiens OX=9606 GN=EOGT PE=1 SV=1	62.011	527	1.09897	0.136147	0.187171	0.990959	4	17.7645	17.662	17.6233	17.5309
Q96GM8	TOE1_HUMAN	TOE1	Target of EGR1 protein 1 OS=Homo sapiens OX=9606 GN=TOE1 PE=1 SV=1	56.548	510	1.09854	0.135588	0.407534	0.990959	4	21.1849	21.3543	21.0349	21.2331
O00311	CDC7_HUMAN	CDC7	Cell division cycle 7-related protein kinase OS=Homo sapiens OX=9606 GN=CDC7 PE=1 SV=1	63.888	574	1.09847	0.135492	0.67739	0.990959	4	17.3322	17.441	16.9753	17.5269
Q15370	ELOB_HUMAN	ELOB	Elongin-B OS=Homo sapiens OX=9606 GN=ELOB PE=1 SV=1	13.133	118	1.09841	0.135416	0.221485	0.990959	4	23.7079	23.8481	23.6102	23.6749
O15234	CASC3_HUMAN	CASC3	Protein CASC3 OS=Homo sapiens OX=9606 GN=CASC3 PE=1 SV=2	76.278	703	1.09837	0.135362	0.0352175	0.990959	4	17.9381	17.9377	17.8287	17.7765
Q9HAV0	GBB4_HUMAN	GNB4	Guanine nucleotide-binding protein subunit beta-4 OS=Homo sapiens OX=9606 GN=GNB4 PE=1 SV=3	37.567	340	1.09835	0.135343	0.682817	0.990959	4	19.6541	20.0138	19.4761	19.9212
Q8IVU3	HERC6_HUMAN	HERC6	Probable E3 ubiquitin-protein ligase HERC6 OS=Homo sapiens OX=9606 GN=HERC6 PE=1 SV=2	115.126	1022	1.09834	0.13532	0.450602	0.990959	4	18.0257	17.7565	17.8111	17.7004
Q86XT9	TM219_HUMAN	TMEM219	Insulin-like growth factor-binding protein 3 receptor OS=Homo sapiens OX=9606 GN=TMEM219 PE=1 SV=1	25.724	240	1.09829	0.135258	0.810216	0.993107	4	18.9286	18.1529	18.0983	18.7128
P02647	APOA1_HUMAN	APOA1	Apolipoprotein A-I OS=Homo sapiens OX=9606 GN=APOA1 PE=1 SV=1	30.778	267	1.0982	0.13514	0.786693	0.993107	4	17.9464	18.3383	17.6158	18.3986
Q5W0B1	OBI1_HUMAN	OBI1	ORC ubiquitin ligase 1 OS=Homo sapiens OX=9606 GN=OBI1 PE=1 SV=1	81.116	726	1.09817	0.135108	0.452397	0.990959	4	16.7175	16.9987	16.7621	16.6839
Q03111	ENL_HUMAN	MLLT1	Protein ENL OS=Homo sapiens OX=9606 GN=MLLT1 PE=1 SV=2	62.056	559	1.09782	0.13464	0.164736	0.990959	4	19.7489	19.6254	19.563	19.542
O43683	BUB1_HUMAN	BUB1	Mitotic checkpoint serine/threonine-protein kinase BUB1 OS=Homo sapiens OX=9606 GN=BUB1 PE=1 SV=1	122.375	1085	1.09778	0.134593	0.377421	0.990959	4	18.5018	18.4786	18.4746	18.2365
Q6UXN9	WDR82_HUMAN	WDR82	WD repeat-containing protein 82 OS=Homo sapiens OX=9606 GN=WDR82 PE=1 SV=1	35.079	313	1.09774	0.134532	0.113527	0.990959	4	21.1135	21.0164	20.92	20.9409
Q9UBS8	RNF14_HUMAN	RNF14	E3 ubiquitin-protein ligase RNF14 OS=Homo sapiens OX=9606 GN=RNF14 PE=1 SV=1	53.837	474	1.09753	0.13426	0.590677	0.990959	4	18.3575	18.5399	18.1235	18.5054
Q9UGH3	S23A2_HUMAN	SLC23A2	Solute carrier family 23 member 2 OS=Homo sapiens OX=9606 GN=SLC23A2 PE=1 SV=1	70.337	650	1.09733	0.133995	0.808658	0.993107	4	14.4714	15.367	14.5963	14.9741
P42695	CNDD3_HUMAN	NCAPD3	Condensin-2 complex subunit D3 OS=Homo sapiens OX=9606 GN=NCAPD3 PE=1 SV=2	168.891	1498	1.09694	0.133491	0.178269	0.990959	4	19.8845	19.7881	19.6585	19.7471
P08572	CO4A2_HUMAN	COL4A2	Collagen alpha-2(IV) chain OS=Homo sapiens OX=9606 GN=COL4A2 PE=1 SV=4	167.553	1712	1.09683	0.13334	0.452073	0.990959	4	20.175	19.8872	19.8934	19.9022
P49917	DNLI4_HUMAN	LIG4	DNA ligase 4 OS=Homo sapiens OX=9606 GN=LIG4 PE=1 SV=2	103.971	911	1.09682	0.133323	0.634339	0.990959	4	18.9649	18.8215	18.5309	18.9889
Q9BRX8	PXL2A_HUMAN	PRXL2A	Peroxiredoxin-like 2A OS=Homo sapiens OX=9606 GN=PRXL2A PE=1 SV=3	25.764	229	1.0968	0.133303	0.404759	0.990959	4	21.4062	21.4957	21.1985	21.4368
Q6ZMB5	T184A_HUMAN	TMEM184A	Transmembrane protein 184A OS=Homo sapiens OX=9606 GN=TMEM184A PE=1 SV=1	45.777	413	1.09677	0.133257	0.504353	0.990959	4	17.0948	16.84	16.9392	16.7291
Q9Y5B6	PAXB1_HUMAN	PAXBP1	PAX3- and PAX7-binding protein 1 OS=Homo sapiens OX=9606 GN=PAXBP1 PE=1 SV=2	104.804	917	1.09658	0.133011	0.100813	0.990959	4	19.097	19.1647	18.9671	19.0286
Q7Z739	YTHD3_HUMAN	YTHDF3	YTH domain-containing family protein 3 OS=Homo sapiens OX=9606 GN=YTHDF3 PE=1 SV=1	63.861	585	1.09614	0.132427	0.451767	0.990959	4	19.9268	20.1222	19.9962	19.7878
Q9HCJ3	RAVR2_HUMAN	RAVER2	Ribonucleoprotein PTB-binding 2 OS=Homo sapiens OX=9606 GN=RAVER2 PE=1 SV=2	74.339	691	1.09595	0.13218	0.795336	0.993107	4	17.3817	18.2732	17.7294	17.6612
Q12792	TWF1_HUMAN	TWF1	Twinfilin-1 OS=Homo sapiens OX=9606 GN=TWF1 PE=1 SV=3	40.283	350	1.09594	0.132169	0.112585	0.990959	4	22.0197	21.9293	21.8245	21.8601
P63165	SUMO1_HUMAN	SUMO1	Small ubiquitin-related modifier 1 OS=Homo sapiens OX=9606 GN=SUMO1 PE=1 SV=1	11.557	101	1.09582	0.132006	0.282118	0.990959	4	20.6343	20.7505	20.491	20.6298
Q3L8U1	CHD9_HUMAN	CHD9	Chromodomain-helicase-DNA-binding protein 9 OS=Homo sapiens OX=9606 GN=CHD9 PE=1 SV=2	326.022	2897	1.09581	0.131999	0.546965	0.990959	4	18.2582	17.8917	17.9555	17.9304
Q9H7F4	T185B_HUMAN	TMEM185B	Transmembrane protein 185B OS=Homo sapiens OX=9606 GN=TMEM185B PE=1 SV=2	40.599	350	1.09562	0.131744	0.493156	0.990959	4	18.7927	18.9552	18.6062	18.8782
Q96M96	FGD4_HUMAN	FGD4	FYVE, RhoGEF and PH domain-containing protein 4 OS=Homo sapiens OX=9606 GN=FGD4 PE=1 SV=2	86.626	766	1.09521	0.131214	0.49457	0.990959	4	17.5629	17.5085	17.5606	17.2485
Q9BSJ2	GCP2_HUMAN	TUBGCP2	Gamma-tubulin complex component 2 OS=Homo sapiens OX=9606 GN=TUBGCP2 PE=1 SV=2	102.534	902	1.09492	0.130822	0.0711488	0.990959	4	20.1688	20.1838	20.0816	20.0093
Q96SB8	SMC6_HUMAN	SMC6	Structural maintenance of chromosomes protein 6 OS=Homo sapiens OX=9606 GN=SMC6 PE=1 SV=2	126.326	1091	1.09482	0.130689	0.516729	0.990959	4	18.336	18.4411	18.0989	18.4168
Q12800	TFCP2_HUMAN	TFCP2	Alpha-globin transcription factor CP2 OS=Homo sapiens OX=9606 GN=TFCP2 PE=1 SV=2	57.256	502	1.09473	0.130576	0.455852	0.990959	4	20.1821	20.2827	19.9686	20.235
Q9BYJ9	YTHD1_HUMAN	YTHDF1	YTH domain-containing family protein 1 OS=Homo sapiens OX=9606 GN=YTHDF1 PE=1 SV=1	60.874	559	1.09472	0.130567	0.341731	0.990959	4	21.8343	21.9791	21.853	21.6993
P09669	COX6C_HUMAN	COX6C	Cytochrome c oxidase subunit 6C OS=Homo sapiens OX=9606 GN=COX6C PE=1 SV=2	8.781	75	1.09442	0.130169	0.506161	0.990959	4	23.2522	22.9818	22.8974	23.0762
P02794	FRIH_HUMAN	FTH1	Ferritin heavy chain OS=Homo sapiens OX=9606 GN=FTH1 PE=1 SV=2	21.226	183	1.09426	0.129957	0.48933	0.990959	4	22.7415	22.6421	22.4153	22.7084
Q8IXW5	RPAP2_HUMAN	RPAP2	Putative RNA polymerase II subunit B1 CTD phosphatase RPAP2 OS=Homo sapiens OX=9606 GN=RPAP2 PE=1 SV=1	69.509	612	1.0942	0.12988	0.21312	0.990959	4	18.0648	17.9232	17.8772	17.851
P26006	ITA3_HUMAN	ITGA3	Integrin alpha-3 OS=Homo sapiens OX=9606 GN=ITGA3 PE=1 SV=5	116.612	1051	1.09416	0.129818	0.511776	0.990959	4	20.5718	20.5949	20.2898	20.6172
Q96A19	C102A_HUMAN	CCDC102A	Coiled-coil domain-containing protein 102A OS=Homo sapiens OX=9606 GN=CCDC102A PE=1 SV=2	62.596	550	1.09372	0.129238	0.481787	0.990959	4	16.9891	17.0693	17.0453	16.7545
Q8N6N3	CA052_HUMAN	C1orf52	UPF0690 protein C1orf52 OS=Homo sapiens OX=9606 GN=C1orf52 PE=1 SV=1	20.599	182	1.09358	0.129053	0.127443	0.990959	4	19.7809	19.7625	19.6929	19.5924
Q9H9T3	ELP3_HUMAN	ELP3	Elongator complex protein 3 OS=Homo sapiens OX=9606 GN=ELP3 PE=1 SV=2	62.259	547	1.09356	0.129029	0.368875	0.990959	4	19.9872	19.8108	19.7007	19.8393
P12956	XRCC6_HUMAN	XRCC6	X-ray repair cross-complementing protein 6 OS=Homo sapiens OX=9606 GN=XRCC6 PE=1 SV=2	69.843	609	1.09345	0.128891	0.235741	0.990959	4	24.1373	24.0829	23.9093	24.0531
Q9NRG9	AAAS_HUMAN	AAAS	Aladin OS=Homo sapiens OX=9606 GN=AAAS PE=1 SV=1	59.574	546	1.09332	0.128721	0.240662	0.990959	4	21.249	21.2815	21.0602	21.2128
Q15843	NEDD8_HUMAN	NEDD8	NEDD8 OS=Homo sapiens OX=9606 GN=NEDD8 PE=1 SV=1	9.072	81	1.09329	0.12867	0.73656	0.990959	4	23.9933	23.7727	23.44	24.0687
Q99959	PKP2_HUMAN	PKP2	Plakophilin-2 OS=Homo sapiens OX=9606 GN=PKP2 PE=1 SV=2	97.415	881	1.09325	0.128621	0.434916	0.990959	4	20.0349	20.0527	19.7827	20.0477
Q9NX00	TM160_HUMAN	TMEM160	Transmembrane protein 160 OS=Homo sapiens OX=9606 GN=TMEM160 PE=1 SV=1	19.658	188	1.09324	0.128612	0.484165	0.990959	4	20.4737	20.2923	20.1336	20.3752
Q9HAF1	EAF6_HUMAN	MEAF6	Chromatin modification-related protein MEAF6 OS=Homo sapiens OX=9606 GN=MEAF6 PE=1 SV=1	21.635	191	1.09318	0.128528	0.0544805	0.990959	4	20.8297	20.7717	20.684	20.6604
O43805	SSNA1_HUMAN	SSNA1	Sjoegren syndrome nuclear autoantigen 1 OS=Homo sapiens OX=9606 GN=SSNA1 PE=1 SV=2	13.596	119	1.09314	0.128478	0.556056	0.990959	4	19.9937	19.8796	19.6339	19.9825
Q8IVH8	M4K3_HUMAN	MAP4K3	Mitogen-activated protein kinase kinase kinase kinase 3 OS=Homo sapiens OX=9606 GN=MAP4K3 PE=1 SV=1	101.316	894	1.09294	0.128217	0.544029	0.990959	4	17.8215	17.9729	17.9289	17.609
Q96EY1	DNJA3_HUMAN	DNAJA3	DnaJ homolog subfamily A member 3, mitochondrial OS=Homo sapiens OX=9606 GN=DNAJA3 PE=1 SV=2	52.489	480	1.09275	0.127967	0.0192074	0.990959	4	21.3054	21.2826	21.1521	21.18
P04114	APOB_HUMAN	APOB	Apolipoprotein B-100 OS=Homo sapiens OX=9606 GN=APOB PE=1 SV=2	515.605	4563	1.09275	0.127958	0.335502	0.990959	4	21.1134	21.0971	20.8758	21.0787
Q9BTF0	THUM2_HUMAN	THUMPD2	THUMP domain-containing protein 2 OS=Homo sapiens OX=9606 GN=THUMPD2 PE=1 SV=2	56.433	503	1.09271	0.127917	0.644351	0.990959	4	17.7623	17.3123	17.3327	17.486
P16930	FAAA_HUMAN	FAH	Fumarylacetoacetase OS=Homo sapiens OX=9606 GN=FAH PE=1 SV=2	46.374	419	1.09268	0.12787	0.475027	0.990959	4	20.525	20.7966	20.4777	20.5881
P51397	DAP1_HUMAN	DAP	Death-associated protein 1 OS=Homo sapiens OX=9606 GN=DAP PE=1 SV=3	11.165	102	1.09255	0.127706	0.789536	0.993107	4	20.413	20.4616	19.8908	20.7283
Q9UKB3	DJC12_HUMAN	DNAJC12	DnaJ homolog subfamily C member 12 OS=Homo sapiens OX=9606 GN=DNAJC12 PE=1 SV=1	23.415	198	1.09182	0.126737	0.67256	0.990959	4	17.9526	18.1057	17.6554	18.1495
P06400	RB_HUMAN	RB1	Retinoblastoma-associated protein OS=Homo sapiens OX=9606 GN=RB1 PE=1 SV=2	106.159	928	1.0918	0.126714	0.170984	0.990959	4	17.4137	17.4267	17.2334	17.3536
Q15257	PTPA_HUMAN	PTPA	Serine/threonine-protein phosphatase 2A activator OS=Homo sapiens OX=9606 GN=PTPA PE=1 SV=3	40.668	358	1.09177	0.126675	0.420642	0.990959	4	22.8597	22.7728	22.5713	22.8078
Q8WWN8	ARAP3_HUMAN	ARAP3	Arf-GAP with Rho-GAP domain, ANK repeat and PH domain-containing protein 3 OS=Homo sapiens OX=9606 GN=ARAP3 PE=1 SV=1	169.844	1544	1.0917	0.126573	0.514572	0.990959	4	18.139	17.9336	18.034	17.7855
P26196	DDX6_HUMAN	DDX6	Probable ATP-dependent RNA helicase DDX6 OS=Homo sapiens OX=9606 GN=DDX6 PE=1 SV=2	54.417	483	1.09168	0.126544	0.097996	0.990959	4	22.9364	22.8515	22.7616	22.7731
Q9BW19	KIFC1_HUMAN	KIFC1	Kinesin-like protein KIFC1 OS=Homo sapiens OX=9606 GN=KIFC1 PE=1 SV=2	73.748	673	1.09165	0.126517	0.176499	0.990959	4	20.0886	19.9859	19.8766	19.9449
Q6NZI2	CAVN1_HUMAN	CAVIN1	Caveolae-associated protein 1 OS=Homo sapiens OX=9606 GN=CAVIN1 PE=1 SV=1	43.476	390	1.09164	0.126494	0.261163	0.990959	4	20.9408	20.905	20.7168	20.876
Q9P0M9	RM27_HUMAN	MRPL27	39S ribosomal protein L27, mitochondrial OS=Homo sapiens OX=9606 GN=MRPL27 PE=1 SV=1	16.073	148	1.09156	0.126393	0.0616788	0.990959	4	19.5365	19.5151	19.4305	19.3682
P13987	CD59_HUMAN	CD59	CD59 glycoprotein OS=Homo sapiens OX=9606 GN=CD59 PE=1 SV=1	14.177	128	1.09152	0.126343	0.635804	0.990959	4	21.5605	21.9013	21.4524	21.7567
Q8NDD1	CA131_HUMAN	C1orf131	Uncharacterized protein C1orf131 OS=Homo sapiens OX=9606 GN=C1orf131 PE=1 SV=4	32.61	293	1.09151	0.12633	0.267467	0.990959	4	18.7913	18.6464	18.5521	18.633
Q9BQ69	MACD1_HUMAN	MACROD1	ADP-ribose glycohydrolase MACROD1 OS=Homo sapiens OX=9606 GN=MACROD1 PE=1 SV=2	35.505	325	1.09145	0.126244	0.548706	0.990959	4	19.2343	19.4984	19.123	19.3572
Q9UM22	EPDR1_HUMAN	EPDR1	Mammalian ependymin-related protein 1 OS=Homo sapiens OX=9606 GN=EPDR1 PE=1 SV=2	25.437	224	1.09135	0.126109	0.614088	0.990959	4	18.7311	18.75	18.4015	18.8274
O00560	SDCB1_HUMAN	SDCBP	Syntenin-1 OS=Homo sapiens OX=9606 GN=SDCBP PE=1 SV=1	32.444	298	1.09134	0.126097	0.127498	0.990959	4	20.1409	20.2188	20.0225	20.085
Q03933	HSF2_HUMAN	HSF2	Heat shock factor protein 2 OS=Homo sapiens OX=9606 GN=HSF2 PE=1 SV=1	60.348	536	1.0913	0.126053	0.0922008	0.990959	4	15.8416	15.9196	15.7678	15.7413
Q96NA2	RILP_HUMAN	RILP	Rab-interacting lysosomal protein OS=Homo sapiens OX=9606 GN=RILP PE=1 SV=1	44.2	401	1.09119	0.125907	0.148923	0.990959	4	18.1375	18.0901	17.9383	18.0374
Q7Z7F7	RM55_HUMAN	MRPL55	39S ribosomal protein L55, mitochondrial OS=Homo sapiens OX=9606 GN=MRPL55 PE=1 SV=1	15.128	128	1.0911	0.125788	0.667788	0.990959	4	19.9162	20.0091	19.5886	20.085
Q9P107	GMIP_HUMAN	GMIP	GEM-interacting protein OS=Homo sapiens OX=9606 GN=GMIP PE=1 SV=2	106.683	970	1.09107	0.125749	0.156157	0.990959	4	18.3019	18.4109	18.2157	18.2456
Q9Y5T5	UBP16_HUMAN	USP16	Ubiquitin carboxyl-terminal hydrolase 16 OS=Homo sapiens OX=9606 GN=USP16 PE=1 SV=1	93.57	823	1.0909	0.125522	0.624166	0.990959	4	18.1641	18.136	18.2429	17.8061
Q03164	KMT2A_HUMAN	KMT2A	Histone-lysine N-methyltransferase 2A OS=Homo sapiens OX=9606 GN=KMT2A PE=1 SV=5	431.764	3969	1.09087	0.125477	0.142807	0.990959	4	18.4119	18.3248	18.2121	18.2736
Q7Z2E3	APTX_HUMAN	APTX	Aprataxin OS=Homo sapiens OX=9606 GN=APTX PE=1 SV=2	40.74	356	1.09084	0.125445	0.688308	0.990959	4	17.4275	17.2349	17.4584	16.9531
O75509	TNR21_HUMAN	TNFRSF21	Tumor necrosis factor receptor superfamily member 21 OS=Homo sapiens OX=9606 GN=TNFRSF21 PE=1 SV=1	71.845	655	1.09079	0.125373	0.728725	0.990959	4	16.1951	16.4357	16.4807	15.8994
Q8NFH5	NUP35_HUMAN	NUP35	Nucleoporin NUP35 OS=Homo sapiens OX=9606 GN=NUP35 PE=1 SV=1	34.774	326	1.09075	0.125321	0.00308066	0.823132	4	20.52	20.5068	20.3859	20.3903
Q99962	SH3G2_HUMAN	SH3GL2	Endophilin-A1 OS=Homo sapiens OX=9606 GN=SH3GL2 PE=1 SV=1	39.962	352	1.09071	0.125265	0.310097	0.990959	4	21.7036	21.773	21.5268	21.6993
Q9BXB4	OSB11_HUMAN	OSBPL11	Oxysterol-binding protein-related protein 11 OS=Homo sapiens OX=9606 GN=OSBPL11 PE=1 SV=2	83.643	747	1.09065	0.12519	0.0551128	0.990959	4	19.209	19.2599	19.0922	19.1264
Q5K4L6	S27A3_HUMAN	SLC27A3	Solute carrier family 27 member 3 OS=Homo sapiens OX=9606 GN=SLC27A3 PE=1 SV=4	73.55	683	1.09051	0.125005	0.200533	0.990959	4	17.4618	17.3705	17.2429	17.3394
P26368	U2AF2_HUMAN	U2AF2	Splicing factor U2AF 65 kDa subunit OS=Homo sapiens OX=9606 GN=U2AF2 PE=1 SV=4	53.501	475	1.09044	0.12491	0.497865	0.990959	4	22.8768	22.9601	22.6472	22.9398
Q9BUZ4	TRAF4_HUMAN	TRAF4	TNF receptor-associated factor 4 OS=Homo sapiens OX=9606 GN=TRAF4 PE=1 SV=1	53.543	470	1.09043	0.124896	0.30661	0.990959	4	17.7881	17.9228	17.7929	17.6682
Q9H1D9	RPC6_HUMAN	POLR3F	DNA-directed RNA polymerase III subunit RPC6 OS=Homo sapiens OX=9606 GN=POLR3F PE=1 SV=1	35.684	316	1.09034	0.124776	0.413566	0.990959	4	19.2091	19.1778	18.9478	19.1895
P06733	ENOA_HUMAN	ENO1	Alpha-enolase OS=Homo sapiens OX=9606 GN=ENO1 PE=1 SV=2	47.169	434	1.0901	0.124457	0.456348	0.990959	4	27.1868	27.153	26.9106	27.1803
P84077	ARF1_HUMAN	ARF1	ADP-ribosylation factor 1 OS=Homo sapiens OX=9606 GN=ARF1 PE=1 SV=2	20.697	181	1.09004	0.124376	0.602715	0.990959	4	26.3605	26.3485	26.027	26.4331
Q9BWE0	REPI1_HUMAN	REPIN1	Replication initiator 1 OS=Homo sapiens OX=9606 GN=REPIN1 PE=1 SV=1	63.575	567	1.09001	0.124345	0.395216	0.990959	4	18.6839	18.6798	18.6733	18.4417
Q53ET0	CRTC2_HUMAN	CRTC2	CREB-regulated transcription coactivator 2 OS=Homo sapiens OX=9606 GN=CRTC2 PE=1 SV=2	73.302	693	1.08992	0.124225	0.79372	0.993107	4	16.5551	15.8895	15.8473	16.3488
Q9UPM8	AP4E1_HUMAN	AP4E1	AP-4 complex subunit epsilon-1 OS=Homo sapiens OX=9606 GN=AP4E1 PE=1 SV=2	127.287	1137	1.0899	0.124195	0.397612	0.990959	4	17.2794	17.0474	17.0482	17.0302
Q9Y2H0	DLGP4_HUMAN	DLGAP4	Disks large-associated protein 4 OS=Homo sapiens OX=9606 GN=DLGAP4 PE=1 SV=3	108.012	992	1.08984	0.124114	0.45064	0.990959	4	18.7284	18.7383	18.7426	18.4759
O14949	QCR8_HUMAN	UQCRQ	Cytochrome b-c1 complex subunit 8 OS=Homo sapiens OX=9606 GN=UQCRQ PE=1 SV=4	9.906	82	1.08975	0.123992	0.535814	0.990959	4	21.9773	21.7511	21.617	21.8635
Q8N1F8	S11IP_HUMAN	STK11IP	Serine/threonine-protein kinase 11-interacting protein OS=Homo sapiens OX=9606 GN=STK11IP PE=1 SV=4	120.259	1088	1.08964	0.123857	0.45481	0.990959	4	18.4873	18.2469	18.304	18.1825
Q86WJ1	CHD1L_HUMAN	CHD1L	Chromodomain-helicase-DNA-binding protein 1-like OS=Homo sapiens OX=9606 GN=CHD1L PE=1 SV=3	101	897	1.08962	0.123819	0.214129	0.990959	4	20.2216	20.095	20.0074	20.0616
Q5VT66	MARC1_HUMAN	MTARC1	Mitochondrial amidoxime-reducing component 1 OS=Homo sapiens OX=9606 GN=MTARC1 PE=1 SV=1	37.499	337	1.0896	0.1238	0.666165	0.990959	4	21.066	21.3848	20.9127	21.2905
Q86TB9	PATL1_HUMAN	PATL1	Protein PAT1 homolog 1 OS=Homo sapiens OX=9606 GN=PATL1 PE=1 SV=2	86.85	770	1.08956	0.123752	0.262993	0.990959	4	20.6691	20.6531	20.6172	20.4575
Q8WTS1	ABHD5_HUMAN	ABHD5	1-acylglycerol-3-phosphate O-acyltransferase ABHD5 OS=Homo sapiens OX=9606 GN=ABHD5 PE=1 SV=1	39.096	349	1.08952	0.123695	0.469162	0.990959	4	21.0536	20.9942	20.7637	21.0366
P30408	T4S1_HUMAN	TM4SF1	Transmembrane 4 L6 family member 1 OS=Homo sapiens OX=9606 GN=TM4SF1 PE=1 SV=1	21.632	202	1.08944	0.123583	0.879607	0.998138	4	21.4212	22.0498	20.9635	22.2603
Q99808	S29A1_HUMAN	SLC29A1	Equilibrative nucleoside transporter 1 OS=Homo sapiens OX=9606 GN=SLC29A1 PE=1 SV=3	50.219	456	1.08941	0.123553	0.32661	0.990959	4	20.4643	20.5192	20.2763	20.4601
Q8WUX2	CHAC2_HUMAN	CHAC2	Glutathione-specific gamma-glutamylcyclotransferase 2 OS=Homo sapiens OX=9606 GN=CHAC2 PE=1 SV=1	20.875	184	1.08937	0.123493	0.523717	0.990959	4	19.2455	19.105	18.9067	19.1969
Q15070	OXA1L_HUMAN	OXA1L	Mitochondrial inner membrane protein OXA1L OS=Homo sapiens OX=9606 GN=OXA1L PE=1 SV=3	48.548	435	1.08935	0.12347	0.12977	0.990959	4	20.7154	20.8009	20.6098	20.6595
P19075	TSN8_HUMAN	TSPAN8	Tetraspanin-8 OS=Homo sapiens OX=9606 GN=TSPAN8 PE=1 SV=1	26.044	237	1.08932	0.123422	0.142418	0.990959	4	19.2651	19.2164	19.071	19.1637
Q99496	RING2_HUMAN	RNF2	E3 ubiquitin-protein ligase RING2 OS=Homo sapiens OX=9606 GN=RNF2 PE=1 SV=1	37.655	336	1.08925	0.123333	0.265325	0.990959	4	21.1687	21.2328	21.0035	21.1513
P51649	SSDH_HUMAN	ALDH5A1	Succinate-semialdehyde dehydrogenase, mitochondrial OS=Homo sapiens OX=9606 GN=ALDH5A1 PE=1 SV=2	57.215	535	1.08925	0.12333	0.000195773	0.210596	4	20.162	20.1587	20.0375	20.0366
P20290	BTF3_HUMAN	BTF3	Transcription factor BTF3 OS=Homo sapiens OX=9606 GN=BTF3 PE=1 SV=1	22.168	206	1.08912	0.12316	0.273531	0.990959	4	23.6765	23.5438	23.4382	23.5358
O95571	ETHE1_HUMAN	ETHE1	Persulfide dioxygenase ETHE1, mitochondrial OS=Homo sapiens OX=9606 GN=ETHE1 PE=1 SV=2	27.873	254	1.08907	0.123094	0.463984	0.990959	4	20.0089	20.2826	20.0142	20.0311
O43809	CPSF5_HUMAN	NUDT21	Cleavage and polyadenylation specificity factor subunit 5 OS=Homo sapiens OX=9606 GN=NUDT21 PE=1 SV=1	26.227	227	1.08888	0.122846	0.353304	0.990959	4	22.4103	22.3574	22.162	22.36
Q2TAZ0	ATG2A_HUMAN	ATG2A	Autophagy-related protein 2 homolog A OS=Homo sapiens OX=9606 GN=ATG2A PE=1 SV=3	212.86	1938	1.08886	0.122817	0.0152458	0.990959	4	20.194	20.1682	20.05	20.0666
Q8WXX5	DNJC9_HUMAN	DNAJC9	DnaJ homolog subfamily C member 9 OS=Homo sapiens OX=9606 GN=DNAJC9 PE=1 SV=1	29.91	260	1.08886	0.122816	0.355928	0.990959	4	22.1632	22.0287	21.8949	22.0514
Q9NVR2	INT10_HUMAN	INTS10	Integrator complex subunit 10 OS=Homo sapiens OX=9606 GN=INTS10 PE=1 SV=2	82.236	710	1.08882	0.122762	0.0111269	0.990959	4	19.1285	19.128	18.9924	19.0186
P06280	AGAL_HUMAN	GLA	Alpha-galactosidase A OS=Homo sapiens OX=9606 GN=GLA PE=1 SV=1	48.767	429	1.08874	0.122664	0.414304	0.990959	4	18.2326	18.2603	18.0046	18.243
P62701	RS4X_HUMAN	RPS4X	40S ribosomal protein S4, X isoform OS=Homo sapiens OX=9606 GN=RPS4X PE=1 SV=2	29.598	263	1.08873	0.122643	0.177192	0.990959	4	25.0972	25.0989	24.9156	25.0353
Q8TCG1	CIP2A_HUMAN	CIP2A	Protein CIP2A OS=Homo sapiens OX=9606 GN=CIP2A PE=1 SV=2	102.185	905	1.08872	0.122635	0.260134	0.990959	4	19.7004	19.7256	19.5126	19.6682
Q9NX62	IMPA3_HUMAN	BPNT2	Golgi-resident adenosine 3',5'-bisphosphate 3'-phosphatase OS=Homo sapiens OX=9606 GN=BPNT2 PE=1 SV=1	38.681	359	1.08861	0.122487	0.389014	0.990959	4	19.9032	19.8817	19.6582	19.8816
Q6NUK4	REEP3_HUMAN	REEP3	Receptor expression-enhancing protein 3 OS=Homo sapiens OX=9606 GN=REEP3 PE=1 SV=1	29.264	255	1.08825	0.122007	0.2771	0.990959	4	18.7754	18.7196	18.5479	18.7031
P08708	RS17_HUMAN	RPS17	40S ribosomal protein S17 OS=Homo sapiens OX=9606 GN=RPS17 PE=1 SV=2	15.55	135	1.08825	0.122005	0.498514	0.990959	4	24.6488	24.4468	24.3165	24.5351
Q8N8Q8	COX18_HUMAN	COX18	Cytochrome c oxidase assembly protein COX18, mitochondrial OS=Homo sapiens OX=9606 GN=COX18 PE=1 SV=1	37.063	333	1.08817	0.121899	0.219939	0.990959	4	19.4843	19.3669	19.3403	19.2671
Q7Z7H5	TMED4_HUMAN	TMED4	Transmembrane emp24 domain-containing protein 4 OS=Homo sapiens OX=9606 GN=TMED4 PE=1 SV=1	25.943	227	1.08809	0.121792	0.171519	0.990959	4	20.6285	20.5862	20.4314	20.5398
O75179	ANR17_HUMAN	ANKRD17	Ankyrin repeat domain-containing protein 17 OS=Homo sapiens OX=9606 GN=ANKRD17 PE=1 SV=3	274.258	2603	1.08801	0.121689	0.0864121	0.990959	4	20.9651	21.0402	20.8736	20.8883
P51811	XK_HUMAN	XK	Membrane transport protein XK OS=Homo sapiens OX=9606 GN=XK PE=1 SV=5	50.902	444	1.08784	0.12146	0.690227	0.990959	4	18.0249	17.9442	18.1236	17.6026
Q9H6H4	REEP4_HUMAN	REEP4	Receptor expression-enhancing protein 4 OS=Homo sapiens OX=9606 GN=REEP4 PE=1 SV=1	29.395	257	1.08778	0.121383	0.634903	0.990959	4	19.8599	19.7181	19.4606	19.8747
Q14686	NCOA6_HUMAN	NCOA6	Nuclear receptor coactivator 6 OS=Homo sapiens OX=9606 GN=NCOA6 PE=1 SV=3	219.145	2063	1.08777	0.121375	0.140985	0.990959	4	17.4381	17.3469	17.2943	17.248
Q9Y3C8	UFC1_HUMAN	UFC1	Ubiquitin-fold modifier-conjugating enzyme 1 OS=Homo sapiens OX=9606 GN=UFC1 PE=1 SV=3	19.458	167	1.08777	0.121373	0.415477	0.990959	4	22.2678	22.2209	22.0062	22.2398
P17029	ZKSC1_HUMAN	ZKSCAN1	Zinc finger protein with KRAB and SCAN domains 1 OS=Homo sapiens OX=9606 GN=ZKSCAN1 PE=1 SV=3	63.63	563	1.0877	0.121281	0.598103	0.990959	4	17.3317	16.9919	16.9441	17.137
Q9H9A5	CNO10_HUMAN	CNOT10	CCR4-NOT transcription complex subunit 10 OS=Homo sapiens OX=9606 GN=CNOT10 PE=1 SV=1	82.31	744	1.08767	0.121236	0.135913	0.990959	4	21.0827	21.1038	20.9232	21.0208
O95479	G6PE_HUMAN	H6PD	GDH/6PGL endoplasmic bifunctional protein OS=Homo sapiens OX=9606 GN=H6PD PE=1 SV=2	88.893	791	1.08763	0.121181	0.293261	0.990959	4	17.7083	17.5804	17.5804	17.466
Q9NZZ3	CHMP5_HUMAN	CHMP5	Charged multivesicular body protein 5 OS=Homo sapiens OX=9606 GN=CHMP5 PE=1 SV=1	24.571	219	1.0876	0.121149	0.565802	0.990959	4	22.5351	22.4026	22.1828	22.5126
P01130	LDLR_HUMAN	LDLR	Low-density lipoprotein receptor OS=Homo sapiens OX=9606 GN=LDLR PE=1 SV=1	95.376	860	1.08759	0.121135	0.183849	0.990959	4	19.491	19.6062	19.4465	19.4084
Q9Y217	MTMR6_HUMAN	MTMR6	Myotubularin-related protein 6 OS=Homo sapiens OX=9606 GN=MTMR6 PE=1 SV=3	71.968	621	1.08758	0.121121	0.508134	0.990959	4	21.4723	21.1967	21.2766	21.1502
Q9Y5L4	TIM13_HUMAN	TIMM13	Mitochondrial import inner membrane translocase subunit Tim13 OS=Homo sapiens OX=9606 GN=TIMM13 PE=1 SV=1	10.5	95	1.08756	0.121098	0.60861	0.990959	4	21.0666	20.9969	20.7124	21.1089
P15170	ERF3A_HUMAN	GSPT1	Eukaryotic peptide chain release factor GTP-binding subunit ERF3A OS=Homo sapiens OX=9606 GN=GSPT1 PE=1 SV=1	55.756	499	1.08736	0.120826	0.28613	0.990959	4	23.7148	23.6607	23.4876	23.6462
O75380	NDUS6_HUMAN	NDUFS6	NADH dehydrogenase [ubiquinone] iron-sulfur protein 6, mitochondrial OS=Homo sapiens OX=9606 GN=NDUFS6 PE=1 SV=1	13.712	124	1.08732	0.120774	0.132907	0.990959	4	20.3982	20.3195	20.2087	20.2674
Q08357	S20A2_HUMAN	SLC20A2	Sodium-dependent phosphate transporter 2 OS=Homo sapiens OX=9606 GN=SLC20A2 PE=1 SV=1	70.392	652	1.0873	0.120748	0.634381	0.990959	4	16.7164	16.3688	16.5524	16.2913
Q9BQA1	MEP50_HUMAN	WDR77	Methylosome protein 50 OS=Homo sapiens OX=9606 GN=WDR77 PE=1 SV=1	36.724	342	1.08728	0.120729	0.61596	0.990959	4	23.1358	23.1247	22.8044	23.2147
Q96PE3	INP4A_HUMAN	INPP4A	Inositol polyphosphate-4-phosphatase type I A OS=Homo sapiens OX=9606 GN=INPP4A PE=1 SV=1	109.956	977	1.08728	0.120722	0.0911384	0.990959	4	18.4675	18.4626	18.3053	18.3835
P10620	MGST1_HUMAN	MGST1	Microsomal glutathione S-transferase 1 OS=Homo sapiens OX=9606 GN=MGST1 PE=1 SV=1	17.599	155	1.08721	0.120627	0.524654	0.990959	4	23.4021	23.6769	23.3412	23.4966
Q8N0Y2	ZN444_HUMAN	ZNF444	Zinc finger protein 444 OS=Homo sapiens OX=9606 GN=ZNF444 PE=1 SV=1	35.204	327	1.08715	0.120547	0.51973	0.990959	4	17.048	16.826	16.9256	16.7073
P17813	EGLN_HUMAN	ENG	Endoglin OS=Homo sapiens OX=9606 GN=ENG PE=1 SV=2	70.578	658	1.08706	0.120436	0.101137	0.990959	4	20.8252	20.8826	20.7035	20.7635
O00425	IF2B3_HUMAN	IGF2BP3	Insulin-like growth factor 2 mRNA-binding protein 3 OS=Homo sapiens OX=9606 GN=IGF2BP3 PE=1 SV=2	63.705	579	1.08704	0.1204	0.133524	0.990959	4	21.3423	21.2912	21.1545	21.2382
Q6NXT1	ANR54_HUMAN	ANKRD54	Ankyrin repeat domain-containing protein 54 OS=Homo sapiens OX=9606 GN=ANKRD54 PE=1 SV=2	32.505	300	1.08701	0.120367	0.264711	0.990959	4	17.7204	17.8653	17.7026	17.6424
P09601	HMOX1_HUMAN	HMOX1	Heme oxygenase 1 OS=Homo sapiens OX=9606 GN=HMOX1 PE=1 SV=1	32.819	288	1.08689	0.120207	0.342294	0.990959	4	20.5466	20.4017	20.2889	20.419
Q5FWF5	ESCO1_HUMAN	ESCO1	N-acetyltransferase ESCO1 OS=Homo sapiens OX=9606 GN=ESCO1 PE=1 SV=3	94.983	840	1.08678	0.12006	0.806914	0.993107	4	16.4792	15.8089	15.7523	16.2957
O60858	TRI13_HUMAN	TRIM13	E3 ubiquitin-protein ligase TRIM13 OS=Homo sapiens OX=9606 GN=TRIM13 PE=1 SV=2	46.988	407	1.08678	0.120056	0.234855	0.990959	4	17.742	17.6625	17.6415	17.5228
Q9UBW7	ZMYM2_HUMAN	ZMYM2	Zinc finger MYM-type protein 2 OS=Homo sapiens OX=9606 GN=ZMYM2 PE=1 SV=1	154.911	1377	1.08677	0.120043	0.052737	0.990959	4	18.144	18.1989	18.0429	18.0599
Q96CB8	INT12_HUMAN	INTS12	Integrator complex subunit 12 OS=Homo sapiens OX=9606 GN=INTS12 PE=1 SV=1	48.808	462	1.08673	0.119998	0.367417	0.990959	4	17.6934	17.7512	17.7021	17.5025
P52597	HNRPF_HUMAN	HNRNPF	Heterogeneous nuclear ribonucleoprotein F OS=Homo sapiens OX=9606 GN=HNRNPF PE=1 SV=3	45.672	415	1.08673	0.11999	0.309306	0.990959	4	23.7264	23.8279	23.5843	23.7301
P19447	ERCC3_HUMAN	ERCC3	General transcription and DNA repair factor IIH helicase subunit XPB OS=Homo sapiens OX=9606 GN=ERCC3 PE=1 SV=1	89.278	782	1.08668	0.119929	0.311336	0.990959	4	21.4633	21.337	21.2171	21.3433
Q7Z434	MAVS_HUMAN	MAVS	Mitochondrial antiviral-signaling protein OS=Homo sapiens OX=9606 GN=MAVS PE=1 SV=2	56.528	540	1.08663	0.119865	0.32405	0.990959	4	20.1635	20.2918	20.0413	20.1743
A6ND36	FA83G_HUMAN	FAM83G	Protein FAM83G OS=Homo sapiens OX=9606 GN=FAM83G PE=1 SV=2	90.835	823	1.08661	0.119833	0.0710387	0.990959	4	16.6698	16.7148	16.5473	16.5976
Q96BT3	CENPT_HUMAN	CENPT	Centromere protein T OS=Homo sapiens OX=9606 GN=CENPT PE=1 SV=2	60.423	561	1.08659	0.119804	0.642165	0.990959	4	16.3574	16.3831	16.4712	16.0298
Q9Y4F1	FARP1_HUMAN	FARP1	FERM, ARHGEF and pleckstrin domain-containing protein 1 OS=Homo sapiens OX=9606 GN=FARP1 PE=1 SV=1	118.633	1045	1.08644	0.11961	0.0924795	0.990959	4	18.9634	18.916	18.7889	18.8513
Q9BXS6	NUSAP_HUMAN	NUSAP1	Nucleolar and spindle-associated protein 1 OS=Homo sapiens OX=9606 GN=NUSAP1 PE=1 SV=1	49.452	441	1.08638	0.119528	0.0145322	0.990959	4	19.8481	19.83	19.7309	19.7081
Q9NS69	TOM22_HUMAN	TOMM22	Mitochondrial import receptor subunit TOM22 homolog OS=Homo sapiens OX=9606 GN=TOMM22 PE=1 SV=3	15.522	142	1.08637	0.119511	0.701809	0.990959	4	21.0977	20.7228	20.5957	20.9858
Q8WWC4	MAIP1_HUMAN	MAIP1	m-AAA protease-interacting protein 1, mitochondrial OS=Homo sapiens OX=9606 GN=MAIP1 PE=1 SV=1	32.545	291	1.08635	0.119484	0.449824	0.990959	4	20.4387	20.3676	20.1604	20.4069
O43815	STRN_HUMAN	STRN	Striatin OS=Homo sapiens OX=9606 GN=STRN PE=1 SV=4	86.132	780	1.08629	0.119414	0.215801	0.990959	4	19.1596	19.2674	19.0547	19.1336
Q92614	MY18A_HUMAN	MYO18A	Unconventional myosin-XVIIIa OS=Homo sapiens OX=9606 GN=MYO18A PE=1 SV=3	233.115	2054	1.0862	0.119287	0.188807	0.990959	4	18.9921	18.9012	18.787	18.8677
P31937	3HIDH_HUMAN	HIBADH	3-hydroxyisobutyrate dehydrogenase, mitochondrial OS=Homo sapiens OX=9606 GN=HIBADH PE=1 SV=2	35.329	336	1.086	0.119029	0.581321	0.990959	4	20.3957	20.2893	20.0489	20.3981
Q5VYK3	ECM29_HUMAN	ECPAS	Proteasome adapter and scaffold protein ECM29 OS=Homo sapiens OX=9606 GN=ECPAS PE=1 SV=2	204.291	1845	1.08592	0.118922	0.32103	0.990959	4	22.0814	22.0881	21.875	22.0567
Q9NPF0	CD320_HUMAN	CD320	CD320 antigen OS=Homo sapiens OX=9606 GN=CD320 PE=1 SV=1	28.991	282	1.08589	0.118881	0.173668	0.990959	4	20.2918	20.3777	20.1779	20.2538
Q9NTJ5	SAC1_HUMAN	SACM1L	Phosphatidylinositol-3-phosphatase SAC1 OS=Homo sapiens OX=9606 GN=SACM1L PE=1 SV=2	66.967	587	1.08572	0.118653	0.227969	0.990959	4	20.6277	20.6146	20.4337	20.5713
P20936	RASA1_HUMAN	RASA1	Ras GTPase-activating protein 1 OS=Homo sapiens OX=9606 GN=RASA1 PE=1 SV=1	116.403	1047	1.08566	0.118578	0.535301	0.990959	4	18.4343	18.1961	18.3031	18.0901
O75879	GATB_HUMAN	GATB	Glutamyl-tRNA(Gln) amidotransferase subunit B, mitochondrial OS=Homo sapiens OX=9606 GN=GATB PE=1 SV=1	61.864	557	1.08561	0.118507	0.465052	0.990959	4	19.4943	19.4047	19.2064	19.4555
Q86YT6	MIB1_HUMAN	MIB1	E3 ubiquitin-protein ligase MIB1 OS=Homo sapiens OX=9606 GN=MIB1 PE=1 SV=1	110.136	1006	1.08548	0.118339	0.607347	0.990959	4	17.4995	17.6579	17.6396	17.2811
A0JLT2	MED19_HUMAN	MED19	Mediator of RNA polymerase II transcription subunit 19 OS=Homo sapiens OX=9606 GN=MED19 PE=1 SV=2	26.273	244	1.08544	0.118283	0.171136	0.990959	4	17.2555	17.3052	17.2127	17.1114
Q9BXY0	MAK16_HUMAN	MAK16	Protein MAK16 homolog OS=Homo sapiens OX=9606 GN=MAK16 PE=1 SV=2	35.369	300	1.08534	0.118147	0.116599	0.990959	4	20.0544	20.1131	19.9324	19.9988
Q9BVS4	RIOK2_HUMAN	RIOK2	Serine/threonine-protein kinase RIO2 OS=Homo sapiens OX=9606 GN=RIOK2 PE=1 SV=2	63.283	552	1.08529	0.118079	0.456733	0.990959	4	19.0143	18.8717	18.9325	18.7174
Q86VS8	HOOK3_HUMAN	HOOK3	Protein Hook homolog 3 OS=Homo sapiens OX=9606 GN=HOOK3 PE=1 SV=2	83.126	718	1.08496	0.11764	0.233973	0.990959	4	19.2381	19.099	19.0448	19.0571
Q5T3J3	LRIF1_HUMAN	LRIF1	Ligand-dependent nuclear receptor-interacting factor 1 OS=Homo sapiens OX=9606 GN=LRIF1 PE=1 SV=1	84.568	769	1.08494	0.117613	0.337789	0.990959	4	17.7285	17.7147	17.5101	17.6978
P35080	PROF2_HUMAN	PFN2	Profilin-2 OS=Homo sapiens OX=9606 GN=PFN2 PE=1 SV=3	15.046	140	1.08486	0.117509	0.640554	0.990959	4	18.9116	18.8162	18.9568	18.536
P30084	ECHM_HUMAN	ECHS1	Enoyl-CoA hydratase, mitochondrial OS=Homo sapiens OX=9606 GN=ECHS1 PE=1 SV=4	31.387	290	1.08471	0.117314	0.541561	0.990959	4	23.4427	23.4232	23.1551	23.4762
P13473	LAMP2_HUMAN	LAMP2	Lysosome-associated membrane glycoprotein 2 OS=Homo sapiens OX=9606 GN=LAMP2 PE=1 SV=2	44.961	410	1.08468	0.117275	0.676842	0.990959	4	19.7671	19.7242	19.3865	19.8703
Q8N0Z6	TTC5_HUMAN	TTC5	Tetratricopeptide repeat protein 5 OS=Homo sapiens OX=9606 GN=TTC5 PE=1 SV=2	48.928	440	1.08467	0.11725	0.0161005	0.990959	4	19.4912	19.4952	19.3909	19.361
Q9BXS9	S26A6_HUMAN	SLC26A6	Solute carrier family 26 member 6 OS=Homo sapiens OX=9606 GN=SLC26A6 PE=1 SV=1	82.967	759	1.08464	0.117219	0.686069	0.990959	4	18.5213	18.4727	18.6293	18.1303
Q8NEZ2	VP37A_HUMAN	VPS37A	Vacuolar protein sorting-associated protein 37A OS=Homo sapiens OX=9606 GN=VPS37A PE=1 SV=1	44.314	397	1.08455	0.117093	0.594691	0.990959	4	17.3564	17.0542	16.9784	17.1979
P36952	SPB5_HUMAN	SERPINB5	Serpin B5 OS=Homo sapiens OX=9606 GN=SERPINB5 PE=1 SV=2	42.1	375	1.08445	0.116963	0.487128	0.990959	4	19.6339	19.8206	19.5081	19.7125
Q8N128	F177A_HUMAN	FAM177A1	Protein FAM177A1 OS=Homo sapiens OX=9606 GN=FAM177A1 PE=1 SV=1	23.757	213	1.08442	0.116917	0.621509	0.990959	4	19.4072	19.3285	19.0526	19.4492
Q5W111	SPRY7_HUMAN	SPRYD7	SPRY domain-containing protein 7 OS=Homo sapiens OX=9606 GN=SPRYD7 PE=1 SV=2	21.666	196	1.08441	0.116908	0.0251264	0.990959	4	19.4845	19.4956	19.3912	19.3551
P42765	THIM_HUMAN	ACAA2	3-ketoacyl-CoA thiolase, mitochondrial OS=Homo sapiens OX=9606 GN=ACAA2 PE=1 SV=2	41.924	397	1.0844	0.1169	0.451197	0.990959	4	23.3637	23.2048	23.0697	23.2651
O15042	SR140_HUMAN	U2SURP	U2 snRNP-associated SURP motif-containing protein OS=Homo sapiens OX=9606 GN=U2SURP PE=1 SV=2	118.292	1029	1.08419	0.116624	0.102858	0.990959	4	22.738	22.7535	22.5892	22.669
Q2TAY7	SMU1_HUMAN	SMU1	WD40 repeat-containing protein SMU1 OS=Homo sapiens OX=9606 GN=SMU1 PE=1 SV=2	57.544	513	1.08417	0.116591	0.322892	0.990959	4	20.8787	20.8506	20.6596	20.8365
P62266	RS23_HUMAN	RPS23	40S ribosomal protein S23 OS=Homo sapiens OX=9606 GN=RPS23 PE=1 SV=3	15.808	143	1.08414	0.116546	0.865769	0.998138	4	21.3017	21.9997	21.0358	22.0325
Q6ZNJ1	NBEL2_HUMAN	NBEAL2	Neurobeachin-like protein 2 OS=Homo sapiens OX=9606 GN=NBEAL2 PE=1 SV=2	302.517	2754	1.08411	0.116517	0.589478	0.990959	4	19.245	19.2302	19.304	18.9383
Q96HE9	PRR11_HUMAN	PRR11	Proline-rich protein 11 OS=Homo sapiens OX=9606 GN=PRR11 PE=1 SV=1	40.085	360	1.08411	0.116514	0.357768	0.990959	4	17.164	16.9714	16.9712	16.9312
Q13555	KCC2G_HUMAN	CAMK2G	Calcium/calmodulin-dependent protein kinase type II subunit gamma OS=Homo sapiens OX=9606 GN=CAMK2G PE=1 SV=4	62.607	558	1.08404	0.116424	0.732168	0.990959	4	19.5238	19.5761	19.1385	19.7285
P63000	RAC1_HUMAN	RAC1	Ras-related C3 botulinum toxin substrate 1 OS=Homo sapiens OX=9606 GN=RAC1 PE=1 SV=1	21.45	192	1.08402	0.116389	0.484682	0.990959	4	22.525	22.7879	22.5019	22.5782
Q9H3P7	GCP60_HUMAN	ACBD3	Golgi resident protein GCP60 OS=Homo sapiens OX=9606 GN=ACBD3 PE=1 SV=4	60.593	528	1.08398	0.116336	0.360434	0.990959	4	21.3515	21.4497	21.1984	21.3701
Q6IBW4	CNDH2_HUMAN	NCAPH2	Condensin-2 complex subunit H2 OS=Homo sapiens OX=9606 GN=NCAPH2 PE=1 SV=1	68.227	605	1.0839	0.116226	0.206161	0.990959	4	19.2606	19.3638	19.1599	19.232
Q9Y4H2	IRS2_HUMAN	IRS2	Insulin receptor substrate 2 OS=Homo sapiens OX=9606 GN=IRS2 PE=1 SV=2	137.334	1338	1.08389	0.116224	0.249955	0.990959	4	19.0449	18.9	18.8576	18.8548
Q9H6D7	HAUS4_HUMAN	HAUS4	HAUS augmin-like complex subunit 4 OS=Homo sapiens OX=9606 GN=HAUS4 PE=1 SV=1	42.4	363	1.08381	0.116118	0.410527	0.990959	4	19.0579	19.0177	18.811	19.0324
Q9NXG6	P4HTM_HUMAN	P4HTM	Transmembrane prolyl 4-hydroxylase OS=Homo sapiens OX=9606 GN=P4HTM PE=1 SV=2	56.661	502	1.08373	0.116003	0.465152	0.990959	4	19.2644	19.1456	18.9738	19.2042
O43933	PEX1_HUMAN	PEX1	Peroxisome biogenesis factor 1 OS=Homo sapiens OX=9606 GN=PEX1 PE=1 SV=1	142.867	1283	1.08365	0.115897	0.650316	0.990959	4	19.4264	19.3984	19.5156	19.0774
Q6ZNA5	FRRS1_HUMAN	FRRS1	Ferric-chelate reductase 1 OS=Homo sapiens OX=9606 GN=FRRS1 PE=2 SV=2	66.114	592	1.08361	0.115845	0.259524	0.990959	4	17.3641	17.2403	17.1452	17.2276
Q86T82	UBP37_HUMAN	USP37	Ubiquitin carboxyl-terminal hydrolase 37 OS=Homo sapiens OX=9606 GN=USP37 PE=1 SV=2	110.17	979	1.08354	0.115753	0.692052	0.990959	4	15.5971	15.1716	15.132	15.4053
O43310	CTIF_HUMAN	CTIF	CBP80/20-dependent translation initiation factor OS=Homo sapiens OX=9606 GN=CTIF PE=1 SV=1	67.587	598	1.0835	0.1157	0.567543	0.990959	4	18.053	17.792	17.9166	17.6969
P33981	TTK_HUMAN	TTK	Dual specificity protein kinase TTK OS=Homo sapiens OX=9606 GN=TTK PE=1 SV=2	97.072	857	1.0835	0.115698	0.463053	0.990959	4	18.7682	18.8382	18.8112	18.5638
Q6GQQ9	OTU7B_HUMAN	OTUD7B	OTU domain-containing protein 7B OS=Homo sapiens OX=9606 GN=OTUD7B PE=1 SV=1	92.526	843	1.08349	0.115688	0.489485	0.990959	4	19.3269	19.3521	19.0866	19.361
Q8WWK9	CKAP2_HUMAN	CKAP2	Cytoskeleton-associated protein 2 OS=Homo sapiens OX=9606 GN=CKAP2 PE=1 SV=1	76.987	683	1.08347	0.115665	0.111477	0.990959	4	18.2337	18.2102	18.1469	18.0657
P49336	CDK8_HUMAN	CDK8	Cyclin-dependent kinase 8 OS=Homo sapiens OX=9606 GN=CDK8 PE=1 SV=1	53.284	464	1.08341	0.115575	0.405552	0.990959	4	18.3543	18.1359	18.147	18.1121
O60684	IMA7_HUMAN	KPNA6	Importin subunit alpha-7 OS=Homo sapiens OX=9606 GN=KPNA6 PE=1 SV=1	60.03	536	1.08341	0.115574	0.00697269	0.990959	4	21.7504	21.752	21.6453	21.626
Q9NQ29	LUC7L_HUMAN	LUC7L	Putative RNA-binding protein Luc7-like 1 OS=Homo sapiens OX=9606 GN=LUC7L PE=1 SV=1	43.728	371	1.08339	0.115557	0.206337	0.990959	4	19.9522	20.0036	19.8052	19.9194
Q9UH62	ARMX3_HUMAN	ARMCX3	Armadillo repeat-containing X-linked protein 3 OS=Homo sapiens OX=9606 GN=ARMCX3 PE=1 SV=1	42.501	379	1.08338	0.115535	0.105568	0.990959	4	19.9784	20.0599	19.9013	19.9059
P50613	CDK7_HUMAN	CDK7	Cyclin-dependent kinase 7 OS=Homo sapiens OX=9606 GN=CDK7 PE=1 SV=1	39.038	346	1.08321	0.115317	0.60735	0.990959	4	20.3009	20.0672	19.9176	20.2198
O75843	AP1G2_HUMAN	AP1G2	AP-1 complex subunit gamma-like 2 OS=Homo sapiens OX=9606 GN=AP1G2 PE=1 SV=1	87.117	785	1.0832	0.115295	0.59166	0.990959	4	17.5328	17.7432	17.3739	17.6716
Q15125	EBP_HUMAN	EBP	3-beta-hydroxysteroid-Delta(8),Delta(7)-isomerase OS=Homo sapiens OX=9606 GN=EBP PE=1 SV=3	26.353	230	1.08314	0.115226	0.443749	0.990959	4	24.8807	24.7973	24.6094	24.8382
Q86WB0	NIPA_HUMAN	ZC3HC1	Nuclear-interacting partner of ALK OS=Homo sapiens OX=9606 GN=ZC3HC1 PE=1 SV=1	55.262	502	1.08314	0.115216	0.0374674	0.990959	4	20.1023	20.1084	20.0129	19.9674
Q6ZVM7	TM1L2_HUMAN	TOM1L2	TOM1-like protein 2 OS=Homo sapiens OX=9606 GN=TOM1L2 PE=1 SV=1	55.556	507	1.08293	0.114937	0.704709	0.990959	4	17.9229	17.6913	17.9283	17.4561
P48723	HSP13_HUMAN	HSPA13	Heat shock 70 kDa protein 13 OS=Homo sapiens OX=9606 GN=HSPA13 PE=1 SV=1	51.927	471	1.0829	0.114905	0.272858	0.990959	4	20.1107	20.1124	19.9199	20.0734
Q6STE5	SMRD3_HUMAN	SMARCD3	SWI/SNF-related matrix-associated actin-dependent regulator of chromatin subfamily D member 3 OS=Homo sapiens OX=9606 GN=SMARCD3 PE=1 SV=1	55.016	483	1.08283	0.114811	0.34923	0.990959	4	18.3287	18.1409	18.1073	18.1326
Q969Y2	GTPB3_HUMAN	GTPBP3	tRNA modification GTPase GTPBP3, mitochondrial OS=Homo sapiens OX=9606 GN=GTPBP3 PE=1 SV=2	52.058	492	1.08278	0.114737	0.527652	0.990959	4	19.2395	18.973	18.9196	19.0634
Q86UY5	FA83A_HUMAN	FAM83A	Protein FAM83A OS=Homo sapiens OX=9606 GN=FAM83A PE=1 SV=1	47.458	434	1.08269	0.114614	0.443267	0.990959	4	17.6181	17.7634	17.4795	17.6728
Q96JC1	VPS39_HUMAN	VPS39	Vam6/Vps39-like protein OS=Homo sapiens OX=9606 GN=VPS39 PE=1 SV=2	101.809	886	1.0826	0.1145	0.0375862	0.990959	4	17.99	17.9548	17.8725	17.8433
O75586	MED6_HUMAN	MED6	Mediator of RNA polymerase II transcription subunit 6 OS=Homo sapiens OX=9606 GN=MED6 PE=1 SV=2	28.425	246	1.08254	0.114415	0.28025	0.990959	4	19.304	19.2943	19.2626	19.1068
Q5VU43	MYOME_HUMAN	PDE4DIP	Myomegalin OS=Homo sapiens OX=9606 GN=PDE4DIP PE=1 SV=3	265.103	2346	1.08251	0.114384	0.116691	0.990959	4	17.5277	17.6049	17.4331	17.4707
P49674	KC1E_HUMAN	CSNK1E	Casein kinase I isoform epsilon OS=Homo sapiens OX=9606 GN=CSNK1E PE=1 SV=1	47.315	416	1.08245	0.114301	0.451996	0.990959	4	19.9352	19.8772	19.9118	19.672
Q16706	MA2A1_HUMAN	MAN2A1	Alpha-mannosidase 2 OS=Homo sapiens OX=9606 GN=MAN2A1 PE=1 SV=2	131.141	1144	1.08244	0.114288	0.143789	0.990959	4	19.2002	19.218	19.0469	19.1428
Q9NYH9	UTP6_HUMAN	UTP6	U3 small nucleolar RNA-associated protein 6 homolog OS=Homo sapiens OX=9606 GN=UTP6 PE=1 SV=2	70.194	597	1.08241	0.114242	0.0666884	0.990959	4	20.077	20.1377	19.9864	19.9997
O15360	FANCA_HUMAN	FANCA	Fanconi anemia group A protein OS=Homo sapiens OX=9606 GN=FANCA PE=1 SV=2	162.775	1455	1.08237	0.114197	0.760547	0.992261	4	15.0485	15.1535	15.31	14.6636
Q9BSB4	ATGA1_HUMAN	ATG101	Autophagy-related protein 101 OS=Homo sapiens OX=9606 GN=ATG101 PE=1 SV=1	25.003	218	1.08226	0.114043	0.19221	0.990959	4	20.1226	20.1418	19.9601	20.0762
Q8NBL1	PGLT1_HUMAN	POGLUT1	Protein O-glucosyltransferase 1 OS=Homo sapiens OX=9606 GN=POGLUT1 PE=1 SV=1	46.189	392	1.08223	0.11401	0.737996	0.990959	4	18.5212	17.9418	18.0522	18.1828
Q9UHJ9	PGAP2_HUMAN	PGAP2	Post-GPI attachment to proteins factor 2 OS=Homo sapiens OX=9606 GN=PGAP2 PE=1 SV=2	29.4	254	1.08215	0.113905	0.189861	0.990959	4	17.761	17.6777	17.5646	17.6462
Q9BPZ3	PAIP2_HUMAN	PAIP2	Polyadenylate-binding protein-interacting protein 2 OS=Homo sapiens OX=9606 GN=PAIP2 PE=1 SV=1	14.984	127	1.08206	0.113784	0.754182	0.990959	4	21.2821	21.3616	20.8933	21.5228
Q0PNE2	ELP6_HUMAN	ELP6	Elongator complex protein 6 OS=Homo sapiens OX=9606 GN=ELP6 PE=1 SV=1	29.793	266	1.08203	0.113744	0.452688	0.990959	4	18.3713	18.3113	18.1083	18.3469
P30039	PBLD_HUMAN	PBLD	Phenazine biosynthesis-like domain-containing protein OS=Homo sapiens OX=9606 GN=PBLD PE=1 SV=2	31.785	288	1.08203	0.113737	0.728293	0.990959	4	17.5271	17.7326	17.7818	17.2504
P41567	EIF1_HUMAN	EIF1	Eukaryotic translation initiation factor 1 OS=Homo sapiens OX=9606 GN=EIF1 PE=1 SV=1	12.732	113	1.08192	0.1136	0.583794	0.990959	4	22.3205	22.5878	22.2268	22.4543
Q9UHJ3	SMBT1_HUMAN	SFMBT1	Scm-like with four MBT domains protein 1 OS=Homo sapiens OX=9606 GN=SFMBT1 PE=1 SV=2	98.141	866	1.08186	0.113519	0.851003	0.996096	4	17.2717	17.3282	17.7184	16.6545
Q9NX08	COMD8_HUMAN	COMMD8	COMM domain-containing protein 8 OS=Homo sapiens OX=9606 GN=COMMD8 PE=1 SV=1	21.09	183	1.08171	0.113315	0.409054	0.990959	4	18.2405	18.4319	18.2759	18.1699
P17405	ASM_HUMAN	SMPD1	Sphingomyelin phosphodiesterase OS=Homo sapiens OX=9606 GN=SMPD1 PE=1 SV=5	69.936	631	1.08157	0.113132	0.503383	0.990959	4	17.625	17.5929	17.357	17.6347
Q8TBB5	KLDC4_HUMAN	KLHDC4	Kelch domain-containing protein 4 OS=Homo sapiens OX=9606 GN=KLHDC4 PE=1 SV=1	57.892	520	1.08144	0.112957	0.00914392	0.990959	4	19.8298	19.8171	19.7193	19.7016
A0A0B4J2F0	PIOS1_HUMAN	PIGBOS1	Protein PIGBOS1 OS=Homo sapiens OX=9606 GN=PIGBOS1 PE=1 SV=1	6.313	54	1.08132	0.112799	0.416621	0.990959	4	18.6126	18.5851	18.3759	18.5963
P51790	CLCN3_HUMAN	CLCN3	H(+)/Cl(-) exchange transporter 3 OS=Homo sapiens OX=9606 GN=CLCN3 PE=1 SV=2	90.966	818	1.08131	0.112779	0.24146	0.990959	4	17.5478	17.6304	17.5309	17.4217
Q96IZ0	PAWR_HUMAN	PAWR	PRKC apoptosis WT1 regulator protein OS=Homo sapiens OX=9606 GN=PAWR PE=1 SV=1	36.568	340	1.0813	0.112771	0.427855	0.990959	4	21.1808	21.0894	20.9176	21.1271
P40227	TCPZ_HUMAN	CCT6A	T-complex protein 1 subunit zeta OS=Homo sapiens OX=9606 GN=CCT6A PE=1 SV=3	58.024	531	1.08124	0.112686	0.0139436	0.990959	4	24.1238	24.1287	24.0268	24.0003
Q9NPF5	DMAP1_HUMAN	DMAP1	DNA methyltransferase 1-associated protein 1 OS=Homo sapiens OX=9606 GN=DMAP1 PE=1 SV=1	52.993	467	1.08103	0.112412	0.548144	0.990959	4	19.9755	20.0091	19.7239	20.0359
Q96AH0	SOSB2_HUMAN	NABP1	SOSS complex subunit B2 OS=Homo sapiens OX=9606 GN=NABP1 PE=1 SV=1	22.423	204	1.08094	0.112281	0.5936	0.990959	4	18.972	19.1247	18.7747	19.0974
P42898	MTHR_HUMAN	MTHFR	Methylenetetrahydrofolate reductase OS=Homo sapiens OX=9606 GN=MTHFR PE=1 SV=3	74.597	656	1.08072	0.111995	0.671173	0.990959	4	18.9099	18.9594	18.5966	19.0487
Q96TA2	YMEL1_HUMAN	YME1L1	ATP-dependent zinc metalloprotease YME1L1 OS=Homo sapiens OX=9606 GN=YME1L1 PE=1 SV=2	86.455	773	1.08072	0.111989	0.221571	0.990959	4	20.5526	20.6058	20.4092	20.5252
Q9UHX3	AGRE2_HUMAN	ADGRE2	Adhesion G protein-coupled receptor E2 OS=Homo sapiens OX=9606 GN=ADGRE2 PE=1 SV=2	90.472	823	1.08047	0.111664	0.132183	0.990959	4	17.8263	17.9131	17.7453	17.7708
Q8NFI3	ENASE_HUMAN	ENGASE	Cytosolic endo-beta-N-acetylglucosaminidase OS=Homo sapiens OX=9606 GN=ENGASE PE=1 SV=1	83.987	743	1.08046	0.11164	0.600864	0.990959	4	18.4081	18.3898	18.4684	18.1062
Q96G01	BICD1_HUMAN	BICD1	Protein bicaudal D homolog 1 OS=Homo sapiens OX=9606 GN=BICD1 PE=1 SV=3	110.75	975	1.08041	0.111582	0.639745	0.990959	4	18.0288	18.1491	18.1726	17.7821
Q8N1G0	ZN687_HUMAN	ZNF687	Zinc finger protein 687 OS=Homo sapiens OX=9606 GN=ZNF687 PE=1 SV=1	129.529	1237	1.08036	0.111515	0.750293	0.990959	4	18.8206	18.4069	18.7274	18.2771
Q9NZJ5	E2AK3_HUMAN	EIF2AK3	Eukaryotic translation initiation factor 2-alpha kinase 3 OS=Homo sapiens OX=9606 GN=EIF2AK3 PE=1 SV=3	125.216	1116	1.08028	0.111399	0.883021	0.999214	4	16.6531	17.1104	17.3988	16.1419
P30291	WEE1_HUMAN	WEE1	Wee1-like protein kinase OS=Homo sapiens OX=9606 GN=WEE1 PE=1 SV=2	71.597	646	1.08026	0.111377	0.565743	0.990959	4	17.297	17.3129	17.3567	17.0304
Q9H649	NSUN3_HUMAN	NSUN3	tRNA (cytosine(34)-C(5))-methyltransferase, mitochondrial OS=Homo sapiens OX=9606 GN=NSUN3 PE=1 SV=1	38.244	340	1.08015	0.111234	0.368837	0.990959	4	16.5668	16.63	16.3958	16.5785
Q7Z624	CMKMT_HUMAN	CAMKMT	Calmodulin-lysine N-methyltransferase OS=Homo sapiens OX=9606 GN=CAMKMT PE=1 SV=2	36.128	323	1.08004	0.11108	0.280823	0.990959	4	16.9866	16.8558	16.8486	16.7716
Q8IWW6	RHG12_HUMAN	ARHGAP12	Rho GTPase-activating protein 12 OS=Homo sapiens OX=9606 GN=ARHGAP12 PE=1 SV=1	96.254	846	1.07989	0.110882	0.618521	0.990959	4	18.0908	18.2212	18.2236	17.8667
P61587	RND3_HUMAN	RND3	Rho-related GTP-binding protein RhoE OS=Homo sapiens OX=9606 GN=RND3 PE=1 SV=1	27.368	244	1.07987	0.110858	0.0402589	0.990959	4	17.8854	17.9014	17.761	17.804
Q9HA47	UCK1_HUMAN	UCK1	Uridine-cytidine kinase 1 OS=Homo sapiens OX=9606 GN=UCK1 PE=1 SV=1	31.435	277	1.07976	0.110711	0.61207	0.990959	4	21.7223	21.815	21.8381	21.4778
Q9H7L9	SDS3_HUMAN	SUDS3	Sin3 histone deacetylase corepressor complex component SDS3 OS=Homo sapiens OX=9606 GN=SUDS3 PE=1 SV=2	38.136	328	1.0797	0.110636	0.367602	0.990959	4	19.2862	19.0947	19.0759	19.0837
Q5R3F8	PPR29_HUMAN	ELFN2	Protein phosphatase 1 regulatory subunit 29 OS=Homo sapiens OX=9606 GN=ELFN2 PE=1 SV=1	89.687	820	1.07968	0.110605	0.573735	0.990959	4	15.8586	15.8529	15.5792	15.9111
Q6UXH1	CREL2_HUMAN	CRELD2	Protein disulfide isomerase CRELD2 OS=Homo sapiens OX=9606 GN=CRELD2 PE=1 SV=1	38.192	353	1.07961	0.110517	0.488504	0.990959	4	17.8556	17.7892	17.8389	17.5848
Q8NCN4	RN169_HUMAN	RNF169	E3 ubiquitin-protein ligase RNF169 OS=Homo sapiens OX=9606 GN=RNF169 PE=1 SV=2	77.194	708	1.07961	0.110505	0.0410508	0.990959	4	19.8787	19.9186	19.7765	19.7998
Q99536	VAT1_HUMAN	VAT1	Synaptic vesicle membrane protein VAT-1 homolog OS=Homo sapiens OX=9606 GN=VAT1 PE=1 SV=2	41.92	393	1.0796	0.110492	0.333265	0.990959	4	22.8289	22.8542	22.6446	22.8175
Q9H4A3	WNK1_HUMAN	WNK1	Serine/threonine-protein kinase WNK1 OS=Homo sapiens OX=9606 GN=WNK1 PE=1 SV=2	250.794	2382	1.07939	0.110212	0.102179	0.990959	4	19.4774	19.4078	19.3165	19.3482
Q9H0E3	SP130_HUMAN	SAP130	Histone deacetylase complex subunit SAP130 OS=Homo sapiens OX=9606 GN=SAP130 PE=1 SV=1	110.324	1048	1.07929	0.110079	0.335864	0.990959	4	18.7774	18.7274	18.5583	18.7263
Q9Y5T4	DJC15_HUMAN	DNAJC15	DnaJ homolog subfamily C member 15 OS=Homo sapiens OX=9606 GN=DNAJC15 PE=1 SV=2	16.383	150	1.07921	0.109972	0.0370362	0.990959	4	18.9301	18.8954	18.7896	18.8159
Q9Y4P1	ATG4B_HUMAN	ATG4B	Cysteine protease ATG4B OS=Homo sapiens OX=9606 GN=ATG4B PE=1 SV=2	44.294	393	1.0792	0.109956	0.695362	0.990959	4	19.0896	18.6668	18.8883	18.6482
Q9HAD4	WDR41_HUMAN	WDR41	WD repeat-containing protein 41 OS=Homo sapiens OX=9606 GN=WDR41 PE=1 SV=3	51.728	459	1.07915	0.109897	0.373763	0.990959	4	19.1492	19.1071	18.9239	19.1127
P35611	ADDA_HUMAN	ADD1	Alpha-adducin OS=Homo sapiens OX=9606 GN=ADD1 PE=1 SV=2	80.955	737	1.07898	0.109662	0.660149	0.990959	4	16.719	17.1269	16.7465	16.88
P60484	PTEN_HUMAN	PTEN	Phosphatidylinositol 3,4,5-trisphosphate 3-phosphatase and dual-specificity protein phosphatase PTEN OS=Homo sapiens OX=9606 GN=PTEN PE=1 SV=1	47.166	403	1.07897	0.109658	0.572308	0.990959	4	15.9	16.2146	15.9016	15.9937
Q9ULR0	ISY1_HUMAN	ISY1	Pre-mRNA-splicing factor ISY1 homolog OS=Homo sapiens OX=9606 GN=ISY1 PE=1 SV=3	32.992	285	1.07897	0.109655	0.677166	0.990959	4	19.9785	20.2605	19.8315	20.1882
Q99865	SPI2A_HUMAN	SPIN2A	Spindlin-2A OS=Homo sapiens OX=9606 GN=SPIN2A PE=1 SV=3	29.188	258	1.07886	0.109501	0.819196	0.993107	4	16.5749	15.9269	16.4105	15.8723
Q9H270	VPS11_HUMAN	VPS11	Vacuolar protein sorting-associated protein 11 homolog OS=Homo sapiens OX=9606 GN=VPS11 PE=1 SV=1	107.837	941	1.07872	0.109314	0.541864	0.990959	4	19.2358	19.0895	18.9224	19.1842
Q8N999	CL029_HUMAN	C12orf29	Uncharacterized protein C12orf29 OS=Homo sapiens OX=9606 GN=C12orf29 PE=1 SV=2	37.49	325	1.07861	0.109178	0.148056	0.990959	4	19.3687	19.3923	19.3172	19.2253
O75607	NPM3_HUMAN	NPM3	Nucleoplasmin-3 OS=Homo sapiens OX=9606 GN=NPM3 PE=1 SV=3	19.344	178	1.07844	0.108942	0.529737	0.990959	4	19.416	19.705	19.4559	19.4472
Q14155	ARHG7_HUMAN	ARHGEF7	Rho guanine nucleotide exchange factor 7 OS=Homo sapiens OX=9606 GN=ARHGEF7 PE=1 SV=2	90.012	803	1.07837	0.108858	0.034905	0.990959	4	20.2334	20.1924	20.1082	20.0999
P09758	TACD2_HUMAN	TACSTD2	Tumor-associated calcium signal transducer 2 OS=Homo sapiens OX=9606 GN=TACSTD2 PE=1 SV=3	35.709	323	1.07836	0.108836	0.454984	0.990959	4	19.4675	19.62	19.3444	19.5255
Q08209	PP2BA_HUMAN	PPP3CA	Serine/threonine-protein phosphatase 2B catalytic subunit alpha isoform OS=Homo sapiens OX=9606 GN=PPP3CA PE=1 SV=1	58.688	521	1.07818	0.108601	0.501933	0.990959	4	21.7965	21.7901	21.551	21.8183
Q15633	TRBP2_HUMAN	TARBP2	RISC-loading complex subunit TARBP2 OS=Homo sapiens OX=9606 GN=TARBP2 PE=1 SV=3	39.039	366	1.07816	0.108572	0.0135327	0.990959	4	19.5385	19.5559	19.448	19.4293
Q9UBD5	ORC3_HUMAN	ORC3	Origin recognition complex subunit 3 OS=Homo sapiens OX=9606 GN=ORC3 PE=1 SV=1	82.254	711	1.07814	0.108542	0.468332	0.990959	4	19.1779	19.32	19.0409	19.2399
Q9BVG9	PTSS2_HUMAN	PTDSS2	Phosphatidylserine synthase 2 OS=Homo sapiens OX=9606 GN=PTDSS2 PE=1 SV=1	56.253	487	1.07811	0.108504	0.38034	0.990959	4	19.9244	20.118	19.9209	19.9045
Q0VDG4	SCRN3_HUMAN	SCRN3	Secernin-3 OS=Homo sapiens OX=9606 GN=SCRN3 PE=1 SV=1	48.544	424	1.07811	0.108499	0.148672	0.990959	4	18.7347	18.8101	18.6353	18.6925
P18440	ARY1_HUMAN	NAT1	Arylamine N-acetyltransferase 1 OS=Homo sapiens OX=9606 GN=NAT1 PE=1 SV=2	33.899	290	1.07803	0.108391	0.927533	1	4	16.3154	16.401	17.3038	15.1958
Q96MY1	NOL4L_HUMAN	NOL4L	Nucleolar protein 4-like OS=Homo sapiens OX=9606 GN=NOL4L PE=1 SV=2	47.215	436	1.07794	0.108279	0.210358	0.990959	4	18.8875	19.0042	18.8259	18.8493
Q8IWR0	Z3H7A_HUMAN	ZC3H7A	Zinc finger CCCH domain-containing protein 7A OS=Homo sapiens OX=9606 GN=ZC3H7A PE=1 SV=1	110.538	971	1.07789	0.108214	0.327922	0.990959	4	18.1937	18.2204	18.1821	18.0156
Q6P4R8	NFRKB_HUMAN	NFRKB	Nuclear factor related to kappa-B-binding protein OS=Homo sapiens OX=9606 GN=NFRKB PE=1 SV=2	139.001	1299	1.07786	0.108166	0.479307	0.990959	4	18.6105	18.3799	18.3377	18.4363
Q17RY0	CPEB4_HUMAN	CPEB4	Cytoplasmic polyadenylation element-binding protein 4 OS=Homo sapiens OX=9606 GN=CPEB4 PE=1 SV=1	80.152	729	1.07766	0.107908	0.490316	0.990959	4	17.7682	18.0207	17.7611	17.812
O15530	PDPK1_HUMAN	PDPK1	3-phosphoinositide-dependent protein kinase 1 OS=Homo sapiens OX=9606 GN=PDPK1 PE=1 SV=1	63.152	556	1.07766	0.107903	0.614005	0.990959	4	19.2326	19.0822	18.8833	19.2156
Q8IXH7	NELFD_HUMAN	NELFCD	Negative elongation factor C/D OS=Homo sapiens OX=9606 GN=NELFCD PE=1 SV=2	66.247	590	1.07757	0.107785	0.0419193	0.990959	4	20.7969	20.7963	20.7116	20.666
Q86YV9	HPS6_HUMAN	HPS6	Hermansky-Pudlak syndrome 6 protein OS=Homo sapiens OX=9606 GN=HPS6 PE=1 SV=1	82.975	775	1.07755	0.107754	0.44161	0.990959	4	19.38	19.3085	19.1291	19.3439
Q15057	ACAP2_HUMAN	ACAP2	Arf-GAP with coiled-coil, ANK repeat and PH domain-containing protein 2 OS=Homo sapiens OX=9606 GN=ACAP2 PE=1 SV=3	88.029	778	1.07752	0.10772	0.173877	0.990959	4	18.5743	18.618	18.4413	18.5356
P09661	RU2A_HUMAN	SNRPA1	U2 small nuclear ribonucleoprotein A' OS=Homo sapiens OX=9606 GN=SNRPA1 PE=1 SV=2	28.416	255	1.0775	0.107688	0.41845	0.990959	4	23.1769	23.157	22.9532	23.1653
P22830	HEMH_HUMAN	FECH	Ferrochelatase, mitochondrial OS=Homo sapiens OX=9606 GN=FECH PE=1 SV=2	47.862	423	1.07742	0.107587	0.37037	0.990959	4	19.4511	19.3438	19.2128	19.3669
P15291	B4GT1_HUMAN	B4GALT1	Beta-1,4-galactosyltransferase 1 OS=Homo sapiens OX=9606 GN=B4GALT1 PE=1 SV=5	43.92	398	1.07742	0.107577	0.569109	0.990959	4	22.2049	21.9561	21.8734	22.0725
Q6ZRS2	SRCAP_HUMAN	SRCAP	Helicase SRCAP OS=Homo sapiens OX=9606 GN=SRCAP PE=1 SV=3	343.555	3230	1.07741	0.107567	0.0557255	0.990959	4	19.4109	19.3814	19.2666	19.3107
Q9C0E8	LNP_HUMAN	LNPK	Endoplasmic reticulum junction formation protein lunapark OS=Homo sapiens OX=9606 GN=LNPK PE=1 SV=2	47.74	428	1.0774	0.107549	0.406901	0.990959	4	19.4391	19.6191	19.3709	19.4722
Q13424	SNTA1_HUMAN	SNTA1	Alpha-1-syntrophin OS=Homo sapiens OX=9606 GN=SNTA1 PE=1 SV=1	53.895	505	1.07734	0.10748	0.474313	0.990959	4	19.1494	18.9772	19.0436	18.868
Q12846	STX4_HUMAN	STX4	Syntaxin-4 OS=Homo sapiens OX=9606 GN=STX4 PE=1 SV=2	34.18	297	1.07733	0.107465	0.656137	0.990959	4	20.4119	20.0091	20.1529	20.0531
Q6NVY1	HIBCH_HUMAN	HIBCH	3-hydroxyisobutyryl-CoA hydrolase, mitochondrial OS=Homo sapiens OX=9606 GN=HIBCH PE=1 SV=2	43.482	386	1.07728	0.107398	0.356818	0.990959	4	19.4134	19.4373	19.2284	19.4076
Q13415	ORC1_HUMAN	ORC1	Origin recognition complex subunit 1 OS=Homo sapiens OX=9606 GN=ORC1 PE=1 SV=2	97.35	861	1.07721	0.107301	0.569875	0.990959	4	18.9168	18.8262	18.6115	18.9168
O95777	LSM8_HUMAN	LSM8	U6 snRNA-associated Sm-like protein LSm8 OS=Homo sapiens OX=9606 GN=LSM8 PE=1 SV=3	10.403	96	1.07709	0.107141	0.28862	0.990959	4	22.249	22.2707	22.0787	22.2268
P35249	RFC4_HUMAN	RFC4	Replication factor C subunit 4 OS=Homo sapiens OX=9606 GN=RFC4 PE=1 SV=2	39.682	363	1.07699	0.107004	0.35208	0.990959	4	21.6993	21.7655	21.5429	21.708
Q15119	PDK2_HUMAN	PDK2	[Pyruvate dehydrogenase (acetyl-transferring)] kinase isozyme 2, mitochondrial OS=Homo sapiens OX=9606 GN=PDK2 PE=1 SV=2	46.154	407	1.07699	0.106998	0.875042	0.998138	4	17.467	18.4077	17.4567	18.204
Q6DN90	IQEC1_HUMAN	IQSEC1	IQ motif and SEC7 domain-containing protein 1 OS=Homo sapiens OX=9606 GN=IQSEC1 PE=1 SV=1	108.314	963	1.07698	0.106991	0.795567	0.993107	4	17.3635	16.8622	17.2674	16.7443
Q9UK23	NAGPA_HUMAN	NAGPA	N-acetylglucosamine-1-phosphodiester alpha-N-acetylglucosaminidase OS=Homo sapiens OX=9606 GN=NAGPA PE=1 SV=2	56.073	515	1.07696	0.106965	0.0952907	0.990959	4	18.3751	18.3216	18.2178	18.2649
Q5W0V3	F16B1_HUMAN	FAM160B1	Protein FAM160B1 OS=Homo sapiens OX=9606 GN=FAM160B1 PE=1 SV=1	86.558	765	1.07692	0.106912	0.0479515	0.990959	4	18.367	18.3209	18.2293	18.2448
P68366	TBA4A_HUMAN	TUBA4A	Tubulin alpha-4A chain OS=Homo sapiens OX=9606 GN=TUBA4A PE=1 SV=1	49.924	448	1.07684	0.106801	0.552762	0.990959	4	22.9598	23.0014	22.7242	23.0234
Q9NNW7	TRXR2_HUMAN	TXNRD2	Thioredoxin reductase 2, mitochondrial OS=Homo sapiens OX=9606 GN=TXNRD2 PE=1 SV=3	56.507	524	1.07678	0.106728	0.00487798	0.990959	4	19.4548	19.4524	19.3395	19.3542
Q9Y485	DMXL1_HUMAN	DMXL1	DmX-like protein 1 OS=Homo sapiens OX=9606 GN=DMXL1 PE=1 SV=3	337.839	3027	1.07673	0.106652	0.74485	0.990959	4	16.8486	16.5863	16.8647	16.3569
Q9Y4B5	MTCL1_HUMAN	MTCL1	Microtubule cross-linking factor 1 OS=Homo sapiens OX=9606 GN=MTCL1 PE=1 SV=5	209.526	1905	1.07661	0.106497	0.680682	0.990959	4	17.2232	16.8793	17.0875	16.802
Q9BW61	DDA1_HUMAN	DDA1	DET1- and DDB1-associated protein 1 OS=Homo sapiens OX=9606 GN=DDA1 PE=1 SV=1	11.835	102	1.07652	0.106381	0.482536	0.990959	4	20.0477	20.1368	19.8697	20.102
P10696	PPBN_HUMAN	ALPG	Alkaline phosphatase, germ cell type OS=Homo sapiens OX=9606 GN=ALPG PE=2 SV=4	57.377	532	1.07646	0.106295	0.167282	0.990959	4	19.0717	18.9717	18.9155	18.9153
Q07020	RL18_HUMAN	RPL18	60S ribosomal protein L18 OS=Homo sapiens OX=9606 GN=RPL18 PE=1 SV=2	21.634	188	1.07644	0.106273	0.22642	0.990959	4	26.1956	26.1611	26.1312	26.013
O43464	HTRA2_HUMAN	HTRA2	Serine protease HTRA2, mitochondrial OS=Homo sapiens OX=9606 GN=HTRA2 PE=1 SV=2	48.841	458	1.07641	0.106225	0.0268479	0.990959	4	20.0157	19.9879	19.9067	19.8846
P16298	PP2BB_HUMAN	PPP3CB	Serine/threonine-protein phosphatase 2B catalytic subunit beta isoform OS=Homo sapiens OX=9606 GN=PPP3CB PE=1 SV=2	59.024	524	1.07638	0.106183	0.657985	0.990959	4	18.4575	18.8553	18.4953	18.6051
P62750	RL23A_HUMAN	RPL23A	60S ribosomal protein L23a OS=Homo sapiens OX=9606 GN=RPL23A PE=1 SV=1	17.695	156	1.07633	0.106123	0.173226	0.990959	4	24.9948	24.9679	24.9245	24.826
Q6NUQ4	TM214_HUMAN	TMEM214	Transmembrane protein 214 OS=Homo sapiens OX=9606 GN=TMEM214 PE=1 SV=2	77.151	689	1.07627	0.106037	0.0083531	0.990959	4	20.7079	20.689	20.5902	20.5947
P47736	RPGP1_HUMAN	RAP1GAP	Rap1 GTPase-activating protein 1 OS=Homo sapiens OX=9606 GN=RAP1GAP PE=1 SV=2	73.361	663	1.0762	0.105947	0.532695	0.990959	4	17.6721	17.73	17.7338	17.4564
P53365	ARFP2_HUMAN	ARFIP2	Arfaptin-2 OS=Homo sapiens OX=9606 GN=ARFIP2 PE=1 SV=1	37.856	341	1.0761	0.105817	0.495697	0.990959	4	21.4967	21.6893	21.4026	21.5717
Q9NRH2	SNRK_HUMAN	SNRK	SNF-related serine/threonine-protein kinase OS=Homo sapiens OX=9606 GN=SNRK PE=1 SV=2	84.276	765	1.07597	0.105633	0.802423	0.993107	4	16.1028	16.7759	16.4889	16.1786
Q02388	CO7A1_HUMAN	COL7A1	Collagen alpha-1(VII) chain OS=Homo sapiens OX=9606 GN=COL7A1 PE=1 SV=2	295.22	2944	1.07588	0.105517	0.496014	0.990959	4	18.2224	18.0169	18.0903	17.938
P33316	DUT_HUMAN	DUT	Deoxyuridine 5'-triphosphate nucleotidohydrolase, mitochondrial OS=Homo sapiens OX=9606 GN=DUT PE=1 SV=4	26.563	252	1.07581	0.105429	0.644932	0.990959	4	22.731	22.7309	22.4292	22.8218
P78330	SERB_HUMAN	PSPH	Phosphoserine phosphatase OS=Homo sapiens OX=9606 GN=PSPH PE=1 SV=2	25.008	225	1.07575	0.105339	0.40546	0.990959	4	22.0588	22.119	21.8874	22.0797
Q15758	AAAT_HUMAN	SLC1A5	Neutral amino acid transporter B(0) OS=Homo sapiens OX=9606 GN=SLC1A5 PE=1 SV=2	56.598	541	1.07574	0.105329	0.407224	0.990959	4	24.4662	24.3992	24.2319	24.4228
Q9NVP1	DDX18_HUMAN	DDX18	ATP-dependent RNA helicase DDX18 OS=Homo sapiens OX=9606 GN=DDX18 PE=1 SV=2	75.407	670	1.07572	0.105305	0.0279275	0.990959	4	23.2867	23.3125	23.1818	23.2068
Q8NCJ5	SPRY3_HUMAN	SPRYD3	SPRY domain-containing protein 3 OS=Homo sapiens OX=9606 GN=SPRYD3 PE=1 SV=2	49.694	442	1.07571	0.105292	0.363738	0.990959	4	18.6538	18.5095	18.4221	18.5306
O60504	VINEX_HUMAN	SORBS3	Vinexin OS=Homo sapiens OX=9606 GN=SORBS3 PE=1 SV=2	75.341	671	1.07571	0.105288	0.0327598	0.990959	4	19.9087	19.9471	19.8263	19.8189
Q6P5Z2	PKN3_HUMAN	PKN3	Serine/threonine-protein kinase N3 OS=Homo sapiens OX=9606 GN=PKN3 PE=1 SV=1	99.421	889	1.07569	0.105267	0.568912	0.990959	4	18.3297	18.4086	18.1131	18.4146
Q86YS6	RAB43_HUMAN	RAB43	Ras-related protein Rab-43 OS=Homo sapiens OX=9606 GN=RAB43 PE=1 SV=1	23.339	212	1.07568	0.105255	0.730302	0.990959	4	17.4937	17.4925	17.6536	17.1221
Q8IV38	ANKY2_HUMAN	ANKMY2	Ankyrin repeat and MYND domain-containing protein 2 OS=Homo sapiens OX=9606 GN=ANKMY2 PE=1 SV=1	49.299	441	1.07555	0.105077	0.734569	0.990959	4	18.3754	18.8791	18.4252	18.6191
Q96F25	ALG14_HUMAN	ALG14	UDP-N-acetylglucosamine transferase subunit ALG14 homolog OS=Homo sapiens OX=9606 GN=ALG14 PE=1 SV=1	24.151	216	1.07537	0.104827	0.682442	0.990959	4	17.5685	17.1278	17.2646	17.2221
Q9H1E5	TMX4_HUMAN	TMX4	Thioredoxin-related transmembrane protein 4 OS=Homo sapiens OX=9606 GN=TMX4 PE=1 SV=1	38.952	349	1.0753	0.10474	0.345489	0.990959	4	19.3011	19.4152	19.1896	19.3171
Q4LE39	ARI4B_HUMAN	ARID4B	AT-rich interactive domain-containing protein 4B OS=Homo sapiens OX=9606 GN=ARID4B PE=1 SV=2	147.809	1312	1.07524	0.104654	0.265562	0.990959	4	18.5241	18.6594	18.4768	18.4974
Q9UNI6	DUS12_HUMAN	DUSP12	Dual specificity protein phosphatase 12 OS=Homo sapiens OX=9606 GN=DUSP12 PE=1 SV=1	37.687	340	1.07522	0.10463	0.275744	0.990959	4	21.9237	21.8023	21.7226	21.7941
P35052	GPC1_HUMAN	GPC1	Glypican-1 OS=Homo sapiens OX=9606 GN=GPC1 PE=1 SV=2	61.68	558	1.07514	0.104524	0.372588	0.990959	4	18.7254	18.676	18.5078	18.6845
P49005	DPOD2_HUMAN	POLD2	DNA polymerase delta subunit 2 OS=Homo sapiens OX=9606 GN=POLD2 PE=1 SV=1	51.289	469	1.07506	0.104424	0.308929	0.990959	4	19.874	19.9413	19.8727	19.7337
P56378	ATP68_HUMAN	ATP5MPL	ATP synthase subunit ATP5MPL, mitochondrial OS=Homo sapiens OX=9606 GN=ATP5MPL PE=1 SV=1	6.662	58	1.07505	0.104408	0.425652	0.990959	4	20.5606	20.7701	20.5508	20.5711
Q76FK4	NOL8_HUMAN	NOL8	Nucleolar protein 8 OS=Homo sapiens OX=9606 GN=NOL8 PE=1 SV=1	131.616	1167	1.0749	0.104201	0.0940866	0.990959	4	19.9102	19.8425	19.7658	19.7785
Q15910	EZH2_HUMAN	EZH2	Histone-lysine N-methyltransferase EZH2 OS=Homo sapiens OX=9606 GN=EZH2 PE=1 SV=2	85.363	746	1.07485	0.10414	0.26076	0.990959	4	18.9105	19.0414	18.8864	18.8572
P16422	EPCAM_HUMAN	EPCAM	Epithelial cell adhesion molecule OS=Homo sapiens OX=9606 GN=EPCAM PE=1 SV=2	34.932	314	1.07484	0.104116	0.858598	0.998138	4	18.0995	17.1015	17.6253	17.3675
Q9HB58	SP110_HUMAN	SP110	Sp110 nuclear body protein OS=Homo sapiens OX=9606 GN=SP110 PE=1 SV=5	78.396	689	1.07471	0.103943	0.47897	0.990959	4	16.527	16.3854	16.2548	16.4496
Q99871	HAUS7_HUMAN	HAUS7	HAUS augmin-like complex subunit 7 OS=Homo sapiens OX=9606 GN=HAUS7 PE=1 SV=3	40.778	368	1.07466	0.10388	0.570148	0.990959	4	17.7435	17.555	17.6675	17.4232
Q96J02	ITCH_HUMAN	ITCH	E3 ubiquitin-protein ligase Itchy homolog OS=Homo sapiens OX=9606 GN=ITCH PE=1 SV=2	102.803	903	1.07465	0.103871	0.00793098	0.990959	4	19.3622	19.3552	19.2462	19.2635
Q8NDV7	TNR6A_HUMAN	TNRC6A	Trinucleotide repeat-containing gene 6A protein OS=Homo sapiens OX=9606 GN=TNRC6A PE=1 SV=2	210.297	1962	1.07463	0.103841	0.308601	0.990959	4	17.6043	17.4786	17.4816	17.3936
O00400	ACATN_HUMAN	SLC33A1	Acetyl-coenzyme A transporter 1 OS=Homo sapiens OX=9606 GN=SLC33A1 PE=1 SV=1	60.909	549	1.07458	0.103774	0.748562	0.990959	4	19.4938	19.8573	19.3556	19.788
Q9H9Y6	RPA2_HUMAN	POLR1B	DNA-directed RNA polymerase I subunit RPA2 OS=Homo sapiens OX=9606 GN=POLR1B PE=1 SV=2	128.229	1135	1.07452	0.103688	0.180885	0.990959	4	20.501	20.5873	20.4127	20.4682
Q9C0E2	XPO4_HUMAN	XPO4	Exportin-4 OS=Homo sapiens OX=9606 GN=XPO4 PE=1 SV=2	130.139	1151	1.0745	0.103667	0.0558294	0.990959	4	19.3868	19.373	19.2516	19.3009
Q9H3F6	BACD3_HUMAN	KCTD10	BTB/POZ domain-containing adapter for CUL3-mediated RhoA degradation protein 3 OS=Homo sapiens OX=9606 GN=KCTD10 PE=1 SV=1	35.432	313	1.07448	0.103633	0.112406	0.990959	4	19.4945	19.474	19.344	19.4172
Q96JN8	NEUL4_HUMAN	NEURL4	Neuralized-like protein 4 OS=Homo sapiens OX=9606 GN=NEURL4 PE=1 SV=2	166.907	1562	1.07446	0.103614	0.383435	0.990959	4	17.9118	17.7788	17.6759	17.8075
Q96DF8	ESS2_HUMAN	ESS2	Splicing factor ESS-2 homolog OS=Homo sapiens OX=9606 GN=ESS2 PE=1 SV=1	52.568	476	1.07444	0.103582	0.00320021	0.823132	4	19.1177	19.1061	19.0093	19.0073
Q96BZ8	LENG1_HUMAN	LENG1	Leukocyte receptor cluster member 1 OS=Homo sapiens OX=9606 GN=LENG1 PE=1 SV=1	30.529	264	1.07441	0.103547	0.507844	0.990959	4	18.7138	18.8576	18.5744	18.7898
Q3ZCW2	LEGL_HUMAN	LGALSL	Galectin-related protein OS=Homo sapiens OX=9606 GN=LGALSL PE=1 SV=2	18.986	172	1.07434	0.103444	0.794746	0.993107	4	19.7374	19.8854	19.3671	20.0488
Q96S82	UBL7_HUMAN	UBL7	Ubiquitin-like protein 7 OS=Homo sapiens OX=9606 GN=UBL7 PE=1 SV=2	40.51	380	1.07433	0.103438	0.477615	0.990959	4	19.7668	19.5614	19.6215	19.4997
P25787	PSA2_HUMAN	PSMA2	Proteasome subunit alpha type-2 OS=Homo sapiens OX=9606 GN=PSMA2 PE=1 SV=2	25.899	234	1.07424	0.103319	0.779174	0.993107	4	22.3774	22.6031	22.0847	22.6892
Q9UI30	TR112_HUMAN	TRMT112	Multifunctional methyltransferase subunit TRM112-like protein OS=Homo sapiens OX=9606 GN=TRMT112 PE=1 SV=1	14.199	125	1.0742	0.103268	0.318676	0.990959	4	23.0803	23.2243	23.0801	23.0179
Q9Y289	SC5A6_HUMAN	SLC5A6	Sodium-dependent multivitamin transporter OS=Homo sapiens OX=9606 GN=SLC5A6 PE=2 SV=2	68.642	635	1.07396	0.102941	0.255268	0.990959	4	19.8618	19.8044	19.6716	19.7887
P04183	KITH_HUMAN	TK1	Thymidine kinase, cytosolic OS=Homo sapiens OX=9606 GN=TK1 PE=1 SV=2	25.469	234	1.07389	0.102845	0.59731	0.990959	4	20.714	21.0446	20.778	20.7749
Q15819	UB2V2_HUMAN	UBE2V2	Ubiquitin-conjugating enzyme E2 variant 2 OS=Homo sapiens OX=9606 GN=UBE2V2 PE=1 SV=4	16.363	145	1.07382	0.102753	0.50321	0.990959	4	24.8965	24.8675	24.6531	24.9053
Q9BRR8	GPTC1_HUMAN	GPATCH1	G patch domain-containing protein 1 OS=Homo sapiens OX=9606 GN=GPATCH1 PE=1 SV=1	103.345	931	1.07379	0.102709	0.88063	0.998138	4	15.4802	15.5848	16.0316	14.828
P49736	MCM2_HUMAN	MCM2	DNA replication licensing factor MCM2 OS=Homo sapiens OX=9606 GN=MCM2 PE=1 SV=4	101.896	904	1.07375	0.102659	0.358442	0.990959	4	22.7411	22.7343	22.5483	22.7218
P54132	BLM_HUMAN	BLM	Bloom syndrome protein OS=Homo sapiens OX=9606 GN=BLM PE=1 SV=1	159	1417	1.07373	0.102629	0.293832	0.990959	4	17.8406	17.8789	17.8273	17.6869
Q96R06	SPAG5_HUMAN	SPAG5	Sperm-associated antigen 5 OS=Homo sapiens OX=9606 GN=SPAG5 PE=1 SV=2	134.422	1193	1.07371	0.1026	0.204148	0.990959	4	20.0413	20.0494	19.9978	19.8877
P60903	S10AA_HUMAN	S100A10	Protein S100-A10 OS=Homo sapiens OX=9606 GN=S100A10 PE=1 SV=2	11.203	97	1.07361	0.102473	0.563389	0.990959	4	25.4899	25.6718	25.3599	25.5968
Q6PCT2	FXL19_HUMAN	FBXL19	F-box/LRR-repeat protein 19 OS=Homo sapiens OX=9606 GN=FBXL19 PE=1 SV=3	75.707	694	1.07361	0.10247	0.3595	0.990959	4	17.0095	17.1208	17.0294	16.896
P01023	A2MG_HUMAN	A2M	Alpha-2-macroglobulin OS=Homo sapiens OX=9606 GN=A2M PE=1 SV=3	163.291	1474	1.07351	0.102333	0.718065	0.990959	4	20.9637	20.9614	20.614	21.1065
P49711	CTCF_HUMAN	CTCF	Transcriptional repressor CTCF OS=Homo sapiens OX=9606 GN=CTCF PE=1 SV=1	82.785	727	1.07346	0.102272	0.625902	0.990959	4	19.3905	19.7393	19.5042	19.4211
Q8TAD8	SNIP1_HUMAN	SNIP1	Smad nuclear-interacting protein 1 OS=Homo sapiens OX=9606 GN=SNIP1 PE=1 SV=1	45.778	396	1.0734	0.102189	0.110543	0.990959	4	19.7895	19.7399	19.6901	19.6349
Q8NHG8	ZNRF2_HUMAN	ZNRF2	E3 ubiquitin-protein ligase ZNRF2 OS=Homo sapiens OX=9606 GN=ZNRF2 PE=1 SV=1	24.115	242	1.07316	0.101863	0.823335	0.993107	4	17.9617	17.9448	18.2526	17.4502
Q9P2T1	GMPR2_HUMAN	GMPR2	GMP reductase 2 OS=Homo sapiens OX=9606 GN=GMPR2 PE=1 SV=1	37.874	348	1.07304	0.101705	0.189251	0.990959	4	19.1104	19.1438	18.9762	19.0746
Q9ULX3	NOB1_HUMAN	NOB1	RNA-binding protein NOB1 OS=Homo sapiens OX=9606 GN=NOB1 PE=1 SV=1	46.675	412	1.07289	0.101506	0.519956	0.990959	4	22.136	21.8745	21.8934	21.914
O95232	LC7L3_HUMAN	LUC7L3	Luc7-like protein 3 OS=Homo sapiens OX=9606 GN=LUC7L3 PE=1 SV=2	51.466	432	1.07286	0.101465	0.361645	0.990959	4	20.9565	21.0823	20.8585	20.9773
Q8IYI6	EXOC8_HUMAN	EXOC8	Exocyst complex component 8 OS=Homo sapiens OX=9606 GN=EXOC8 PE=1 SV=2	81.799	725	1.0728	0.101378	0.00233311	0.808889	4	19.2128	19.2219	19.1178	19.1142
P24592	IBP6_HUMAN	IGFBP6	Insulin-like growth factor-binding protein 6 OS=Homo sapiens OX=9606 GN=IGFBP6 PE=1 SV=1	25.322	240	1.07265	0.101181	0.252067	0.990959	4	18.0725	18.1175	18.0532	17.9345
Q99733	NP1L4_HUMAN	NAP1L4	Nucleosome assembly protein 1-like 4 OS=Homo sapiens OX=9606 GN=NAP1L4 PE=1 SV=1	42.823	375	1.07263	0.101152	0.595788	0.990959	4	23.8917	23.8548	23.6113	23.9329
O15119	TBX3_HUMAN	TBX3	T-box transcription factor TBX3 OS=Homo sapiens OX=9606 GN=TBX3 PE=1 SV=4	79.389	743	1.07258	0.101089	0.0907118	0.990959	4	17.6863	17.6418	17.5389	17.5869
Q96KM6	Z512B_HUMAN	ZNF512B	Zinc finger protein 512B OS=Homo sapiens OX=9606 GN=ZNF512B PE=1 SV=1	97.264	892	1.07258	0.101087	0.159304	0.990959	4	17.7703	17.7853	17.6313	17.7222
Q9H3S4	TPK1_HUMAN	TPK1	Thiamin pyrophosphokinase 1 OS=Homo sapiens OX=9606 GN=TPK1 PE=1 SV=1	27.265	243	1.07248	0.100956	0.790495	0.993107	4	18.685	18.1721	18.1149	18.5403
Q8ND04	SMG8_HUMAN	SMG8	Protein SMG8 OS=Homo sapiens OX=9606 GN=SMG8 PE=1 SV=1	109.684	991	1.07247	0.100942	0.228617	0.990959	4	19.8683	19.8468	19.8145	19.6987
Q9HCS5	E41LA_HUMAN	EPB41L4A	Band 4.1-like protein 4A OS=Homo sapiens OX=9606 GN=EPB41L4A PE=1 SV=2	79.059	686	1.07235	0.100782	0.657855	0.990959	4	17.0755	17.1969	16.8494	17.2215
Q9BRD0	BUD13_HUMAN	BUD13	BUD13 homolog OS=Homo sapiens OX=9606 GN=BUD13 PE=1 SV=1	70.521	619	1.07232	0.100738	0.482345	0.990959	4	19.3748	19.3846	19.3966	19.1613
Q9UL25	RAB21_HUMAN	RAB21	Ras-related protein Rab-21 OS=Homo sapiens OX=9606 GN=RAB21 PE=1 SV=3	24.348	225	1.07229	0.100699	0.456788	0.990959	4	22.21	22.2846	22.043	22.2501
Q6ZW76	ANKS3_HUMAN	ANKS3	Ankyrin repeat and SAM domain-containing protein 3 OS=Homo sapiens OX=9606 GN=ANKS3 PE=1 SV=1	72.038	656	1.07225	0.100641	0.671436	0.990959	4	18.302	18.3319	18.0123	18.4203
Q9GZT3	SLIRP_HUMAN	SLIRP	SRA stem-loop-interacting RNA-binding protein, mitochondrial OS=Homo sapiens OX=9606 GN=SLIRP PE=1 SV=1	12.349	109	1.07215	0.100512	0.163303	0.990959	4	22.9803	22.9285	22.8152	22.8925
O43826	G6PT1_HUMAN	SLC37A4	Glucose-6-phosphate exchanger SLC37A4 OS=Homo sapiens OX=9606 GN=SLC37A4 PE=1 SV=1	46.36	429	1.07212	0.100467	0.590931	0.990959	4	19.6964	19.5168	19.3755	19.6367
Q9BVK6	TMED9_HUMAN	TMED9	Transmembrane emp24 domain-containing protein 9 OS=Homo sapiens OX=9606 GN=TMED9 PE=1 SV=2	27.277	235	1.07202	0.100334	0.246497	0.990959	4	23.0102	22.9096	22.8235	22.8956
Q8NAN2	MIGA1_HUMAN	MIGA1	Mitoguardin 1 OS=Homo sapiens OX=9606 GN=MIGA1 PE=1 SV=1	71.006	632	1.07201	0.100319	0.476805	0.990959	4	16.6389	16.8624	16.6796	16.6211
Q14103	HNRPD_HUMAN	HNRNPD	Heterogeneous nuclear ribonucleoprotein D0 OS=Homo sapiens OX=9606 GN=HNRNPD PE=1 SV=1	38.434	355	1.072	0.100302	0.273519	0.990959	4	23.1827	23.3061	23.1704	23.1177
Q9NSI2	F207A_HUMAN	FAM207A	Protein FAM207A OS=Homo sapiens OX=9606 GN=FAM207A PE=1 SV=2	25.456	230	1.072	0.100299	0.620722	0.990959	4	20.2041	20.2193	19.9385	20.2843
Q9BQL6	FERM1_HUMAN	FERMT1	Fermitin family homolog 1 OS=Homo sapiens OX=9606 GN=FERMT1 PE=1 SV=1	77.437	677	1.07194	0.100227	0.160018	0.990959	4	20.1233	20.0451	20.0077	19.9602
Q8NF37	PCAT1_HUMAN	LPCAT1	Lysophosphatidylcholine acyltransferase 1 OS=Homo sapiens OX=9606 GN=LPCAT1 PE=1 SV=2	59.151	534	1.07159	0.0997536	0.596911	0.990959	4	20.2534	20.255	19.9943	20.3146
Q86X02	CDR2L_HUMAN	CDR2L	Cerebellar degeneration-related protein 2-like OS=Homo sapiens OX=9606 GN=CDR2L PE=1 SV=2	53.01	465	1.07148	0.0995994	0.0927802	0.990959	4	19.2582	19.1938	19.1209	19.1318
Q9NVJ2	ARL8B_HUMAN	ARL8B	ADP-ribosylation factor-like protein 8B OS=Homo sapiens OX=9606 GN=ARL8B PE=1 SV=1	21.539	186	1.07144	0.0995461	0.274625	0.990959	4	22.7396	22.6964	22.5553	22.6817
Q9H307	PININ_HUMAN	PNN	Pinin OS=Homo sapiens OX=9606 GN=PNN PE=1 SV=5	81.628	717	1.07142	0.0995194	0.0661092	0.990959	4	22.1363	22.1143	22.0012	22.0504
Q9HCN4	GPN1_HUMAN	GPN1	GPN-loop GTPase 1 OS=Homo sapiens OX=9606 GN=GPN1 PE=1 SV=1	41.74	374	1.07141	0.0995168	0.25962	0.990959	4	19.7607	19.8397	19.6505	19.7509
Q6VY07	PACS1_HUMAN	PACS1	Phosphofurin acidic cluster sorting protein 1 OS=Homo sapiens OX=9606 GN=PACS1 PE=1 SV=2	104.898	963	1.07129	0.0993488	0.210235	0.990959	4	20.0792	19.984	19.9056	19.959
Q9UBC3	DNM3B_HUMAN	DNMT3B	DNA (cytosine-5)-methyltransferase 3B OS=Homo sapiens OX=9606 GN=DNMT3B PE=1 SV=1	95.751	853	1.07119	0.0992095	0.794121	0.993107	4	15.389	14.7791	15.1198	14.8499
Q9GZR2	REXO4_HUMAN	REXO4	RNA exonuclease 4 OS=Homo sapiens OX=9606 GN=REXO4 PE=1 SV=2	46.672	422	1.07111	0.0991027	0.0125601	0.990959	4	19.9875	19.9651	19.8779	19.8765
Q96RS6	NUDC1_HUMAN	NUDCD1	NudC domain-containing protein 1 OS=Homo sapiens OX=9606 GN=NUDCD1 PE=1 SV=2	66.756	583	1.07105	0.0990191	0.376609	0.990959	4	21.4863	21.4963	21.3046	21.48
Q8NFD5	ARI1B_HUMAN	ARID1B	AT-rich interactive domain-containing protein 1B OS=Homo sapiens OX=9606 GN=ARID1B PE=1 SV=2	236.123	2236	1.07097	0.0989231	0.265854	0.990959	4	19.46	19.4857	19.4374	19.3106
Q9BW72	HIG2A_HUMAN	HIGD2A	HIG1 domain family member 2A, mitochondrial OS=Homo sapiens OX=9606 GN=HIGD2A PE=1 SV=1	11.529	106	1.07096	0.0989023	0.740375	0.990959	4	19.8805	20.3993	20.0602	20.0218
Q06418	TYRO3_HUMAN	TYRO3	Tyrosine-protein kinase receptor TYRO3 OS=Homo sapiens OX=9606 GN=TYRO3 PE=1 SV=1	96.905	890	1.07096	0.0988995	0.738792	0.990959	4	17.6619	17.5079	17.7327	17.2393
Q8NC54	KCT2_HUMAN	KCT2	Keratinocyte-associated transmembrane protein 2 OS=Homo sapiens OX=9606 GN=KCT2 PE=1 SV=2	29.235	265	1.07094	0.0988726	0.0664153	0.990959	4	20.431	20.4577	20.3222	20.3688
Q9GZR7	DDX24_HUMAN	DDX24	ATP-dependent RNA helicase DDX24 OS=Homo sapiens OX=9606 GN=DDX24 PE=1 SV=1	96.332	859	1.07093	0.0988621	0.30854	0.990959	4	20.5725	20.5575	20.3935	20.5388
Q96C19	EFHD2_HUMAN	EFHD2	EF-hand domain-containing protein D2 OS=Homo sapiens OX=9606 GN=EFHD2 PE=1 SV=1	26.697	240	1.07091	0.098842	0.162779	0.990959	4	21.7053	21.6831	21.5511	21.6396
P35637	FUS_HUMAN	FUS	RNA-binding protein FUS OS=Homo sapiens OX=9606 GN=FUS PE=1 SV=1	53.426	526	1.07088	0.0987935	0.590838	0.990959	4	24.657	24.8213	24.508	24.7727
O75676	KS6A4_HUMAN	RPS6KA4	Ribosomal protein S6 kinase alpha-4 OS=Homo sapiens OX=9606 GN=RPS6KA4 PE=1 SV=1	85.606	772	1.07083	0.0987257	0.0946189	0.990959	4	18.3116	18.3239	18.1869	18.2512
Q13569	TDG_HUMAN	TDG	G/T mismatch-specific thymine DNA glycosylase OS=Homo sapiens OX=9606 GN=TDG PE=1 SV=2	46.053	410	1.07079	0.0986744	0.478178	0.990959	4	17.5495	17.4794	17.3072	17.5243
Q8TB36	GDAP1_HUMAN	GDAP1	Ganglioside-induced differentiation-associated protein 1 OS=Homo sapiens OX=9606 GN=GDAP1 PE=1 SV=3	41.346	358	1.07074	0.0986113	0.249967	0.990959	4	19.0486	19.1037	18.9225	19.0325
Q99538	LGMN_HUMAN	LGMN	Legumain OS=Homo sapiens OX=9606 GN=LGMN PE=1 SV=1	49.411	433	1.07067	0.0985102	0.142323	0.990959	4	19.9921	20.0423	19.8853	19.952
Q9Y375	CIA30_HUMAN	NDUFAF1	Complex I intermediate-associated protein 30, mitochondrial OS=Homo sapiens OX=9606 GN=NDUFAF1 PE=1 SV=2	37.764	327	1.0706	0.0984181	0.323757	0.990959	4	19.3538	19.2034	19.1898	19.1705
Q9UJX2	CDC23_HUMAN	CDC23	Cell division cycle protein 23 homolog OS=Homo sapiens OX=9606 GN=CDC23 PE=1 SV=3	68.834	597	1.07056	0.0983698	0.0817671	0.990959	4	19.5471	19.579	19.4393	19.4901
Q9NR77	PXMP2_HUMAN	PXMP2	Peroxisomal membrane protein 2 OS=Homo sapiens OX=9606 GN=PXMP2 PE=1 SV=3	22.253	195	1.07056	0.0983653	0.721617	0.990959	4	19.5464	19.6688	19.2772	19.7413
P43034	LIS1_HUMAN	PAFAH1B1	Platelet-activating factor acetylhydrolase IB subunit beta OS=Homo sapiens OX=9606 GN=PAFAH1B1 PE=1 SV=2	46.638	410	1.0705	0.0982813	0.487705	0.990959	4	21.6343	21.805	21.542	21.7006
Q99961	SH3G1_HUMAN	SH3GL1	Endophilin-A2 OS=Homo sapiens OX=9606 GN=SH3GL1 PE=1 SV=1	41.49	368	1.07049	0.0982735	0.390114	0.990959	4	20.8917	20.7899	20.6679	20.8171
Q9H3Z4	DNJC5_HUMAN	DNAJC5	DnaJ homolog subfamily C member 5 OS=Homo sapiens OX=9606 GN=DNAJC5 PE=1 SV=1	22.149	198	1.07032	0.0980374	0.366672	0.990959	4	17.9384	17.8083	17.8296	17.721
P05187	PPB1_HUMAN	ALPP	Alkaline phosphatase, placental type OS=Homo sapiens OX=9606 GN=ALPP PE=1 SV=2	57.954	535	1.07031	0.0980299	0.599926	0.990959	4	21.6482	21.7847	21.4751	21.7618
Q9H871	RMD5A_HUMAN	RMND5A	E3 ubiquitin-protein transferase RMND5A OS=Homo sapiens OX=9606 GN=RMND5A PE=1 SV=1	43.993	391	1.07029	0.0980079	0.411779	0.990959	4	19.4076	19.5869	19.4315	19.367
P57088	TMM33_HUMAN	TMEM33	Transmembrane protein 33 OS=Homo sapiens OX=9606 GN=TMEM33 PE=1 SV=2	27.978	247	1.07011	0.0977546	0.0523302	0.990959	4	22.8529	22.8852	22.7881	22.7546
P55017	S12A3_HUMAN	SLC12A3	Solute carrier family 12 member 3 OS=Homo sapiens OX=9606 GN=SLC12A3 PE=1 SV=3	113.139	1021	1.07007	0.0977012	0.0245325	0.990959	4	16.3842	16.3744	16.2964	16.2668
P62253	UB2G1_HUMAN	UBE2G1	Ubiquitin-conjugating enzyme E2 G1 OS=Homo sapiens OX=9606 GN=UBE2G1 PE=1 SV=3	19.509	170	1.07005	0.0976808	0.644344	0.990959	4	20.7158	20.4758	20.3619	20.6343
Q9C004	SPY4_HUMAN	SPRY4	Protein sprouty homolog 4 OS=Homo sapiens OX=9606 GN=SPRY4 PE=1 SV=2	32.541	299	1.06996	0.0975586	0.379536	0.990959	4	17.6737	17.7632	17.5461	17.6957
Q14814	MEF2D_HUMAN	MEF2D	Myocyte-specific enhancer factor 2D OS=Homo sapiens OX=9606 GN=MEF2D PE=1 SV=1	55.938	521	1.06995	0.0975399	0.144997	0.990959	4	19.7529	19.7633	19.619	19.7021
O95365	ZBT7A_HUMAN	ZBTB7A	Zinc finger and BTB domain-containing protein 7A OS=Homo sapiens OX=9606 GN=ZBTB7A PE=1 SV=1	61.439	584	1.0699	0.0974752	0.659423	0.990959	4	17.1339	17.3594	17.3024	16.9959
O14965	AURKA_HUMAN	AURKA	Aurora kinase A OS=Homo sapiens OX=9606 GN=AURKA PE=1 SV=2	45.809	403	1.06986	0.0974158	0.333084	0.990959	4	19.4945	19.6223	19.5039	19.4181
Q6YBV0	S36A4_HUMAN	SLC36A4	Proton-coupled amino acid transporter 4 OS=Homo sapiens OX=9606 GN=SLC36A4 PE=1 SV=1	56.157	504	1.06985	0.0974025	0.905099	1	4	16.19	15.7911	15.1987	16.5875
O00512	BCL9_HUMAN	BCL9	B-cell CLL/lymphoma 9 protein OS=Homo sapiens OX=9606 GN=BCL9 PE=1 SV=4	149.29	1426	1.06985	0.0974019	0.367052	0.990959	4	17.2545	17.1773	17.0436	17.1934
Q9BZ29	DOCK9_HUMAN	DOCK9	Dedicator of cytokinesis protein 9 OS=Homo sapiens OX=9606 GN=DOCK9 PE=1 SV=2	236.446	2069	1.06979	0.0973283	0.486195	0.990959	4	18.338	18.1357	18.0849	18.194
Q9UK76	JUPI1_HUMAN	JPT1	Jupiter microtubule associated homolog 1 OS=Homo sapiens OX=9606 GN=JPT1 PE=1 SV=3	16.015	154	1.06976	0.0972902	0.385576	0.990959	4	22.3032	22.1643	22.0818	22.1911
Q9NR19	ACSA_HUMAN	ACSS2	Acetyl-coenzyme A synthetase, cytoplasmic OS=Homo sapiens OX=9606 GN=ACSS2 PE=1 SV=1	78.58	701	1.06969	0.0971928	0.176588	0.990959	4	19.397	19.4356	19.2758	19.3623
P14618	KPYM_HUMAN	PKM	Pyruvate kinase PKM OS=Homo sapiens OX=9606 GN=PKM PE=1 SV=4	57.937	531	1.06964	0.0971303	0.547073	0.990959	4	27.3419	27.4051	27.1449	27.4078
Q9UN81	LORF1_HUMAN	L1RE1	LINE-1 retrotransposable element ORF1 protein OS=Homo sapiens OX=9606 GN=L1RE1 PE=1 SV=1	40.056	338	1.06951	0.0969495	0.714838	0.990959	4	16.7205	16.5592	16.7587	16.327
O75935	DCTN3_HUMAN	DCTN3	Dynactin subunit 3 OS=Homo sapiens OX=9606 GN=DCTN3 PE=1 SV=1	21.119	186	1.0695	0.0969298	0.489287	0.990959	4	20.264	20.2442	20.0422	20.2722
Q7L3T8	SYPM_HUMAN	PARS2	Probable proline--tRNA ligase, mitochondrial OS=Homo sapiens OX=9606 GN=PARS2 PE=1 SV=1	53.263	475	1.06936	0.0967517	0.731694	0.990959	4	17.7326	17.9627	17.5338	17.9679
Q9BV73	CP250_HUMAN	CEP250	Centrosome-associated protein CEP250 OS=Homo sapiens OX=9606 GN=CEP250 PE=1 SV=2	281.137	2442	1.06917	0.0964868	0.297163	0.990959	4	19.0762	19.0777	19.0495	18.9114
Q9Y4R8	TELO2_HUMAN	TELO2	Telomere length regulation protein TEL2 homolog OS=Homo sapiens OX=9606 GN=TELO2 PE=1 SV=2	91.747	837	1.06916	0.096482	0.508218	0.990959	4	20.3709	20.394	20.1658	20.4062
P52815	RM12_HUMAN	MRPL12	39S ribosomal protein L12, mitochondrial OS=Homo sapiens OX=9606 GN=MRPL12 PE=1 SV=2	21.348	198	1.06908	0.0963686	0.543252	0.990959	4	23.1707	23.0988	22.9106	23.1661
P15151	PVR_HUMAN	PVR	Poliovirus receptor OS=Homo sapiens OX=9606 GN=PVR PE=1 SV=2	45.303	417	1.06904	0.0963147	0.209761	0.990959	4	20.7113	20.6058	20.5606	20.5639
P37275	ZEB1_HUMAN	ZEB1	Zinc finger E-box-binding homeobox 1 OS=Homo sapiens OX=9606 GN=ZEB1 PE=1 SV=2	124.074	1124	1.069	0.0962584	0.50089	0.990959	4	17.0649	16.8855	16.802	16.9559
Q86XP1	DGKH_HUMAN	DGKH	Diacylglycerol kinase eta OS=Homo sapiens OX=9606 GN=DGKH PE=1 SV=1	134.866	1220	1.06899	0.0962525	0.630721	0.990959	4	16.6013	16.9008	16.5716	16.738
Q15477	SKIV2_HUMAN	SKIV2L	Helicase SKI2W OS=Homo sapiens OX=9606 GN=SKIV2L PE=1 SV=3	137.755	1246	1.06897	0.0962149	0.39632	0.990959	4	19.2822	19.2927	19.2809	19.1015
Q04864	REL_HUMAN	REL	Proto-oncogene c-Rel OS=Homo sapiens OX=9606 GN=REL PE=1 SV=1	68.52	619	1.06893	0.0961644	0.720168	0.990959	4	17.6881	17.9419	17.9146	17.5231
Q9NR45	SIAS_HUMAN	NANS	Sialic acid synthase OS=Homo sapiens OX=9606 GN=NANS PE=1 SV=2	40.308	359	1.06891	0.0961416	0.365083	0.990959	4	21.9337	22.0761	21.8666	21.9509
Q00537	CDK17_HUMAN	CDK17	Cyclin-dependent kinase 17 OS=Homo sapiens OX=9606 GN=CDK17 PE=1 SV=2	59.582	523	1.06885	0.0960613	0.264078	0.990959	4	19.4001	19.2978	19.217	19.2888
Q06587	RING1_HUMAN	RING1	E3 ubiquitin-protein ligase RING1 OS=Homo sapiens OX=9606 GN=RING1 PE=1 SV=2	42.429	406	1.06882	0.0960179	0.758332	0.99164	4	19.3861	19.7845	19.3032	19.6754
P45877	PPIC_HUMAN	PPIC	Peptidyl-prolyl cis-trans isomerase C OS=Homo sapiens OX=9606 GN=PPIC PE=1 SV=1	22.763	212	1.06877	0.0959462	0.707669	0.990959	4	19.5137	19.5553	19.6595	19.2176
P26373	RL13_HUMAN	RPL13	60S ribosomal protein L13 OS=Homo sapiens OX=9606 GN=RPL13 PE=1 SV=4	24.261	211	1.06876	0.0959342	0.376465	0.990959	4	25.8839	25.7669	25.6678	25.7913
Q9BT73	PSMG3_HUMAN	PSMG3	Proteasome assembly chaperone 3 OS=Homo sapiens OX=9606 GN=PSMG3 PE=1 SV=1	13.104	122	1.06874	0.0959085	0.543416	0.990959	4	20.7651	20.5902	20.4827	20.6808
Q16514	TAF12_HUMAN	TAF12	Transcription initiation factor TFIID subunit 12 OS=Homo sapiens OX=9606 GN=TAF12 PE=1 SV=1	17.924	161	1.0687	0.0958607	0.355619	0.990959	4	18.9306	18.7708	18.7643	18.7454
Q96DM3	RMC1_HUMAN	RMC1	Regulator of MON1-CCZ1 complex OS=Homo sapiens OX=9606 GN=RMC1 PE=1 SV=2	74.975	657	1.06869	0.0958445	0.755214	0.990959	4	18.3937	17.8847	17.958	18.1287
Q8NA72	POC5_HUMAN	POC5	Centrosomal protein POC5 OS=Homo sapiens OX=9606 GN=POC5 PE=1 SV=2	63.351	575	1.06868	0.0958262	0.508692	0.990959	4	16.547	16.384	16.4579	16.2815
Q8WVJ2	NUDC2_HUMAN	NUDCD2	NudC domain-containing protein 2 OS=Homo sapiens OX=9606 GN=NUDCD2 PE=1 SV=1	17.676	157	1.06854	0.0956363	0.706116	0.990959	4	20.6156	20.7231	20.3604	20.787
Q92576	PHF3_HUMAN	PHF3	PHD finger protein 3 OS=Homo sapiens OX=9606 GN=PHF3 PE=1 SV=3	229.481	2039	1.06852	0.0956204	0.160408	0.990959	4	18.718	18.7231	18.6686	18.5812
P28827	PTPRM_HUMAN	PTPRM	Receptor-type tyrosine-protein phosphatase mu OS=Homo sapiens OX=9606 GN=PTPRM PE=1 SV=2	163.682	1452	1.06847	0.09555	0.654316	0.990959	4	20.4133	20.638	20.2852	20.5751
P11274	BCR_HUMAN	BCR	Breakpoint cluster region protein OS=Homo sapiens OX=9606 GN=BCR PE=1 SV=2	142.819	1271	1.06833	0.0953562	0.414909	0.990959	4	18.1097	18.0273	17.8892	18.057
P42766	RL35_HUMAN	RPL35	60S ribosomal protein L35 OS=Homo sapiens OX=9606 GN=RPL35 PE=1 SV=2	14.551	123	1.06811	0.0950598	0.720764	0.990959	4	25.2482	25.0735	25.2798	24.8518
Q9UM13	APC10_HUMAN	ANAPC10	Anaphase-promoting complex subunit 10 OS=Homo sapiens OX=9606 GN=ANAPC10 PE=1 SV=1	21.252	185	1.06795	0.0948423	0.679856	0.990959	4	18.9391	18.5732	18.5845	18.7381
Q9Y2T3	GUAD_HUMAN	GDA	Guanine deaminase OS=Homo sapiens OX=9606 GN=GDA PE=1 SV=1	51.003	454	1.06792	0.0948018	0.269755	0.990959	4	22.9694	22.9706	22.8125	22.9379
P54252	ATX3_HUMAN	ATXN3	Ataxin-3 OS=Homo sapiens OX=9606 GN=ATXN3 PE=1 SV=5	41.25	361	1.0679	0.094781	0.390643	0.990959	4	18.4169	18.2531	18.2102	18.2702
Q15742	NAB2_HUMAN	NAB2	NGFI-A-binding protein 2 OS=Homo sapiens OX=9606 GN=NAB2 PE=1 SV=1	56.594	525	1.06776	0.0945917	0.0839988	0.990959	4	20.2519	20.2431	20.1239	20.1819
Q9NVH2	INT7_HUMAN	INTS7	Integrator complex subunit 7 OS=Homo sapiens OX=9606 GN=INTS7 PE=1 SV=1	106.834	962	1.06766	0.0944558	0.560292	0.990959	4	19.0139	19.2867	19.0553	19.0563
Q02447	SP3_HUMAN	SP3	Transcription factor Sp3 OS=Homo sapiens OX=9606 GN=SP3 PE=1 SV=3	81.925	781	1.06766	0.0944523	0.640328	0.990959	4	17.227	17.5613	17.3455	17.2539
Q96EB1	ELP4_HUMAN	ELP4	Elongator complex protein 4 OS=Homo sapiens OX=9606 GN=ELP4 PE=1 SV=2	46.588	424	1.06761	0.0943888	0.133758	0.990959	4	18.2616	18.2958	18.2188	18.1498
P0DI81	TPC2A_HUMAN	TRAPPC2	Trafficking protein particle complex subunit 2 OS=Homo sapiens OX=9606 GN=TRAPPC2 PE=1 SV=1	16.445	140	1.06755	0.0942982	0.873269	0.998138	4	17.337	16.2943	16.6976	16.7452
Q8NHQ8	RASF8_HUMAN	RASSF8	Ras association domain-containing protein 8 OS=Homo sapiens OX=9606 GN=RASSF8 PE=1 SV=2	48.327	419	1.06754	0.0942928	0.0157762	0.990959	4	20.415	20.4384	20.3298	20.3351
Q1ED39	KNOP1_HUMAN	KNOP1	Lysine-rich nucleolar protein 1 OS=Homo sapiens OX=9606 GN=KNOP1 PE=1 SV=1	51.589	458	1.06739	0.0940882	0.332646	0.990959	4	21.6494	21.637	21.6231	21.4751
Q9GZT8	NIF3L_HUMAN	NIF3L1	NIF3-like protein 1 OS=Homo sapiens OX=9606 GN=NIF3L1 PE=1 SV=2	41.968	377	1.06737	0.0940595	0.033197	0.990959	4	20.4223	20.4448	20.326	20.353
Q4KMQ1	TPRN_HUMAN	TPRN	Taperin OS=Homo sapiens OX=9606 GN=TPRN PE=1 SV=2	75.556	711	1.06734	0.0940185	0.48815	0.990959	4	18.0967	18.2644	18.1602	18.0129
P23229	ITA6_HUMAN	ITGA6	Integrin alpha-6 OS=Homo sapiens OX=9606 GN=ITGA6 PE=1 SV=5	126.606	1130	1.06732	0.093994	0.488329	0.990959	4	21.6529	21.7278	21.4913	21.7015
P14324	FPPS_HUMAN	FDPS	Farnesyl pyrophosphate synthase OS=Homo sapiens OX=9606 GN=FDPS PE=1 SV=4	48.275	419	1.0673	0.0939656	0.327378	0.990959	4	24.3815	24.3841	24.2157	24.3619
Q13115	DUS4_HUMAN	DUSP4	Dual specificity protein phosphatase 4 OS=Homo sapiens OX=9606 GN=DUSP4 PE=1 SV=1	42.953	394	1.06725	0.0939046	0.189228	0.990959	4	17.7399	17.6849	17.5792	17.6578
Q9BRR6	ADPGK_HUMAN	ADPGK	ADP-dependent glucokinase OS=Homo sapiens OX=9606 GN=ADPGK PE=1 SV=1	54.089	497	1.06725	0.093895	0.534984	0.990959	4	18.8978	18.9811	18.7262	18.9649
Q9H4A6	GOLP3_HUMAN	GOLPH3	Golgi phosphoprotein 3 OS=Homo sapiens OX=9606 GN=GOLPH3 PE=1 SV=1	33.811	298	1.0672	0.0938361	0.584284	0.990959	4	21.9124	22.0731	21.778	22.0198
Q9Y3A4	RRP7A_HUMAN	RRP7A	Ribosomal RNA-processing protein 7 homolog A OS=Homo sapiens OX=9606 GN=RRP7A PE=1 SV=2	32.334	280	1.06718	0.0938066	0.694791	0.990959	4	18.2859	18.0283	18.2253	17.9013
Q9NRY4	RHG35_HUMAN	ARHGAP35	Rho GTPase-activating protein 35 OS=Homo sapiens OX=9606 GN=ARHGAP35 PE=1 SV=3	170.514	1499	1.06715	0.0937622	0.405581	0.990959	4	18.9292	18.8789	18.8964	18.7242
O75832	PSD10_HUMAN	PSMD10	26S proteasome non-ATPase regulatory subunit 10 OS=Homo sapiens OX=9606 GN=PSMD10 PE=1 SV=1	24.428	226	1.06714	0.093752	0.670409	0.990959	4	21.1558	21.3578	21.0022	21.3239
O95274	LYPD3_HUMAN	LYPD3	Ly6/PLAUR domain-containing protein 3 OS=Homo sapiens OX=9606 GN=LYPD3 PE=1 SV=2	35.971	346	1.06694	0.0934734	0.787359	0.993107	4	16.6507	17.1748	16.9729	16.6657
Q8IYA6	CKP2L_HUMAN	CKAP2L	Cytoskeleton-associated protein 2-like OS=Homo sapiens OX=9606 GN=CKAP2L PE=1 SV=4	83.587	745	1.0669	0.0934307	0.909034	1	4	15.4266	14.156	14.3521	15.0436
P54760	EPHB4_HUMAN	EPHB4	Ephrin type-B receptor 4 OS=Homo sapiens OX=9606 GN=EPHB4 PE=1 SV=2	108.27	987	1.06689	0.0934153	0.620763	0.990959	4	18.0464	17.8365	17.9703	17.7257
O15400	STX7_HUMAN	STX7	Syntaxin-7 OS=Homo sapiens OX=9606 GN=STX7 PE=1 SV=4	29.816	261	1.06686	0.0933764	0.156311	0.990959	4	20.7019	20.696	20.5636	20.6475
Q9BWU0	NADAP_HUMAN	SLC4A1AP	Kanadaptin OS=Homo sapiens OX=9606 GN=SLC4A1AP PE=1 SV=1	88.814	796	1.06681	0.093307	0.029156	0.990959	4	20.4661	20.4823	20.3668	20.3951
Q9UMS0	NFU1_HUMAN	NFU1	NFU1 iron-sulfur cluster scaffold homolog, mitochondrial OS=Homo sapiens OX=9606 GN=NFU1 PE=1 SV=2	28.463	254	1.06676	0.0932299	0.390985	0.990959	4	21.063	21.0142	20.863	21.0277
O76003	GLRX3_HUMAN	GLRX3	Glutaredoxin-3 OS=Homo sapiens OX=9606 GN=GLRX3 PE=1 SV=2	37.432	335	1.06674	0.0932102	0.589766	0.990959	4	23.3815	23.5069	23.2186	23.4834
Q9NY61	AATF_HUMAN	AATF	Protein AATF OS=Homo sapiens OX=9606 GN=AATF PE=1 SV=1	63.133	560	1.06672	0.0931781	0.39609	0.990959	4	20.0391	19.9936	19.8392	20.0071
Q14118	DAG1_HUMAN	DAG1	Dystroglycan OS=Homo sapiens OX=9606 GN=DAG1 PE=1 SV=2	97.441	895	1.06665	0.0930865	0.522684	0.990959	4	21.7084	21.6757	21.4789	21.719
Q9H3R2	MUC13_HUMAN	MUC13	Mucin-13 OS=Homo sapiens OX=9606 GN=MUC13 PE=1 SV=3	54.604	512	1.06664	0.0930788	0.593886	0.990959	4	21.1894	21.2986	21.0132	21.2886
Q5VV41	ARHGG_HUMAN	ARHGEF16	Rho guanine nucleotide exchange factor 16 OS=Homo sapiens OX=9606 GN=ARHGEF16 PE=1 SV=1	80.105	709	1.06664	0.0930728	0.512976	0.990959	4	19.4221	19.2435	19.3169	19.1626
Q9UNX4	WDR3_HUMAN	WDR3	WD repeat-containing protein 3 OS=Homo sapiens OX=9606 GN=WDR3 PE=1 SV=1	106.099	943	1.06645	0.0928161	0.589552	0.990959	4	21.4827	21.6	21.315	21.582
Q9NTN3	S35D1_HUMAN	SLC35D1	UDP-glucuronic acid/UDP-N-acetylgalactosamine transporter OS=Homo sapiens OX=9606 GN=SLC35D1 PE=2 SV=1	39.24	355	1.06642	0.0927773	0.5013	0.990959	4	17.8514	18.0452	17.7953	17.9157
P29966	MARCS_HUMAN	MARCKS	Myristoylated alanine-rich C-kinase substrate OS=Homo sapiens OX=9606 GN=MARCKS PE=1 SV=4	31.555	332	1.06639	0.0927402	0.402948	0.990959	4	22.8294	22.7778	22.6266	22.7951
Q16611	BAK_HUMAN	BAK1	Bcl-2 homologous antagonist/killer OS=Homo sapiens OX=9606 GN=BAK1 PE=1 SV=1	23.409	211	1.06628	0.0925816	0.702729	0.990959	4	20.5942	20.8057	20.4256	20.7891
Q5PRF9	SMAG2_HUMAN	SAMD4B	Protein Smaug homolog 2 OS=Homo sapiens OX=9606 GN=SAMD4B PE=1 SV=1	75.483	694	1.06626	0.0925579	0.27569	0.990959	4	19.1014	19.1976	19.0965	19.0173
Q96J42	TXD15_HUMAN	TXNDC15	Thioredoxin domain-containing protein 15 OS=Homo sapiens OX=9606 GN=TXNDC15 PE=1 SV=1	39.885	360	1.06626	0.0925575	0.0941658	0.990959	4	20.2191	20.2446	20.1115	20.1672
P31751	AKT2_HUMAN	AKT2	RAC-beta serine/threonine-protein kinase OS=Homo sapiens OX=9606 GN=AKT2 PE=1 SV=2	55.769	481	1.06625	0.0925407	0.284159	0.990959	4	18.718	18.8389	18.6655	18.7064
Q5SW96	ARH_HUMAN	LDLRAP1	Low density lipoprotein receptor adapter protein 1 OS=Homo sapiens OX=9606 GN=LDLRAP1 PE=1 SV=3	33.885	308	1.06623	0.092524	0.618887	0.990959	4	18.5699	18.6453	18.3609	18.6692
Q9NYV4	CDK12_HUMAN	CDK12	Cyclin-dependent kinase 12 OS=Homo sapiens OX=9606 GN=CDK12 PE=1 SV=2	164.155	1490	1.0662	0.092481	0.0534739	0.990959	4	20.0302	20.024	19.9567	19.9125
Q4ZIN3	MBRL_HUMAN	TMEM259	Membralin OS=Homo sapiens OX=9606 GN=TMEM259 PE=1 SV=1	67.889	620	1.0662	0.09248	0.666226	0.990959	4	18.4933	18.4391	18.5564	18.191
Q8IZJ4	RGDSR_HUMAN	RGL4	Ral-GDS-related protein OS=Homo sapiens OX=9606 GN=RGL4 PE=2 SV=1	52.346	473	1.06611	0.0923592	0.820225	0.993107	4	15.4323	15.9534	15.845	15.3559
Q15019	SEPT2_HUMAN	SEPTIN2	Septin-2 OS=Homo sapiens OX=9606 GN=SEPTIN2 PE=1 SV=1	41.487	361	1.06598	0.0921752	0.558599	0.990959	4	22.062	22.1012	21.8584	22.1205
Q9H063	MAF1_HUMAN	MAF1	Repressor of RNA polymerase III transcription MAF1 homolog OS=Homo sapiens OX=9606 GN=MAF1 PE=1 SV=2	28.771	256	1.06597	0.0921705	0.826443	0.993107	4	18.7223	18.0012	18.3519	18.1872
Q8TB37	NUBPL_HUMAN	NUBPL	Iron-sulfur protein NUBPL OS=Homo sapiens OX=9606 GN=NUBPL PE=1 SV=3	34.083	319	1.06587	0.0920283	0.702593	0.990959	4	18.7305	18.6477	18.3923	18.8018
Q9Y2S6	TMA7_HUMAN	TMA7	Translation machinery-associated protein 7 OS=Homo sapiens OX=9606 GN=TMA7 PE=1 SV=1	7.066	64	1.06587	0.0920263	0.492838	0.990959	4	24.1083	24.1142	23.9087	24.1298
Q8TEW0	PARD3_HUMAN	PARD3	Partitioning defective 3 homolog OS=Homo sapiens OX=9606 GN=PARD3 PE=1 SV=2	151.423	1356	1.06561	0.0916837	0.000752815	0.403852	4	19.8476	19.8438	19.7557	19.7524
O60336	MABP1_HUMAN	MAPKBP1	Mitogen-activated protein kinase-binding protein 1 OS=Homo sapiens OX=9606 GN=MAPKBP1 PE=1 SV=4	163.818	1514	1.06554	0.0915811	0.311825	0.990959	4	17.655	17.5455	17.4679	17.5495
Q6ZWJ1	STXB4_HUMAN	STXBP4	Syntaxin-binding protein 4 OS=Homo sapiens OX=9606 GN=STXBP4 PE=1 SV=2	61.662	553	1.06544	0.0914511	0.777871	0.993107	4	17.6241	17.5048	17.7505	17.1955
Q3LFD5	UBP41_HUMAN	USP41	Putative ubiquitin carboxyl-terminal hydrolase 41 OS=Homo sapiens OX=9606 GN=USP41 PE=1 SV=2	41.394	358	1.06542	0.0914225	0.663811	0.990959	4	16.7567	17.0019	16.6546	16.9212
Q15911	ZFHX3_HUMAN	ZFHX3	Zinc finger homeobox protein 3 OS=Homo sapiens OX=9606 GN=ZFHX3 PE=1 SV=2	404.419	3703	1.06526	0.0912032	0.581167	0.990959	4	18.1924	17.9921	17.9035	18.0986
Q96EK9	KTI12_HUMAN	KTI12	Protein KTI12 homolog OS=Homo sapiens OX=9606 GN=KTI12 PE=1 SV=1	38.616	354	1.06515	0.0910549	0.472931	0.990959	4	19.6644	19.6278	19.4529	19.6572
O95070	YIF1A_HUMAN	YIF1A	Protein YIF1A OS=Homo sapiens OX=9606 GN=YIF1A PE=1 SV=2	32.011	293	1.06512	0.0910113	0.278889	0.990959	4	22.3541	22.327	22.1892	22.3099
Q06210	GFPT1_HUMAN	GFPT1	Glutamine--fructose-6-phosphate aminotransferase [isomerizing] 1 OS=Homo sapiens OX=9606 GN=GFPT1 PE=1 SV=3	78.806	699	1.06509	0.0909775	0.349161	0.990959	4	22.3208	22.3145	22.1517	22.3016
Q5RI15	COX20_HUMAN	COX20	Cytochrome c oxidase assembly protein COX20, mitochondrial OS=Homo sapiens OX=9606 GN=COX20 PE=1 SV=2	13.291	118	1.06507	0.0909541	0.236069	0.990959	4	21.0512	20.9538	20.9356	20.8875
O95263	PDE8B_HUMAN	PDE8B	High affinity cAMP-specific and IBMX-insensitive 3',5'-cyclic phosphodiesterase 8B OS=Homo sapiens OX=9606 GN=PDE8B PE=1 SV=2	98.979	885	1.06506	0.0909286	0.0720653	0.990959	4	18.1307	18.1813	18.0597	18.0704
Q969M7	UBE2F_HUMAN	UBE2F	NEDD8-conjugating enzyme UBE2F OS=Homo sapiens OX=9606 GN=UBE2F PE=1 SV=1	21.077	185	1.06495	0.090779	0.547458	0.990959	4	17.4815	17.4742	17.5135	17.2606
Q9UIG8	SO3A1_HUMAN	SLCO3A1	Solute carrier organic anion transporter family member 3A1 OS=Homo sapiens OX=9606 GN=SLCO3A1 PE=1 SV=3	76.553	710	1.06488	0.0906897	0.561836	0.990959	4	18.9413	19.0441	18.7809	19.0231
Q08752	PPID_HUMAN	PPID	Peptidyl-prolyl cis-trans isomerase D OS=Homo sapiens OX=9606 GN=PPID PE=1 SV=3	40.764	370	1.06488	0.0906895	0.070529	0.990959	4	21.9351	21.9151	21.811	21.8578
P57721	PCBP3_HUMAN	PCBP3	Poly(rC)-binding protein 3 OS=Homo sapiens OX=9606 GN=PCBP3 PE=1 SV=2	39.465	371	1.06483	0.0906166	0.7027	0.990959	4	20.2325	20.6432	20.3338	20.3606
Q9UBK7	RBL2A_HUMAN	RABL2A	Rab-like protein 2A OS=Homo sapiens OX=9606 GN=RABL2A PE=1 SV=1	26.115	228	1.06482	0.0906122	0.489224	0.990959	4	19.4254	19.6103	19.3717	19.4828
Q15653	IKBB_HUMAN	NFKBIB	NF-kappa-B inhibitor beta OS=Homo sapiens OX=9606 GN=NFKBIB PE=1 SV=2	37.771	356	1.06478	0.0905493	0.714001	0.990959	4	19.2031	18.8899	19.1025	18.8094
Q9H4H8	FA83D_HUMAN	FAM83D	Protein FAM83D OS=Homo sapiens OX=9606 GN=FAM83D PE=1 SV=3	64.425	585	1.06477	0.0905448	0.577949	0.990959	4	18.9027	18.7359	18.8381	18.6194
O43583	DENR_HUMAN	DENR	Density-regulated protein OS=Homo sapiens OX=9606 GN=DENR PE=1 SV=2	22.092	198	1.06472	0.0904713	0.311738	0.990959	4	22.1228	22.1599	21.986	22.1157
Q8WVM7	STAG1_HUMAN	STAG1	Cohesin subunit SA-1 OS=Homo sapiens OX=9606 GN=STAG1 PE=1 SV=3	144.427	1258	1.06464	0.0903715	0.167722	0.990959	4	20.269	20.228	20.1208	20.1954
Q4V328	GRAP1_HUMAN	GRIPAP1	GRIP1-associated protein 1 OS=Homo sapiens OX=9606 GN=GRIPAP1 PE=1 SV=2	96.006	841	1.06458	0.0902855	0.34814	0.990959	4	19.6304	19.5554	19.4385	19.5667
Q96QE5	TEFM_HUMAN	TEFM	Transcription elongation factor, mitochondrial OS=Homo sapiens OX=9606 GN=TEFM PE=1 SV=1	41.676	360	1.06455	0.0902406	0.712641	0.990959	4	17.8098	17.9257	17.5728	17.9821
Q969Q5	RAB24_HUMAN	RAB24	Ras-related protein Rab-24 OS=Homo sapiens OX=9606 GN=RAB24 PE=1 SV=1	23.124	203	1.0645	0.0901754	0.397982	0.990959	4	19.3646	19.3519	19.1838	19.3524
Q96S97	MYADM_HUMAN	MYADM	Myeloid-associated differentiation marker OS=Homo sapiens OX=9606 GN=MYADM PE=1 SV=2	35.274	322	1.06448	0.090154	0.368999	0.990959	4	21.8834	21.7535	21.6845	21.7721
O00194	RB27B_HUMAN	RAB27B	Ras-related protein Rab-27B OS=Homo sapiens OX=9606 GN=RAB27B PE=1 SV=4	24.608	218	1.06447	0.0901364	0.10468	0.990959	4	20.4781	20.4888	20.362	20.4245
P47224	MSS4_HUMAN	RABIF	Guanine nucleotide exchange factor MSS4 OS=Homo sapiens OX=9606 GN=RABIF PE=1 SV=2	13.839	123	1.06441	0.0900485	0.546268	0.990959	4	20.9645	21.2037	21.0306	20.9575
Q96G46	DUS3L_HUMAN	DUS3L	tRNA-dihydrouridine(47) synthase [NAD(P)(+)]-like OS=Homo sapiens OX=9606 GN=DUS3L PE=1 SV=2	72.594	650	1.06424	0.08983	0.419827	0.990959	4	20.5357	20.4173	20.32	20.4533
Q5T447	HECD3_HUMAN	HECTD3	E3 ubiquitin-protein ligase HECTD3 OS=Homo sapiens OX=9606 GN=HECTD3 PE=1 SV=1	97.113	861	1.06424	0.0898291	0.483336	0.990959	4	18.52	18.3276	18.2912	18.3767
P22732	GTR5_HUMAN	SLC2A5	Solute carrier family 2, facilitated glucose transporter member 5 OS=Homo sapiens OX=9606 GN=SLC2A5 PE=1 SV=1	54.974	501	1.06423	0.0898111	0.873879	0.998138	4	15.3544	15.6935	14.9643	15.904
Q9UK97	FBX9_HUMAN	FBXO9	F-box only protein 9 OS=Homo sapiens OX=9606 GN=FBXO9 PE=1 SV=1	52.329	447	1.0642	0.0897666	0.482704	0.990959	4	17.7887	17.5787	17.5955	17.5923
Q9UHP3	UBP25_HUMAN	USP25	Ubiquitin carboxyl-terminal hydrolase 25 OS=Homo sapiens OX=9606 GN=USP25 PE=1 SV=4	122.218	1055	1.06417	0.0897295	0.57058	0.990959	4	17.2389	17.1223	16.9708	17.2109
Q92990	GLMN_HUMAN	GLMN	Glomulin OS=Homo sapiens OX=9606 GN=GLMN PE=1 SV=2	68.208	594	1.06417	0.0897236	0.424576	0.990959	4	20.8565	21.0367	20.8607	20.853
Q96TC7	RMD3_HUMAN	RMDN3	Regulator of microtubule dynamics protein 3 OS=Homo sapiens OX=9606 GN=RMDN3 PE=1 SV=2	52.118	470	1.06416	0.0897171	0.209859	0.990959	4	21.1712	21.1767	21.0351	21.1334
Q9NV31	IMP3_HUMAN	IMP3	U3 small nucleolar ribonucleoprotein protein IMP3 OS=Homo sapiens OX=9606 GN=IMP3 PE=1 SV=1	21.85	184	1.06407	0.0895919	0.607278	0.990959	4	21.5879	21.6472	21.3826	21.6733
P00395	COX1_HUMAN	MT-CO1	Cytochrome c oxidase subunit 1 OS=Homo sapiens OX=9606 GN=MT-CO1 PE=1 SV=1	57.041	513	1.06406	0.0895763	0.758907	0.99164	4	16.1933	16.6412	16.2057	16.4496
Q15629	TRAM1_HUMAN	TRAM1	Translocating chain-associated membrane protein 1 OS=Homo sapiens OX=9606 GN=TRAM1 PE=1 SV=3	43.072	374	1.06401	0.0895092	0.609768	0.990959	4	21.6306	21.715	21.44	21.7265
P35268	RL22_HUMAN	RPL22	60S ribosomal protein L22 OS=Homo sapiens OX=9606 GN=RPL22 PE=1 SV=2	14.787	128	1.06387	0.0893252	0.343857	0.990959	4	26.3604	26.4755	26.2843	26.373
Q96CW6	S7A6O_HUMAN	SLC7A6OS	Probable RNA polymerase II nuclear localization protein SLC7A6OS OS=Homo sapiens OX=9606 GN=SLC7A6OS PE=1 SV=2	35.028	309	1.06384	0.0892833	0.643168	0.990959	4	19.2352	18.978	19.1211	18.9135
Q16186	ADRM1_HUMAN	ADRM1	Proteasomal ubiquitin receptor ADRM1 OS=Homo sapiens OX=9606 GN=ADRM1 PE=1 SV=2	42.153	407	1.06375	0.0891659	0.449632	0.990959	4	22.183	21.9966	21.9791	22.0222
Q9Y6I4	UBP3_HUMAN	USP3	Ubiquitin carboxyl-terminal hydrolase 3 OS=Homo sapiens OX=9606 GN=USP3 PE=1 SV=2	58.897	520	1.06369	0.0890734	0.318533	0.990959	4	18.6975	18.624	18.6285	18.5149
Q8WY22	BRI3B_HUMAN	BRI3BP	BRI3-binding protein OS=Homo sapiens OX=9606 GN=BRI3BP PE=1 SV=1	27.836	251	1.06367	0.0890472	0.629187	0.990959	4	21.0062	21.0407	20.7776	21.0911
P20336	RAB3A_HUMAN	RAB3A	Ras-related protein Rab-3A OS=Homo sapiens OX=9606 GN=RAB3A PE=1 SV=1	24.984	220	1.06358	0.0889345	0.449234	0.990959	4	18.721	18.6969	18.5255	18.7145
Q9P2C4	TM181_HUMAN	TMEM181	Transmembrane protein 181 OS=Homo sapiens OX=9606 GN=TMEM181 PE=1 SV=2	69.325	612	1.06357	0.0889119	0.565503	0.990959	4	17.9655	17.746	17.6966	17.8371
Q8TEL6	TP4AP_HUMAN	TRPC4AP	Short transient receptor potential channel 4-associated protein OS=Homo sapiens OX=9606 GN=TRPC4AP PE=1 SV=2	90.852	797	1.06357	0.0889084	0.219861	0.990959	4	17.9454	18.0287	17.8697	17.9266
P20810	ICAL_HUMAN	CAST	Calpastatin OS=Homo sapiens OX=9606 GN=CAST PE=1 SV=4	76.573	708	1.06355	0.0888876	0.395122	0.990959	4	23.5857	23.6611	23.4609	23.6082
Q8TEQ6	GEMI5_HUMAN	GEMIN5	Gem-associated protein 5 OS=Homo sapiens OX=9606 GN=GEMIN5 PE=1 SV=3	168.589	1508	1.06351	0.0888295	0.46772	0.990959	4	21.5793	21.7197	21.4896	21.6318
Q96FX7	TRM61_HUMAN	TRMT61A	tRNA (adenine(58)-N(1))-methyltransferase catalytic subunit TRMT61A OS=Homo sapiens OX=9606 GN=TRMT61A PE=1 SV=1	31.382	289	1.06334	0.0886075	0.17683	0.990959	4	18.3669	18.4417	18.3373	18.294
Q9BVW5	TIPIN_HUMAN	TIPIN	TIMELESS-interacting protein OS=Homo sapiens OX=9606 GN=TIPIN PE=1 SV=2	34.555	301	1.06331	0.0885608	0.393311	0.990959	4	18.1491	18.1898	18.0014	18.1604
Q9BVL2	NUP58_HUMAN	NUP58	Nucleoporin p58/p45 OS=Homo sapiens OX=9606 GN=NUP58 PE=1 SV=1	60.897	599	1.06331	0.0885586	0.0364312	0.990959	4	20.1491	20.1176	20.0374	20.0522
O75396	SC22B_HUMAN	SEC22B	Vesicle-trafficking protein SEC22b OS=Homo sapiens OX=9606 GN=SEC22B PE=1 SV=4	24.593	215	1.0632	0.0884138	0.36016	0.990959	4	23.1968	23.1328	23.0084	23.1443
Q9NVD7	PARVA_HUMAN	PARVA	Alpha-parvin OS=Homo sapiens OX=9606 GN=PARVA PE=1 SV=1	42.244	372	1.06319	0.0884032	0.649692	0.990959	4	20.9664	20.7998	20.6498	20.9396
Q8N806	UBR7_HUMAN	UBR7	Putative E3 ubiquitin-protein ligase UBR7 OS=Homo sapiens OX=9606 GN=UBR7 PE=1 SV=2	47.999	425	1.06299	0.0881322	0.528269	0.990959	4	19.1015	19.1425	19.1485	18.9192
Q9C0D5	TANC1_HUMAN	TANC1	Protein TANC1 OS=Homo sapiens OX=9606 GN=TANC1 PE=1 SV=3	202.219	1861	1.06284	0.0879245	0.473845	0.990959	4	18.5939	18.6782	18.4569	18.6394
P34897	GLYM_HUMAN	SHMT2	Serine hydroxymethyltransferase, mitochondrial OS=Homo sapiens OX=9606 GN=SHMT2 PE=1 SV=3	55.993	504	1.06281	0.0878843	0.489674	0.990959	4	23.9613	24.0165	23.8	24.0021
Q9Y3Q3	TMED3_HUMAN	TMED3	Transmembrane emp24 domain-containing protein 3 OS=Homo sapiens OX=9606 GN=TMED3 PE=1 SV=1	24.777	217	1.06279	0.087862	0.680363	0.990959	4	19.333	19.7004	19.4424	19.4153
Q96J84	KIRR1_HUMAN	KIRREL1	Kin of IRRE-like protein 1 OS=Homo sapiens OX=9606 GN=KIRREL1 PE=1 SV=2	83.536	757	1.06277	0.0878241	0.42449	0.990959	4	19.2513	19.4058	19.2833	19.1981
Q8WTS6	SETD7_HUMAN	SETD7	Histone-lysine N-methyltransferase SETD7 OS=Homo sapiens OX=9606 GN=SETD7 PE=1 SV=1	40.721	366	1.06276	0.0878219	0.768024	0.992261	4	19.7335	19.3098	19.2824	19.5853
O14733	MP2K7_HUMAN	MAP2K7	Dual specificity mitogen-activated protein kinase kinase 7 OS=Homo sapiens OX=9606 GN=MAP2K7 PE=1 SV=2	47.485	419	1.06276	0.0878143	0.62969	0.990959	4	19.0315	19.0902	19.126	18.8201
O15381	NVL_HUMAN	NVL	Nuclear valosin-containing protein-like OS=Homo sapiens OX=9606 GN=NVL PE=1 SV=1	95.051	856	1.06275	0.0878038	0.374812	0.990959	4	19.9027	20.0498	19.913	19.864
Q9Y2X9	ZN281_HUMAN	ZNF281	Zinc finger protein 281 OS=Homo sapiens OX=9606 GN=ZNF281 PE=1 SV=1	96.915	895	1.06272	0.0877613	0.3105	0.990959	4	18.8095	18.9309	18.7586	18.8063
Q96ME7	ZN512_HUMAN	ZNF512	Zinc finger protein 512 OS=Homo sapiens OX=9606 GN=ZNF512 PE=1 SV=2	64.682	567	1.06271	0.0877439	0.404175	0.990959	4	18.4447	18.5207	18.3205	18.4695
P62879	GBB2_HUMAN	GNB2	Guanine nucleotide-binding protein G(I)/G(S)/G(T) subunit beta-2 OS=Homo sapiens OX=9606 GN=GNB2 PE=1 SV=3	37.331	340	1.06259	0.087583	0.538737	0.990959	4	23.951	23.9917	23.7664	24.0011
Q9P1Z2	CACO1_HUMAN	CALCOCO1	Calcium-binding and coiled-coil domain-containing protein 1 OS=Homo sapiens OX=9606 GN=CALCOCO1 PE=1 SV=2	77.336	691	1.06256	0.0875405	0.132201	0.990959	4	19.5691	19.5263	19.4319	19.4885
Q9BSJ8	ESYT1_HUMAN	ESYT1	Extended synaptotagmin-1 OS=Homo sapiens OX=9606 GN=ESYT1 PE=1 SV=1	122.856	1104	1.06248	0.0874291	0.390337	0.990959	4	22.3786	22.389	22.2162	22.3766
O60925	PFD1_HUMAN	PFDN1	Prefoldin subunit 1 OS=Homo sapiens OX=9606 GN=PFDN1 PE=1 SV=2	14.21	122	1.06246	0.0874077	0.452778	0.990959	4	22.7324	22.6438	22.5172	22.6842
O94854	K0754_HUMAN	KIAA0754	Uncharacterized protein KIAA0754 OS=Homo sapiens OX=9606 GN=KIAA0754 PE=2 SV=4	135.148	1291	1.06246	0.0874074	0.400958	0.990959	4	17.748	17.8645	17.7774	17.6603
O75381	PEX14_HUMAN	PEX14	Peroxisomal membrane protein PEX14 OS=Homo sapiens OX=9606 GN=PEX14 PE=1 SV=1	41.237	377	1.06244	0.087388	0.028398	0.990959	4	19.7324	19.7472	19.6393	19.6655
P52630	STAT2_HUMAN	STAT2	Signal transducer and activator of transcription 2 OS=Homo sapiens OX=9606 GN=STAT2 PE=1 SV=1	97.916	851	1.06237	0.0872834	0.153885	0.990959	4	18.5025	18.4915	18.3712	18.4482
Q9H7E2	TDRD3_HUMAN	TDRD3	Tudor domain-containing protein 3 OS=Homo sapiens OX=9606 GN=TDRD3 PE=1 SV=1	73.185	651	1.06231	0.0872111	0.639012	0.990959	4	19.5537	19.7341	19.688	19.4254
Q9Y548	YIPF1_HUMAN	YIPF1	Protein YIPF1 OS=Homo sapiens OX=9606 GN=YIPF1 PE=1 SV=1	34.277	306	1.06216	0.0870057	0.880951	0.998138	4	18.3837	17.6673	17.5711	18.3059
Q96F86	EDC3_HUMAN	EDC3	Enhancer of mRNA-decapping protein 3 OS=Homo sapiens OX=9606 GN=EDC3 PE=1 SV=1	56.078	508	1.06213	0.0869544	0.192393	0.990959	4	20.3608	20.4477	20.3061	20.3286
Q96EV8	DTBP1_HUMAN	DTNBP1	Dysbindin OS=Homo sapiens OX=9606 GN=DTNBP1 PE=1 SV=1	39.493	351	1.06212	0.0869425	0.43375	0.990959	4	18.9948	18.9704	18.807	18.9843
Q9NXN4	GDAP2_HUMAN	GDAP2	Ganglioside-induced differentiation-associated protein 2 OS=Homo sapiens OX=9606 GN=GDAP2 PE=1 SV=1	56.225	497	1.06203	0.0868294	0.358632	0.990959	4	19.0527	18.9313	18.8638	18.9465
P17987	TCPA_HUMAN	TCP1	T-complex protein 1 subunit alpha OS=Homo sapiens OX=9606 GN=TCP1 PE=1 SV=1	60.344	556	1.06202	0.0868163	0.490447	0.990959	4	24.5653	24.5285	24.3581	24.5621
O43427	FIBP_HUMAN	FIBP	Acidic fibroblast growth factor intracellular-binding protein OS=Homo sapiens OX=9606 GN=FIBP PE=1 SV=3	41.878	364	1.06201	0.0867949	0.385596	0.990959	4	20.0717	19.9145	19.9002	19.9124
Q9H147	TDIF1_HUMAN	DNTTIP1	Deoxynucleotidyltransferase terminal-interacting protein 1 OS=Homo sapiens OX=9606 GN=DNTTIP1 PE=1 SV=2	37.013	329	1.06199	0.0867745	0.574774	0.990959	4	18.7023	18.586	18.4404	18.6743
P62805	H4_HUMAN	H4C1	Histone H4 OS=Homo sapiens OX=9606 GN=H4C1 PE=1 SV=2	11.367	103	1.06198	0.0867608	0.602182	0.990959	4	30.4346	30.3806	30.1819	30.4597
P51948	MAT1_HUMAN	MNAT1	CDK-activating kinase assembly factor MAT1 OS=Homo sapiens OX=9606 GN=MNAT1 PE=1 SV=1	35.823	309	1.06192	0.086674	0.186178	0.990959	4	19.6368	19.6351	19.5055	19.5931
Q5JPI9	EFMT2_HUMAN	EEF1AKMT2	EEF1A lysine methyltransferase 2 OS=Homo sapiens OX=9606 GN=EEF1AKMT2 PE=1 SV=2	31.83	291	1.06191	0.0866657	0.831975	0.993107	4	17.6853	17.4489	17.1409	17.82
P11047	LAMC1_HUMAN	LAMC1	Laminin subunit gamma-1 OS=Homo sapiens OX=9606 GN=LAMC1 PE=1 SV=3	177.603	1609	1.0619	0.0866458	0.24666	0.990959	4	19.9878	20.0926	19.9427	19.9643
P30414	NKTR_HUMAN	NKTR	NK-tumor recognition protein OS=Homo sapiens OX=9606 GN=NKTR PE=1 SV=2	165.677	1462	1.06182	0.0865439	0.665385	0.990959	4	17.8216	17.6113	17.7665	17.4934
B0YJ81	HACD1_HUMAN	HACD1	Very-long-chain (3R)-3-hydroxyacyl-CoA dehydratase 1 OS=Homo sapiens OX=9606 GN=HACD1 PE=1 SV=1	32.388	288	1.06169	0.0863693	0.201699	0.990959	4	16.0529	16.121	15.9696	16.0316
Q9HCL2	GPAT1_HUMAN	GPAM	Glycerol-3-phosphate acyltransferase 1, mitochondrial OS=Homo sapiens OX=9606 GN=GPAM PE=1 SV=3	93.795	828	1.06166	0.0863154	0.586639	0.990959	4	17.7459	18.0114	17.8137	17.771
O95747	OXSR1_HUMAN	OXSR1	Serine/threonine-protein kinase OSR1 OS=Homo sapiens OX=9606 GN=OXSR1 PE=1 SV=1	58.022	527	1.06163	0.086287	0.595117	0.990959	4	22.0171	21.9676	21.7705	22.0416
Q8IZA0	K319L_HUMAN	KIAA0319L	Dyslexia-associated protein KIAA0319-like protein OS=Homo sapiens OX=9606 GN=KIAA0319L PE=1 SV=2	115.658	1049	1.06158	0.0862159	0.874146	0.998138	4	17.3953	16.494	17.0254	16.6916
Q9Y5A7	NUB1_HUMAN	NUB1	NEDD8 ultimate buster 1 OS=Homo sapiens OX=9606 GN=NUB1 PE=1 SV=2	70.538	615	1.06156	0.0861845	0.755261	0.990959	4	18.7083	18.8429	18.4575	18.9213
Q9NRA8	4ET_HUMAN	EIF4ENIF1	Eukaryotic translation initiation factor 4E transporter OS=Homo sapiens OX=9606 GN=EIF4ENIF1 PE=1 SV=2	108.201	985	1.06156	0.0861837	0.870658	0.998138	4	17.2778	17.2064	17.6218	16.6901
P56134	ATPK_HUMAN	ATP5MF	ATP synthase subunit f, mitochondrial OS=Homo sapiens OX=9606 GN=ATP5MF PE=1 SV=3	10.918	94	1.0615	0.0861007	0.370186	0.990959	4	22.5652	22.5725	22.4078	22.5578
P49755	TMEDA_HUMAN	TMED10	Transmembrane emp24 domain-containing protein 10 OS=Homo sapiens OX=9606 GN=TMED10 PE=1 SV=2	24.976	219	1.0615	0.086099	0.555594	0.990959	4	24.237	24.0399	23.9793	24.1255
Q13421	MSLN_HUMAN	MSLN	Mesothelin OS=Homo sapiens OX=9606 GN=MSLN PE=1 SV=2	68.986	630	1.06148	0.0860793	0.240763	0.990959	4	18.4979	18.5813	18.4849	18.4222
Q9NUJ3	T11L1_HUMAN	TCP11L1	T-complex protein 11-like protein 1 OS=Homo sapiens OX=9606 GN=TCP11L1 PE=1 SV=1	57.035	509	1.06142	0.0859939	0.499448	0.990959	4	18.5982	18.5789	18.6073	18.3979
P41440	S19A1_HUMAN	SLC19A1	Reduced folate transporter OS=Homo sapiens OX=9606 GN=SLC19A1 PE=1 SV=3	64.868	591	1.06124	0.0857518	0.339873	0.990959	4	20.0079	19.9055	19.9172	19.8247
Q8WVB6	CTF18_HUMAN	CHTF18	Chromosome transmission fidelity protein 18 homolog OS=Homo sapiens OX=9606 GN=CHTF18 PE=1 SV=1	107.383	975	1.06112	0.0855827	0.527686	0.990959	4	17.5507	17.7732	17.5959	17.5568
Q5GLZ8	HERC4_HUMAN	HERC4	Probable E3 ubiquitin-protein ligase HERC4 OS=Homo sapiens OX=9606 GN=HERC4 PE=1 SV=1	118.563	1057	1.06108	0.0855278	0.451213	0.990959	4	21.9606	21.971	21.7883	21.9722
Q9UPN9	TRI33_HUMAN	TRIM33	E3 ubiquitin-protein ligase TRIM33 OS=Homo sapiens OX=9606 GN=TRIM33 PE=1 SV=3	122.533	1127	1.06104	0.0854786	0.254591	0.990959	4	20.3987	20.4663	20.3049	20.3892
Q9UFG5	CS025_HUMAN	C19orf25	UPF0449 protein C19orf25 OS=Homo sapiens OX=9606 GN=C19orf25 PE=1 SV=2	12.878	118	1.06101	0.0854369	0.640969	0.990959	4	18.5636	18.6517	18.673	18.3715
Q99519	NEUR1_HUMAN	NEU1	Sialidase-1 OS=Homo sapiens OX=9606 GN=NEU1 PE=1 SV=1	45.467	415	1.06096	0.0853641	0.629616	0.990959	4	19.2452	18.9493	19.0439	18.9798
Q6UWP7	LCLT1_HUMAN	LCLAT1	Lysocardiolipin acyltransferase 1 OS=Homo sapiens OX=9606 GN=LCLAT1 PE=1 SV=1	48.92	414	1.06092	0.0853192	0.599392	0.990959	4	20.9098	20.8457	20.6582	20.9267
Q4KMQ2	ANO6_HUMAN	ANO6	Anoctamin-6 OS=Homo sapiens OX=9606 GN=ANO6 PE=1 SV=2	106.165	910	1.06092	0.0853156	0.595169	0.990959	4	18.7809	18.9509	18.8871	18.6741
P43005	EAA3_HUMAN	SLC1A1	Excitatory amino acid transporter 3 OS=Homo sapiens OX=9606 GN=SLC1A1 PE=1 SV=2	57.1	524	1.06077	0.0851165	0.692824	0.990959	4	17.6621	17.8022	17.4742	17.8198
O43318	M3K7_HUMAN	MAP3K7	Mitogen-activated protein kinase kinase kinase 7 OS=Homo sapiens OX=9606 GN=MAP3K7 PE=1 SV=1	67.196	606	1.06076	0.0850988	0.543995	0.990959	4	17.6676	17.5587	17.424	17.6321
Q96JG6	VPS50_HUMAN	VPS50	Syndetin OS=Homo sapiens OX=9606 GN=VPS50 PE=1 SV=3	111.174	964	1.06072	0.0850383	0.50495	0.990959	4	18.8181	18.9304	18.6998	18.8786
P51665	PSMD7_HUMAN	PSMD7	26S proteasome non-ATPase regulatory subunit 7 OS=Homo sapiens OX=9606 GN=PSMD7 PE=1 SV=2	37.025	324	1.06063	0.0849215	0.417047	0.990959	4	22.9831	22.9677	22.8071	22.9738
P82675	RT05_HUMAN	MRPS5	28S ribosomal protein S5, mitochondrial OS=Homo sapiens OX=9606 GN=MRPS5 PE=1 SV=2	48.006	430	1.06043	0.0846478	0.182373	0.990959	4	20.3524	20.409	20.3273	20.2649
Q9H2C0	GAN_HUMAN	GAN	Gigaxonin OS=Homo sapiens OX=9606 GN=GAN PE=1 SV=1	67.638	597	1.0604	0.0846109	0.418232	0.990959	4	17.6292	17.4665	17.4827	17.4438
P19404	NDUV2_HUMAN	NDUFV2	NADH dehydrogenase [ubiquinone] flavoprotein 2, mitochondrial OS=Homo sapiens OX=9606 GN=NDUFV2 PE=1 SV=2	27.392	249	1.0604	0.0846073	0.56584	0.990959	4	22.3908	22.3748	22.1743	22.4221
O95260	ATE1_HUMAN	ATE1	Arginyl-tRNA--protein transferase 1 OS=Homo sapiens OX=9606 GN=ATE1 PE=1 SV=2	59.09	518	1.06035	0.084537	0.368404	0.990959	4	18.7509	18.7351	18.5855	18.7314
Q7KYR7	BT2A1_HUMAN	BTN2A1	Butyrophilin subfamily 2 member A1 OS=Homo sapiens OX=9606 GN=BTN2A1 PE=1 SV=3	59.633	527	1.06033	0.0845084	0.309235	0.990959	4	17.5905	17.6552	17.4848	17.5919
Q5TDH0	DDI2_HUMAN	DDI2	Protein DDI1 homolog 2 OS=Homo sapiens OX=9606 GN=DDI2 PE=1 SV=1	44.523	399	1.06029	0.0844634	0.0122888	0.990959	4	19.9667	19.9643	19.8904	19.8716
Q96EZ8	MCRS1_HUMAN	MCRS1	Microspherule protein 1 OS=Homo sapiens OX=9606 GN=MCRS1 PE=1 SV=1	51.803	462	1.06029	0.0844626	0.113341	0.990959	4	20.326	20.3001	20.2002	20.2569
Q14534	ERG1_HUMAN	SQLE	Squalene monooxygenase OS=Homo sapiens OX=9606 GN=SQLE PE=1 SV=3	63.923	574	1.06024	0.0843929	0.154421	0.990959	4	18.6856	18.6135	18.5542	18.5761
Q15398	DLGP5_HUMAN	DLGAP5	Disks large-associated protein 5 OS=Homo sapiens OX=9606 GN=DLGAP5 PE=1 SV=2	95.115	846	1.06015	0.0842686	0.286381	0.990959	4	18.7547	18.7246	18.7119	18.5989
P52888	THOP1_HUMAN	THOP1	Thimet oligopeptidase OS=Homo sapiens OX=9606 GN=THOP1 PE=1 SV=2	78.84	689	1.06004	0.0841171	0.524476	0.990959	4	22.1971	22.2063	22.0076	22.2275
Q15361	TTF1_HUMAN	TTF1	Transcription termination factor 1 OS=Homo sapiens OX=9606 GN=TTF1 PE=1 SV=3	103.051	905	1.06002	0.084098	0.468822	0.990959	4	19.161	19.2638	19.208	19.0486
O00303	EIF3F_HUMAN	EIF3F	Eukaryotic translation initiation factor 3 subunit F OS=Homo sapiens OX=9606 GN=EIF3F PE=1 SV=1	37.564	357	1.05998	0.0840391	0.53238	0.990959	4	23.733	23.7851	23.5658	23.7843
Q6N075	MFSD5_HUMAN	MFSD5	Molybdate-anion transporter OS=Homo sapiens OX=9606 GN=MFSD5 PE=1 SV=2	49.765	450	1.05994	0.0839813	0.617427	0.990959	4	18.4571	18.7423	18.5309	18.5005
Q96ND0	F210A_HUMAN	FAM210A	Protein FAM210A OS=Homo sapiens OX=9606 GN=FAM210A PE=1 SV=2	30.777	272	1.05981	0.0838068	0.149979	0.990959	4	19.7557	19.7059	19.62	19.674
P09001	RM03_HUMAN	MRPL3	39S ribosomal protein L3, mitochondrial OS=Homo sapiens OX=9606 GN=MRPL3 PE=1 SV=1	38.633	348	1.05979	0.083785	0.427712	0.990959	4	20.9344	21.0288	20.8273	20.9684
Q9UQ35	SRRM2_HUMAN	SRRM2	Serine/arginine repetitive matrix protein 2 OS=Homo sapiens OX=9606 GN=SRRM2 PE=1 SV=2	299.615	2752	1.05977	0.0837457	0.284475	0.990959	4	23.7774	23.822	23.7693	23.6626
Q9UEE9	CFDP1_HUMAN	CFDP1	Craniofacial development protein 1 OS=Homo sapiens OX=9606 GN=CFDP1 PE=1 SV=1	33.593	299	1.05975	0.083719	0.586934	0.990959	4	19.8463	19.8591	19.6386	19.8994
Q14157	UBP2L_HUMAN	UBAP2L	Ubiquitin-associated protein 2-like OS=Homo sapiens OX=9606 GN=UBAP2L PE=1 SV=2	114.535	1087	1.05975	0.0837176	0.356941	0.990959	4	22.1115	22.1853	22.1248	22.0046
P35659	DEK_HUMAN	DEK	Protein DEK OS=Homo sapiens OX=9606 GN=DEK PE=1 SV=1	42.674	375	1.05966	0.0835964	0.508488	0.990959	4	22.8185	22.842	22.6426	22.8507
O94919	ENDD1_HUMAN	ENDOD1	Endonuclease domain-containing 1 protein OS=Homo sapiens OX=9606 GN=ENDOD1 PE=1 SV=2	55.017	500	1.05965	0.0835814	0.726162	0.990959	4	18.073	17.9855	17.7428	18.1486
Q7L273	KCTD9_HUMAN	KCTD9	BTB/POZ domain-containing protein KCTD9 OS=Homo sapiens OX=9606 GN=KCTD9 PE=1 SV=1	42.567	389	1.05962	0.0835517	0.114797	0.990959	4	19.3732	19.3187	19.2773	19.2475
Q8TAF3	WDR48_HUMAN	WDR48	WD repeat-containing protein 48 OS=Homo sapiens OX=9606 GN=WDR48 PE=1 SV=1	76.21	677	1.05962	0.083548	0.0152248	0.990959	4	19.8941	19.8931	19.7996	19.8205
P52594	AGFG1_HUMAN	AGFG1	Arf-GAP domain and FG repeat-containing protein 1 OS=Homo sapiens OX=9606 GN=AGFG1 PE=1 SV=2	58.26	562	1.05959	0.0835055	0.307988	0.990959	4	19.9784	19.9694	19.8289	19.9518
Q8NFH4	NUP37_HUMAN	NUP37	Nucleoporin Nup37 OS=Homo sapiens OX=9606 GN=NUP37 PE=1 SV=1	36.708	326	1.05959	0.0835051	0.775596	0.993107	4	21.3922	21.6585	21.2227	21.661
Q9Y251	HPSE_HUMAN	HPSE	Heparanase OS=Homo sapiens OX=9606 GN=HPSE PE=1 SV=2	61.149	543	1.05958	0.0834989	0.828234	0.993107	4	18.1071	17.4425	17.7566	17.6261
Q9Y2D4	EXC6B_HUMAN	EXOC6B	Exocyst complex component 6B OS=Homo sapiens OX=9606 GN=EXOC6B PE=1 SV=3	94.201	811	1.05957	0.0834842	0.0149844	0.990959	4	18.9533	18.9506	18.8787	18.8582
Q9H0V9	LMA2L_HUMAN	LMAN2L	VIP36-like protein OS=Homo sapiens OX=9606 GN=LMAN2L PE=1 SV=1	39.711	348	1.05944	0.0833069	0.119407	0.990959	4	20.0364	20.0892	19.962	19.997
Q96KB5	TOPK_HUMAN	PBK	Lymphokine-activated killer T-cell-originated protein kinase OS=Homo sapiens OX=9606 GN=PBK PE=1 SV=3	36.085	322	1.05942	0.0832728	0.430762	0.990959	4	21.3214	21.2318	21.121	21.2656
Q14353	GAMT_HUMAN	GAMT	Guanidinoacetate N-methyltransferase OS=Homo sapiens OX=9606 GN=GAMT PE=1 SV=1	26.318	236	1.05941	0.0832648	0.744587	0.990959	4	18.6869	18.3715	18.2885	18.6034
P62841	RS15_HUMAN	RPS15	40S ribosomal protein S15 OS=Homo sapiens OX=9606 GN=RPS15 PE=1 SV=2	17.04	145	1.0593	0.0831152	0.286299	0.990959	4	24.3879	24.2778	24.2324	24.2671
Q07021	C1QBP_HUMAN	C1QBP	Complement component 1 Q subcomponent-binding protein, mitochondrial OS=Homo sapiens OX=9606 GN=C1QBP PE=1 SV=1	31.362	282	1.05928	0.0830883	0.757636	0.99164	4	24.2129	24.1571	23.8684	24.3354
Q9HCK8	CHD8_HUMAN	CHD8	Chromodomain-helicase-DNA-binding protein 8 OS=Homo sapiens OX=9606 GN=CHD8 PE=1 SV=5	290.519	2581	1.05927	0.083072	0.144614	0.990959	4	19.0944	19.1032	18.9804	19.051
Q5T1M5	FKB15_HUMAN	FKBP15	FK506-binding protein 15 OS=Homo sapiens OX=9606 GN=FKBP15 PE=1 SV=2	133.63	1219	1.05927	0.0830636	0.0403687	0.990959	4	19.3444	19.3104	19.2469	19.2418
Q8NC56	LEMD2_HUMAN	LEMD2	LEM domain-containing protein 2 OS=Homo sapiens OX=9606 GN=LEMD2 PE=1 SV=1	56.975	503	1.05916	0.0829264	0.57938	0.990959	4	20.1981	20.2168	19.9984	20.2507
Q8IWU5	SULF2_HUMAN	SULF2	Extracellular sulfatase Sulf-2 OS=Homo sapiens OX=9606 GN=SULF2 PE=1 SV=1	100.455	870	1.05913	0.0828817	0.917417	1	4	15.564	14.6043	15.5208	14.4817
P50991	TCPD_HUMAN	CCT4	T-complex protein 1 subunit delta OS=Homo sapiens OX=9606 GN=CCT4 PE=1 SV=4	57.924	539	1.05905	0.0827739	0.397557	0.990959	4	25.1254	25.2428	25.0506	25.152
Q9NRM2	ZN277_HUMAN	ZNF277	Zinc finger protein 277 OS=Homo sapiens OX=9606 GN=ZNF277 PE=1 SV=2	52.788	450	1.05905	0.0827716	0.66041	0.990959	4	17.6422	17.8886	17.5772	17.788
O15144	ARPC2_HUMAN	ARPC2	Actin-related protein 2/3 complex subunit 2 OS=Homo sapiens OX=9606 GN=ARPC2 PE=1 SV=1	34.333	300	1.05905	0.0827685	0.218582	0.990959	4	23.8893	23.8902	23.7602	23.8537
O14745	NHRF1_HUMAN	SLC9A3R1	Na(+)/H(+) exchange regulatory cofactor NHE-RF1 OS=Homo sapiens OX=9606 GN=SLC9A3R1 PE=1 SV=4	38.868	358	1.05894	0.082624	0.334046	0.990959	4	22.5286	22.5265	22.3795	22.5104
Q969X5	ERGI1_HUMAN	ERGIC1	Endoplasmic reticulum-Golgi intermediate compartment protein 1 OS=Homo sapiens OX=9606 GN=ERGIC1 PE=1 SV=1	32.592	290	1.0589	0.0825651	0.193897	0.990959	4	23.0944	23.0629	22.9562	23.036
Q9UBQ6	EXTL2_HUMAN	EXTL2	Exostosin-like 2 OS=Homo sapiens OX=9606 GN=EXTL2 PE=1 SV=1	37.466	330	1.0589	0.0825629	0.581027	0.990959	4	19.1526	18.9021	18.9269	18.9627
Q9BYG5	PAR6B_HUMAN	PARD6B	Partitioning defective 6 homolog beta OS=Homo sapiens OX=9606 GN=PARD6B PE=1 SV=1	41.182	372	1.05888	0.0825378	0.826349	0.993107	4	18.3917	18.9469	18.767	18.4065
Q96EH3	MASU1_HUMAN	MALSU1	Mitochondrial assembly of ribosomal large subunit protein 1 OS=Homo sapiens OX=9606 GN=MALSU1 PE=1 SV=1	26.17	234	1.05883	0.0824691	0.870881	0.998138	4	17.0247	17.0115	17.3834	16.4878
Q9UNN5	FAF1_HUMAN	FAF1	FAS-associated factor 1 OS=Homo sapiens OX=9606 GN=FAF1 PE=1 SV=2	73.954	650	1.05882	0.0824627	0.411099	0.990959	4	21.322	21.3709	21.1878	21.3402
Q9Y519	T184B_HUMAN	TMEM184B	Transmembrane protein 184B OS=Homo sapiens OX=9606 GN=TMEM184B PE=1 SV=2	45.562	407	1.05882	0.0824622	0.6879	0.990959	4	17.6724	17.733	17.7951	17.4453
Q9H668	STN1_HUMAN	STN1	CST complex subunit STN1 OS=Homo sapiens OX=9606 GN=STN1 PE=1 SV=2	42.119	368	1.05873	0.0823361	0.55188	0.990959	4	18.1419	18.2505	18.0112	18.2166
Q9BXJ8	TACAN_HUMAN	TMEM120A	Ion channel TACAN OS=Homo sapiens OX=9606 GN=TMEM120A PE=1 SV=1	40.61	343	1.05863	0.0822016	0.708889	0.990959	4	17.9733	18.305	18.1518	17.9621
Q14865	ARI5B_HUMAN	ARID5B	AT-rich interactive domain-containing protein 5B OS=Homo sapiens OX=9606 GN=ARID5B PE=1 SV=3	132.375	1188	1.05858	0.0821297	0.802189	0.993107	4	15.8394	16.3784	16.1277	15.9259
Q8NC42	RN149_HUMAN	RNF149	E3 ubiquitin-protein ligase RNF149 OS=Homo sapiens OX=9606 GN=RNF149 PE=2 SV=2	43.165	400	1.05846	0.0819621	0.472939	0.990959	4	20.6501	20.6216	20.4615	20.6463
P27816	MAP4_HUMAN	MAP4	Microtubule-associated protein 4 OS=Homo sapiens OX=9606 GN=MAP4 PE=1 SV=3	121.005	1152	1.05846	0.0819599	0.411412	0.990959	4	23.5629	23.6387	23.4488	23.5888
O14503	BHE40_HUMAN	BHLHE40	Class E basic helix-loop-helix protein 40 OS=Homo sapiens OX=9606 GN=BHLHE40 PE=1 SV=1	45.51	412	1.05842	0.0819186	0.826514	0.993107	4	16.8482	16.3402	16.7211	16.3034
Q8NBP7	PCSK9_HUMAN	PCSK9	Proprotein convertase subtilisin/kexin type 9 OS=Homo sapiens OX=9606 GN=PCSK9 PE=1 SV=3	74.286	692	1.05839	0.0818713	0.421919	0.990959	4	18.7911	18.782	18.6231	18.7863
Q969X6	UTP4_HUMAN	UTP4	U3 small nucleolar RNA-associated protein 4 homolog OS=Homo sapiens OX=9606 GN=UTP4 PE=1 SV=1	76.89	686	1.05839	0.0818654	0.276159	0.990959	4	21.074	21.1839	21.0423	21.0518
Q02878	RL6_HUMAN	RPL6	60S ribosomal protein L6 OS=Homo sapiens OX=9606 GN=RPL6 PE=1 SV=3	32.728	288	1.05832	0.081773	0.436246	0.990959	4	25.8199	25.6588	25.6312	25.6839
Q0ZGT2	NEXN_HUMAN	NEXN	Nexilin OS=Homo sapiens OX=9606 GN=NEXN PE=1 SV=1	80.658	675	1.0583	0.0817426	0.354332	0.990959	4	18.9922	18.92	18.9324	18.8163
O15231	ZN185_HUMAN	ZNF185	Zinc finger protein 185 OS=Homo sapiens OX=9606 GN=ZNF185 PE=1 SV=3	73.525	689	1.05817	0.0815769	0.827697	0.993107	4	15.7406	15.3365	15.1963	15.7176
Q9Y282	ERGI3_HUMAN	ERGIC3	Endoplasmic reticulum-Golgi intermediate compartment protein 3 OS=Homo sapiens OX=9606 GN=ERGIC3 PE=1 SV=1	43.222	383	1.05816	0.0815576	0.261563	0.990959	4	21.7621	21.8607	21.7113	21.7483
Q9BVJ7	DUS23_HUMAN	DUSP23	Dual specificity protein phosphatase 23 OS=Homo sapiens OX=9606 GN=DUSP23 PE=1 SV=1	16.588	150	1.05814	0.0815251	0.344155	0.990959	4	19.5782	19.6826	19.5079	19.5899
Q9UI10	EI2BD_HUMAN	EIF2B4	Translation initiation factor eIF-2B subunit delta OS=Homo sapiens OX=9606 GN=EIF2B4 PE=1 SV=2	57.557	523	1.05797	0.0813023	0.068601	0.990959	4	20.1104	20.1212	20.0127	20.0563
Q8TB52	FBX30_HUMAN	FBXO30	F-box only protein 30 OS=Homo sapiens OX=9606 GN=FBXO30 PE=1 SV=3	82.304	745	1.05796	0.0812869	0.529652	0.990959	4	19.6027	19.5879	19.4065	19.6216
Q92541	RTF1_HUMAN	RTF1	RNA polymerase-associated protein RTF1 homolog OS=Homo sapiens OX=9606 GN=RTF1 PE=1 SV=4	80.313	710	1.05796	0.0812788	0.173721	0.990959	4	21.724	21.7305	21.6069	21.685
P43897	EFTS_HUMAN	TSFM	Elongation factor Ts, mitochondrial OS=Homo sapiens OX=9606 GN=TSFM PE=1 SV=2	35.391	325	1.05792	0.0812346	0.729033	0.990959	4	21.4238	21.7605	21.3956	21.6263
Q9UK99	FBX3_HUMAN	FBXO3	F-box only protein 3 OS=Homo sapiens OX=9606 GN=FBXO3 PE=1 SV=3	54.561	471	1.0579	0.0811991	0.671233	0.990959	4	19.3352	19.402	19.1259	19.4489
Q92538	GBF1_HUMAN	GBF1	Golgi-specific brefeldin A-resistance guanine nucleotide exchange factor 1 OS=Homo sapiens OX=9606 GN=GBF1 PE=1 SV=2	206.446	1859	1.05788	0.0811777	0.122958	0.990959	4	20.5312	20.4709	20.4111	20.4287
P60900	PSA6_HUMAN	PSMA6	Proteasome subunit alpha type-6 OS=Homo sapiens OX=9606 GN=PSMA6 PE=1 SV=1	27.399	246	1.05787	0.0811647	0.826273	0.993107	4	21.8944	22.2582	21.7254	22.2648
Q6IAA8	LTOR1_HUMAN	LAMTOR1	Ragulator complex protein LAMTOR1 OS=Homo sapiens OX=9606 GN=LAMTOR1 PE=1 SV=2	17.745	161	1.05784	0.0811171	0.435787	0.990959	4	21.8598	21.7639	21.6618	21.7996
Q8IYR2	SMYD4_HUMAN	SMYD4	SET and MYND domain-containing protein 4 OS=Homo sapiens OX=9606 GN=SMYD4 PE=2 SV=3	89.225	804	1.0578	0.0810662	0.198568	0.990959	4	17.4138	17.3283	17.2911	17.2889
P15848	ARSB_HUMAN	ARSB	Arylsulfatase B OS=Homo sapiens OX=9606 GN=ARSB PE=1 SV=1	59.687	533	1.05779	0.0810524	0.668343	0.990959	4	16.5004	16.193	16.3201	16.2112
Q15573	TAF1A_HUMAN	TAF1A	TATA box-binding protein-associated factor RNA polymerase I subunit A OS=Homo sapiens OX=9606 GN=TAF1A PE=1 SV=1	52.676	450	1.05776	0.0810096	0.61781	0.990959	4	16.2971	16.0609	16.1704	16.0257
P01857	IGHG1_HUMAN	IGHG1	Immunoglobulin heavy constant gamma 1 OS=Homo sapiens OX=9606 GN=IGHG1 PE=1 SV=1	36.106	330	1.05775	0.0810042	0.89118	1	4	19.2384	19.576	18.8309	19.8214
P61599	NAA20_HUMAN	NAA20	N-alpha-acetyltransferase 20 OS=Homo sapiens OX=9606 GN=NAA20 PE=1 SV=1	20.368	178	1.05774	0.0809809	0.550282	0.990959	4	19.8545	19.8705	19.6681	19.8949
P12004	PCNA_HUMAN	PCNA	Proliferating cell nuclear antigen OS=Homo sapiens OX=9606 GN=PCNA PE=1 SV=1	28.769	261	1.05767	0.0808838	0.594874	0.990959	4	24.0811	24.0763	23.8687	24.1268
Q9UEG4	ZN629_HUMAN	ZNF629	Zinc finger protein 629 OS=Homo sapiens OX=9606 GN=ZNF629 PE=1 SV=2	96.62	869	1.05759	0.080782	0.762809	0.992261	4	17.8016	18.1459	17.7346	18.0514
Q96AC6	KIFC2_HUMAN	KIFC2	Kinesin-like protein KIFC2 OS=Homo sapiens OX=9606 GN=KIFC2 PE=2 SV=1	90.147	838	1.05752	0.0806873	0.531932	0.990959	4	17.9224	17.7713	17.843	17.6894
Q9UN86	G3BP2_HUMAN	G3BP2	Ras GTPase-activating protein-binding protein 2 OS=Homo sapiens OX=9606 GN=G3BP2 PE=1 SV=2	54.121	482	1.05751	0.0806747	0.286192	0.990959	4	22.2919	22.4	22.2799	22.2507
Q4J6C6	PPCEL_HUMAN	PREPL	Prolyl endopeptidase-like OS=Homo sapiens OX=9606 GN=PREPL PE=1 SV=1	83.927	727	1.0575	0.0806556	0.355959	0.990959	4	20.2142	20.3241	20.1489	20.2281
P11166	GTR1_HUMAN	SLC2A1	Solute carrier family 2, facilitated glucose transporter member 1 OS=Homo sapiens OX=9606 GN=SLC2A1 PE=1 SV=2	54.084	492	1.05747	0.0806165	0.411608	0.990959	4	22.6937	22.8473	22.6744	22.7054
O15243	OBRG_HUMAN	LEPROT	Leptin receptor gene-related protein OS=Homo sapiens OX=9606 GN=LEPROT PE=1 SV=1	14.254	131	1.05722	0.0802723	0.768739	0.992261	4	17.4591	17.9202	17.5472	17.6716
Q9BV81	EMC6_HUMAN	EMC6	ER membrane protein complex subunit 6 OS=Homo sapiens OX=9606 GN=EMC6 PE=1 SV=1	12.017	110	1.05717	0.0802014	0.723881	0.990959	4	19.1683	19.2531	18.9377	19.3233
Q9Y262	EIF3L_HUMAN	EIF3L	Eukaryotic translation initiation factor 3 subunit L OS=Homo sapiens OX=9606 GN=EIF3L PE=1 SV=1	66.727	564	1.05714	0.0801664	0.525411	0.990959	4	22.684	22.5763	22.4597	22.6402
Q00978	IRF9_HUMAN	IRF9	Interferon regulatory factor 9 OS=Homo sapiens OX=9606 GN=IRF9 PE=1 SV=1	43.696	393	1.05707	0.0800684	0.876198	0.998138	4	17.7171	17.7741	18.1184	17.2126
Q00722	PLCB2_HUMAN	PLCB2	1-phosphatidylinositol 4,5-bisphosphate phosphodiesterase beta-2 OS=Homo sapiens OX=9606 GN=PLCB2 PE=1 SV=2	134.024	1185	1.05701	0.0799856	0.648587	0.990959	4	16.7424	16.577	16.4537	16.7056
Q86UD0	SAPC2_HUMAN	SAPCD2	Suppressor APC domain-containing protein 2 OS=Homo sapiens OX=9606 GN=SAPCD2 PE=1 SV=2	42.637	394	1.05699	0.079965	0.178045	0.990959	4	17.3852	17.4558	17.3236	17.3576
Q9NYD6	HXC10_HUMAN	HOXC10	Homeobox protein Hox-C10 OS=Homo sapiens OX=9606 GN=HOXC10 PE=1 SV=2	38.073	342	1.05697	0.0799345	0.668262	0.990959	4	17.9244	18.1603	18.0716	17.8533
Q7L1W4	LRC8D_HUMAN	LRRC8D	Volume-regulated anion channel subunit LRRC8D OS=Homo sapiens OX=9606 GN=LRRC8D PE=1 SV=1	98.201	858	1.05697	0.079933	0.0390626	0.990959	4	19.1148	19.1355	19.0578	19.0327
P16220	CREB1_HUMAN	CREB1	Cyclic AMP-responsive element-binding protein 1 OS=Homo sapiens OX=9606 GN=CREB1 PE=1 SV=3	35.136	327	1.05696	0.0799212	0.549148	0.990959	4	19.9082	20.1126	19.8849	19.976
Q6ZS17	RIPR1_HUMAN	RIPOR1	Rho family-interacting cell polarization regulator 1 OS=Homo sapiens OX=9606 GN=RIPOR1 PE=1 SV=1	132.308	1223	1.05688	0.079814	0.263254	0.990959	4	19.1213	19.2209	19.1055	19.077
Q8N5P1	ZC3H8_HUMAN	ZC3H8	Zinc finger CCCH domain-containing protein 8 OS=Homo sapiens OX=9606 GN=ZC3H8 PE=1 SV=2	33.576	291	1.05675	0.0796383	0.0141652	0.990959	4	18.5739	18.5778	18.5056	18.4868
Q6NZ67	MZT2B_HUMAN	MZT2B	Mitotic-spindle organizing protein 2B OS=Homo sapiens OX=9606 GN=MZT2B PE=1 SV=1	16.226	158	1.05673	0.0796114	0.71244	0.990959	4	19.197	18.9699	19.153	18.8547
Q969J3	BORC5_HUMAN	BORCS5	BLOC-1-related complex subunit 5 OS=Homo sapiens OX=9606 GN=BORCS5 PE=1 SV=1	22.222	196	1.0567	0.0795706	0.626467	0.990959	4	17.5093	17.3631	17.4757	17.2376
Q5SRI9	MANEA_HUMAN	MANEA	Glycoprotein endo-alpha-1,2-mannosidase OS=Homo sapiens OX=9606 GN=MANEA PE=1 SV=1	53.671	462	1.0567	0.0795701	0.921883	1	4	15.9673	14.5797	15.379	15.0088
Q9NWQ9	CN119_HUMAN	C14orf119	Uncharacterized protein C14orf119 OS=Homo sapiens OX=9606 GN=C14orf119 PE=1 SV=1	16.009	140	1.05664	0.0794892	0.422806	0.990959	4	17.7292	17.7304	17.7298	17.5708
Q8N565	MREG_HUMAN	MREG	Melanoregulin OS=Homo sapiens OX=9606 GN=MREG PE=1 SV=1	24.927	214	1.05662	0.0794633	0.759291	0.99164	4	16.4564	16.2609	16.0748	16.4836
P61966	AP1S1_HUMAN	AP1S1	AP-1 complex subunit sigma-1A OS=Homo sapiens OX=9606 GN=AP1S1 PE=1 SV=1	18.733	158	1.05662	0.0794607	0.870605	0.998138	4	17.3212	17.6234	16.9896	17.7961
P10768	ESTD_HUMAN	ESD	S-formylglutathione hydrolase OS=Homo sapiens OX=9606 GN=ESD PE=1 SV=2	31.463	282	1.0566	0.0794268	0.68568	0.990959	4	21.9142	21.9067	21.6614	22.0006
Q9NWT1	PK1IP_HUMAN	PAK1IP1	p21-activated protein kinase-interacting protein 1 OS=Homo sapiens OX=9606 GN=PAK1IP1 PE=1 SV=2	43.964	392	1.05658	0.0794087	0.506945	0.990959	4	21.2291	21.3869	21.1686	21.2886
Q9P2N6	KANL3_HUMAN	KANSL3	KAT8 regulatory NSL complex subunit 3 OS=Homo sapiens OX=9606 GN=KANSL3 PE=1 SV=2	95.992	904	1.05648	0.0792718	0.310556	0.990959	4	18.3028	18.1903	18.1498	18.1847
Q9NWM8	FKB14_HUMAN	FKBP14	Peptidyl-prolyl cis-trans isomerase FKBP14 OS=Homo sapiens OX=9606 GN=FKBP14 PE=1 SV=1	24.172	211	1.05631	0.0790306	0.741082	0.990959	4	20.7389	20.3242	20.4742	20.431
P51157	RAB28_HUMAN	RAB28	Ras-related protein Rab-28 OS=Homo sapiens OX=9606 GN=RAB28 PE=1 SV=2	24.841	221	1.05618	0.0788535	0.831727	0.993107	4	15.5745	15.8778	15.9366	15.358
Q9H0A0	NAT10_HUMAN	NAT10	RNA cytidine acetyltransferase OS=Homo sapiens OX=9606 GN=NAT10 PE=1 SV=2	115.73	1025	1.05615	0.0788214	0.459093	0.990959	4	23.2037	23.0888	23.0025	23.1324
Q9BTX7	TTPAL_HUMAN	TTPAL	Alpha-tocopherol transfer protein-like OS=Homo sapiens OX=9606 GN=TTPAL PE=1 SV=2	38.515	342	1.05615	0.078821	0.584037	0.990959	4	19.2069	19.0956	19.1808	18.964
P98175	RBM10_HUMAN	RBM10	RNA-binding protein 10 OS=Homo sapiens OX=9606 GN=RBM10 PE=1 SV=3	103.533	930	1.05605	0.0786802	0.059902	0.990959	4	21.442	21.4637	21.3571	21.3912
O43324	MCA3_HUMAN	EEF1E1	Eukaryotic translation elongation factor 1 epsilon-1 OS=Homo sapiens OX=9606 GN=EEF1E1 PE=1 SV=1	19.811	174	1.05603	0.0786515	0.572063	0.990959	4	22.0816	21.971	21.844	22.0513
P08237	PFKAM_HUMAN	PFKM	ATP-dependent 6-phosphofructokinase, muscle type OS=Homo sapiens OX=9606 GN=PFKM PE=1 SV=2	85.183	780	1.05595	0.0785475	0.295988	0.990959	4	22.219	22.195	22.0737	22.1832
Q8WYP5	ELYS_HUMAN	AHCTF1	Protein ELYS OS=Homo sapiens OX=9606 GN=AHCTF1 PE=1 SV=3	252.498	2266	1.05594	0.0785234	0.385444	0.990959	4	20.0925	20.1685	19.9917	20.1122
P04424	ARLY_HUMAN	ASL	Argininosuccinate lyase OS=Homo sapiens OX=9606 GN=ASL PE=1 SV=4	51.658	464	1.05594	0.078522	0.496803	0.990959	4	18.8721	18.7397	18.6587	18.796
Q7Z3B4	NUP54_HUMAN	NUP54	Nucleoporin p54 OS=Homo sapiens OX=9606 GN=NUP54 PE=1 SV=2	55.435	507	1.05592	0.0784961	0.0665235	0.990959	4	20.3992	20.4377	20.3308	20.3491
Q8TDJ6	DMXL2_HUMAN	DMXL2	DmX-like protein 2 OS=Homo sapiens OX=9606 GN=DMXL2 PE=1 SV=2	339.641	3036	1.05581	0.0783446	0.397117	0.990959	4	18.5877	18.5868	18.4356	18.5822
Q15118	PDK1_HUMAN	PDK1	[Pyruvate dehydrogenase (acetyl-transferring)] kinase isozyme 1, mitochondrial OS=Homo sapiens OX=9606 GN=PDK1 PE=1 SV=1	49.244	436	1.05577	0.0782926	0.834803	0.993277	4	18.4515	17.8326	18.1799	17.9476
Q14161	GIT2_HUMAN	GIT2	ARF GTPase-activating protein GIT2 OS=Homo sapiens OX=9606 GN=GIT2 PE=1 SV=2	84.543	759	1.05569	0.0781811	0.205733	0.990959	4	19.6402	19.6591	19.5303	19.6127
Q9UJY4	GGA2_HUMAN	GGA2	ADP-ribosylation factor-binding protein GGA2 OS=Homo sapiens OX=9606 GN=GGA2 PE=1 SV=3	67.15	613	1.05566	0.0781408	0.709773	0.990959	4	18.9637	18.6701	18.6309	18.8466
O95721	SNP29_HUMAN	SNAP29	Synaptosomal-associated protein 29 OS=Homo sapiens OX=9606 GN=SNAP29 PE=1 SV=1	28.97	258	1.05565	0.0781352	0.599644	0.990959	4	20.0679	19.8184	19.8443	19.8857
P04150	GCR_HUMAN	NR3C1	Glucocorticoid receptor OS=Homo sapiens OX=9606 GN=NR3C1 PE=1 SV=1	85.659	777	1.05565	0.0781271	0.190303	0.990959	4	19.4226	19.4913	19.3583	19.3994
P35030	TRY3_HUMAN	PRSS3	Trypsin-3 OS=Homo sapiens OX=9606 GN=PRSS3 PE=1 SV=2	32.529	304	1.0555	0.077923	0.921837	1	4	18.9465	20.0528	18.9883	19.8553
P62316	SMD2_HUMAN	SNRPD2	Small nuclear ribonucleoprotein Sm D2 OS=Homo sapiens OX=9606 GN=SNRPD2 PE=1 SV=1	13.527	118	1.05545	0.0778642	0.461119	0.990959	4	24.2939	24.344	24.1588	24.3234
Q8IVD9	NUDC3_HUMAN	NUDCD3	NudC domain-containing protein 3 OS=Homo sapiens OX=9606 GN=NUDCD3 PE=1 SV=3	40.822	361	1.05544	0.0778508	0.674562	0.990959	4	19.5042	19.6299	19.3421	19.6363
O43824	GTPB6_HUMAN	GTPBP6	Putative GTP-binding protein 6 OS=Homo sapiens OX=9606 GN=GTPBP6 PE=2 SV=4	56.897	516	1.05539	0.0777739	0.213897	0.990959	4	19.5651	19.5973	19.4633	19.5435
P05165	PCCA_HUMAN	PCCA	Propionyl-CoA carboxylase alpha chain, mitochondrial OS=Homo sapiens OX=9606 GN=PCCA PE=1 SV=4	80.059	728	1.05539	0.077771	0.601628	0.990959	4	19.0659	18.8391	18.8184	18.9311
Q13751	LAMB3_HUMAN	LAMB3	Laminin subunit beta-3 OS=Homo sapiens OX=9606 GN=LAMB3 PE=1 SV=1	129.572	1172	1.05536	0.0777386	0.344292	0.990959	4	19.263	19.1365	19.122	19.1221
Q13325	IFIT5_HUMAN	IFIT5	Interferon-induced protein with tetratricopeptide repeats 5 OS=Homo sapiens OX=9606 GN=IFIT5 PE=1 SV=1	55.847	482	1.05534	0.0777043	0.711748	0.990959	4	20.2679	19.9409	19.9456	20.1078
Q9UI08	EVL_HUMAN	EVL	Ena/VASP-like protein OS=Homo sapiens OX=9606 GN=EVL PE=1 SV=2	44.62	416	1.05531	0.0776695	0.379902	0.990959	4	16.1816	16.2526	16.1992	16.0797
Q8NCN5	PDPR_HUMAN	PDPR	Pyruvate dehydrogenase phosphatase regulatory subunit, mitochondrial OS=Homo sapiens OX=9606 GN=PDPR PE=1 SV=2	99.364	879	1.05531	0.0776631	0.307121	0.990959	4	19.3858	19.272	19.2458	19.2567
P50148	GNAQ_HUMAN	GNAQ	Guanine nucleotide-binding protein G(q) subunit alpha OS=Homo sapiens OX=9606 GN=GNAQ PE=1 SV=4	42.142	359	1.05524	0.0775661	0.0421561	0.990959	4	21.3206	21.3356	21.2359	21.2652
Q9NRR4	RNC_HUMAN	DROSHA	Ribonuclease 3 OS=Homo sapiens OX=9606 GN=DROSHA PE=1 SV=2	159.316	1374	1.05522	0.0775461	0.0652308	0.990959	4	18.6945	18.6546	18.6031	18.591
O00231	PSD11_HUMAN	PSMD11	26S proteasome non-ATPase regulatory subunit 11 OS=Homo sapiens OX=9606 GN=PSMD11 PE=1 SV=3	47.464	422	1.05519	0.0775085	0.632951	0.990959	4	22.3888	22.4242	22.1912	22.4668
P62487	RPB7_HUMAN	POLR2G	DNA-directed RNA polymerase II subunit RPB7 OS=Homo sapiens OX=9606 GN=POLR2G PE=1 SV=1	19.294	172	1.05519	0.0775007	0.461658	0.990959	4	20.0286	20.1303	19.9328	20.071
P09525	ANXA4_HUMAN	ANXA4	Annexin A4 OS=Homo sapiens OX=9606 GN=ANXA4 PE=1 SV=4	35.883	319	1.05518	0.0774864	0.371925	0.990959	4	21.7857	21.7396	21.6213	21.749
O95613	PCNT_HUMAN	PCNT	Pericentrin OS=Homo sapiens OX=9606 GN=PCNT PE=1 SV=4	378.037	3336	1.05515	0.0774458	0.526867	0.990959	4	18.5245	18.4586	18.5106	18.3176
Q9NZQ3	SPN90_HUMAN	NCKIPSD	NCK-interacting protein with SH3 domain OS=Homo sapiens OX=9606 GN=NCKIPSD PE=1 SV=1	78.96	722	1.0551	0.0773839	0.674502	0.990959	4	18.9302	18.7115	18.8588	18.6281
Q96T58	MINT_HUMAN	SPEN	Msx2-interacting protein OS=Homo sapiens OX=9606 GN=SPEN PE=1 SV=1	402.248	3664	1.05509	0.0773701	0.42959	0.990959	4	19.8324	19.9494	19.7608	19.8663
P52756	RBM5_HUMAN	RBM5	RNA-binding protein 5 OS=Homo sapiens OX=9606 GN=RBM5 PE=1 SV=2	92.154	815	1.05509	0.0773636	0.0679139	0.990959	4	19.8908	19.8878	19.8331	19.7907
O75496	GEMI_HUMAN	GMNN	Geminin OS=Homo sapiens OX=9606 GN=GMNN PE=1 SV=1	23.565	209	1.05501	0.0772531	0.5973	0.990959	4	20.63	20.3832	20.4434	20.4153
P19623	SPEE_HUMAN	SRM	Spermidine synthase OS=Homo sapiens OX=9606 GN=SRM PE=1 SV=1	33.825	302	1.05498	0.0772126	0.718704	0.990959	4	23.1829	23.2396	22.95	23.3181
Q7Z6Z7	HUWE1_HUMAN	HUWE1	E3 ubiquitin-protein ligase HUWE1 OS=Homo sapiens OX=9606 GN=HUWE1 PE=1 SV=3	481.891	4374	1.05484	0.0770193	0.128156	0.990959	4	21.1234	21.1494	21.0317	21.0871
O95684	CEP43_HUMAN	CEP43	Centrosomal protein 43 OS=Homo sapiens OX=9606 GN=CEP43 PE=1 SV=1	43.065	399	1.05472	0.0768608	0.444708	0.990959	4	19.7082	19.5805	19.517	19.618
O14579	COPE_HUMAN	COPE	Coatomer subunit epsilon OS=Homo sapiens OX=9606 GN=COPE PE=1 SV=3	34.482	308	1.0547	0.0768382	0.476115	0.990959	4	22.8329	22.8706	22.6886	22.8612
Q9Y3B9	RRP15_HUMAN	RRP15	RRP15-like protein OS=Homo sapiens OX=9606 GN=RRP15 PE=1 SV=2	31.484	282	1.0547	0.0768346	0.412591	0.990959	4	21.3604	21.3375	21.1981	21.346
Q13740	CD166_HUMAN	ALCAM	CD166 antigen OS=Homo sapiens OX=9606 GN=ALCAM PE=1 SV=2	65.102	583	1.05468	0.0768046	0.30427	0.990959	4	21.7206	21.6085	21.5886	21.587
O95210	STBD1_HUMAN	STBD1	Starch-binding domain-containing protein 1 OS=Homo sapiens OX=9606 GN=STBD1 PE=1 SV=1	39.007	358	1.05466	0.0767752	0.748018	0.990959	4	19.2314	19.0828	19.2751	18.8855
Q86X53	ERIC1_HUMAN	ERICH1	Glutamate-rich protein 1 OS=Homo sapiens OX=9606 GN=ERICH1 PE=1 SV=1	48.984	443	1.05462	0.076723	0.538602	0.990959	4	18.4268	18.4319	18.4569	18.2483
O75127	PTCD1_HUMAN	PTCD1	Pentatricopeptide repeat-containing protein 1, mitochondrial OS=Homo sapiens OX=9606 GN=PTCD1 PE=1 SV=2	78.856	700	1.05456	0.0766433	0.462222	0.990959	4	19.6557	19.7484	19.5542	19.6966
Q9H425	CA198_HUMAN	C1orf198	Uncharacterized protein C1orf198 OS=Homo sapiens OX=9606 GN=C1orf198 PE=1 SV=1	36.346	327	1.05448	0.0765274	0.209554	0.990959	4	18.8921	18.815	18.7606	18.7935
Q56VL3	OCAD2_HUMAN	OCIAD2	OCIA domain-containing protein 2 OS=Homo sapiens OX=9606 GN=OCIAD2 PE=1 SV=1	16.954	154	1.05433	0.0763308	0.446455	0.990959	4	19.5392	19.689	19.5692	19.5064
Q92552	RT27_HUMAN	MRPS27	28S ribosomal protein S27, mitochondrial OS=Homo sapiens OX=9606 GN=MRPS27 PE=1 SV=3	47.611	414	1.05425	0.0762109	0.566798	0.990959	4	21.6694	21.6378	21.4664	21.6884
Q9NX70	MED29_HUMAN	MED29	Mediator of RNA polymerase II transcription subunit 29 OS=Homo sapiens OX=9606 GN=MED29 PE=1 SV=1	21.073	200	1.05421	0.0761565	0.572311	0.990959	4	18.5826	18.81	18.6159	18.6244
Q99832	TCPH_HUMAN	CCT7	T-complex protein 1 subunit eta OS=Homo sapiens OX=9606 GN=CCT7 PE=1 SV=2	59.367	543	1.05411	0.0760296	0.512261	0.990959	4	24.6877	24.6509	24.4989	24.6878
Q658P3	STEA3_HUMAN	STEAP3	Metalloreductase STEAP3 OS=Homo sapiens OX=9606 GN=STEAP3 PE=1 SV=2	54.601	488	1.05411	0.0760199	0.446253	0.990959	4	20.4338	20.4623	20.4516	20.2925
Q8IZL8	PELP1_HUMAN	PELP1	Proline-, glutamic acid- and leucine-rich protein 1 OS=Homo sapiens OX=9606 GN=PELP1 PE=1 SV=2	119.7	1130	1.05409	0.0760036	0.424363	0.990959	4	20.4661	20.6164	20.4518	20.4786
P49454	CENPF_HUMAN	CENPF	Centromere protein F OS=Homo sapiens OX=9606 GN=CENPF PE=1 SV=3	357.527	3114	1.05398	0.0758419	0.351295	0.990959	4	20.1298	20.1106	20.1065	19.9822
Q96P11	NSUN5_HUMAN	NSUN5	28S rRNA (cytosine-C(5))-methyltransferase OS=Homo sapiens OX=9606 GN=NSUN5 PE=1 SV=2	46.692	429	1.05378	0.0755729	0.25089	0.990959	4	20.4902	20.3962	20.3726	20.3626
[truncated: 5,532 more rows]

## Sheet: 7479
Detailed information of the proteins identified by MS.
Accession	Name	Gene	Description	Mol(kDa)	Length	pCDH-SERPINA3/pCDH-NC	log2(pCDH-SERPINA3/pCDH-NC)	P-value	P.adjust	Count	pCDH-SERPINA3 1	pCDH-SERPINA3 2	pCDH-NC 1	pCDH-NC 2
Q0VAQ4	SMAGP_HUMAN	SMAGP	Small cell adhesion glycoprotein OS=Homo sapiens OX=9606 GN=SMAGP PE=1 SV=1	10.679	97	375.241	8.55167	5.8912e-07	0.00443608	2	18.8914	18.9046	10.3463	10.3463
P01011	AACT_HUMAN	SERPINA3	Alpha-1-antichymotrypsin OS=Homo sapiens OX=9606 GN=SERPINA3 PE=1 SV=2	47.651	423	210.88	7.72028	3.90736e-05	0.0980746	2	18.1149	18.0183	10.3463	10.3463
P22079	PERL_HUMAN	LPO	Lactoperoxidase OS=Homo sapiens OX=9606 GN=LPO PE=1 SV=2	80.288	712	100.793	6.65525	0.000242177	0.227949	2	17.1052	16.898	10.3463	10.3463
P81274	GPSM2_HUMAN	GPSM2	G-protein-signaling modulator 2 OS=Homo sapiens OX=9606 GN=GPSM2 PE=1 SV=3	76.662	684	47.806	5.57912	0.00117511	0.500348	2	16.1169	15.734	10.3463	10.3463
Q96NW7	LRRC7_HUMAN	LRRC7	Leucine-rich repeat-containing protein 7 OS=Homo sapiens OX=9606 GN=LRRC7 PE=1 SV=1	172.581	1537	25.4766	4.6711	0.420256	0.990959	3	19.7577	19.5593	10.3463	19.6285
O43309	ZSC12_HUMAN	ZSCAN12	Zinc finger and SCAN domain-containing protein 12 OS=Homo sapiens OX=9606 GN=ZSCAN12 PE=1 SV=1	70.222	604	22.8635	4.51497	0.000109393	0.164746	2	14.8141	14.9085	10.3463	10.3463
P53801	PTTG_HUMAN	PTTG1IP	Pituitary tumor-transforming gene 1 protein-interacting protein OS=Homo sapiens OX=9606 GN=PTTG1IP PE=1 SV=1	20.324	180	22.8209	4.51228	0.44718	0.990959	3	19.476	19.8528	10.3463	19.9579
F8WCM5	INSR2_HUMAN	INS-IGF2	Insulin, isoform 2 OS=Homo sapiens OX=9606 GN=INS-IGF2 PE=2 SV=1	21.537	200	20.1344	4.33159	0.441466	0.990959	3	19.618	18.7982	10.3463	19.4067
P51587	BRCA2_HUMAN	BRCA2	Breast cancer type 2 susceptibility protein OS=Homo sapiens OX=9606 GN=BRCA2 PE=1 SV=3	384.202	3418	19.3967	4.27774	0.000467565	0.292716	2	14.7166	14.5315	10.3463	10.3463
Q9H2K0	IF3M_HUMAN	MTIF3	Translation initiation factor IF-3, mitochondrial OS=Homo sapiens OX=9606 GN=MTIF3 PE=1 SV=4	31.725	278	19.306	4.27098	0.242635	0.990959	3	17.2066	17.2356	15.5539	10.3463
Q9C0K3	ARP3C_HUMAN	ACTR3C	Actin-related protein 3C OS=Homo sapiens OX=9606 GN=ACTR3C PE=2 SV=1	23.712	210	17.9675	4.16732	0.371846	0.990959	3	19.0668	16.9458	17.3316	10.3463
O43791	SPOP_HUMAN	SPOP	Speckle-type POZ protein OS=Homo sapiens OX=9606 GN=SPOP PE=1 SV=1	42.132	374	16.291	4.026	0.0420009	0.990959	2	13.5201	15.2245	10.3463	10.3463
P01893	HLAH_HUMAN	HLA-H	Putative HLA class I histocompatibility antigen, alpha chain H OS=Homo sapiens OX=9606 GN=HLA-H PE=5 SV=3	40.892	362	16.2551	4.02282	0.472928	0.990959	3	19.9084	17.7436	10.3463	19.26
Q9Y4X0	AMMR1_HUMAN	AMMECR1	AMME syndrome candidate gene 1 protein OS=Homo sapiens OX=9606 GN=AMMECR1 PE=1 SV=1	35.463	333	14.5549	3.86343	0.413189	0.990959	3	18.1937	17.752	10.3463	17.8726
P11169	GTR3_HUMAN	SLC2A3	Solute carrier family 2, facilitated glucose transporter member 3 OS=Homo sapiens OX=9606 GN=SLC2A3 PE=1 SV=1	53.924	496	14.1773	3.82551	9.57013e-06	0.0360315	2	14.1837	14.16	10.3463	10.3463
P02788	TRFL_HUMAN	LTF	Lactotransferrin OS=Homo sapiens OX=9606 GN=LTF PE=1 SV=6	78.182	710	13.6868	3.77472	0.441096	0.990959	3	18.2141	17.9436	10.3463	18.2619
Q9NRJ7	PCDBG_HUMAN	PCDHB16	Protocadherin beta-16 OS=Homo sapiens OX=9606 GN=PCDHB16 PE=1 SV=3	84.983	776	13.4162	3.74591	0.184143	0.990959	3	15.984	15.9551	14.1009	10.3463
O94953	KDM4B_HUMAN	KDM4B	Lysine-specific demethylase 4B OS=Homo sapiens OX=9606 GN=KDM4B PE=1 SV=4	121.897	1096	12.8219	3.68054	0.294579	0.990959	3	16.5768	16.7053	10.3463	15.5747
P42568	AF9_HUMAN	MLLT3	Protein AF-9 OS=Homo sapiens OX=9606 GN=MLLT3 PE=1 SV=2	63.351	568	12.1075	3.59783	0.305986	0.990959	3	17.0151	16.0653	10.3463	15.5385
P07996	TSP1_HUMAN	THBS1	Thrombospondin-1 OS=Homo sapiens OX=9606 GN=THBS1 PE=1 SV=2	129.383	1170	11.8746	3.56981	0.384539	0.990959	3	17.161	17.1364	10.3463	16.8114
Q8WUQ7	CATIN_HUMAN	CACTIN	Cactin OS=Homo sapiens OX=9606 GN=CACTIN PE=1 SV=3	88.702	758	11.8628	3.56837	0.432947	0.990959	3	17.8439	17.2952	17.656	10.3463
Q969M1	TM40L_HUMAN	TOMM40L	Mitochondrial import receptor subunit TOM40B OS=Homo sapiens OX=9606 GN=TOMM40L PE=1 SV=1	33.917	308	11.2712	3.49458	0.443472	0.990959	3	17.384	17.6702	10.3463	17.7187
Q9H6K1	ILRUN_HUMAN	ILRUN	Protein ILRUN OS=Homo sapiens OX=9606 GN=ILRUN PE=1 SV=2	32.872	298	10.2862	3.36264	0.256996	0.990959	3	15.794	15.9061	14.6285	10.3463
Q9NSU2	TREX1_HUMAN	TREX1	Three-prime repair exonuclease 1 OS=Homo sapiens OX=9606 GN=TREX1 PE=1 SV=2	33.212	314	10.0857	3.33423	0.308423	0.990959	3	16.6088	15.5653	10.3463	15.1593
P31629	ZEP2_HUMAN	HIVEP2	Transcription factor HIVEP2 OS=Homo sapiens OX=9606 GN=HIVEP2 PE=1 SV=2	269.053	2446	9.86127	3.30177	0.356246	0.990959	3	16.5124	16.3314	10.3463	15.8939
P57086	SCND1_HUMAN	SCAND1	SCAN domain-containing protein 1 OS=Homo sapiens OX=9606 GN=SCAND1 PE=1 SV=1	19.082	179	9.48704	3.24596	0.445943	0.990959	3	16.9094	17.1676	17.2387	10.3463
A8MXV4	NUD19_HUMAN	NUDT19	Nucleoside diphosphate-linked moiety X motif 19 OS=Homo sapiens OX=9606 GN=NUDT19 PE=1 SV=1	42.233	375	9.21411	3.20384	0.493523	0.990959	3	17.7406	17.0417	10.3463	18.0283
Q92997	DVL3_HUMAN	DVL3	Segment polarity protein dishevelled homolog DVL-3 OS=Homo sapiens OX=9606 GN=DVL3 PE=1 SV=2	78.055	716	9.19195	3.20037	0.425558	0.990959	3	16.0226	17.3764	10.3463	16.6519
Q8N4V1	EMC5_HUMAN	MMGT1	ER membrane protein complex subunit 5 OS=Homo sapiens OX=9606 GN=MMGT1 PE=1 SV=1	14.686	131	9.12366	3.18961	0.459249	0.990959	3	17.6477	16.3129	10.3463	17.2351
Q7L266	ASGL1_HUMAN	ASRGL1	Isoaspartyl peptidase/L-asparaginase OS=Homo sapiens OX=9606 GN=ASRGL1 PE=1 SV=2	32.055	308	9.02957	3.17466	0.439139	0.990959	3	17.3469	16.2271	10.3463	16.8784
P78411	IRX5_HUMAN	IRX5	Iroquois-class homeodomain protein IRX-5 OS=Homo sapiens OX=9606 GN=IRX5 PE=1 SV=3	50.361	483	9.01682	3.17262	0.388982	0.990959	3	16.2085	16.6272	16.1441	10.3463
P00918	CAH2_HUMAN	CA2	Carbonic anhydrase 2 OS=Homo sapiens OX=9606 GN=CA2 PE=1 SV=2	29.246	260	8.80467	3.13827	0.416751	0.990959	3	16.1907	16.9168	16.4846	10.3463
A6NGU5	GGT3_HUMAN	GGT3P	Putative glutathione hydrolase 3 proenzyme OS=Homo sapiens OX=9606 GN=GGT3P PE=5 SV=2	61.502	568	8.72549	3.12524	0.468346	0.990959	3	17.0839	16.8977	10.3463	17.3848
Q96PE1	AGRA2_HUMAN	ADGRA2	Adhesion G protein-coupled receptor A2 OS=Homo sapiens OX=9606 GN=ADGRA2 PE=1 SV=2	142.647	1338	7.98323	2.99697	0.0177952	0.990959	2	12.9381	13.7485	10.3463	10.3463
O95780	ZN682_HUMAN	ZNF682	Zinc finger protein 682 OS=Homo sapiens OX=9606 GN=ZNF682 PE=2 SV=1	58.361	498	7.87395	2.97709	0.424883	0.990959	3	16.2489	16.3851	16.3336	10.3463
Q9NQB0	TF7L2_HUMAN	TCF7L2	Transcription factor 7-like 2 OS=Homo sapiens OX=9606 GN=TCF7L2 PE=1 SV=2	67.919	619	7.77984	2.95974	0.33381	0.990959	3	15.6319	15.6659	15.032	10.3463
Q6PII3	CC174_HUMAN	CCDC174	Coiled-coil domain-containing protein 174 OS=Homo sapiens OX=9606 GN=CCDC174 PE=1 SV=3	53.958	467	7.77244	2.95837	0.410064	0.990959	3	16.2565	16.0764	10.3463	16.0698
P48454	PP2BC_HUMAN	PPP3CC	Serine/threonine-protein phosphatase 2B catalytic subunit gamma isoform OS=Homo sapiens OX=9606 GN=PPP3CC PE=1 SV=3	58.129	512	7.63969	2.93351	0.499559	0.990959	3	16.3456	17.3242	10.3463	17.4565
O00506	STK25_HUMAN	STK25	Serine/threonine-protein kinase 25 OS=Homo sapiens OX=9606 GN=STK25 PE=1 SV=1	48.112	426	7.07165	2.82205	0.323906	0.990959	3	15.8471	14.6793	10.3463	14.536
Q6IQ19	CCSAP_HUMAN	CCSAP	Centriole, cilia and spindle-associated protein OS=Homo sapiens OX=9606 GN=CCSAP PE=1 SV=2	30.216	270	6.58759	2.71975	0.428431	0.990959	3	15.9687	15.6776	15.8605	10.3463
Q3ZCX4	ZN568_HUMAN	ZNF568	Zinc finger protein 568 OS=Homo sapiens OX=9606 GN=ZNF568 PE=2 SV=2	74.369	644	6.15498	2.62175	0.425872	0.990959	3	15.6999	15.5208	10.3463	15.6309
Q5T4F4	ZFY27_HUMAN	ZFYVE27	Protrudin OS=Homo sapiens OX=9606 GN=ZFYVE27 PE=1 SV=1	45.843	411	5.90008	2.56074	0.378608	0.990959	3	15.2573	15.1209	10.3463	14.9105
Q8TAS1	UHMK1_HUMAN	UHMK1	Serine/threonine-protein kinase Kist OS=Homo sapiens OX=9606 GN=UHMK1 PE=1 SV=2	46.546	419	5.79959	2.53595	0.441839	0.990959	3	15.4823	15.612	15.6761	10.3463
Q9Y6P5	SESN1_HUMAN	SESN1	Sestrin-1 OS=Homo sapiens OX=9606 GN=SESN1 PE=1 SV=2	56.557	492	5.22865	2.38644	0.4023	0.990959	3	15.0449	14.9465	14.8722	10.3463
Q9H867	MT21D_HUMAN	VCPKMT	Protein-lysine methyltransferase METTL21D OS=Homo sapiens OX=9606 GN=VCPKMT PE=1 SV=2	25.807	229	5.06321	2.34005	0.495689	0.990959	3	14.538	16.2397	10.3463	15.7513
Q92572	AP3S1_HUMAN	AP3S1	AP-3 complex subunit sigma-1 OS=Homo sapiens OX=9606 GN=AP3S1 PE=1 SV=1	21.732	193	5.05955	2.33901	0.51265	0.990959	3	15.5912	15.7051	16.2721	10.3463
Q8TD26	CHD6_HUMAN	CHD6	Chromodomain-helicase-DNA-binding protein 6 OS=Homo sapiens OX=9606 GN=CHD6 PE=1 SV=4	305.412	2715	4.9069	2.29481	0.390078	0.990959	3	14.6584	14.8367	14.5592	10.3463
O15431	COPT1_HUMAN	SLC31A1	High affinity copper uptake protein 1 OS=Homo sapiens OX=9606 GN=SLC31A1 PE=1 SV=1	21.091	190	4.88819	2.2893	0.385815	0.990959	3	14.7267	14.7044	10.3463	14.5062
Q96PZ2	F111A_HUMAN	FAM111A	Serine protease FAM111A OS=Homo sapiens OX=9606 GN=FAM111A PE=1 SV=2	70.196	611	4.35565	2.12289	0.424516	0.990959	3	14.9831	14.1369	14.528	10.3463
Q9BTK6	PAGR1_HUMAN	PAGR1	PAXIP1-associated glutamate-rich protein 1 OS=Homo sapiens OX=9606 GN=PAGR1 PE=1 SV=1	27.716	254	4.21393	2.07517	0.489397	0.990959	3	15.1037	14.6612	15.2683	10.3463
Q13105	ZBT17_HUMAN	ZBTB17	Zinc finger and BTB domain-containing protein 17 OS=Homo sapiens OX=9606 GN=ZBTB17 PE=1 SV=3	87.928	803	4.20114	2.07078	0.472927	0.990959	3	14.7734	14.7825	15.0681	10.3463
Q9P1U0	RPA12_HUMAN	POLR1H	DNA-directed RNA polymerase I subunit RPA12 OS=Homo sapiens OX=9606 GN=POLR1H PE=1 SV=1	13.904	126	3.86095	1.94896	0.320065	0.990959	3	13.716	13.8442	10.3463	13.316
Q96SA4	SERC2_HUMAN	SERINC2	Serine incorporator 2 OS=Homo sapiens OX=9606 GN=SERINC2 PE=2 SV=3	50.742	455	3.83241	1.93825	0.432719	0.990959	3	14.1715	14.3718	10.3463	14.3205
Q9NVS2	RT18A_HUMAN	MRPS18A	39S ribosomal protein S18a, mitochondrial OS=Homo sapiens OX=9606 GN=MRPS18A PE=1 SV=1	22.184	196	3.81838	1.93296	0.636628	0.990959	3	16.3187	15.1505	17.257	10.3463
Q9Y4A0	JERKL_HUMAN	JRKL	Jerky protein homolog-like OS=Homo sapiens OX=9606 GN=JRKL PE=2 SV=2	59.912	524	3.69535	1.88571	0.489244	0.990959	3	14.4241	14.5276	14.834	10.3463
O94921	CDK14_HUMAN	CDK14	Cyclin-dependent kinase 14 OS=Homo sapiens OX=9606 GN=CDK14 PE=1 SV=3	53.057	469	3.59076	1.84429	0.573535	0.990959	3	15.7562	13.799	10.3463	15.5204
P52824	DGKQ_HUMAN	DGKQ	Diacylglycerol kinase theta OS=Homo sapiens OX=9606 GN=DGKQ PE=1 SV=2	101.155	942	3.52741	1.81861	0.490055	0.990959	3	14.603	14.0268	14.6463	10.3463
Q13882	PTK6_HUMAN	PTK6	Protein-tyrosine kinase 6 OS=Homo sapiens OX=9606 GN=PTK6 PE=1 SV=1	51.834	451	3.40502	1.76766	0.580404	0.990959	3	14.0925	15.3863	15.5972	10.3463
Q9NRY2	SOSSC_HUMAN	INIP	SOSS complex subunit C OS=Homo sapiens OX=9606 GN=INIP PE=1 SV=1	11.425	104	3.25153	1.70112	0.600493	0.990959	4	18.7819	13.4969	13.6408	15.2357
Q96JN0	LCOR_HUMAN	LCOR	Ligand-dependent corepressor OS=Homo sapiens OX=9606 GN=LCOR PE=1 SV=2	47.007	433	3.16033	1.66007	0.499721	0.990959	3	14.1017	13.9723	14.4076	10.3463
Q8N5C8	TAB3_HUMAN	TAB3	TGF-beta-activated kinase 1 and MAP3K7-binding protein 3 OS=Homo sapiens OX=9606 GN=TAB3 PE=1 SV=3	78.653	712	3.07438	1.6203	0.566539	0.990959	3	15.1814	12.973	10.3463	14.5675
O60906	NSMA_HUMAN	SMPD2	Sphingomyelin phosphodiesterase 2 OS=Homo sapiens OX=9606 GN=SMPD2 PE=1 SV=2	47.646	423	3.01837	1.59377	0.295113	0.990959	4	15.4642	15.5182	12.7637	15.0311
Q9ULC8	ZDHC8_HUMAN	ZDHHC8	Palmitoyltransferase ZDHHC8 OS=Homo sapiens OX=9606 GN=ZDHHC8 PE=1 SV=3	81.443	765	2.75198	1.46047	0.328947	0.990959	4	18.6937	18.7664	16.1292	18.41
P37840	SYUA_HUMAN	SNCA	Alpha-synuclein OS=Homo sapiens OX=9606 GN=SNCA PE=1 SV=1	14.46	140	2.72565	1.4466	0.243749	0.990959	4	15.2369	14.9524	14.5215	12.7746
Q9P0S9	TM14C_HUMAN	TMEM14C	Transmembrane protein 14C OS=Homo sapiens OX=9606 GN=TMEM14C PE=1 SV=1	11.565	112	2.69247	1.42893	0.375907	0.990959	4	19.4582	19.8499	16.9753	19.4748
Q9Y241	HIG1A_HUMAN	HIGD1A	HIG1 domain family member 1A, mitochondrial OS=Homo sapiens OX=9606 GN=HIGD1A PE=1 SV=1	10.143	93	2.63569	1.39818	0.53391	0.990959	4	18.6907	19.3769	15.7905	19.4807
P41220	RGS2_HUMAN	RGS2	Regulator of G-protein signaling 2 OS=Homo sapiens OX=9606 GN=RGS2 PE=1 SV=1	24.382	211	2.63023	1.39519	0.0196111	0.990959	4	17.4244	17.7037	16.0281	16.3096
P17036	ZNF3_HUMAN	ZNF3	Zinc finger protein 3 OS=Homo sapiens OX=9606 GN=ZNF3 PE=1 SV=3	50.916	446	2.56536	1.35916	0.327916	0.990959	4	14.6069	14.6529	12.2121	14.3294
Q9Y3V2	RWDD3_HUMAN	RWDD3	RWD domain-containing protein 3 OS=Homo sapiens OX=9606 GN=RWDD3 PE=1 SV=4	30.544	267	2.53254	1.34058	0.653791	0.990959	3	14.9372	13.3092	15.219	10.3463
P11831	SRF_HUMAN	SRF	Serum response factor OS=Homo sapiens OX=9606 GN=SRF PE=1 SV=1	51.593	508	2.4981	1.32083	0.385686	0.990959	4	16.3097	16.6038	16.3265	13.9453
O75394	RM33_HUMAN	MRPL33	39S ribosomal protein L33, mitochondrial OS=Homo sapiens OX=9606 GN=MRPL33 PE=1 SV=1	7.619	65	2.4158	1.2725	0.403567	0.990959	4	19.5042	18.4816	16.6228	18.8181
Q8N4Q0	PTGR3_HUMAN	ZADH2	Prostaglandin reductase 3 OS=Homo sapiens OX=9606 GN=ZADH2 PE=1 SV=1	40.14	377	2.37876	1.25021	0.418958	0.990959	3	12.1022	13.2731	10.3463	12.5286
Q8IYS0	ASTRC_HUMAN	GRAMD1C	Protein Aster-C OS=Homo sapiens OX=9606 GN=GRAMD1C PE=1 SV=2	76.035	662	2.28961	1.1951	0.537336	0.990959	4	20.4897	19.2256	17.1717	20.1534
Q9BT40	INP5K_HUMAN	INPP5K	Inositol polyphosphate 5-phosphatase K OS=Homo sapiens OX=9606 GN=INPP5K PE=1 SV=3	51.09	448	2.28256	1.19065	0.310289	0.990959	4	17.0338	15.4772	14.6459	15.4838
P62072	TIM10_HUMAN	TIMM10	Mitochondrial import inner membrane translocase subunit Tim10 OS=Homo sapiens OX=9606 GN=TIMM10 PE=1 SV=1	10.333	90	2.23101	1.1577	0.319785	0.990959	4	20.9513	20.5752	18.7436	20.4674
Q8IUR5	TMTC1_HUMAN	TMTC1	Protein O-mannosyl-transferase TMTC1 OS=Homo sapiens OX=9606 GN=TMTC1 PE=1 SV=3	98.847	882	2.20012	1.13758	0.228874	0.990959	4	15.6362	15.4667	15.0726	13.7551
Q14517	FAT1_HUMAN	FAT1	Protocadherin Fat 1 OS=Homo sapiens OX=9606 GN=FAT1 PE=1 SV=2	506.273	4588	2.1846	1.12737	0.0870174	0.990959	4	16.5302	15.8888	14.927	15.2373
Q9NWQ4	GPT2L_HUMAN	GPATCH2L	G patch domain-containing protein 2-like OS=Homo sapiens OX=9606 GN=GPATCH2L PE=1 SV=3	54.26	482	2.17545	1.12131	0.171065	0.990959	4	15.4635	14.6895	13.5857	14.3246
P18847	ATF3_HUMAN	ATF3	Cyclic AMP-dependent transcription factor ATF-3 OS=Homo sapiens OX=9606 GN=ATF3 PE=1 SV=2	20.576	181	2.14772	1.1028	0.0656466	0.990959	4	15.5541	15.2655	14.0469	14.567
Q5EBL8	PDZ11_HUMAN	PDZD11	PDZ domain-containing protein 11 OS=Homo sapiens OX=9606 GN=PDZD11 PE=1 SV=2	16.131	140	2.11738	1.08228	0.344698	0.990959	4	19.5407	17.928	18.0099	17.2943
Q99551	MTEF1_HUMAN	MTERF1	Transcription termination factor 1, mitochondrial OS=Homo sapiens OX=9606 GN=MTERF1 PE=1 SV=1	45.778	399	2.09764	1.06877	0.0361948	0.990959	4	16.5986	16.5977	15.3203	15.7384
Q9P0M6	H2AW_HUMAN	MACROH2A2	Core histone macro-H2A.2 OS=Homo sapiens OX=9606 GN=MACROH2A2 PE=1 SV=3	40.058	372	2.06109	1.0434	0.383752	0.990959	4	21.0697	20.8769	18.992	20.8679
A5D8V6	VP37C_HUMAN	VPS37C	Vacuolar protein sorting-associated protein 37C OS=Homo sapiens OX=9606 GN=VPS37C PE=1 SV=2	38.659	355	2.05319	1.03787	0.235154	0.990959	4	19.754	18.919	18.7545	17.8428
O43542	XRCC3_HUMAN	XRCC3	DNA repair protein XRCC3 OS=Homo sapiens OX=9606 GN=XRCC3 PE=1 SV=1	37.85	346	2.03832	1.02738	0.166897	0.990959	4	17.0813	17.97	16.3108	16.6858
Q8TCC3	RM30_HUMAN	MRPL30	39S ribosomal protein L30, mitochondrial OS=Homo sapiens OX=9606 GN=MRPL30 PE=1 SV=1	18.546	161	2.03391	1.02426	0.33899	0.990959	4	19.1192	18.8173	18.7522	17.1358
O75817	POP7_HUMAN	POP7	Ribonuclease P protein subunit p20 OS=Homo sapiens OX=9606 GN=POP7 PE=1 SV=2	15.651	140	2.03193	1.02285	0.298515	0.990959	4	18.4097	18.4886	16.6926	18.1601
P31270	HXA11_HUMAN	HOXA11	Homeobox protein Hox-A11 OS=Homo sapiens OX=9606 GN=HOXA11 PE=2 SV=2	34.486	313	2.01961	1.01408	0.00338872	0.823132	4	15.5612	15.6491	14.5514	14.6307
P45983	MK08_HUMAN	MAPK8	Mitogen-activated protein kinase 8 OS=Homo sapiens OX=9606 GN=MAPK8 PE=1 SV=2	48.296	427	2.01908	1.0137	0.357682	0.990959	4	17.5393	17.5672	15.6844	17.3947
Q13495	MAMD1_HUMAN	MAMLD1	Mastermind-like domain-containing protein 1 OS=Homo sapiens OX=9606 GN=MAMLD1 PE=1 SV=2	83.231	774	2.01824	1.0131	0.209492	0.990959	4	15.4677	15.143	13.7615	14.823
Q92743	HTRA1_HUMAN	HTRA1	Serine protease HTRA1 OS=Homo sapiens OX=9606 GN=HTRA1 PE=1 SV=1	51.287	480	2.00455	1.00328	0.081798	0.990959	4	14.3455	14.7884	13.775	13.3524
P24158	PRTN3_HUMAN	PRTN3	Myeloblastin OS=Homo sapiens OX=9606 GN=PRTN3 PE=1 SV=3	27.807	256	2.00416	1.00299	0.0219456	0.990959	4	17.8931	18.1892	17.0684	17.008
Q8N5Z0	AADAT_HUMAN	AADAT	Kynurenine/alpha-aminoadipate aminotransferase, mitochondrial OS=Homo sapiens OX=9606 GN=AADAT PE=1 SV=2	47.352	425	1.98987	0.992672	0.220325	0.990959	4	17.3236	16.7114	15.5514	16.4983
Q16760	DGKD_HUMAN	DGKD	Diacylglycerol kinase delta OS=Homo sapiens OX=9606 GN=DGKD PE=1 SV=4	134.526	1214	1.9828	0.987538	0.429892	0.990959	4	14.2427	13.329	13.6949	11.9017
Q13093	PAFA_HUMAN	PLA2G7	Platelet-activating factor acetylhydrolase OS=Homo sapiens OX=9606 GN=PLA2G7 PE=1 SV=1	50.077	441	1.96891	0.9774	0.278463	0.990959	4	16.963	17.2108	15.4579	16.761
Q8NBA8	DTWD2_HUMAN	DTWD2	tRNA-uridine aminocarboxypropyltransferase 2 OS=Homo sapiens OX=9606 GN=DTWD2 PE=1 SV=1	33.416	298	1.95906	0.970162	0.0668117	0.990959	4	16.8452	17.034	15.7227	16.2162
Q9UJT1	TBD_HUMAN	TUBD1	Tubulin delta chain OS=Homo sapiens OX=9606 GN=TUBD1 PE=2 SV=2	51.034	453	1.9398	0.955905	0.233391	0.990959	4	15.0868	15.7173	14.9164	13.9759
Q8ND25	ZNRF1_HUMAN	ZNRF1	E3 ubiquitin-protein ligase ZNRF1 OS=Homo sapiens OX=9606 GN=ZNRF1 PE=1 SV=2	23.783	227	1.92946	0.9482	0.191027	0.990959	4	15.4959	15.1813	14.8515	13.9293
Q6UB99	ANR11_HUMAN	ANKRD11	Ankyrin repeat domain-containing protein 11 OS=Homo sapiens OX=9606 GN=ANKRD11 PE=1 SV=3	297.913	2663	1.91195	0.935047	0.0560385	0.990959	4	16.1121	16.4123	15.503	15.1514
Q15776	ZKSC8_HUMAN	ZKSCAN8	Zinc finger protein with KRAB and SCAN domains 8 OS=Homo sapiens OX=9606 GN=ZKSCAN8 PE=1 SV=2	65.816	578	1.9097	0.933349	0.399287	0.990959	4	16.7101	16.2409	14.6957	16.3885
Q96I36	COX14_HUMAN	COX14	Cytochrome c oxidase assembly protein COX14 OS=Homo sapiens OX=9606 GN=COX14 PE=1 SV=1	6.6	57	1.90839	0.932359	0.416631	0.990959	4	19.0413	18.0873	16.8477	18.4162
O14713	ITBP1_HUMAN	ITGB1BP1	Integrin beta-1-binding protein 1 OS=Homo sapiens OX=9606 GN=ITGB1BP1 PE=1 SV=1	21.782	200	1.9031	0.928348	0.100424	0.990959	4	16.6408	16.6263	15.3866	16.0238
Q96BR1	SGK3_HUMAN	SGK3	Serine/threonine-protein kinase Sgk3 OS=Homo sapiens OX=9606 GN=SGK3 PE=1 SV=1	57.108	496	1.90104	0.926786	0.0759994	0.990959	4	15.5275	15.765	14.4757	14.9633
Q9GZU3	TM39B_HUMAN	TMEM39B	Transmembrane protein 39B OS=Homo sapiens OX=9606 GN=TMEM39B PE=1 SV=1	56.274	492	1.89918	0.925378	0.539671	0.990959	4	14.0002	13.1474	13.8361	11.4608
Q9NZV1	CRIM1_HUMAN	CRIM1	Cysteine-rich motor neuron 1 protein OS=Homo sapiens OX=9606 GN=CRIM1 PE=1 SV=1	113.738	1036	1.88381	0.913656	0.220141	0.990959	4	15.8456	14.8186	14.4905	14.3465
P13284	GILT_HUMAN	IFI30	Gamma-interferon-inducible lysosomal thiol reductase OS=Homo sapiens OX=9606 GN=IFI30 PE=1 SV=3	27.964	250	1.86965	0.902765	0.0152421	0.990959	4	16.8878	16.7158	15.972	15.8261
Q9NRW3	ABC3C_HUMAN	APOBEC3C	DNA dC->dU-editing enzyme APOBEC-3C OS=Homo sapiens OX=9606 GN=APOBEC3C PE=1 SV=2	22.826	190	1.84414	0.882947	0.00938401	0.990959	4	18.4301	18.5268	17.5242	17.6668
Q8NDH3	PEPL1_HUMAN	NPEPL1	Probable aminopeptidase NPEPL1 OS=Homo sapiens OX=9606 GN=NPEPL1 PE=1 SV=3	55.861	523	1.84254	0.881697	0.29942	0.990959	4	18.481	17.9738	16.7635	17.9279
Q5D0E6	DALD3_HUMAN	DALRD3	DALR anticodon-binding domain-containing protein 3 OS=Homo sapiens OX=9606 GN=DALRD3 PE=1 SV=2	59.363	543	1.83977	0.879523	0.462341	0.990959	4	17.2588	16.9174	17.1688	15.2483
Q04727	TLE4_HUMAN	TLE4	Transducin-like enhancer protein 4 OS=Homo sapiens OX=9606 GN=TLE4 PE=1 SV=3	83.755	773	1.8267	0.86924	0.482256	0.990959	4	15.7428	15.5945	13.7865	15.8124
Q5VV52	ZN691_HUMAN	ZNF691	Zinc finger protein 691 OS=Homo sapiens OX=9606 GN=ZNF691 PE=1 SV=2	35.81	315	1.80884	0.855067	0.757856	0.99164	3	13.4429	13.7926	10.3463	15.179
Q9NXA8	SIR5_HUMAN	SIRT5	NAD-dependent protein deacylase sirtuin-5, mitochondrial OS=Homo sapiens OX=9606 GN=SIRT5 PE=1 SV=2	33.881	310	1.79841	0.846723	0.176386	0.990959	4	17.5687	17.5037	16.2784	17.1005
Q99595	TI17A_HUMAN	TIMM17A	Mitochondrial import inner membrane translocase subunit Tim17-A OS=Homo sapiens OX=9606 GN=TIMM17A PE=1 SV=1	18.024	171	1.79397	0.843153	0.0662115	0.990959	4	17.9883	17.6075	16.8285	17.0809
Q8NHZ8	CDC26_HUMAN	CDC26	Anaphase-promoting complex subunit CDC26 OS=Homo sapiens OX=9606 GN=CDC26 PE=1 SV=1	9.777	85	1.79094	0.840714	0.0116851	0.990959	4	20.4081	20.2309	19.4552	19.5024
Q96LR5	UB2E2_HUMAN	UBE2E2	Ubiquitin-conjugating enzyme E2 E2 OS=Homo sapiens OX=9606 GN=UBE2E2 PE=1 SV=1	22.255	201	1.78444	0.83547	0.118291	0.990959	4	13.1296	13.7313	12.692	12.498
O43829	ZBT14_HUMAN	ZBTB14	Zinc finger and BTB domain-containing protein 14 OS=Homo sapiens OX=9606 GN=ZBTB14 PE=1 SV=2	50.956	449	1.78062	0.832382	0.055188	0.990959	4	15.8745	16.2739	15.1996	15.284
P62854	RS26_HUMAN	RPS26	40S ribosomal protein S26 OS=Homo sapiens OX=9606 GN=RPS26 PE=1 SV=3	13.015	115	1.77679	0.829269	0.350225	0.990959	4	20.1788	20.7946	19.0444	20.2704
Q8IZV5	RDH10_HUMAN	RDH10	Retinol dehydrogenase 10 OS=Homo sapiens OX=9606 GN=RDH10 PE=1 SV=1	38.087	341	1.76334	0.81831	0.464945	0.990959	4	19.1837	18.9811	17.3561	19.1721
Q9NTX7	RN146_HUMAN	RNF146	E3 ubiquitin-protein ligase RNF146 OS=Homo sapiens OX=9606 GN=RNF146 PE=1 SV=1	38.95	359	1.75772	0.813704	0.110804	0.990959	4	16.6482	16.2478	15.8524	15.4162
Q99643	C560_HUMAN	SDHC	Succinate dehydrogenase cytochrome b560 subunit, mitochondrial OS=Homo sapiens OX=9606 GN=SDHC PE=1 SV=1	18.61	169	1.74661	0.804559	0.599005	0.990959	4	18.638	17.9685	18.7545	16.2428
O14925	TIM23_HUMAN	TIMM23	Mitochondrial import inner membrane translocase subunit Tim23 OS=Homo sapiens OX=9606 GN=TIMM23 PE=1 SV=1	21.943	209	1.74173	0.80052	0.0785136	0.990959	4	20.4156	20.369	19.8293	19.3543
P51825	AFF1_HUMAN	AFF1	AF4/FMR2 family member 1 OS=Homo sapiens OX=9606 GN=AFF1 PE=1 SV=1	131.422	1210	1.73876	0.798063	0.0741329	0.990959	4	18.5385	18.8938	18.0647	17.7715
Q9UMX3	BOK_HUMAN	BOK	Bcl-2-related ovarian killer protein OS=Homo sapiens OX=9606 GN=BOK PE=1 SV=1	23.28	212	1.73746	0.796981	0.172828	0.990959	4	15.0618	14.5973	14.3369	13.7282
Q9NZI7	UBIP1_HUMAN	UBP1	Upstream-binding protein 1 OS=Homo sapiens OX=9606 GN=UBP1 PE=1 SV=1	60.491	540	1.73172	0.792206	0.230987	0.990959	4	18.7859	19.0692	17.6918	18.5789
Q9Y4F3	MARF1_HUMAN	MARF1	Meiosis regulator and mRNA stability factor 1 OS=Homo sapiens OX=9606 GN=MARF1 PE=1 SV=6	192.859	1742	1.73098	0.791587	0.260451	0.990959	4	17.3131	17.0405	15.8943	16.8761
Q9Y2I7	FYV1_HUMAN	PIKFYVE	1-phosphatidylinositol 3-phosphate 5-kinase OS=Homo sapiens OX=9606 GN=PIKFYVE PE=1 SV=3	237.136	2098	1.7291	0.790025	0.0129581	0.990959	4	16.9003	16.7426	15.9863	16.0765
Q13563	PKD2_HUMAN	PKD2	Polycystin-2 OS=Homo sapiens OX=9606 GN=PKD2 PE=1 SV=3	109.691	968	1.72704	0.788303	0.297135	0.990959	4	15.9675	15.9539	14.6083	15.7365
Q7LFL8	CXXC5_HUMAN	CXXC5	CXXC-type zinc finger protein 5 OS=Homo sapiens OX=9606 GN=CXXC5 PE=1 SV=1	32.977	322	1.72492	0.78653	0.173727	0.990959	4	14.7541	15.5058	14.2936	14.3933
Q14CN4	K2C72_HUMAN	KRT72	Keratin, type II cytoskeletal 72 OS=Homo sapiens OX=9606 GN=KRT72 PE=1 SV=2	55.877	511	1.71928	0.781804	0.0301912	0.990959	4	17.2151	16.9397	16.2767	16.3144
Q9H2C2	ARV1_HUMAN	ARV1	Protein ARV1 OS=Homo sapiens OX=9606 GN=ARV1 PE=1 SV=1	31.052	271	1.71686	0.779772	0.245728	0.990959	4	16.7445	17.4431	15.9848	16.6432
P63279	UBC9_HUMAN	UBE2I	SUMO-conjugating enzyme UBC9 OS=Homo sapiens OX=9606 GN=UBE2I PE=1 SV=1	18.007	158	1.71136	0.775147	0.323825	0.990959	4	24.7108	24.1095	23.119	24.151
Q8NB91	FANCB_HUMAN	FANCB	Fanconi anemia group B protein OS=Homo sapiens OX=9606 GN=FANCB PE=1 SV=1	97.726	859	1.70665	0.771166	0.134993	0.990959	4	17.6971	17.4732	16.5181	17.1098
A8MWD9	RUXGL_HUMAN	SNRPGP15	Putative small nuclear ribonucleoprotein G-like protein 15 OS=Homo sapiens OX=9606 GN=SNRPGP15 PE=5 SV=2	8.544	76	1.69754	0.76345	0.357877	0.990959	4	24.414	24.0414	22.8473	24.0812
Q9NQG6	MID51_HUMAN	MIEF1	Mitochondrial dynamics protein MID51 OS=Homo sapiens OX=9606 GN=MIEF1 PE=1 SV=1	51.293	463	1.69315	0.759709	0.430962	0.990959	4	17.5066	17.9934	16.2532	17.7275
P24311	COX7B_HUMAN	COX7B	Cytochrome c oxidase subunit 7B, mitochondrial OS=Homo sapiens OX=9606 GN=COX7B PE=1 SV=2	9.161	80	1.67996	0.748423	0.308323	0.990959	4	22.7111	22.715	21.4121	22.5172
O95149	SPN1_HUMAN	SNUPN	Snurportin-1 OS=Homo sapiens OX=9606 GN=SNUPN PE=1 SV=1	41.143	360	1.67055	0.740319	0.118248	0.990959	4	18.9263	19.017	17.955	18.5077
Q15011	HERP1_HUMAN	HERPUD1	Homocysteine-responsive endoplasmic reticulum-resident ubiquitin-like domain member 1 protein OS=Homo sapiens OX=9606 GN=HERPUD1 PE=1 SV=1	43.72	391	1.67024	0.740059	0.0948997	0.990959	4	17.655	17.2638	16.8682	16.5705
Q8N8J7	F241A_HUMAN	FAM241A	Uncharacterized protein FAM241A OS=Homo sapiens OX=9606 GN=FAM241A PE=2 SV=2	14.653	132	1.66359	0.734304	0.360945	0.990959	4	18.4845	17.7407	16.876	17.8805
O43504	LTOR5_HUMAN	LAMTOR5	Ragulator complex protein LAMTOR5 OS=Homo sapiens OX=9606 GN=LAMTOR5 PE=1 SV=1	9.614	91	1.65696	0.728537	0.167662	0.990959	4	19.5828	18.8967	18.5146	18.5078
Q9BQA9	CYBC1_HUMAN	CYBC1	Cytochrome b-245 chaperone 1 OS=Homo sapiens OX=9606 GN=CYBC1 PE=1 SV=1	20.774	187	1.64543	0.718465	0.611504	0.990959	4	16.8087	16.7427	17.2617	14.8527
P68402	PA1B2_HUMAN	PAFAH1B2	Platelet-activating factor acetylhydrolase IB subunit alpha2 OS=Homo sapiens OX=9606 GN=PAFAH1B2 PE=1 SV=1	25.569	229	1.64202	0.715469	0.358659	0.990959	4	22.0682	21.9264	20.6807	21.8829
Q9NX76	CKLF6_HUMAN	CMTM6	CKLF-like MARVEL transmembrane domain-containing protein 6 OS=Homo sapiens OX=9606 GN=CMTM6 PE=1 SV=1	20.419	183	1.64034	0.713995	0.26276	0.990959	4	18.0463	17.6423	16.7141	17.5466
Q969G6	RIFK_HUMAN	RFK	Riboflavin kinase OS=Homo sapiens OX=9606 GN=RFK PE=1 SV=2	17.623	155	1.63968	0.713418	0.0323385	0.990959	4	18.8079	18.6331	17.9089	18.1053
Q29980	MICB_HUMAN	MICB	MHC class I polypeptide-related sequence B OS=Homo sapiens OX=9606 GN=MICB PE=1 SV=2	42.575	383	1.6357	0.709906	0.328412	0.990959	4	19.4106	19.4271	18.1552	19.2627
Q96FK6	WDR89_HUMAN	WDR89	WD repeat-containing protein 89 OS=Homo sapiens OX=9606 GN=WDR89 PE=2 SV=1	43.215	387	1.6306	0.705405	0.262606	0.990959	4	17.4428	17.155	17.0271	16.1598
Q9HB20	PKHA3_HUMAN	PLEKHA3	Pleckstrin homology domain-containing family A member 3 OS=Homo sapiens OX=9606 GN=PLEKHA3 PE=1 SV=2	33.861	300	1.6287	0.703721	0.357848	0.990959	4	15.8309	15.8446	15.728	14.54
O15504	NUP42_HUMAN	NUP42	Nucleoporin NUP42 OS=Homo sapiens OX=9606 GN=NUP42 PE=1 SV=1	44.872	423	1.62487	0.700324	0.328973	0.990959	4	19.4533	19.6028	19.3698	18.2857
Q9NX05	F120C_HUMAN	FAM120C	Constitutive coactivator of PPAR-gamma-like protein 2 OS=Homo sapiens OX=9606 GN=FAM120C PE=1 SV=3	120.588	1096	1.62447	0.699968	0.213695	0.990959	4	17.0411	17.0398	15.9516	16.7294
Q4ADV7	RIC1_HUMAN	RIC1	Guanine nucleotide exchange factor subunit RIC1 OS=Homo sapiens OX=9606 GN=RIC1 PE=1 SV=2	159.301	1423	1.62155	0.697378	0.240451	0.990959	4	16.5914	16.0313	15.93	15.2979
P24863	CCNC_HUMAN	CCNC	Cyclin-C OS=Homo sapiens OX=9606 GN=CCNC PE=1 SV=2	33.243	283	1.62072	0.696638	0.475926	0.990959	4	17.5039	17.0768	15.8222	17.3652
Q8N488	RYBP_HUMAN	RYBP	RING1 and YY1-binding protein OS=Homo sapiens OX=9606 GN=RYBP PE=1 SV=2	24.822	228	1.61071	0.687695	0.0794928	0.990959	4	15.8129	15.9044	15.3722	14.9697
Q8N9M5	TM102_HUMAN	TMEM102	Transmembrane protein 102 OS=Homo sapiens OX=9606 GN=TMEM102 PE=1 SV=1	54.175	508	1.61032	0.687346	0.373472	0.990959	4	14.9711	13.8265	13.5165	13.9065
Q9UH92	MLX_HUMAN	MLX	Max-like protein X OS=Homo sapiens OX=9606 GN=MLX PE=1 SV=2	33.3	298	1.60775	0.685047	0.0998707	0.990959	4	16.251	16.6083	15.8964	15.5928
Q8N511	TM199_HUMAN	TMEM199	Transmembrane protein 199 OS=Homo sapiens OX=9606 GN=TMEM199 PE=1 SV=1	23.13	208	1.60574	0.683237	0.554616	0.990959	4	18.8769	18.5643	17.0788	18.9959
Q16600	ZN239_HUMAN	ZNF239	Zinc finger protein 239 OS=Homo sapiens OX=9606 GN=ZNF239 PE=1 SV=3	51.591	458	1.60504	0.682608	0.427204	0.990959	4	16.5201	16.0301	16.2383	14.9467
Q9H8M5	CNNM2_HUMAN	CNNM2	Metal transporter CNNM2 OS=Homo sapiens OX=9606 GN=CNNM2 PE=1 SV=2	96.623	875	1.60029	0.678334	0.602296	0.990959	4	14.3302	15.5032	15.1768	13.3
Q96KN1	LRAT2_HUMAN	LRATD2	Protein LRATD2 OS=Homo sapiens OX=9606 GN=LRATD2 PE=1 SV=1	34.474	310	1.59946	0.677582	0.0767292	0.990959	4	17.2886	17.6263	16.6739	16.8858
Q9Y3D2	MSRB2_HUMAN	MSRB2	Methionine-R-sulfoxide reductase B2, mitochondrial OS=Homo sapiens OX=9606 GN=MSRB2 PE=1 SV=2	19.536	182	1.59537	0.673894	0.553745	0.990959	4	16.6058	16.9648	17.05	15.1728
Q8TF46	DI3L1_HUMAN	DIS3L	DIS3-like exonuclease 1 OS=Homo sapiens OX=9606 GN=DIS3L PE=1 SV=2	120.787	1054	1.59427	0.672895	0.368751	0.990959	4	15.5065	15.8678	15.5703	14.4583
Q9H3H5	GPT_HUMAN	DPAGT1	UDP-N-acetylglucosamine--dolichyl-phosphate N-acetylglucosaminephosphotransferase OS=Homo sapiens OX=9606 GN=DPAGT1 PE=1 SV=2	46.09	408	1.58881	0.667946	0.382947	0.990959	4	19.7922	19.3972	18.3577	19.4958
P39210	MPV17_HUMAN	MPV17	Protein Mpv17 OS=Homo sapiens OX=9606 GN=MPV17 PE=1 SV=1	19.733	176	1.5858	0.665215	0.200508	0.990959	4	17.393	16.9886	16.2357	16.8154
P82912	RT11_HUMAN	MRPS11	28S ribosomal protein S11, mitochondrial OS=Homo sapiens OX=9606 GN=MRPS11 PE=1 SV=2	20.616	194	1.58511	0.664581	0.248182	0.990959	4	18.5791	18.7491	17.5962	18.4028
Q9Y2R5	RT17_HUMAN	MRPS17	28S ribosomal protein S17, mitochondrial OS=Homo sapiens OX=9606 GN=MRPS17 PE=1 SV=1	14.502	130	1.57102	0.651697	0.199045	0.990959	4	19.6836	19.5705	18.6356	19.3152
Q6IPR3	TYW3_HUMAN	TYW3	tRNA wybutosine-synthesizing protein 3 homolog OS=Homo sapiens OX=9606 GN=TYW3 PE=1 SV=2	29.794	259	1.56586	0.646954	0.0887734	0.990959	4	17.252	17.3145	16.8407	16.4319
P78368	KC1G2_HUMAN	CSNK1G2	Casein kinase I isoform gamma-2 OS=Homo sapiens OX=9606 GN=CSNK1G2 PE=1 SV=1	47.457	415	1.56452	0.645719	0.696979	0.990959	4	17.3056	16.3753	14.8362	17.5532
[truncated: 7,315 more rows]

## Sheet: 245
	Table SII. Detailed information of the proteins identified by MS.
[truncated: 246 more rows]
